# Supplementary material for: Ataxia Telangiectasia-Mutated–Dependent DNA Damage Checkpoint Functions Regulate Gene Expression in Human Fibroblasts
Source: Oxford University Press journal article supplement (doi:10.1158/1541-7786.mcr-07-0104), 2007-08-01
Supplement: 15417786mcr070104-sup-suppl3_ir_response_from_2_of_3_at_lines_1091.xls [file 15417786mcr070104-sup-suppl3_ir_response_from_2_of_3_at_lines_1091.xls]

## Sheet: 1091
CLONE	Gene symble	Description	AT_sham_6h_C3	AT_sham_6h_C5	AT_Gy_2h_C3	AT_Gy_2h_C5	AT_Gy_6h_C3	AT_Gy_6h_C5	AT_Gy_24h_C3	AT_Gy_24h_C5	AT2_sham_6h_C3	AT2_sham_6h_C5	AT2_Gy_2h_C3	AT2_Gy_2h_C5	AT2_Gy_6h_C3	AT2_Gy_6h_C5	AT2_Gy_24h_C3	AT2_Gy_24h_C5	AT3_sham_6h_C3	AT3_sham_6h_C5	AT3_Gy_2h_C3	AT3_Gy_2h_C5	AT3_Gy_6h_C3	AT3_Gy_6h_C5	AT3_Gy_24h_C3	AT3_Gy_24h_C5
I_962003	384D8-2	Protein of unknown function, has high similarity to uncharacterized mouse D15Ertd785e	0.05507	-0.05507	0.16432	0.0476	0.12029	-0.03504	-0.57665	-0.61151	-0.01813	0.01813	-0.08909	-0.1068	-0.07992	0.04121	-0.74863	-0.41088	-0.14365	0.14365	0.34883	0.16999	0.27507	0.13793	-0.41269	-0.44428
I_932542	A2M	Alpha-2-macroglobulin, a protease inhibitor that binds and aids in the cellular uptake of cytokines and other proteins, may mediate the clearance of amyloid beta peptide from the brain, may be involved in the pathogenesis of sickle cell disease	-0.10393	0.10392	-1.56565	-1.66732	-0.38416	0.33867	-0.61346	-0.30963	0.36232	-0.36233	-0.88698	-0.8189	-0.42677	-0.52017	-0.6164	0.01615	0.64934	-0.64934	-0.89828	-0.39877	-0.90847	-0.56943	-1.93704	-2.49239
I_959675	ABCA6	ATP-binding cassette subfamily A (ABC1) member 6, a putative ATP-binding cassette (ABC) transporter, may function in macrophage lipid homeostasis	-0.09529	0.09528	-0.08283	0.2295	0.31036	0.01599	0.52961	0.61441	0.00182	-0.00182	0.13019	0.01094	0.07006	0.04464	0.61453	0.15112	0.08566	-0.08566	-0.90493	-0.59475	-1.0588	-1.20946	-0.25443	0.07582
I_956958	ACAT2	Acetyl-Coenzyme A acetyltransferase 2 (cytosolic acetoacetyl Coenzyme A thiolase), a liver enzyme that functions in acyl-CoA metabolism	0.04551	-0.04551	0.04338	-0.05134	0.04219	-0.061	0.207	-0.0325	0.20821	-0.20821	-0.031	-0.00178	-0.09326	-0.17571	-1.03147	-0.77296	-0.05939	0.05939	-0.17099	0.06773	-0.03023	0.24019	-0.45765	-0.34593
I_964840	ACOX2	Branched chain acyl-coenzyme A oxidase 2, catalyzes the degradation of long branched-chain fatty acids and bile acid intermediates	0.04289	-0.0429	-0.05203	-0.06594	-0.13353	0.0839	0.72818	0.67356	0.17768	-0.17768	-0.08831	-0.13116	0.06999	-0.20974	0.35281	0.72597	0.03268	-0.03268	0.03712	-0.14219	-0.1304	0.1107	0.63046	0.87568
I_1002000	AD024	Protein of unknown function, has high similarity to uncharacterized mouse 2600017H08Rik	-0.04576	0.04575	0.34099	0.31916	0.10113	0.06714	-0.6611	-0.84582	0.25679	-0.2568	0.14674	0.16459	0.03297	0.01769	-0.60529	-0.42948	-0.05571	0.0557	0.24467	0.44815	0.03282	0.16985	-1.75882	-1.72655
I_1000522	ADAM9	A disintegrin and metalloprotease domain 9 (meltrin gamma), a putative integrin receptor or ligand and metalloprotease that mediates cell-cell adhesion via interaction with integrins, expressed at elevated levels in hematologic malignancies	0.01085	-0.01085	0.34119	0.31919	-0.05455	0.07419	0.54724	0.44222	-0.03219	0.03219	0.24093	0.38508	0.34344	0.26257	0.50576	0.70711	0.02137	-0.02137	-0.17404	-0.11208	0.01295	-0.10527	0.34534	0.13541
I_963028	ADD3	Adducin 3 (gamma), a member of the adducin family of cytoskeletal proteins, may contribute to plasma membrane skeletal organization; downregulated in astrocytomas	-0.07348	0.07348	0.01334	-0.05029	-0.13115	-0.11837	0.60013	0.44415	0.26686	-0.26685	-0.14465	-0.17158	0.03212	-0.19904	0.22941	0.19305	-0.05177	0.05177	-0.20699	0.00317	-0.23029	0.10102	0.05516	0.29823
I_964101	ADM	Precursor of adrenomedullin and proadrenomedullin-N20, hypotensive peptides involved in cardiovascular, renal and endocrine function, increased expression may contribute to type II diabetes in some individuals	-0.0747	0.07471	-0.17838	-0.28026	-0.12987	-0.15017	0.27747	0.33273	0.06164	-0.06164	-0.27754	-0.21545	0.19474	0.17264	0.97039	1.14843	-0.06734	0.06735	-0.46937	-0.64865	0.11923	0.07561	0.46522	0.37623
I_929043	ADPRT	ADP-ribosyltransferase, catalyzes formation of ADP ribose polymers attached to proteins using NAD(+) as substrate in response to DNA damage, modulates chromatin structure and plays a role in DNA repair and apoptosis	-0.01638	0.01637	-0.06414	-0.07178	-0.0536	-0.08204	-0.00833	-0.09451	0.11577	-0.11576	-0.05512	-0.0102	-0.10048	-0.04947	-0.36058	-0.42715	-0.03721	0.03721	0.01173	0.0756	-0.12567	0.06792	-0.78308	-0.82326
I_959722	ADPRTL2	ADP-ribosyltransferase NAD+ poly(ADP-ribose) polymerase-like 2, member of the PARP (ADPRT) family, proposed to catalyze poly ADP-ribosylation of proteins in response to DNA breaks	0.20995	-0.20996	-0.54715	-0.31737	-0.38425	-0.2303	-0.51881	-0.56312	0.05512	-0.05511	-0.13134	0.02988	-0.01662	0.01018	-0.77965	-0.6781	0.06413	-0.06414	0.05645	0.02971	-0.00688	-0.01153	-0.71017	-0.6493
I_958940	AF15Q14	AF15q14 protein, contains a bipartite nuclear localization site, expressed predominantly in the testis and in lung cancers of patients who smoke; corresponding gene is fused to the MLL gene in some patients with acute myeloid leukemia	-0.13423	0.13423	0.42424	0.63077	0.07412	0.22732	-0.89004	-0.93807	0.02499	-0.02499	0.36195	0.41886	0.22332	0.20487	0.04166	0.29336	0.25039	-0.25039	0.44525	0.38303	0.26026	-0.14951	-1.53111	-1.37866
I_966664	AIG-1	Androgen induced protein, upregulated by androgen, may function in androgen-regulated hair follicle growth	0.02843	-0.02844	-0.10633	-0.20075	-0.04595	-0.15866	0.8256	0.52777	0.0119	-0.0119	-0.10019	-0.06267	-0.06022	-0.1489	0.16785	0.18226	-0.09281	0.09281	-0.27632	-0.08281	-0.20914	0.06754	0.21854	0.18517
I_957570	AKAP1	A kinase anchor protein 1, anchors protein kinase A to subcellular locations, interacts with both the type I and type II regulatory subunits	-0.07522	0.07521	-0.57628	-0.25021	-0.57388	-0.18088	-0.42727	-0.3498	0.23231	-0.23231	-0.27332	-0.3808	-0.18757	-0.29357	-0.42617	-0.35617	0.09678	-0.09679	-0.05897	-0.16539	-0.03736	-0.09328	-0.6249	-0.60785
I_957795	AKAP12	A kinase anchor protein 12 (Gravin), anchor protein for protein kinase A and protein kinase C, provides a scaffold during receptor desensitization; decreased expression in prostate tumors and pulmonary adenocarcinoma, autoantigen in myasthenia gravis	-0.16578	0.16577	0.58088	0.44427	0.16076	0.32427	0.50646	0.82109	0.21707	-0.21706	0.0845	-0.11701	-0.06716	-0.20144	0.39527	0.367	-0.09482	0.09483	0.44096	0.17116	0.08272	0.19229	0.73143	0.827
I_963167	AKR1C2	Aldo keto reductase family 1 member C2 (dihydrodiol dehydrogenase), functions in bile transport, steroid metabolism, and xenobiotic metabolism, may play a role in behavior modification mediated by selective serotonin reuptake inhibitors	-0.07756	0.07756	-0.31013	-0.29297	-0.2264	-0.05878	0.53553	0.68175	-0.11445	0.11445	0.50948	0.41767	0.27241	0.3128	0.71517	0.87012	0.22469	-0.22469	-0.67496	-0.73875	-0.35701	-0.62793	0.33913	0.3047
I_932290	AKR1C3	Aldo keto reductase family 1 member C3, a type 2 3 alpha (17 beta)-hydroxysteroid dehydrogenase and member of the aldo keto reductase superfamily that functions in steroid metabolism and action and may contribute to cell growth and differentiation	-0.18046	0.18046	-0.73934	-0.2265	-0.27841	-0.11743	0.61886	0.5539	0.19899	-0.19899	-0.27255	-0.41389	-0.22567	-0.36354	0.55835	0.51906	0.13082	-0.13081	-0.45051	-0.42866	-0.24839	-0.1042	0.68262	0.52491
I_962500	ALP	Alpha-actinin-2-associated LIM protein, expressed in skeletal and heart muscle, contains an N-terminal PDZ domain and a C-terminal LIM domain, may bind alpha actinin 2 (ACTN2)	-0.4174	0.4174	-0.554	-0.07086	-0.27096	0.3707	-0.36507	-0.07868	0.65465	-0.65465	-1.74276	-2.68917	-2.61904	-2.36087	-1.5231	-2.43465	0.14494	-0.14494	-1.14035	-0.02497	-0.74158	-0.20747	-2.76056	-3.75021
I_928751	ALS2CR9	Protein containing a pleckstrin homology (PH) domain, which mediate protein-protein and protein-lipid interactions, has moderate similarity to amyloid beta (A4) precursor protein-binding family B member 1 interacting protein (mouse Apbb1ip)	0.05972	-0.05972	0.50469	0.59657	-0.2089	0.16168	0.41198	0.37344	0.15429	-0.15429	0.4313	-0.20394	-0.02375	0.10506	0.06829	0.0198	-0.09263	0.09263	0.2494	0.07931	-0.20939	-0.05213	0.27791	0.6645
I_957207	AMD1	S-adenosylmethionine decarboxylase 1, catalyzes the removal of the carboxylate group of S-adenosylmethionine to form S-adenosyl-5-3-methylpropylamine in the polyamine biosynthesis pathway, involved in cell proliferation	-0.11324	0.11325	0.4974	0.66684	0.12334	0.1038	-0.28925	-0.02623	0.28447	-0.28447	0.1384	0.23633	-0.11048	-0.15709	-0.29705	0.02287	0.04758	-0.04758	0.15552	0.07899	0.05298	0.02246	-0.08654	-0.32617
I_966332	AMH	Anti-Mullerian hormone, a glycoprotein member of the transforming growth factor beta superfamily that induces Mullerian duct regression in males during embryonic development; mutation of the corresponding gene may cause persistent Mullerian duct syndrome	0.35826	-0.35826	-0.86825	-1.18031	-0.99064	-0.67772	-1.36241	-1.04541	0.00536	-0.00536	0.06516	-0.04913	-0.4038	-0.33536	0.24475	0.07587	-0.02007	0.02007	-0.06199	-0.04801	0.11772	-0.33245	0.32592	1.34604
I_930513	ANGPTL2	Angiopoietin-like 2 (angiopoietin-related protein 2), a secreted protein with coiled-coil and fibrinogen-like domains that is a member of a family of vascular endothelial growth factors, may contribute to angiogenesis	-0.09908	0.09908	-0.06338	0.11633	-0.1061	-0.14439	0.71453	0.94696	0.1422	-0.1422	0.15859	0.03748	0.04242	0.02106	0.70185	0.44704	-0.14739	0.14739	-0.34641	-0.43763	-0.34048	-0.25959	-0.01196	-0.18667
I_1906149	ANK1	Ankyrin 1, a cytoskeletal anchor protein that attaches cytoskeletal elements to the plasma membrane; alteration of the corresponding gene is associated with hereditary spherocytosis	1.19568	-1.19568	-0.74768	-0.60583	-0.77527	0.32851	-0.66513	0.41836	0.34863	-0.34863	-0.30057	-0.16865	-0.00631	0.09438	0.0718	0.54831	-0.03135	0.03135	-0.29484	-0.11577	0.1409	-0.08749	0.40018	0.43707
I_964209	ANKRA2	Protein with an ankyrin repeat domain and a member of family A of RFXANK-like proteins	0.13402	-0.13402	-0.22766	-0.45044	0.11716	-0.19602	0.38023	0.13724	-0.05883	0.05883	-0.06506	0.01636	0.01395	0.20787	0.2386	0.2945	-0.04259	0.04259	-0.20585	-0.01822	-0.08965	0.06317	0.24189	0.41424
I_959421	ANKT	Protein of unknown function, has high similarity to uncharacterized mouse 2610201A12Rik	0.00855	-0.00855	0.19877	0.09029	0.208	0.08602	-0.30933	-0.25449	-0.07896	0.07896	-0.02221	0.09479	0.00386	0.21416	-0.24204	-0.21927	0.07217	-0.07218	0.33968	0.26675	0.19947	0.1619	-1.03656	-1.09708
I_929934	ANLN	Aniline, an actin binding protein that interacts with cleavage furrow proteins such as septins and may play a role in cytokinesis	-0.04386	0.04386	0.34597	0.50012	0.14884	0.16465	-0.5789	-0.50727	0.23017	-0.23017	0.19932	0.18172	-0.00021	-0.25148	-0.27318	-0.22288	0.07606	-0.07606	-0.04543	0.09943	-0.17849	0.0563	-1.50993	-1.38793
I_938795	ANXA4	Annexin IV, a calcium-dependent phospholipid-binding protein involved in regulation of transmembrane conductance and endocytosis, inhibits phospholipase A2, and has in vitro anticoagulation activity, may confer paclitaxel resistance to cancer cell lines	0.00578	-0.00579	-0.14476	-0.02194	0.01101	-0.06458	0.49977	0.48465	0.11762	-0.11762	-0.0375	-0.18532	-0.10045	-0.03943	0.2081	0.15615	0.04209	-0.04209	-0.15836	0.0143	-0.0884	0.08899	0.28357	0.37126
I_930023	APLP2	Amyloid precursor-like protein 2, a nuclear protein that may contribute to neurogenesis and cell cycle control, may be cleaved to produce a cytoxic peptide that plays a role in Alzheimer disease	-0.0651	0.0651	-0.19759	0.01487	-0.01223	0.07849	-0.14756	0.16499	0.26653	-0.26654	-0.12729	-0.35748	-0.03308	-0.22954	0.24139	0.01308	-0.08285	0.08285	-0.31042	-0.27474	-0.28431	-0.12119	0.33386	0.4114
I_961947	APOBEC3B	Phorbolin 2, an uncharacterized protein with moderate similarity to APOBEC1L and murine Aid	0.08077	-0.08077	0.2199	-0.0978	0.05641	-0.0117	-0.20012	-0.61098	0.08381	-0.08381	0.15362	0.20007	-0.02439	0.02176	-0.56035	-0.20185	-0.11188	0.11188	-0.04105	0.10441	-0.02277	0.12789	-0.87712	-0.72217
I_961948	APOBEC3C	Apolipoprotein B mRNA editing enzyme catalytic polypeptide-like 3C, a cytidine deaminase that mutates DNA residues in bacterial assays	-0.47042	0.47042	-0.34222	-0.11536	-0.08813	0.05923	0.62598	0.09277	0.16656	-0.16656	0.02515	-0.64292	0.62601	-0.33369	0.98598	1.02279	-0.04777	0.04777	0.4334	0.47596	0.1271	0.53936	0.90538	1.49721
I_960897	APOE	Apolipoprotein E, low density lipoprotein receptor (LDLR) ligand that is involved in clearance of circulating cholesterol; variant forms are associated with type III hyperlipoproteinemia, atherosclerosis, Alzheimers disease, and myocardial infarction	0.22668	-0.22669	-1.44421	-0.94534	-0.89322	-0.6569	-1.03806	-0.67864	-0.05565	0.05565	-0.69523	-0.40971	-0.76134	-0.65104	-0.35448	-0.24209	0.17014	-0.17014	0.62902	-0.04639	0.48521	0.26694	0.20015	0.17337
I_961472	APOL3	Apolipoprotein L-III, a member of the apolipoprotein L family, may play a role in lipid metabolism, exchange and transport, and may mediate the effects of cytokines on vascular endothelial cells	0.00159	-0.00159	-0.57392	-0.24352	0.06357	-0.19295	0.79201	0.18011	-0.31568	0.31568	0.15565	0.13325	0.11875	0.40215	0.41248	0.48042	0.03262	-0.03262	0.0448	-0.33497	0.1085	-0.01903	0.54542	0.6989
I_962152	APP	Amyloid beta (A4) precursor protein, cell surface protease inhibitor that reduces copper, deposits of proteolytic peptide products are found in Alzheimers disease and Down syndrome brains; gene mutations are linked to early-onset Alzheimers disease	-0.12404	0.12404	-0.18952	0.03839	-0.09052	-0.04714	0.32115	0.35544	-0.04381	0.04381	-0.04754	0.12782	0.16383	0.20874	0.5577	0.50772	0.18326	-0.18327	-0.3865	-0.58849	-0.36079	-0.54563	-0.06151	-0.11967
I_962557	APXL	Apical protein Xenopus laevis-like, a putative amiloride-sensitive sodium channel; deletion of corresponding gene found in some patients with ocular albinism type 1	0.15191	-0.15191	0.49177	-0.05992	-0.35663	-0.20356	-0.15541	-0.18621	-0.18122	0.18122	-0.32294	-0.16466	-0.13513	-0.36891	-0.43379	-0.32549	0.13279	-0.13279	-0.25268	-0.00232	-0.16436	-0.07507	-0.87342	-0.60946
I_962732	ARHGAP11A	Protein containing a RhoGAP (GTPase activator protein) domain, has a region of low similarity to a region of Rho GTPase activating protein 6 (mouse Arhgap6), which is a GTPase activating protein for mouse Arha2 that recruits F-actin	-0.1251	0.1251	0.30443	0.01941	0.26518	0.01991	-0.22664	-0.46562	-0.00693	0.00693	0.22233	0.11828	0.06555	-0.1708	-0.01131	0.48749	-0.0214	0.0214	0.62046	0.41789	0.07463	0.36064	-1.03789	-0.81734
I_962872	ARHGAP15	Protein containing a pleckstrin homology (PH) domain, which mediates protein-protein and protein-lipid interactions and a RhoGAP (GTPase activator protein) domain	-0.12147	0.12147	1.92699	0.27719	1.92699	-0.02113	-1.0361	-0.64741	0.1358	-0.13581	-0.89427	0.75835	-0.67014	0.84448	-0.20926	-0.02267	0.31942	-0.31943	0.77102	0.41297	0.75902	1.01649	-0.82421	-0.97754
I_962528	ARHGAP6	Rho GTPase activating protein 6, a protein with multiple splice forms that contains a GTPase-activating protein (GAP) domain likely to be active for the Rho subfamily of GTP-binding proteins and containing a putative SH3 domain-binding site	0.08204	-0.08204	-1.34015	-1.13173	-0.89307	-0.27869	-0.59704	-0.60185	-0.24105	0.24105	-1.89465	-2.08291	1.18144	-0.54757	-1.60999	-0.164	-0.23157	0.23157	-0.81821	-0.79413	-0.64743	-0.67677	-0.2273	-1.06806
I_929660	ARL4	ADP-ribosylation factor like 4, a GTPase that may function in embryo development; inactivation of mouse Arl4 results in reduced sperm count, but does not affect fertility	-0.108	0.10799	0.32753	0.20515	-0.20405	-0.09573	0.002	-0.03629	0.28963	-0.28963	-0.15775	-0.21538	-0.2165	-0.10586	-0.47588	-0.57177	0.0335	-0.0335	0.02279	0.26302	-0.11259	-0.04238	-0.69007	-0.47492
I_1100118	ARL6IP	Protein with very strong similarity to ADP-ribosylation-like factor 6 interacting protein (mouse Arl6ip), which binds ADP-ribosylation factor-like 6 (mouse Arl6) and may be involved in protein trafficking and signaling in hematopoiesis	-0.00254	0.00253	0.19768	0.05317	0.28822	0.19258	-0.22538	-0.40448	-0.01401	0.01401	0.23337	0.29687	0.05838	0.24359	0.56823	0.30854	0.03685	-0.03684	0.0979	0.25546	0.08855	0.35649	-1.03093	-0.9857
I_1221849	ARNTL2	Transcription factor BMAL2, basic helix-loop-helix/PAS domain transcription factor, heterodimerizes with other factors, regulates circadian oscillation of plasminogen activator inhibitor 1 (PAI1), may be involved in morning onset of myocardial infarction	-0.03996	0.03997	-0.28305	-0.1853	1.07267	0.84373	-0.28226	-1.01994	-0.15134	0.15134	-0.13807	-0.09986	-0.14791	-0.07428	-0.57866	-0.31384	0.02386	-0.02386	0.33493	0.38772	0.44042	0.18025	-0.22521	0.13956
I_1100494	ASB5	Protein containing six ankyrin (Ank) repeats, has low similarity to ankyrin repeat and SOCS box-containing protein 1 (mouse Asb1), which plays a role in spermatogenesis and may function in targeting proteins for degradation	-0.01502	0.01503	0.16317	0.14641	-0.13651	-0.10919	0.19372	0.25791	-0.47787	0.47787	-0.82662	-0.77479	-0.90677	-1.449	-1.49883	-1.42693	-0.00512	0.00513	0.43513	0.14404	-0.2204	-0.07306	1.31595	1.0771
I_959899	ASC	Apoptosis-associated speck-like protein containing a CARD, an apoptosis activator which binds and activates procaspase-1 (CASP1), regulates cell growth and proliferation; corresponding gene is aberrantly methylated and silenced in breast cancer cells	0.01038	-0.01038	-0.47027	-0.30918	-0.07576	-0.07782	0.19321	0.09969	-0.08075	0.08075	-0.14413	-0.0917	-0.14353	0.06091	0.18847	0.14639	-0.03038	0.03038	-0.10109	-0.31088	-0.01035	-0.13915	0.30404	0.16082
I_929661	ASPH	Aspartyl beta-hydroxylase, hydroxylates Asp/Asn in EGF domains, has alternate splice forms junctin, which binds calsequestrins, ryanodine receptor, and triadin, and junctate, which binds calcium, overexpression is associated with malignant transformation	-0.23132	0.23132	0.38842	0.77754	0.28828	0.33121	0.51444	0.38151	0.18027	-0.18026	0.06672	-0.48563	0.05939	0.28457	1.00607	0.25568	-0.07972	0.07973	0.18482	0.24923	0.13859	0.39865	0.58665	0.77912
I_1152091	ASPM	Asp (abnormal spindle)-like microcephaly associated, contains 74 IQ calmodulin-binding domains, calponin homology and microtubule-binding domains, likely to act in brain development; gene mutation occurs in autosomal recessive primary microcephaly	-0.01599	0.01599	0.40875	0.35746	0.37007	0.32996	-0.36391	-0.482	0.23787	-0.23787	0.13541	0.15869	0.04551	-0.01546	-0.02733	-0.04845	-0.05266	0.05266	0.17831	0.36979	0.10364	0.34526	-1.74704	-1.57337
I_928809	ATP1A2	Na+-K+-transporting ATPase alpha 2 subunit, maintains the Na+ and K+ gradients across the plasma membrane, may function in fuel oxidation, deficiency causes familial type 2 hemiplegic migraines; polymorphisms correlate with lead-induced hypertension	-0.08839	0.08839	-0.79453	-0.48518	-0.39234	-0.1683	-0.20546	-0.53795	0.11608	-0.11608	-0.77795	-0.70741	-0.33238	-0.663	-0.47204	-0.25954	0.08462	-0.08462	-0.84024	-0.11218	0.31531	-0.01093	-0.87261	-1.2032
I_934077	ATP1B1	Beta 1 subunit of Na+:K+-ATPase, a putative sodium:potassium-exchanging ATPase	-0.07538	0.07538	-0.01797	0.11035	-0.05819	0.01537	-0.22604	-0.28311	0.20872	-0.20872	-0.01078	-0.16276	-0.16032	-0.14479	-0.37766	-0.53824	-0.02822	0.02822	-0.05564	0.13253	-0.17061	-0.03693	-0.4277	-0.38712
I_1152076	AUTS2	Autism-related protein 1, autism susceptibility gene 2; associated with autism in a monozygotic twin pair	-0.11247	0.11246	0.16097	0.23562	-0.1242	-0.04789	0.22242	0.15407	0.12155	-0.12155	0.01513	-0.14803	-0.08861	-0.18318	-0.19322	-0.1225	0.17202	-0.17201	-0.21715	-0.02259	-0.03004	0.02101	-1.72795	-1.50701
I_958944	B2M	Beta 2-microglobulin, component of class I major histocompatibility antigen that bind and present antigenic peptides to cytotoxic T lymphocytes (CTLs), major component of hemodialysis-associated amyloid fibrils, associated with cancer progression	-0.18723	0.18723	-0.08337	-0.07106	0.0577	-0.08136	0.37367	0.36207	0.10116	-0.10116	-0.1144	-0.17856	-0.00386	0.05371	0.33638	0.33333	0.07814	-0.07815	-0.60566	-0.446	-0.46104	-0.36094	-0.20954	-0.33718
I_935682	BACH	Cytosolic acyl coenzyme A thioester hydrolase, hyrolyzes acyl-CoAs of eight to eighteen carbons in length	-0.03119	0.03119	0.02623	0.0978	-0.04563	0.02045	-0.35517	-0.38706	0.06763	-0.06763	-0.15527	-0.15354	-0.08543	-0.06609	-0.52018	-0.44023	-0.02226	0.02226	0.2287	0.05707	0.08046	0.14	-0.04829	-0.11449
I_943901	BAF53A	BRG1 -associated factor 53A, an actin-related protein subunit of the BAF complex, required for optimal ATPase activity of the BRG1 (SMARCA4) subunit and for chromatin association of the complex during lymphocyte activation	-0.21476	0.21477	-0.20851	0.15089	-0.12178	0.09234	-0.16694	-0.10853	0.0586	-0.0586	-0.03604	-0.16969	-0.12512	-0.06071	-0.43381	-0.41752	0.10386	-0.10386	-0.02417	-0.09006	0.25764	-0.10831	-0.41289	-0.6647
I_957780	BAG2	BCL2 associated athanogene 2, a member of BAG family of proteins, regulates protein folding by inhibition of Hsc70/Hsp70 chaperone activity through high affinity binding to the Hsc70/Hsp70 ATPase domain	0.09725	-0.09725	0.30905	0.21355	0.2129	-0.01151	0.4862	0.36133	0.07416	-0.07416	0.01115	0.01211	0.03035	0.09451	0.44759	0.4244	-0.05597	0.05597	-0.17533	0.03608	-0.19647	-0.00696	-0.1478	0.08508
I_928248	BARD1	BRCA1 associated RING domain 1, forms an E3 ligase complex with BRCA1, binds CSTF-50 to link mRNA polyadenylation to DNA repair and tumor suppression, may play a role in BRCA1 -mediated tumor suppression; gene mutation is associated with some tumors	-0.21546	0.21547	0.20829	0.23228	0.02758	0.02029	-0.28172	-0.43668	0.19865	-0.19866	0.1651	-0.12709	0.10717	-0.00139	-0.71608	-0.56681	0.0406	-0.0406	0.38702	0.50253	-0.1038	0.09619	-0.8745	-0.75261
I_962422	BAX	BCL2 associated X protein, induces apoptosis by altering mitochondrial membrane permeability resulting in cytochrome c release and caspase activation, inhibited by BCL2 interaction; mutations in the corresponding gene are associated with colorectal ...	0.0128	-0.01281	0.1149	-0.06256	0.09718	0.0804	0.1337	0.06357	0.02408	-0.02409	-0.02537	-0.0099	0.03605	0.18406	0.33398	0.37204	-0.00951	0.00952	-0.05203	-0.02567	0.08285	0.24894	0.57686	0.50192
I_939269	BAZ2B	Bromodomain adjacent to zinc finger domain 2B, a putative component of chromatin remodeling complexes which contains a carboxy terminal bromodomain, an adjacent PHD finger, and a WACZ motif, may be involved in chromatin remodeling	-0.00225	0.00225	-0.28568	-0.58035	0.10681	-0.32825	0.44647	-0.13897	0.01923	-0.01923	-0.49857	-0.62903	-0.32196	-0.30303	-0.26404	0.11605	-0.06093	0.06093	-0.43545	-0.22874	-0.32072	0.09822	-0.18	0.1531
I_959921	BBS2	Bardet-Biedl syndrome 2; mutation of the corresponding gene contributes to the autosomal recessive disorder Bardet Biedl syndrome, characterized by obesity, pigmented retinopathy, polydactyly, hypogenitalism, mental retardation, and renal anomalies	0.07305	-0.07305	-0.13987	-0.25361	-0.09091	-0.18743	0.51669	0.23013	0.13587	-0.13587	-0.16161	-0.13109	0.05796	-0.06686	0.04965	0.24733	-0.06512	0.06512	-0.13389	0.02172	-0.02913	0.26138	0.27776	0.51276
I_957834	BCKDHB	Branched chain alpha keto acid dehydrogenase E1 beta subunit, a component of the enzyme complex that regulates branched chain keto acid catabolism, deficiency is a cause of maple syrup urine disease	0.04452	-0.04451	0.09646	0.01673	-0.09786	-0.13093	0.32938	0.28198	0.03761	-0.0376	0.07651	0.01137	-0.03376	0.13813	0.17698	0.05259	0.05121	-0.05121	-0.28345	-0.12648	-0.17722	-0.06734	0.41054	0.58824
I_958548	BCL11B	B-cell lymphoma/leukemia 11B (COUP TF-interacting protein 2), contains C2H2 zinc fingers, interacts specifically with COUP-TF family members and is implicated in COUP-TF-mediated transcriptional repression; may be translocated in T cell leukemia	0.05687	-0.05687	-0.83297	-0.27748	-0.03793	0.04912	-0.24734	-0.0879	0.15179	-0.1518	-0.4529	-0.51531	0.18705	-0.05735	-0.28695	0.06396	0.16666	-0.16666	-0.90534	-0.31267	0.12792	-0.14765	-0.83599	-1.24857
I_1109147	BCL2L12	BCL2-like 12 (proline rich), member of the Bcl-2 family, contains a BH2 domain and several small proline-rich motifs (PXXP), predicted to interact with other proteins and to modulate apoptosis	0.02315	-0.02316	0.10212	0.14276	0.12102	-0.04192	-0.57019	-0.59839	0.16815	-0.16815	-0.01659	0.01247	0.01751	-0.15622	-0.07983	0.11639	-0.13172	0.13172	0.14807	0.20858	0.08741	0.15684	-0.74847	-0.6602
I_944099	BCL6	B-cell CLL-lymphoma 6, transcriptional repressor that inhibits senescence, recruits corepressors and HDAC complexes, involved in B cell differentiation and germinal center formation, deregulated expression is associated with non-Hodgkins lymphomas	-0.1572	0.1572	-0.05497	-0.05585	0.11875	0.19639	0.59452	0.59472	0.07543	-0.07543	-0.38114	-0.58226	0.0311	-0.20013	0.33339	0.38878	0.12487	-0.12486	-0.57393	-0.51962	-0.1309	-0.13716	0.01198	0.35011
I_958707	BDKRB1	Bradykinin receptor B1, a G protein-coupled receptor, mediates intracellular calcium flux, serves in inflammatory processes, nociception, and vasoconstriction, increased expression may be associated with ischemia, arthritis and kidney disease	-0.13444	0.13444	0.44689	0.4223	-0.02752	0.04896	-0.2721	0.12722	0.01025	-0.01025	0.33432	0.31304	-0.17583	0.03441	-0.40748	-0.36632	0.01267	-0.01267	-0.06211	-0.26371	0.03907	-0.20414	0.76634	0.3068
I_943988	BHLHB2	Differentiated embryo chondrocyte 1, a basic helix-loop-helix protein that represses transcription, plays a role in G1-S transition, may function in skeletal development and in TGFbeta receptor signaling pathways	-0.18098	0.18098	1.01944	1.09819	-0.41969	-0.12223	0.33505	0.32552	0.28592	-0.28593	0.48413	0.43871	0.13015	-0.67368	-0.01989	0.53281	0.00757	-0.00757	0.71626	0.65218	-0.05279	0.08047	-0.20441	-0.11874
I_930290	BIRC2	Apoptosis inhibitor 1, ubiquitin protein ligase and apoptosis inhibitor, may inhibit apoptosis by binding to TRAF1 and TRAF2 and preventing the activation of ICE-like proteases; corresponding gene may be amplified in esophageal squamous cell carcinomas	-0.09198	0.09198	0.12571	0.27533	-0.11025	0.04094	-0.07655	-0.01694	0.32003	-0.32003	-0.05225	-0.25234	-0.09685	-0.34247	-0.84279	-0.84718	-0.06389	0.06388	-0.07801	-0.03978	-0.44719	-0.20836	-0.57473	-0.4338
I_960986	BIRC5	Survivin, a member of the inhibitor of apoptosis protein family that is involved in G2-M transition and exit of the mitotic cell cycle; may play a role in oncogenesis	-0.03179	0.03179	-0.11871	0.13993	-0.05606	0.04611	-0.93873	-0.78495	0.39845	-0.39845	0.16478	-0.1807	-0.07045	-0.33577	-0.03026	-0.05824	-0.11249	0.11248	0.066	0.20617	-0.05824	0.32089	-1.46829	-1.35495
I_960177	BLM	Bloom syndrome protein, a 3-5 DNA helicase and ATPase involved in maintaining genome stability during DNA replication and recombination, acts in DNA repair; gene mutations cause Bloom syndrome and may play a role in acute promyelocytic leukemia	-0.1528	0.1528	-0.64136	-0.21467	-0.23744	-0.03596	-0.39725	-0.50195	0.0645	-0.0645	-0.43257	-0.52962	-0.37782	-0.05445	-0.82545	-1.09317	0.07538	-0.07539	0.31925	0.04051	0.08307	0.00564	-0.93832	-1.09011
I_929916	BM-009	Hypothetical protein BM-009, a protein overexpressed in PC3 prostate cancer cells, may function in prostate cancer progression	-0.08473	0.08473	0.04075	-0.04259	-0.09543	-0.01836	0.15559	-0.17509	0.08828	-0.08828	-0.24862	0.05335	-0.24564	-0.23639	-0.38288	-0.46403	0.14394	-0.14394	-0.44539	-0.10317	-0.31026	-0.09543	-0.7137	-0.86895
I_958639	BM039	Protein of unknown function	-0.02979	0.02978	0.07678	0.17343	0.02679	0.03813	-0.41896	-0.35774	0.16794	-0.16794	-0.17339	-0.20203	-0.21396	-0.44843	-0.65557	-0.6902	-0.02487	0.02487	-0.1838	-0.06354	-0.16778	0.02455	-1.05708	-1.01459
I_964171	BNC	Basonuclin, a keratinocyte zinc-finger protein, may play a role in the maintenance of proliferative capacity and prevention of terminal differentiation, binds to ribosomal DNA, may act as a tissue-specific transcription factor for ribosomal RNA genes	0.08031	-0.08031	2.17887	1.53846	0.08349	0.39823	1.0678	1.21726	0.18134	-0.18134	0.68367	0.67346	0.27997	0.40334	0.35567	-0.04959	-0.19006	0.19007	-0.20771	0.54194	-0.23775	-0.07445	0.28185	-0.01957
I_963591	BOP1	Block of proliferation 1, has four WD40 repeats and PEST sequences, which likely mediate protein-protein interactions, has strong similarity to mouse Bop1, which is a protein involved in 28S and 5.8S rRNA processing and large ribosomal subunit biogenesis	-0.05414	0.05414	-0.08933	0.06189	-0.10123	0.10217	-0.8237	-0.45089	-0.17035	0.17034	-0.01563	0.13315	-0.05621	-0.04008	-0.4064	-0.19964	0.02341	-0.02341	0.39736	-0.15818	0.33114	-0.21307	-0.05021	-0.4517
I_1152157	BRI3BP	BRI3 binding protein, interacts with brain protein I3 (BRI3)	-0.08026	0.08026	-0.25814	-0.19743	0.0088	-0.25357	-0.63032	-0.80338	-0.11367	0.11367	-0.22131	-0.2492	-0.06309	-0.19408	-0.6958	-0.23188	-0.02287	0.02288	0.22634	-0.02853	0.00876	0.03736	0.05174	-0.08586
I_957252	BRIX	Protein with high similarity to S. cerevisiae Brx1p, which is a nucleolar protein required for maturation of rRNA components of the 60S ribosomal subunit, contains one Brix domain	-0.01498	0.01498	-0.11995	0.16421	-0.23833	0.02327	-0.20052	-0.00402	0.13611	-0.1361	0.15411	0.10232	-0.08056	-0.12782	-0.35378	-0.39821	0.13891	-0.13891	0.07171	0.09318	0.0527	0.03417	-0.46374	-0.5455
I_966114	BST1	Bone marrow stromal cell antigen 1, a member of the CD38 family of cyclic ADP ribose generating cyclases, supports early B and T cell growth; corresponding gene is upregulated in rheumatoid arthritis patient-derived bone marrow stromal cell lines	-0.05462	0.05462	1.44921	0.68115	0.43889	0.1198	1.05153	1.23718	0.04856	-0.04855	0.63793	0.3598	0.48765	0.4699	1.17509	0.43982	-0.15754	0.15754	-0.55085	-0.06972	-0.65222	-0.07197	-0.24862	0.29549
I_960914	BST2	Bone marrow stromal antigen 2, a cell surface antigen that may play a role in proliferation and cell-cell communication, likely to be involved in humoral defense; elevated levels are associated with myeloma	-0.24484	0.24483	-0.73122	-0.3941	-0.54838	-0.03212	-1.01869	-0.67089	0.00118	-0.00118	-0.24813	-0.29967	-0.03705	-0.20002	-0.24361	-0.33049	0.1977	-0.19769	-0.07223	-0.31408	-0.06157	-0.40074	-0.53817	-0.94885
I_966779	BTF	Bcl-2-associated transcription factor, a transcriptional repressor that interacts with Bcl2-related proteins, mediates the induction of apoptosis, inhibits cell transformation by E1A; corresponding gene is mapped to a region deleted in some cancers	-0.11969	0.11969	0.48326	0.55453	0.24866	0.12102	-0.06142	0.02156	0.29628	-0.29627	-0.09621	-0.33561	-0.10813	-0.18812	-0.36479	-0.33628	-0.01767	0.01767	0.18246	0.32139	0.03098	0.28287	-0.3906	-0.19921
I_932023	BTG1	B-cell translocation gene 1, antiproliferative factor and transcription coactivator that interacts with homeodomain protein HOXB9 and CCR4-associated factor 1 (CNOT7); chromosomal translocation of the corresponding gene is seen in B cell leukemias	0.12819	-0.12819	-0.03851	-0.35038	0.00037	-0.09701	0.87363	0.71861	0.28085	-0.28085	-0.20448	-0.02894	0.00894	-0.05984	0.1101	0.41332	0.16258	-0.16258	-0.19549	0.21284	-0.00595	0.46433	-0.34473	0.07409
I_965088	BUB1	Budding uninhibited by benzimidazoles 1 homolog, a spindle assembly checkpoint protein that may sense kinetochore tension; mutations are associated with lung cancer, adult T cell leukemia, and chromosome instability in colorectal cancer cell lines	-0.05761	0.05761	0.26162	0.22919	0.16009	0.05911	-0.39744	-0.8149	0.17136	-0.17136	0.169	0.22945	0.13016	0.03396	0.1779	0.2751	-0.02325	0.02325	0.315	0.44622	0.05063	0.32067	-1.48182	-1.21275
I_931975	C10orf3	Protein of unknown function, has high similarity to uncharacterized mouse 1200008O12Rik	0.13683	-0.13683	0.44394	0.72887	0.20037	0.48019	-0.3349	-0.18532	-0.04251	0.04251	0.55605	0.7523	0.15666	0.15854	-0.06329	-0.12095	0.15199	-0.15199	0.10163	-0.07223	-0.05791	-0.28039	-1.57492	-1.5408
I_931793	C12orf2	Chromosome 12 open reading frame 2; a chromosomal translocation of the corresponding gene and the FBLN1 gene occurs in patients with a complex type of synpolydactyly	-0.07242	0.07242	0.80349	0.77178	0.50306	0.43728	0.10579	0.47537	0.03936	-0.03935	0.09072	0.09816	0.32054	0.14443	0.55622	0.34644	-0.14665	0.14664	0.36394	0.26275	0.33042	0.25003	0.61435	0.54277
I_958756	C14orf106	Protein of unknown function	-0.08428	0.08428	0.24029	0.27979	0.1172	0.14806	-0.15061	-0.27294	0.2407	-0.2407	-0.08265	-0.22698	-0.02961	-0.08739	-0.36115	-0.23246	-0.10146	0.10146	0.30121	0.42676	0.21198	0.29967	-0.73557	-0.71359
I_958817	C14orf130	Protein containing a putative zinc finger in N-recognin domain, has low similarity to uncharacterized C. elegans T22C1.1	0.09641	-0.09641	0.16748	0.13206	-0.20203	0.05149	-0.44761	-0.54183	0.13934	-0.13935	0.14034	-0.15563	0.04253	0.00786	-0.6149	-0.48176	-0.01378	0.01378	-0.12974	0.31496	0.15528	0.1588	-0.32559	-0.2562
I_958705	C14orf132	Protein of unknown function	0.07631	-0.07631	0.08015	-0.77258	-0.00511	-0.23635	0.7226	0.38644	-0.05965	0.05965	0.01399	0.45469	0.05456	0.05242	-0.4817	-0.64868	-0.13976	0.13976	-0.48431	-0.37744	-0.43266	-0.06989	0.0375	0.47018
I_960281	C18orf1	Protein with high similarity to Nedd4 WW-binding protein 4 (mouse N4wbp4), which interacst with the WW domains of the ubiquitin-protein ligase Nedd4	-0.05657	0.05657	-0.73597	-0.30461	-0.5372	-0.21262	-0.66419	-0.00978	0.09971	-0.09971	-0.17259	-0.515	-0.05147	-0.24203	-0.25293	-0.43743	0.19533	-0.19533	-0.33194	-0.27403	-0.2279	-0.18701	-0.98712	-1.30194
I_941917	C1orf33	Member of the ribosomal L10 family, which are part of the large ribosomal subunit, has moderate similarity to S. cerevisiae Mrt4p, which is involved in mRNA turnover	-0.08918	0.08918	0.1255	0.2012	0.30381	0.37753	-0.40151	-0.21996	0.24164	-0.24164	0.03327	0.04442	0.014	-0.16634	-0.40522	-0.43697	0.10019	-0.10018	-0.18581	-0.0028	-0.19046	-0.07926	-0.66923	-0.58817
I_936464	C1S	Complement component 1 (s subcomponent), serine protease involved in activation of the classical complement cascade, cleaves components C2 and C4; mutation of corresponding gene is associated with a lupus erythematosus-like syndrome and severe infections	-0.05888	0.05888	0.01727	0.01378	-0.18939	-0.25358	0.57982	0.6136	0.08459	-0.08459	-0.11361	-0.07581	0.14032	0.17772	0.71878	0.81851	-0.13194	0.13194	-0.50841	-0.71058	-0.34462	-0.48571	0.04994	0.03963
I_960972	C20orf1	Proliferation-associated nuclear protein, a nuclear protein that associates with the spindle pole and mitotic spindle during mitosis, may play a role in lung tissue development or growth, may be useful as a biological marker for prognosis of cancer	-0.07219	0.07218	-0.04933	0.29454	0.03069	0.29581	-0.65662	-0.17679	-0.04478	0.04478	0.30252	0.25811	0.13179	0.11733	0.19012	0.31984	0.09937	-0.09937	0.48236	-0.0216	0.35034	0.1893	-0.40215	-0.93193
I_961590	C20orf154	Member of the MCM family of DNA-dependent ATPases, which are involved in DNA replication, has low similarity to mini chromosome maintenance deficient 2 (mouse Mcmd2), which is a chromatin-binding protein that binds histone H3	0.01287	-0.01287	0.06669	0.16159	-0.14717	-0.06872	-0.37246	-0.29628	0.2224	-0.2224	0.02861	-0.40484	-0.0082	-0.02922	-0.91098	-0.74995	0.01508	-0.01507	0.06009	0.26986	0.03789	0.13231	-0.71542	-0.47501
I_963911	C20orf172	Protein of unknown function	0.05688	-0.05688	0.17876	-0.28859	0.00771	-0.11255	-0.32286	-0.75467	0.0493	-0.0493	-0.17082	-0.1471	-0.15199	0.0254	-1.37878	-0.87183	-0.07206	0.07206	0.13915	0.3228	0.15642	0.31947	-0.51872	-0.48592
I_961937	C20orf19	Protein of unknown function	-0.10481	0.10481	-0.04139	-0.01731	-0.05258	-0.05058	0.84615	0.66653	0.15559	-0.15559	-0.18797	-0.35914	-0.03737	-0.33209	0.30297	0.33405	-0.09016	0.09016	-0.06719	-0.00329	-0.22569	0.11319	0.07279	0.17965
I_961706	C20orf24	Protein of unknown function, has moderate similarity to uncharacterized C. elegans F44E7.9	0.00345	-0.00345	0.02469	0.0237	-0.01983	-0.09797	-0.13055	-0.22422	-0.02282	0.02282	-0.04327	-0.06689	-0.10218	0.17526	-0.33144	-0.38258	0.02753	-0.02753	0.16235	0.04302	-0.16889	-0.02674	-0.47824	-0.51467
I_960943	C20orf39	Protein of unknown function, has high similarity to uncharacterized human C20orf39	0.62787	-0.62787	-1.28984	-1.58543	-1.17137	-0.54908	-1.34784	-0.81326	0.0504	-0.05041	-1.49823	-1.07771	-0.68017	-0.88662	-0.73232	-0.78802	0.14992	-0.14992	-0.82457	-0.06304	-0.12473	0.04185	-0.49039	-0.78179
I_961961	C20orf97	Protein with high similarity to neuronal cell death Inducible Putative Kinase (rat LOC246273), which is a kinase-like protein induced by deprivation of Ngf or exposure to calcium ionophore, contains a protein kinase domain	-0.05373	0.05373	-0.01358	0.05834	-0.14267	-0.10236	0.45586	0.41874	0.20722	-0.20722	0.04462	0.17273	0.08062	-0.09317	0.47145	0.45293	0.01143	-0.01143	-0.15015	0.00189	-0.30468	-0.03701	-0.12025	-0.22106
I_962186	C21orf5	Member of the Dopey N-terminal domain containing family, has weak similarity to C. elegans PAD-1, which is involved in embryonic development	0.14652	-0.14652	0.48209	0.59246	0.10736	0.51235	-0.21154	0.66631	-0.08637	0.08637	0.65317	0.7474	0.26586	0.45162	0.21364	0.38261	0.12129	-0.12129	0.15163	-0.41337	0.01217	-0.50627	0.32757	-0.06826
I_960918	C22orf20	Member of the palatin family, which are storage proteins that may also catalyze the cleavage of fatty acids from membrane lipids, has high similarity to uncharacterized adiponutrin (mouse Adpn)	0.00402	-0.00402	-0.0122	-0.00351	0.17628	-0.10727	0.47916	0.11498	-0.12678	0.12678	-0.12466	-0.12017	-0.10399	-0.10212	0.14369	0.26936	0.02536	-0.02535	0.12055	0.08219	0.02571	0.19994	0.93502	1.11143
I_936463	C2F	Protein of unknown function, has high similarity to a region of S. cerevisiae Emg1p, which is a protein with a role in 40S ribosome biogenesis and 18S rRNA maturation	-0.03378	0.03377	0.03374	0.03823	-0.04355	-0.02177	-0.04576	-0.04805	0.19289	-0.19289	-0.05204	-0.12991	-0.16925	-0.21965	-0.46006	-0.53131	0.00622	-0.00622	-0.16869	0.03142	-0.29176	-0.05136	-0.78289	-0.71727
I_947168	C2orf7	Protein containing a PA (protease associated) domain	-0.10828	0.10828	0.3117	0.3576	0.15058	-0.05313	-0.13255	-0.21619	-0.05021	0.05021	0.19421	-0.12216	0.20702	0.19578	-0.52496	-0.68906	-0.08841	0.08841	-0.03201	-0.01747	0.11379	-0.03792	0.14443	0.52091
I_957211	C6orf4	Chromosome 6 open reading frame 4, a predicted adaptor protein, activates the inhibitor of kappa kinase and is involved in apoptosis inhibition	-0.09591	0.09592	0.45557	0.33378	-0.04761	-0.13325	0.60895	0.40446	-0.04894	0.04894	0.29683	-0.41959	-0.21143	-0.17533	0.77934	0.36734	-0.33992	0.33992	0.38399	0.20412	-0.07152	0.06356	0.78988	1.36936
I_934412	CARS	Cysteinyl-tRNA synthetase, aminoacylates cognate tRNA with cysteine for protein biosynthesis, interacts with elongation factor 1 gamma (EEF1G), exists as multiple alternative forms	0.00865	-0.00864	0.75254	0.2682	0.24911	0.05238	0.3911	0.23074	-0.05966	0.05966	0.19899	0.07512	0.03452	0.19153	0.39613	0.3705	0.00644	-0.00643	0.12445	0.19529	-0.07187	0.29671	0.3144	0.61964
I_930182	CASP1	Caspase 1 (interleukin-1 beta converting enzyme), a cysteine (thiol) protease that activates interleukin-1 beta (IL1B) and stimulates apoptosis, as well as having roles in inflammation	-0.03959	0.03959	-0.49604	-0.14956	-0.12732	0.03517	0.37273	0.17487	0.09604	-0.09604	-0.07056	-0.16618	-0.12787	-0.26127	0.41877	0.15878	-0.00863	0.00863	0.14758	0.00242	-0.01134	0.16526	0.53243	0.77463
I_930189	CAV1	Caveolin 1, a structural component of caveolar membranes, involved in signal transduction, integrin receptor signaling and cholesterol transport, acts as a tumor suppressor and has altered expression in psoriasis and Niemann Pick disease	-0.03338	0.03338	0.10713	0.13399	0.08715	-0.01249	-0.00936	0.08749	0.15047	-0.15048	-0.20618	-0.46613	-0.01107	0.20058	0.38372	0.15827	-0.02824	0.02824	-0.32398	-0.16701	-0.19759	0.04419	0.28174	0.3103
I_930188	CAV2	Caveolin 2, a member of the caveolin family, promotes caveolae biogenesis induced by caveolin 1 (CAV1), may also be involved in signal transduction; gene maps to a region frequently deleted in human cancers	0.13321	-0.13321	0.52797	0.54969	0.02362	0.13623	-0.07429	0.38203	-0.00665	0.00665	0.60385	0.76433	0.38712	0.44512	0.19419	-0.15236	0.05089	-0.05088	-0.14479	-0.19766	-0.13901	-0.25901	0.07733	0.1425
I_962185	CBR3	Carbonyl reductase 3, an aldoketoreductase that catalyzes the reduction of carbonyl compounds to their corresponding alcohols	0.06686	-0.06686	0.2735	0.15169	0.069	-0.14879	-0.22007	-0.35492	0.0599	-0.05991	0.04839	0.04522	-0.08582	-0.05556	-0.52217	-0.45717	-0.08124	0.08124	0.07978	0.16872	-0.1422	0.06165	-0.37549	-0.19492
I_1151902	CBX7	Protein containing a Chromo domain, which bind chromatin, has moderate similarity to a region of chromobox homolog 4 Drosophila Pc class (human CBX4), which is a component of the HPC-HPH Polycomb group complex and functions as a transcriptional repressor	-0.05419	0.05419	-0.34114	-0.24374	0.01335	-0.17861	0.39099	0.073	0.06424	-0.06424	-0.16652	-0.304	0.05362	-0.0046	0.31783	0.27885	-0.12093	0.12093	0.20267	0.27419	0.02358	0.47824	0.30846	0.20782
I_958486	CCNB1	Cyclin B1, regulatory subunit of the CCNB1 - CDC2 maturation-promoting factor complex that mediates G2-M phase transition, involved in apoptosis, overexpressed in breast, lung, colorectal carcinoma, lymphoma, leukemia, overexpression induces tetraploidy	-0.07894	0.07894	0.21757	0.35818	0.21512	0.32361	-0.52344	-0.40015	0.14775	-0.14774	0.57881	0.67031	0.2232	0.06174	0.47419	0.75074	-0.01226	0.01226	0.20791	0.07262	0.2196	0.12014	-1.34847	-1.5795
I_959997	CCNB2	Cyclin B2, a CDC2 kinase-associated cyclin that is involved in Golgi apparatus disassembly, may function in p53 (TP53) -mediated cell cycle arrest at the G2/M transition, may mediate cell cycle arrest by linking CDC2 with TGFbeta type II receptor ...	-0.14316	0.14315	-0.00485	0.35932	0.03022	0.30954	-0.68755	-0.40108	0.25588	-0.25587	0.22785	0.11584	0.0233	-0.05182	0.26286	0.13584	0.06047	-0.06047	0.07591	-0.0049	0.17904	0.07615	-1.33084	-1.41664
I_957818	CCNG1	Cyclin G, a p53 (TP53) regulated member of the cyclin family of CDK regulatory subunits, activated in response to DNA damage and is involved in regulation of cell proliferation, upregulated in breast and prostate cancer	0.0002	-0.0002	-0.14465	-0.07337	-0.11235	0.03016	0.35497	0.36589	0.09078	-0.09078	-0.09154	-0.39719	0.06338	-0.01357	0.50175	0.48682	0.04568	-0.04568	-0.38764	0.06008	0.27319	0.2993	0.3415	0.31384
I_966665	CCRL1AP	Protein of unknown function	-0.0618	0.06181	-0.64679	-0.33209	-0.12471	-0.04646	0.17483	0.06321	0.03831	-0.03831	-0.31993	-0.42958	-0.07169	-0.08953	-0.0515	-0.08423	0.03458	-0.03458	-0.01552	-0.08487	-0.04656	0.03461	-0.21054	-0.32121
I_956897	CCRL2	Chemokine (C-C motif) receptor-like 2, member of the G protein-coupled receptor family, a putative chemokine receptor upregulated upon neutrophil activation and differentiation of monocytes to macrophages, may act in inflammation and immune response	0.30322	-0.30322	-1.0529	-0.80658	-0.31074	-0.26241	-0.2599	-0.60499	0.19531	-0.19532	-1.22664	-0.46257	0.02086	-0.03911	-0.59996	-0.674	0.19063	-0.19063	0.04291	-0.09091	0.33033	-0.17853	0.1467	1.58816
I_1002050	CCS	Copper chaperone for superoxide dismutase, a metallochaperone that donates copper to Cu/Zn superoxide dismutase (SOD1), may be useful for development of therapeutic approaches for SOD1-associated pathologies like amyotrophic lateral sclerosis	-0.03254	0.03253	-0.14566	-0.19775	0.00569	-0.04256	-0.02346	0.00931	-0.01686	0.01686	-0.17952	-0.13755	-0.00642	-0.06696	0.23536	0.16196	-0.00678	0.00679	-0.02539	-0.09755	0.07395	0.10342	0.56854	0.6585
I_958196	CCT5	Chaperonin containing T-complex 1 subunit 5 (epsilon), part of a cytosolic hexadecamer structure involved in ATP-dependent folding of actin, tubulin and other proteins, binds Epstein-Barr Virus-encoded EBNA3 and may mediate its initial folding	-0.06475	0.06476	0.22652	0.0711	0.06635	-0.02327	-0.13496	-0.39089	0.04118	-0.04118	0.13208	-0.00012	-0.10054	0.29566	-0.34309	-0.47707	-0.03575	0.03576	0.18374	0.10533	-0.24115	0.05352	-0.77185	-0.73573
I_1221959	CCT6A	Chaperonin containing T-complex 1 subunit 6A (zeta), part of a cytosolic hexadecamer structure involved in ATP-dependent folding of actin, tubulin and other proteins, decreased activity may result in misfolded tubulin aggregates in Alzheimers disease	0.03024	-0.03024	0.18335	0.01017	0.06231	-0.03047	0.01549	-0.13978	0.03441	-0.03441	0.00194	0.09704	-0.18438	-0.01711	-0.51431	-0.48538	0.00139	-0.00138	0.10897	0.15924	-0.05841	0.14182	-0.38609	-0.37449
I_966749	CD109	CD109 antigen, a member of the alpha2M/C3, C4, C5 superfamily of thioester-containing proteins with possible roles in binding carbohydrate or protein ligands; polymorphisms in the gene determine the Gov antigen system, which affects platelet transfusion	0.14432	-0.14432	0.33366	0.01121	0.13276	-0.15031	0.49752	0.38523	-0.09777	0.09778	0.34236	0.16828	0.24014	0.14073	0.37292	0.4836	-0.15854	0.15854	0.08759	-0.09789	-0.37171	-0.05849	0.27666	0.80564
I_932214	CD3D	CD3 antigen delta polypeptide, delta subunit of the CD3 (T3) T-cell receptor complex, involved in T cell signaling and activation	-0.05038	0.05038	-0.26439	-0.6297	-0.083	-0.33857	-1.05839	-0.53386	0.27921	-0.27922	-0.44537	-0.71979	-0.48013	-0.32264	-0.13149	-0.10631	0.2353	-0.2353	-0.85486	-0.05684	-0.21332	-0.03811	-0.70181	-0.55865
I_931894	CD3G	Gamma subunit of the CD3 (T3)-T cell receptor complex, involved in T cell activation and differentiation, controls ligand-induced CD3-TCR complex assembly, down modulation, and recycling; loss of expression is associated with HIV infection	-0.10947	0.10947	-0.5194	0.08353	-0.16357	-0.11348	-1.05537	-1.69033	0.04514	-0.04514	-0.68867	-0.25252	-0.24355	-0.59821	-0.46678	-0.04309	0.15435	-0.15435	-0.27463	0.11333	0.54723	0.05088	-0.40148	-0.63631
I_929804	CD3Z	T-cell receptor zeta chain, involved in T-cell activation through signal transduction via the T-cell receptor complex; reduced expression in T cells is associated with several types of cancers and systemic lupus erythematosus	0.03342	-0.03342	-2.17831	1.18639	-0.65196	-2.14479	2.42312	2.42312	0.04946	-0.04946	-2.43062	-0.9696	-0.87141	-1.35711	0.48171	1.42365	1.83586	-1.83586	-0.07829	-2.36658	-2.84306	-2.75943	-3.05446	-1.5635
I_933293	CDC2	Cell division cycle 2, cyclin-dependent protein kinase that binds B-type cyclins, regulates entry of mitosis and G2 to M-phase transition, promotes cell proliferation; implicated in Alzheimers disease through phosphorylation of amyloid beta and nucleolin	-0.0055	0.0055	0.40715	0.37483	0.47648	0.40852	-0.38164	-0.52033	-0.01743	0.01743	-0.18582	-0.13325	0.08519	0.25854	-0.07199	-0.04071	0.03997	-0.03997	0.54957	0.55874	0.40058	0.49529	-1.03095	-1.11909
I_931677	CDC20	Cell division cycle 20, seven WD repeat protein that is essential for cell division, interacts with and activates the mitotically phosphorylated form of the anaphase promoting complex, involved in mitotic spindle checkpoint activation	-0.31449	0.3145	-0.02579	0.58891	0.04853	0.40868	-0.907	-0.45149	0.22151	-0.22151	0.34183	0.15025	0.14217	-0.00666	0.56865	0.30683	0.10456	-0.10456	0.29105	-0.0514	0.22679	-0.02458	-1.27018	-1.48136
I_958517	CDC25C	Cell division cycle 25C, CDC25 family member, dephosphorylates and activates p34cdc2 (CDC2) -cyclin B complex to induce entry into mitosis, binds 14-3-3 proteins in a Ser-216 phosphorylation-dependent manner, acts in DNA damage and replication ...	-0.16695	0.16695	-0.09549	0.0221	0.15733	0.13229	-0.38783	-0.20178	-0.01326	0.01326	0.06325	0.0965	-0.06373	-0.16668	0.16246	0.02963	0.01839	-0.01839	0.43229	0.37011	0.14243	0.06287	-0.79284	-1.05071
I_1110320	CDC42EP2	CDC42-effector protein 2, a Rho GTPase-interacting protein of the Borg (binders of Rho GTPases) protein family, involved in actin filament assembly, regulation of cell shape, and the induction of pseudopodia formation, may function in cell migration	-0.08518	0.08519	0.62665	0.4052	-0.00552	-0.24781	0.26318	0.34674	-0.16117	0.16117	0.12851	-0.07476	0.30519	0.22805	0.75387	0.21138	-0.28148	0.28148	-0.07135	0.22046	0.22664	0.02184	0.82386	0.88428
I_961013	CDC45L	Cell division cycle 45 like, associates with ORC2L, MCM7, and POLA2, predicted to be involved in the initiation of DNA replication; corresponding gene is located in a chromosomal region frequently deleted in DiGeorge syndrome	-0.09272	0.09271	-0.20753	0.04197	-0.0384	0.04041	-0.5277	-0.47856	0.1386	-0.1386	-0.37929	-0.27129	-0.12275	-0.18233	-1.48291	-1.32104	0.08117	-0.08117	0.32447	0.38677	0.09504	0.09385	-0.97143	-1.36605
I_961317	CDC6	CDC6 (cell division cycle 6) S. cerevisiae homolog, contains a leucine zipper motif and destruction box motifs, involved in DNA replication initiation, may regulate DNA licensing, pre-replicative complex formation and cell proliferation	0.06863	-0.06862	-0.03523	-0.05102	0.1385	-0.24842	-0.50576	-0.69962	-0.11279	0.11279	0.34516	-0.01467	0.2321	-0.03807	-1.70858	-1.11915	0.06553	-0.06553	0.13051	0.27819	-0.21667	0.01765	-0.9896	-0.69165
I_1100067	CDC7L1	Cell division cycle 7-like 1, a serine/threonine kinase involved in the regulation of DNA replication, phosphorylates histones and MCM proteins involved in DNA replication; overexpression is seen in certain tumors	0.0495	-0.0495	-0.28332	-0.21142	-0.02173	-0.09673	-0.09416	-0.30958	0.07291	-0.07291	-0.20246	-0.05141	0.04413	-0.23798	-0.77482	-0.40041	-0.03822	0.03822	0.02916	0.08161	0.01494	0.04612	-0.7932	-0.73339
I_942438	CDCA1	Cell division cycle associated 1, putative centromeric protein predicted to be involved in chromosome segregation and the spindle checkpoint	-0.00136	0.00136	0.50552	0.2743	0.2096	0.14091	-0.50615	-0.56527	0.19029	-0.19029	0.13461	0.21244	0.09642	0.01188	-0.06926	0.03775	-0.03518	0.03518	0.36283	0.5606	0.14067	0.35297	-1.68401	-1.52777
I_928296	CDCA7	Cell division cycle associated 7, a nuclear protein most highly expressed in thymus and small intestine that may act, along with MYC, in regulating cell-matrix adhesion	-0.20331	0.20331	0.00623	-0.02314	-0.37612	-0.02007	0.07243	-0.32034	-0.11849	0.11849	0.50276	0.57276	-0.0462	-0.16124	-1.08751	-1.2804	0.057	-0.05701	-0.33198	-0.39099	-0.65861	-0.70512	-1.89859	-2.01872
I_957026	CDH6	Cadherin 6 (K-cadherin), a calcium-dependent glycoprotein that mediates cell-cell interactions, may be involved in endometrial and placental development and in endometrial cancer and small cell lung cancer	0.21937	-0.21937	0.84055	1.68216	0.40192	0.45397	0.84367	0.79796	-0.34939	0.34939	0.37759	0.62301	0.40424	0.53337	0.42559	0.67122	-0.11198	0.11198	0.4785	0.08353	0.66686	-0.05979	1.2469	0.41629
I_932344	CDK2	Cyclin-dependent protein kinase 2, interacts with cyclins to regulate kinase activity and cell cycle progression, regulates DNA replication, activates histone gene transcription, abnormal regulation is implicated in various cancers	0.03702	-0.03702	-0.07069	-0.06489	0.06884	-0.08226	-0.37415	-0.49321	-0.15225	0.15225	-0.2061	-0.16601	-0.2386	-0.05397	-0.48675	-0.35378	0.0342	-0.03421	0.1845	0.1259	0.00672	0.10627	-0.74613	-1.04247
I_957428	CDKN1A	Cyclin-dependent kinase inhibitor 1A (p21, CIP1, WAF1), induced by the p53 (TP53) tumor suppressor, involved in the DNA damage response and repair, cell cycle control, and apoptosis; implicated in several types of cancer and metastasis of colon carcinoma	0.00942	-0.00942	0.27965	0.49282	0.39723	0.31815	-0.12221	0.14454	0.13179	-0.13179	-0.08751	-0.03346	0.29468	0.37127	1.23822	1.12313	-0.3109	0.31089	0.54342	-0.05291	0.76933	0.50586	1.19856	1.30249
I_961235	CDKN2D	Cyclin-dependent kinase inhibitor 2D, binds and inhibits CDK4 and CDK6 kinase activity, negatively regulates cell proliferation; mutations of the corresponding gene are detected in osteosarcomas	0.03012	-0.03012	0.57886	0.38051	0.07175	-0.0258	0.06973	-0.16669	0.24532	-0.24532	-0.03618	-0.09414	-0.00781	-0.05236	-0.86207	-0.67703	-0.10918	0.10917	0.10097	0.37221	-0.29225	0.0488	-0.70789	-0.53793
I_959891	CDKN3	Cyclin-dependent kinase inhibitor 3 (cyclin-dependent kinase interactor 1), a tyrosine-serine phosphatase that interacts with cyclin-dependent kinases and inhibits progression through the cell cycle, dephosphorylates CDK2 monomer on Thr160	0.15191	-0.15191	0.30371	0.06418	0.23211	0.00349	-0.35508	-0.51101	-0.21228	0.21228	0.19801	0.45681	0.01889	0.37574	0.12674	0.08381	-0.07667	0.07667	-0.13155	-0.20738	0.06421	0.00816	-1.1703	-1.26123
I_1109276	CDT1	DNA replication factor (double parked), a putative chromatin licensing factor that is essential for DNA replication, interacts with the re-replication inhibitor geminin (GMNN) to ensure replication occurs once per cell cycle, may have oncogenic potential	0.04878	-0.04877	0.108	0.02119	-0.15475	-0.33275	-0.82849	-0.95152	0.05764	-0.05764	-0.11274	-0.09782	-0.19852	-0.27333	-1.11603	-0.72858	-0.06105	0.06105	0.41945	0.35951	-0.06421	0.06264	-1.05269	-0.96867
I_966800	CDYL	Chromodomain protein Y chromosome-like, a histone acetyltransferase that is involved in histone H4 hyperacetylation and the histone-to-protamine transition during spermatogenesis	0.17859	-0.17858	-0.02966	0.10598	-0.37189	-0.18528	-0.36162	-0.18979	0.14284	-0.14284	0.00322	-0.00304	0.04773	-0.31068	-0.28203	0.06585	0.13502	-0.13502	0.08607	0.12578	-0.24508	-0.05984	-0.83848	-0.62771
I_929950	CEBPD	CCAAT enhancer binding protein delta, a member of bZIP-domain CCAAT/enhancer binding family of transcription factors, dimerizes with C/EBP beta (CEBPB) and transcriptionally regulates genes involved in adipocyte differentiation and acute phase response	-0.11437	0.11437	-0.30614	0.08117	-0.19199	-0.11507	0.27863	0.40541	0.31395	-0.31395	-0.71872	-0.92265	0.02969	-0.20952	0.50686	0.36393	-0.10526	0.10526	-0.12215	-0.0535	0.2709	0.21354	0.59606	0.76853
I_959850	CEBPE	CEBP epsilon, a bZIP-domain CCAAT-enhancer binding protein that functions as both a transcriptional activator and repressor, regulates myeloid cell differentiation; gene mutations are associated with neutrophil-specific granule deficiency	0.30656	-0.30656	-0.07783	-0.37795	-0.45899	-0.41666	-0.22944	0.05005	0.09597	-0.09597	-0.3096	-0.60497	0.03042	-0.17979	0.6002	0.43579	0.06057	-0.06056	-0.22883	0.44023	0.15683	0.37363	0.478	1.16654
I_962624	CEBPG	CCAAT enhancer binding protein gamma, implicated in the regulation of genes involved in differentiation of various tissues and cell types, plays a role in the pathogenesis of AIDS dementia	-0.02094	0.02094	-0.36378	-0.30803	-0.00133	-0.04477	0.15354	0.2083	0.17967	-0.17967	-0.40433	-0.42169	-0.07301	-0.19362	0.06426	-0.05333	-0.01702	0.01702	-0.18173	0.06986	-0.20191	0.00064	-0.46354	-0.44573
I_928623	CENPA	Centromere protein A, a histone H3-like protein that is an essential component of centromeres, located in the inner kinetochore plate, serves as a major autoantigen in patients with certain systemic autoimmune diseases	0.08693	-0.08694	0.19786	-0.01661	0.22572	-0.05244	-0.35107	-0.50664	-0.17805	0.17805	0.07541	0.10433	-0.16679	0.11621	0.1192	0.26463	0.01666	-0.01666	0.28181	0.21317	0.04159	0.08234	-1.18443	-1.1146
I_940643	CENPF	Centromere protein F (350/400kD, mitosin), centromere-associated protein involved in kinetochore assembly and chromosome movement during mitosis, increased expression in breast cancers correlate with a decrease in the likelihood of disease-free survival	-0.16932	0.16932	0.20002	0.47928	0.1603	0.34833	-0.59887	-0.45088	0.47489	-0.47489	0.08089	-0.32203	0.00796	-0.317	0.3466	0.22131	-0.10293	0.10293	0.3816	0.52067	0.07098	0.45327	-1.65187	-1.53004
I_958479	CENPH	Kinetochore protein CENP-H, contains a predicted coiled-coil structure, a component of active kinetochores, interacts with MCK (KNSL6) and with itself, may play a role in mitotic chromosome segregation	-0.00803	0.00803	-0.41461	-0.28249	-0.21025	0.01708	-0.17244	-0.14962	-0.02823	0.02823	0.0187	-0.32148	-0.19944	-0.00723	-0.38007	-0.39539	0.00934	-0.00935	-0.09402	0.03255	0.192	0.06808	-0.41387	-0.68925
I_959064	CES2	Carboxylesterase 2 (intestine and liver), catalyzes the hydrolysis of the benzoyl group of cocaine and the acetyl group of heroin, mediates bioactivation of the anticancer prodrug irinotecan, may play a role in the degradation of heroin and cocaine	-0.00087	0.00087	-0.04694	-0.15104	0.10812	0.02792	0.08341	-0.09917	0.13717	-0.13717	-0.08037	-0.00768	0.0282	-0.03863	0.38897	0.53247	-0.08961	0.08961	0.01924	0.13618	0.21405	0.38355	0.45174	0.47627
I_961588	CGI-09	Member of the eukaryotic initiation factor 3, gamma subunit family, has weak similarity to S. cerevisiae Gcd10p, which is an RNA-binding subunit of initiation factor eIF3	0.01169	-0.01169	0.15147	0.09667	0.03291	-0.03477	0.12314	0.01196	0.03181	-0.0318	0.54893	0.30032	-0.10211	-0.16497	-0.15192	-0.07363	-0.03689	0.03689	0.0107	0.19466	-0.32894	-0.03106	-0.50804	-0.51112
I_929413	CGI-12	Protein containing a mitochondrial transcription termination factor (mTERF) domain	-0.01978	0.01979	-0.23725	-0.26621	-0.24032	-0.05817	0.1036	0.1029	0.22111	-0.22111	-0.04399	-0.05764	-0.1697	-0.28017	-0.47126	-0.3914	0.06989	-0.06989	-0.41278	-0.17774	-0.30858	-0.14979	-0.58999	-0.54963
I_947173	CGI-121	Protein of unknown function, has low similarity to uncharacterized C. elegans W03F8.4	0.0243	-0.0243	0.1503	0.07452	0.07453	-0.03334	-0.08794	-0.41022	0.12553	-0.12553	0.01912	0.02531	-0.15333	-0.05778	-0.59114	-0.48226	-0.11855	0.11855	-0.18243	-0.0622	-0.19628	-0.00448	-0.89694	-0.85111
I_928746	CGI-127	Member of the yippee putative zinc-binding protein family, has high similarity to uncharacterized human YPEL1	0.08707	-0.08707	0.5401	0.18219	0.12471	-0.06252	0.72532	0.65361	-0.25441	0.25441	0.37107	0.21883	0.13706	0.23131	0.3599	0.47113	-0.05279	0.05279	-0.1438	-0.10186	-0.26276	-0.11121	0.50309	0.43298
I_966834	CGI-19	Protein with low similarity to S. cerevisiae Hut1p, which is involved in native disulfide bond formation in the endoplasmic reticulum	0.25128	-0.25128	0.56794	0.07287	0.02283	-0.2387	0.74162	0.33362	-0.17221	0.17221	0.67339	0.81058	0.25053	0.65878	0.41	0.27849	-0.04949	0.04949	-0.16651	0.10239	-0.35142	-0.12885	0.30457	0.62291
I_929390	CGI-83	Member of the bacterial metallo-beta-lactamase family, has high similarity to uncharacterized C. elegans Y53F4B.39	0.00391	-0.00391	-0.10447	-0.41672	-0.16134	-0.11631	0.98198	0.60965	0.13512	-0.13512	-0.21597	-0.19286	-0.28399	0.08374	-0.19594	-0.22594	0.01512	-0.01512	-0.16379	-0.00928	-0.21294	0.15351	0.14593	0.21197
I_963789	CGI-94	CGI-94 protein, a protein which is translocated to the nucleus; expression is downregulated in early Alzheimer disease brain	-0.0958	0.0958	0.09481	0.15628	-0.01136	0.07912	0.01794	0.03905	0.2813	-0.2813	-0.05723	-0.27882	-0.16298	-0.26387	-0.45041	-0.42819	-0.05284	0.05285	-0.01251	0.11974	-0.12178	0.09099	-0.48737	-0.43979
I_931576	CH25H	Cholesterol 25-hydroxylase, involved in oxysterol production, plays a role in 25-hydroxycholesterol-mediated regulation of lipid and cholesterol metabolism	0.09545	-0.09546	-0.34847	-0.51583	-0.25928	-0.43232	1.08052	1.1732	0.00104	-0.00104	0.15235	-0.15927	0.30577	0.17215	1.25528	0.65656	-0.29866	0.29866	-0.23549	-0.00211	-0.32173	0.09831	0.56948	0.80348
I_966214	CHAF1A	Chromatin assembly factor 1 subunit A, chromatin assembly factor 1 subunit that mediates deposition of newly synthesized histones H3 and acetylated H4 onto replicated DNA, may mediate a chromatin assembly response to DNA damage by interacting with PCNA	-0.11484	0.11483	-0.29721	-0.1514	0.01543	-0.00935	-0.33208	-0.5002	-0.05953	0.05953	0.04685	-0.09786	0.01035	0.1621	-0.82318	-0.46924	0.04357	-0.04358	0.47288	0.19127	0.21059	0.09117	-0.55503	-0.72943
I_1002516	CHEK1	CHK1 checkpoint homolog (S. pombe), protein kinase that is required for the mitotic G2 checkpoint in response to DNA damage caused by radiation, inhibits mitotic entry after DNA damage via a mechanism that involves the phosphatase CDC25	-0.17217	0.17217	-0.15385	-0.05241	-0.19234	0.13868	-0.47735	-0.22953	-0.02179	0.02179	0.09014	0.36125	0.01231	0.11614	-0.54242	-0.44207	0.27482	-0.27482	0.27251	-0.36745	-0.24913	-0.67789	-0.93447	-0.85953
I_1201903	CHK	Choline kinase, catalyzes the first step in the CDP-choline pathway, plays a role in regulation of cell growth, elevated activity may be involved in tumor development while decreased activity is associated with Alzheimer disease	-0.02552	0.02552	-0.63371	-0.52036	-0.35101	-0.3419	-0.34982	-0.49506	-0.11178	0.11178	-0.74649	-0.76906	-0.57847	-1.01161	-1.0698	-0.38187	0.22496	-0.22497	0.12761	-0.05246	0.13064	-0.09864	-0.85738	-0.48211
I_939707	CHN1	Chimerin (n-chimaerin) 1, functions as both a GTPase activating protein for RAC1 and a phospholipid dependent phorbol ester receptor, induces the formation of lamellopodia and filopodia	0.05878	-0.05878	0.3354	0.20394	0.0495	0.00217	0.68848	0.77776	-0.10045	0.10045	0.09208	0.42997	0.02777	0.18076	1.15702	1.15802	-0.04141	0.04141	-0.21789	-0.24902	0.14474	-0.29757	0.50838	0.41341
I_960419	CKAP2	Cytoskeleton associated protein 2, a protein of unknown function associated with the cytoskeleton, differential expression levels in diffuse large B cell lymphomas	0.09639	-0.09639	0.46181	0.21485	0.07197	-0.09566	-0.24718	-0.67215	-0.00199	0.00199	0.16517	0.22792	0.07023	0.0793	0.19787	0.28887	-0.09222	0.09222	-0.08426	0.19245	-0.11659	0.13152	-1.06695	-0.91075
I_959987	CKLF1	Chemokine-like factor 1, a secreted chemoattractant for leukocytes, neutrophils, monocytes and lymphocytes, stimulates inflammatory response and muscle stem cell proliferation and proliferation, plays a role in the regulation of myogenesis	0.04719	-0.0472	0.09613	0.04706	0.1191	-0.10256	-0.11171	-0.10618	0.0979	-0.0979	-0.03679	0.06537	-0.09798	0.03118	-0.52002	-0.56934	-0.1349	0.1349	-0.09434	-0.0563	-0.08516	-0.04084	-0.65667	-0.63546
I_929087	CKS1B	CDC28 protein kinase 1, binds and regulates CDK2-cyclin A complexes, similar to S. pombe p13suc1, required for SCF dependent degradation of p27	-0.12051	0.12051	0.14406	0.32346	0.13065	0.24099	-0.69199	-0.43062	-0.00608	0.00609	0.18021	0.38749	0.12586	0.28934	0.06657	0.08485	0.14156	-0.14157	0.01282	-0.22556	0.06539	-0.25733	-1.11777	-1.46699
I_931102	CKS2	Protein that binds to CDC2/CDC28 protein kinase, regulates CDK-cyclin complexes; similar to S. pombe p13suc1	-0.12085	0.12085	0.40781	0.41767	0.3212	0.21496	-0.51689	-0.50721	0.15923	-0.15923	-0.1522	-0.26673	-0.04818	0.05082	0.17488	0.19419	-0.0682	0.0682	0.2321	0.28159	0.15392	0.16447	-1.28069	-1.31757
I_931061	CLC_2	Cardiotrophin-like cytokine (novel neurotrophin-1, B-cell stimulating factor-3), an IL-6 family cytokine that associates with cytokine-like factor 1 (human CRLF1) and binds to the CNTFR complex, may play a role in neurogenesis and motoneuron survival	-0.08404	0.08404	0.9889	0.64829	0.14791	0.08385	-0.08748	0.13227	-0.02416	0.02416	0.42176	0.41404	0.43462	0.39896	0.63887	0.02599	-0.11954	0.11954	0.90589	0.55928	0.13457	0.21094	0.5942	1.25009
I_956929	CLDN11	Claudin 11 (oligodendrocyte specific protein), a candidate autoantigen in multiple sclerosis	-0.07702	0.07702	0.40623	0.23291	0.04858	0.01849	0.00828	-0.02705	-0.05811	0.0581	-0.07534	-0.18948	0.12521	0.11018	0.40027	0.37416	-0.09826	0.09826	0.0754	-0.18674	-0.12427	-0.09685	0.30136	0.46341
I_966512	CLIPR-59	CLIP-170-related protein, associates with the trans-Golgi and at low levels with microtubules, may regulate retrograde endosome-to-Golgi transport, endocytosis and microtubule-membrane interactions	0.18727	-0.18728	0.49748	0.30713	0.43533	0.06292	0.41683	0.61271	0.08786	-0.08785	0.08722	0.0807	0.05522	0.04811	0.65333	0.33528	-0.29512	0.29511	-0.59934	-0.39231	-0.44012	-0.27613	0.59143	0.87896
I_958611	CLN6	Ceroid-lipofuscinosis neuronal 6 late infantile variant, a putative transmembrane protein, may be involved in energy metabolism and neuronal differentiation; gene is mutated in variant late-infantile neuronal ceroid lipofuscinosis	0.02513	-0.02513	-0.02947	-0.5299	-0.01717	-0.18604	-0.41652	-0.81209	-0.06296	0.06296	-0.14607	0.00196	-0.1172	-0.08557	-0.51998	-0.21028	-0.04081	0.04081	0.01386	0.09075	-0.11351	-0.01641	-0.38256	-0.13842
I_929159	CLU	Clusterin (apolipoprotein J), a component of a subclass of high density lipoproteins, binds bacteria, involved in apoptosis, cell adhesion, and stress response, increased expression is associated with various cancers and neurological diseases	-0.1115	0.1115	0.17744	-0.03879	-0.34285	0.10274	-0.73664	-0.16935	0.04903	-0.04902	0.00513	0.16483	-0.04076	0.01248	0.29245	0.23397	0.23626	-0.23626	0.077	-0.27216	-0.01219	-0.21338	1.32707	1.27394
I_936441	CNAP1	Chromosome condensation-related SMC-associated protein 1, histone-binding protein and putative component of the condensin complex, required for chromosome condensation	-0.05323	0.05323	-0.35673	-0.05802	-0.11237	0.00254	-0.66716	-0.44298	0.27345	-0.27345	0.01197	-0.2462	-0.01312	-0.19275	0.30603	0.23992	-0.04331	0.04332	0.04665	0.15626	0.15695	0.22548	-0.90331	-0.86155
I_964814	CNK	Cytokine inducible kinase, a serine/threonine kinase of the polo family, may be involved in cell cycle regulation and mitosis, downregulated in squamous cell carcinoma and other tumor tissues	0.07915	-0.07916	0.66109	0.46273	0.21724	-0.05815	0.12368	-0.21657	-0.11937	0.11937	0.47617	0.61358	0.19811	0.26033	0.69326	0.62004	-0.06264	0.06265	0.26951	0.34534	-0.18946	0.08337	0.32701	0.46017
I_966622	CNN2	Calponin 2, a non-smooth muscle isoform of a family of actin-binding proteins, may bind acting, may be involved in organization of the cytoskeleton, expression is attenuated to the normal level in Down syndrome fetuses	-0.05237	0.05237	0.26741	0.39544	0.23459	0.20808	-0.1086	0.11494	0.21335	-0.21335	0.29041	0.2318	0.08827	0.23162	0.77973	0.41842	0.0155	-0.0155	-0.09212	-0.0734	-0.05709	0.09071	0.58191	0.71989
I_957267	COL12A1	Collagen type XII alpha 1, member of the family of fibril-associated collagens that have interrupted triple helices (FACIT), may be involved in skeletal development, has reduced expression in keratoconus corneas	0.04794	-0.04794	0.27996	0.30203	0.0186	-0.08203	0.46514	0.62959	0.11139	-0.11138	0.03433	-0.47517	0.34033	-0.06916	0.93827	0.72338	-0.24757	0.24758	-0.41541	-0.22751	-0.60335	-0.16183	-0.27864	-0.03662
I_930569	COL1A2	Alpha 2 subunit of type I collagen, involved in cell-matrix adhesion and wound healing; mutations of the gene are associated with Ehlers-Danlos syndrome type VII, systemic sclerosis and osteogenesis imperfecta	-0.5232	0.52319	-0.76519	0.56704	-0.26402	0.34083	-4.47417	-4.47417	-0.32191	0.3219	-5.03969	-0.2889	-5.03969	-5.03969	-5.03969	-5.03969	1.57204	-1.57204	1.40758	-1.57204	1.26428	-1.57204	1.42125	-1.57204
I_962560	COL4A5	Alpha 5 subunit of type IV collagen, a component of collagen type IV which contributes to the basement membrane, may function in formation of the kidney gomerular basement membrane and in hearing; mutation of the corresponding gene causes Alport syndrome	-0.02036	0.02036	-1.21585	-0.24643	0.1035	-0.09282	0.0092	-0.03314	-0.01778	0.01778	-0.60288	-0.31143	-0.50688	-0.54752	-0.73558	-0.04672	0.05352	-0.05352	-0.07301	-1.6895	-0.12891	-0.19003	0.16326	0.20128
I_963125	COL5A1	Alpha 1 subunit of type V collagen, involved in skeletal development and maintenance of epidermal structure and stability, likely important for collagen fibril formation; mutation of corresponding gene causes Ehlers-Danlos syndrome types I and II	0.1721	-0.17209	0.22596	0.40917	0.14998	0.22939	0.04252	-0.42493	0.01468	-0.01468	0.40933	0.2546	0.56863	0.34293	0.94091	0.72272	-0.17105	0.17105	0.19146	0.20334	-0.16033	0.03022	0.46663	1.09902
I_928303	COL8A1	Alpha 1 subunit of type VIII collagen, an extracellular matrix protein that forms homotrimers, contains a non-triple helical (NC1) domain which induces cell cycle arrest and apoptosis in endothelial cells	0.12223	-0.12223	1.05446	0.50347	0.4666	-0.10855	0.57465	0.58474	-0.11643	0.11642	0.12942	0.2336	0.16741	0.29526	0.87906	0.57583	-0.35486	0.35486	0.67122	0.08795	-0.30746	0.117	0.76191	1.40991
I_930950	COL8A2	Alpha 2 subunit of type VIII collagen, member of a family extracellular matrix proteins, likely component of the basement membrane of corneal endothelial cells; mutations in the gene are associated with corneal endothelial dystrophies	0.08697	-0.08696	0.32393	0.11941	0.18367	-0.17249	0.63796	0.82666	-0.1373	0.1373	-0.05771	0.34189	0.25153	0.34685	0.76256	0.69574	0.31692	-0.31692	-0.37506	-0.23293	0.00646	0.35588	0.63048	0.61584
I_1109850	COLEC12	Collectin subfamily member 12, a type II transmembrane glycoprotein that binds bacteria through its lectin domain and may play a role in host defense, also binds LDL and may play a role in atherogenesis	0.07626	-0.07626	-0.1445	-0.3401	-0.24818	-0.32405	0.81649	0.51969	-0.01363	0.01363	-0.21744	-0.17207	-0.10781	0.01842	0.59389	0.76892	-0.06507	0.06507	-0.43484	-0.38134	-0.27996	-0.22162	-0.21457	-0.10958
I_957458	COQ3	Coenzyme Q (ubiquinone) methyltransferase, an O-methyltransferase that catalyzes the methylation of 3,4-dihydroxy-5-polyprenylbenzoic acid and the conversion of demethyl-Q to ubiquinone in ubiquinone biosynthesis	-0.05893	0.05893	-0.12622	-0.31513	-0.25881	-0.32173	0.36464	-0.33506	-0.17627	0.17627	0.06818	0.2216	-0.21982	-0.16745	-0.69785	-0.43374	0.13599	-0.13599	0.10512	0.11251	-0.06052	0.01893	-0.44974	-0.25328
I_930390	CPR2	Cell cycle progression 2 protein, suppresses S. cerevisiae pheromone-induced G1 arrest when ectopically expressed; expression is reduced by overexpression of PNN, an adhesion-related protein	-0.0686	0.06861	-0.16958	0.10536	-0.07439	-0.00436	-0.19876	-0.19937	0.20574	-0.20574	-0.11659	-0.2542	-0.20727	-0.30298	-0.43613	-0.34262	0.0003	-0.0003	0.05498	0.01807	-0.08519	0.01999	-0.54299	-0.541
I_961997	CPT1B	Muscle carnitine palmitoyltransferase I, rate-controlling enzyme of long-chain fatty acid beta-oxidation pathway, expressed in muscle and adipocytes	-0.10795	0.10795	-0.78589	-0.39048	-0.1136	-0.02262	-0.07592	-0.11734	0.12085	-0.12085	-0.40136	-0.22766	-0.10469	-0.32251	-0.20003	-0.18001	0.2591	-0.2591	-0.542	-0.2111	0.22552	0.02278	-1.08151	-1.08643
I_961971	CPT1C	Protein with high similarity to liver carnitine palmitoyltransferase I (human CPT1A), which is an enzyme of long-chain fatty acid beta-oxidation pathway, member of the choline or carnitine o-acyltransferase family	0.01546	-0.01545	0.2063	0.19318	0.2881	-0.06736	0.87232	0.33226	-0.17514	0.17514	0.16775	0.17413	0.19505	0.48379	0.59058	0.31287	-0.10865	0.10865	-0.04461	0.0149	0.02376	0.15076	0.31856	0.48658
I_930071	CPVL	Carboxypeptidase vitellogenic-like, member of the serine carboxypeptidase family, induced during maturation of monocytes into macrophages	-0.14822	0.14821	-1.68314	-0.64709	-0.59061	-0.14327	-1.12136	-0.25922	0.93519	-0.93518	-0.40566	-1.2908	0.3898	-1.15984	-0.05201	-0.75788	-0.1199	0.1199	-1.9274	-0.51948	-0.29927	-0.28131	-1.22352	-0.52021
I_957805	CPZ	Carboxypeptidase Z, a metalloprotease that cleaves substrates with basic C-terminal residues, may process extracellular peptides; N-terminal domain is similar to frizzled Wnt/wingless binding domain	0.74657	-0.74657	-1.34912	-1.45972	-2.19464	-1.53048	-1.59424	-0.069	-0.00311	0.00311	-0.15603	-0.43274	0.05269	-0.53499	0.74739	0.26928	-0.16725	0.16725	0.07771	-0.4306	-0.47435	0.00558	0.64666	1.09123
I_932974	CRFG	G protein-binding protein CRFG (chronic renal failure gene), contains a guanosine triphosphate-binding motif, may regulate GTP-dependent events associated with cell growth and division; expression of rat Crfg is decreased in rat models of renal disease	-0.02194	0.02194	0.34437	0.26195	-0.06193	-0.03432	0.00726	-0.03263	0.15183	-0.15183	0.08012	0.24348	-0.08571	-0.19594	-0.27559	-0.29212	0.03532	-0.03533	-0.03784	0.15599	-0.21231	0.02618	-0.36856	-0.41227
I_961604	CRSP7	Cofactor required for Sp1 (CRSP) transcriptional activation subunit 7, transcription co-activator that is required for Sp1 mediated transcriptional regulation	0.05297	-0.05296	0.39676	0.05714	-0.0183	-0.15409	0.1745	-0.16082	-0.0453	0.0453	0.20556	0.22478	-0.18533	-0.01767	-0.2178	0.03821	-0.03159	0.03158	0.14019	0.22697	-0.06803	0.04533	-0.41812	-0.29834
I_960930	CSE1L	CSE1 chromosome segregation 1-like (yeast), importin-alpha nuclear export receptor, functions in apoptosis, nucleocytoplasmic transport, and epithelial cell polarity; corresponding gene is amplified in breast and colon carcinoma cell lines	-0.07491	0.07491	0.06423	0.2103	0.15909	0.12331	-0.36418	-0.22062	0.31294	-0.31294	0.26006	0.14742	0.01929	0.07154	-0.34536	-0.52663	-0.06379	0.06379	-0.27603	-0.00403	-0.18176	-0.02355	-0.71205	-0.80601
I_930321	CSRP1	Cysteine and glycine-rich protein, a two zinc finger/LIM domain protein which interacts with alpha actinin (ACTN1); capable of homodimerization, may also be a DNA-binding protein	0.09533	-0.09533	0.21313	0.23704	0.04972	0.14368	-0.51657	-0.25746	0.02343	-0.02343	0.12739	0.31225	0.12915	0.08747	-0.34298	-0.2659	-0.14274	0.14274	0.26261	0.04396	0.28735	0.03426	0.30739	0.13403
I_961770	CTCFL	Protein containing ten C2H2 type zinc finger domains, which bind nucleic acids, has high similarity to a region of CCCTC-binding factor (mouse Ctcf), which is a zinc finger transcription factor that regulates chromatin insulation and gene repression	-0.30652	0.30652	0.69121	0.07695	-0.14806	-0.20799	-0.20076	0.05995	-0.08364	0.08363	-0.44523	-0.60464	-0.16684	-0.28804	-0.5107	-0.41004	-0.04225	0.04225	-0.5504	-0.25875	-0.10236	-0.13947	0.05659	-0.32891
I_964254	CTPS	CTP synthetase, mutations in the corresponding gene may be associated with resistance to the chemotherapeutic drugs arabinosyl cytosine and 5-fluorouracil, and may also contribute to a mutator phenotype	0.16299	-0.163	0.0277	0.14368	-0.42318	-0.11764	-0.60655	-0.54342	0.0552	-0.0552	0.15551	-0.06103	-0.02712	-0.0322	-0.42669	-0.28774	0.01377	-0.01376	0.23704	0.34321	0.12505	0.22229	-0.07286	-0.21433
I_931481	CTSK	Cathepsin K, a cysteine (thiol) protease involved in bone remodeling and reabsorption, acts as a collagenase and may play a role in extracellular matrix degradation; mutations in the corresponding gene cause the bone disorder pyknodysostosis	0.20807	-0.20807	0.73726	0.30927	-0.00383	-0.21	0.46527	0.59812	-0.13842	0.13842	0.34927	0.20192	0.41827	0.09054	0.90651	0.82716	-0.22679	0.22678	-0.67968	-0.39277	-0.61012	-0.46619	0.24728	0.55781
I_957623	CXCL1	Growth related oncogene (melanoma growth stimulating activity), a CXC chemokine that binds interleukin 8 receptor to mobilize intracellular calcium, acts as a leukocyte mitogenic factor with growth-regulatory and chemotactic properties during ...	0.02349	-0.02349	0.56868	0.32394	-0.1105	-0.14397	0.48355	0.1087	0.10669	-0.10669	-0.24047	-0.17457	-0.17239	-0.31036	-0.49977	-0.46194	-0.03972	0.03973	-0.78479	-0.39423	-0.59833	-0.2609	-0.69028	-0.55011
I_964882	CXCL11	Small inducible cytokine B Cys-X-Cys 11, a CXC chemokine that is chemotactic for activated T cells, major ligand of receptor CXCR3 (human GPR9), may participate in acute allograft rejection and play a role in atherosclerosis	-0.00841	0.00842	-0.28671	-0.70019	-0.77787	0.07872	-0.55322	-0.4112	0.32045	-0.32045	-0.17013	0.16715	-0.49119	0.08882	0.26961	-0.10639	-0.10557	0.10558	-0.9865	-1.55508	-0.20204	-0.27038	-0.24404	-0.32067
I_931661	CXCL12	Stromal cell-derived factor 1, an alpha chemokine that acts through the G protein-coupled receptor CXCR4, stimulates leukocyte adhesion, migration and chemotaxis, inhibits infection by lymphocyte-tropic HIV-1 strains	0.08478	-0.08478	0.41333	0.91339	0.20221	0.17725	0.02166	0.10807	0.16026	-0.16026	0.31982	0.36137	0.12468	0.15372	-0.62174	-0.86753	-0.11622	0.11622	0.036	-0.27397	0.00647	-0.40827	-0.01084	0.58518
I_962405	CXorf12	Chromosome X open reading frame 12, an uncharacterized protein encoded in the Xq28 region	-0.06952	0.06952	-0.14298	-0.27322	-0.16511	-0.16358	0.33694	0.14698	0.20154	-0.20154	-0.38651	-0.48637	0.0136	-0.24346	0.08579	0.0431	-0.11687	0.11687	-0.16016	-0.00043	-0.04602	0.25148	0.1758	0.46707
I_966276	CXX1	Protein of unknown function, has a region of high similarity to uncharacterized human DKFZP564B147	0.00503	-0.00503	0.06541	0.03801	0.08677	-0.06029	0.07814	-0.0285	-0.12804	0.12804	-0.00815	-0.11189	0.10688	0.16609	0.30307	0.22468	-0.08416	0.08415	-0.02727	-0.17095	0.01881	-0.00384	0.36517	0.52118
I_930103	CYCS	Somatic cytochrome c, released from mitochondria upon induction of apoptosis	0.09206	-0.09207	0.20164	0.11737	-0.0787	-0.17724	-0.29643	-0.40326	-0.00345	0.00346	-0.03957	0.02119	-0.05869	0.12817	-0.47967	-0.56646	-0.04316	0.04316	-0.04096	0.0907	-0.1261	0.02292	-0.50765	-0.56869
I_932435	CYP1B1	Cytochrome P450 subfamily I (dioxin-inducible) polypeptide 1 (glaucoma 3-primary infantile), functions in drug and xenobiotic metabolism, also an estrogen hydroxylase; mutations in the gene are associated with primary congenital glaucoma (Buphthalmos)	0.05176	-0.05176	0.07702	-0.04906	-0.00993	-0.34596	0.56488	0.52288	0.03527	-0.03527	-0.23526	-0.23022	-0.12433	-0.0196	0.71382	0.70428	-0.07209	0.07209	-0.30058	-0.15117	-0.34863	-0.19954	-0.22351	-0.0882
I_931923	CYR61	Cysteine-rich angiogenic inducer 61, a heparin binding protein involved in cell adhesion, cell migration, angiogenesis, and cell proliferation via integrin receptor signaling pathways, may be involved the progression of breast cancer	-0.09795	0.09795	-0.39717	-0.43021	-0.01268	0.05219	-0.32315	-0.13755	0.23168	-0.23168	-0.51717	-0.71815	0.04187	0.02258	0.15228	-0.00748	-0.08125	0.08124	-1.12075	-1.33433	-0.07791	0.1784	-0.11927	0.10557
I_962244	D21S2056E	DNA segment on chromosome 21 unique 2056 expressed sequence, a nucleolar protein that contains several putative coiled-coil domains and two putative C-terminal nuclear localization signals, may function in the late stages of rRNA processing	0.03075	-0.03075	0.19376	0.07678	0.09667	-0.10561	-0.34471	-0.41873	0.29226	-0.29226	0.13882	0.02494	-0.02749	-0.29379	-0.25199	0.13491	-0.19288	0.19288	0.17018	0.33452	0.03725	0.22232	-0.3806	-0.08307
I_1000496	DAAM1	Dishevelled associated activator of morphogenesis 1, a formin homology protein that functions in the activation of RhoA (ARHA) by WNT signaling, plays a role in actin cytoskeleton organization, may act in the control of cell polarity	-0.0665	0.0665	-0.19196	-0.17164	-0.13109	0.04705	0.42766	0.41026	-0.15387	0.15387	-0.27559	-0.27098	0.10166	-0.23614	0.25087	0.10562	0.13896	-0.13896	-0.01573	-0.06747	0.03322	0.00793	0.22012	0.43165
I_959124	DACT1	Protein of unknown function, has high similarity to uncharacterized mouse Dact1	-0.00994	0.00994	0.57825	-0.00553	0.21306	0.23132	0.48268	0.2132	-0.21436	0.21436	0.53609	0.40584	-0.0202	0.33984	-0.52272	-0.1978	0.08159	-0.08159	0.56068	0.48625	0.0962	-0.14356	-0.01869	0.2903
I_958638	DC13	Protein of unknown function	-0.1159	0.1159	0.06659	0.26441	-0.04606	0.13059	-0.21322	0.07378	0.03764	-0.03764	0.15797	0.22587	-0.00838	0.08491	-0.46883	-0.53628	0.16882	-0.16882	-2e-05	-0.21303	-0.20809	-0.44904	-0.77842	-0.89864
I_957199	DCK	Deoxycytidine kinase, phosphorylates deoxyribonucleosides and some antiviral and chemotherapeutic nucleoside analogs, downregulation may confer increased resistance to arabinofuranosylcytosine and dideoxycytidine	-0.08526	0.08527	0.34637	0.2584	0.05815	0.0877	0.12682	-0.30233	-0.06142	0.06142	0.08068	0.0942	-0.02387	0.00916	-0.66581	-0.37768	0.07271	-0.07271	-0.10778	0.02221	-0.10659	-0.05741	-0.44366	-0.61787
I_932495	DCN	Decorin, a dermatan/chondroitin sulfate proteoglycan that binds to collagen and transforming growth factor beta, negatively controls cell growth and may have a role during organogenesis, deficiency is associated with Marfan syndrome	-0.04069	0.04068	-0.18063	0.11443	0.09397	-0.0192	0.38352	0.8167	0.23668	-0.23668	0.01942	-0.18604	0.1849	-0.09239	0.94293	0.71725	-0.07847	0.07847	-0.56279	-0.51178	-0.47297	-0.31554	-0.02911	0.09074
I_931926	DDAH1	Dimethylarginine dimethylaminohydrolase 1, hydrolyzes N(G),N(G)-dimethylarginine and N(G)-monomethylarginine, which inhibit activity of nitric oxide synthases, reduced activity may lead to the endothelial vasodilator dysfunction in hypercholesterolemia	0.12491	-0.12491	0.7458	0.48181	0.33832	0.04469	0.05356	0.05724	0.10946	-0.10946	0.45347	0.37725	0.11875	0.1313	0.27356	0.32718	-0.16652	0.16652	-0.15523	-0.16609	-0.55117	-0.24069	-0.13835	0.26174
I_929404	DDB2	Damage-specific DNA-binding protein 2, small subunit of complex (with DDB1) that recognizes damaged DNA for repair, activates E2FI, inhibits apoptosis, antagonizes hepatitis B virus exploitation of DDB1; mutations are associated with xeroderma ...	-0.03219	0.03219	-0.08246	-0.05614	0.1056	0.09239	0.19173	0.1718	0.18799	-0.18799	-0.07211	-0.0621	0.17871	0.05801	0.67075	0.99128	-0.1084	0.10839	0.26612	0.14089	0.37752	0.3964	0.32967	0.32773
I_930271	DDR2	Discoidin domain receptor 2, receptor protein tyrosine kinase that is activated by collagen, contains discoidin motifs in the extracellular domain, upregulates matrix metalloproteinase 1, may be involved in cell adhesion	-0.0385	0.0385	0.47965	1.03681	0.10203	-0.11014	0.52427	0.6747	-0.13109	0.13108	-0.02155	0.15594	-0.16272	-0.35966	0.19699	0.60852	-0.05801	0.05801	0.49475	-0.26929	0.25661	-0.10302	1.52601	1.30689
I_958249	DDX15	DEAD/H box protein 15, a member of the DEAH box ATP-dependent RNA helicase protein family, localized to the nucleus, may have a role in splicing	0.00509	-0.00509	0.14736	0.01833	0.0501	-0.07591	0.18045	0.03028	-0.08981	0.0898	0.10837	0.22648	-0.13921	-0.02013	-0.3464	-0.19998	0.07343	-0.07343	-0.00023	-0.01863	-0.16407	-0.06677	-0.36763	-0.44752
I_932482	DDX21	DEAD-H (Asp-Glu-Ala-Asp/His) box polypeptide 21, an RNA helicase that is inhibited by the anticancer drug adriamycin, an RNA foldase that introduces an intramolecular secondary structure in ssRNA, an autoantigen in watermelon stomach disease	-0.00752	0.00752	0.32535	0.19693	-0.04041	-0.04188	-0.00271	0.01994	0.15222	-0.15223	0.23602	0.22465	-0.04549	-0.13717	-0.17315	0.00209	0.01282	-0.01282	0.1902	0.14205	-0.26547	0.03744	-0.71672	-0.62133
I_961864	DDX39	Protein with strong similarity to human BAT1, which is a member of the DEAD/H box ATP-dependent RNA helicase protein family	-0.10568	0.10567	0.03021	0.25208	0.12131	0.19233	-0.6934	-0.46165	0.21076	-0.21076	0.19075	0.2521	0.07629	0.00885	-0.29301	-0.34593	-0.03176	0.03176	-0.12277	-0.1422	-0.02076	-0.06447	-0.73686	-0.99275
I_1110157	DDX9	DEAD box protein 9 (RNA helicase A), ATP-dependent RNA and DNA helicase, involved in HIV replication and transcription, and retroviral mRNA nuclear export; present as an autoantigen in patients with systemic lupus erythematosus	-0.01126	0.01126	-0.05792	0.03875	-0.06476	-0.06851	-0.01697	-0.20776	0.16173	-0.16172	-0.00244	-0.07352	-0.05948	0.05423	-0.36716	-0.25997	-0.02585	0.02585	-0.06488	-0.00143	-0.15317	0.03438	-0.56275	-0.61638
I_961956	DEFB126	Protein of unknown function	-0.01974	0.01974	0.44866	0.21294	0.86673	0.37865	0.12164	0.51814	0.05937	-0.05937	-0.15609	0.13931	-0.33543	-0.00547	-0.24197	0.45841	0.11187	-0.11187	1.03718	0.43226	0.58647	0.7659	0.42276	0.15292
I_930105	DFNA5	Deafness autosomal dominant 5, involved in hearing, contributes to etoposide resistance in melanoma cells, may be involved in hormonally unresponsive breast cancer tumorigenesis; gene mutations cause non-syndromic hearing impairment	0.24102	-0.24103	-0.33694	-0.34894	-0.54464	-0.39556	0.33246	0.14674	0.06111	-0.06111	-0.10072	-0.32502	-0.02781	-0.14081	0.34201	0.39002	0.0585	-0.0585	-0.30183	0.08291	-0.32885	0.19706	0.28672	0.43537
I_964841	DGKB	Diacylglycerol kinase-II, catalyzes the phosphorylation long-chain diacylglycerols; rat Dagk may modulate protein kinase C-beta activity and play a role in neurogenesis	0.10707	-0.10706	-0.42115	-0.23592	-0.46438	0.00021	-0.01824	0.74287	0.12532	-0.12532	-0.14766	-0.43695	-0.03191	-0.026	0.34808	0.1748	0.14359	-0.14359	-0.30569	0.439	0.57958	0.08886	0.5585	0.10218
I_960416	DIAPH3	Protein containing a formin homology 2 domain, which are found in proteins that control rearrangements of the actin cytoskeleton, has strong similarity to a region of diaphanous homolog 3 (mouse Diap3), which is a RhoA effector protein	-0.05472	0.05472	0.78882	0.55429	0.3465	0.22333	-0.10839	-0.12849	0.12927	-0.12927	-0.05401	-0.23762	0.19026	0.22267	-0.09837	-0.10597	-0.08253	0.08253	0.29555	0.46016	0.17789	0.34012	-0.1116	0.08214
I_931165	DISC1	Disrupted-in-schizophrenia 1, contains globular N-terminal domain(s) and a helical C-terminal domain; disruption of the corresponding gene by translocation may be associated with schizophrenia and with unipolar and bipolar affective disorders	0.05319	-0.05319	-0.35272	-0.16686	-0.28887	-0.04839	0.16205	0.16986	-0.19331	0.19332	-0.47295	-0.55371	-0.19897	-0.09396	0.06411	0.17993	0.28787	-0.28787	-0.73704	-0.29877	-0.16071	-0.31455	-0.22583	-0.78905
I_966273	DKC1	Dyskerin, putative pseudouridine synthase that is a component of telomerase and H+ACA snoRNA, may have roles in telomere elongation and ribosome biogenesis; mutations resulting in reduced expression cause X-linked dyskeratosis congenita	0.04318	-0.04318	0.14701	-0.05184	-0.09047	-0.19571	0.0467	-0.19218	0.09742	-0.09742	0.17098	0.33481	-0.09424	0.14794	-0.26917	-0.2115	0.01734	-0.01734	0.03995	0.2075	-0.03989	0.04762	-0.47666	-0.3365
I_948019	DKFZP434C245	Protein containing six WD domains (WD-40 repeats), which may mediate protein-protein interactions, has low similarity to guanine nucleotide binding protein beta 5 (rat Gnb5), which is involved in sodium transport	0.03232	-0.03232	0.262	0.13373	0.07778	0.09416	-0.5195	-0.51136	0.1925	-0.1925	-0.06087	-0.16226	-0.00707	-0.11866	-0.09076	-0.16525	-0.08784	0.08784	0.2698	0.35949	0.09319	0.38115	-0.68568	-0.3982
I_934603	DKFZP434G2226	Protein containing a kinesin motor domain, which bind ATP and microtubules, has low similarity to S. pombe Klp5p, which is a kinesin that destablizes microtubules and is required during meiosis and for mitotic chromosome segregation	-0.12203	0.12203	0.21979	0.29145	0.17459	0.14892	-0.33935	-0.28452	0.24539	-0.24539	0.17943	0.10627	0.13835	-0.10009	-0.30976	-0.13097	-0.0256	0.0256	0.37996	0.33281	0.21585	0.11742	-0.82502	-0.45182
I_959940	DKFZP434H132	Protein of unknown function	-0.0275	0.0275	0.50752	0.3103	-0.02733	-0.29419	0.38587	-0.06	-0.04807	0.04807	0.39614	0.43183	-0.12403	-0.15497	-0.18425	0.06488	0.0145	-0.01449	0.1448	0.18039	-0.3903	-0.11389	-0.69694	-0.47513
I_929205	DKFZp434K1210	DKFZp434K1210, protein induced in response to hypoxia, expressed in astrocytes and several tumor cell lines	-0.05314	0.05314	0.25653	0.14871	0.01847	0.08406	0.55922	0.64082	0.31959	-0.31958	-0.01414	0.00815	-0.06525	-0.27105	0.33242	0.59818	-0.0603	0.0603	-0.22551	-0.08542	-0.0196	0.09088	-0.17206	-0.13191
I_958239	DKFZp434L142	Protein of unknown function, has strong similarity to uncharacterized mouse 1110032E23Rik	0.04166	-0.04166	-0.19856	-0.39579	-0.16517	-0.12861	0.93303	0.57298	0.03408	-0.03408	-1.18973	0.18934	0.08373	-0.70956	0.19057	0.24213	-0.13155	0.13155	-0.55616	-0.52018	-0.2048	-0.28063	0.66532	0.47688
I_957940	DKFZP434P0714	Protein containing five armadillo or beta-catenin repeats, which mediate interactions with diverse binding partners	-0.10617	0.10617	0.16782	0.34706	-0.58678	-0.22244	0.10097	0.23046	-0.13603	0.13602	-0.02602	-0.63636	-0.16319	-0.2679	-0.33001	-0.20384	0.04139	-0.04138	0.22386	0.26368	-0.08535	0.09719	0.95604	0.55226
I_1152001	DKFZp547A023	Protein of unknown function, has strong similarity to uncharacterized mouse BC003236	-0.18378	0.18378	0.26787	0.29878	-0.04874	0.28581	0.59768	0.55092	0.32309	-0.32308	0.22437	0.23801	0.1597	-0.1381	0.48202	0.4115	-0.05146	0.05146	0.0347	0.13845	-0.35029	-0.0134	-0.16176	-0.39065
I_964477	DKFZp547E052	Protein of unknown function	-0.14055	0.14055	0.43624	0.45257	-0.11708	-0.21224	0.5976	0.41248	0.1013	-0.1013	0.3531	-0.20003	0.10273	0.12815	0.69713	0.2716	-0.16006	0.16007	-0.08705	0.09093	-0.12058	0.11592	0.74389	1.14804
I_957454	DKFZP564G202	Member of the copper type II ascorbate-dependent monooxygenase family, contains a copper type II ascorbate-dependent monooxygenase C-terminal domain, has low similarity to dopamine beta-hydroxylase (human DBH)	0.08298	-0.08297	-0.01056	-0.0707	-0.00678	-0.25473	0.5353	0.55259	0.0915	-0.0915	0.16724	0.12349	0.06994	-0.06881	0.41221	0.27382	-0.09491	0.0949	-0.36882	-0.19066	-0.31266	-0.00261	-0.02029	0.26236
I_961036	DKFZP566F0546	Protein of unknown function, has very strong similarity to uncharacterized human DKFZP566F0546	-0.11667	0.11666	-0.23705	-0.2675	0.07611	0.02788	-0.38008	-0.30579	0.13171	-0.13171	-0.12814	-0.1072	-0.03275	-0.11494	-1.07825	-1.01368	-0.05889	0.05889	0.25539	0.29493	0.07085	0.0635	-0.56999	-0.68867
I_935686	DKFZP586H2123	Member of the trypsin family of serine proteases, contains sushi, CUB, and epidermal growth factor-like domains, has weak similarity to mannan binding lectin serine protease 1 (rat Masp1), which associates with mannan binding lectin (rat Mbl)	0.03537	-0.03537	0.66952	0.15504	0.08515	-0.04461	0.33033	0.37678	-0.06259	0.06258	0.2912	0.07911	0.33444	0.0787	0.51249	0.37462	-0.20225	0.20226	-0.2155	-0.18073	-0.32815	-0.0978	0.85904	1.33837
I_936431	DKFZP586I2223	Member of the intermediate filament family, which are components of the cytoskeleton and nuclear envelope	0.03576	-0.03577	0.12482	0.01464	0.06971	-0.02997	0.11238	0.07147	-0.09471	0.09471	0.09364	0.08543	0.05373	0.14504	0.53236	0.57294	0.15689	-0.15689	0.00482	0.10108	-0.03029	0.03414	0.40354	0.56578
I_958105	DKFZP586L0724	Protein of unknown function, has high similarity to uncharacterized mouse 1500002M01Rik	-0.13386	0.13386	-0.11251	0.04385	-0.10557	-0.00489	-0.05746	0.03317	0.21452	-0.21453	0.14971	-0.11833	-0.06225	-0.21017	-0.40083	-0.44517	0.0172	-0.0172	0.15204	0.2018	-0.09984	0.12664	-0.3781	-0.34607
I_957248	DKFZp761C121	Protein containing three ankyrin (Ank) repeats, has a region of moderate similarity to a region of NF-kappaB inhibitor-like 2 (human NFKBIL2), which regulates transcription by inhibiting DNA binding of NFKB1-RELA NF-kappaB heterodimer and NFKB1 homodimer	-0.07096	0.07095	-0.71938	-0.32502	-0.14164	-0.01142	0.01733	-0.46294	0.10451	-0.10451	-0.34804	-0.12872	-0.20714	-0.19138	-0.43662	-0.33085	0.11043	-0.11043	-0.20731	-0.01684	0.06598	0.00051	-0.53617	-0.75844
I_957533	DKFZp761G058	Member of the protein phosphatase 2C family, which are Mg2+ dependent protein serine and threonine phosphatases, has a region of low similarity to S. cerevisiae Ptc1p, which is involved in the dephosphorylation of multiple MAP kinases	0.03638	-0.03638	-0.0777	-0.30435	0.06538	-0.0398	0.50147	0.04696	-0.19841	0.19842	-0.38353	-0.47183	-0.27411	-0.07675	-0.14092	0.47182	0.05314	-0.05314	0.08024	-0.30764	0.08974	0.11274	0.37149	0.58316
I_964445	DKFZp761H039	Member of the sugar (and other) transporter family, has low similarity to solute carrier family 22 member 7 (organic cation transporter 2, rat Slc22a7), which is a multispecific sodium-independent organic anion transporter	0.11257	-0.11257	-0.67577	-0.38965	-0.54602	-0.47894	-0.70745	-0.26192	-0.01623	0.01622	-0.51867	-0.59279	-0.40145	-0.35015	-0.22463	-0.21954	-0.28066	0.28066	-0.36977	0.0473	-0.18361	0.05387	-0.48844	-2.29258
I_932560	DKFZp761P1010	Protein containing a protein kinase domain, has low similarity to a region of fibroblast growth factor receptor 3 (mouse Fgfr3), which is a receptor tyrosine kinase involved in the negative regulation of osteoblast differentiation and osteogenesis	-0.14583	0.14582	0.40209	0.0425	0.40991	-0.10619	0.49362	-0.11132	-0.06011	0.06011	0.04253	-0.27825	-0.17849	-0.45322	-0.02884	0.25423	-0.11288	0.11288	-0.50601	-0.31558	-0.60666	-0.24627	0.55556	1.16011
I_937695	DKFZp762E1312	Protein of unknown function, has moderate similarity to uncharacterized mouse A730008H23	0.00751	-0.00751	0.34717	0.08982	0.15232	-0.05058	-0.48167	-0.9259	-0.11018	0.11018	-0.2668	-0.13312	-0.2577	-0.00033	-0.4074	0.11431	-0.02482	0.02481	0.36554	0.3672	0.10817	0.14308	-0.71371	-1.01358
I_932501	DKK1	Dickkopf homolog 1 (Xenopus laevis), member of the Dickkopf protein family, ligand for Wnt coreceptor LRP6, inhibits Wnt signaling by blocking Wnt-induced Frizzled (FZD5) and LRP6 complex formation, involved in apoptosis following DNA damage	0.06674	-0.06674	0.0871	0.09264	0.27268	0.07801	-0.08214	0.13652	0.09079	-0.09079	0.12082	0.02716	0.16526	0.11108	-0.74823	-0.79964	0.17086	-0.17086	-0.41465	-0.18524	-0.41782	-0.0603	-0.21999	0.01958
I_934794	DKK3	Dickkopf-3, a member of the Dickkopf family of secreted proteins, inhibits cell growth and may play a role in the regulation of the Wnt signaling pathway; corresponding gene is localized to a chromosomal region linked to loss of heterozygosity in tumors	-0.00521	0.00521	-0.00782	0.08788	0.14119	0.04148	0.54739	0.53062	0.08018	-0.08018	-0.0143	-0.04563	-0.03799	0.0744	0.29314	0.26954	-0.01371	0.01371	-0.19335	-0.2221	-0.16022	-0.12324	-0.27907	-0.2014
I_959284	DLG7	Discs large homolog 7 (Drosophila), a cell-cycle regulated protein that may play roles in cell proliferation, cell cycle checkpoint control, or DNA repair, may play a role in tumorigenesis in some cases of colon and breast cancer	0.00279	-0.00278	0.23089	0.2552	0.17503	0.09143	-0.52917	-0.63555	0.09027	-0.09027	0.25321	0.22487	-0.06137	0.07653	0.05868	0.10171	0.02789	-0.02789	0.04841	0.15828	-0.00952	0.08933	-1.52955	-1.48327
I_957838	DLL1	Delta-like 1 (Drosophila), member of the Notch ligand Delta family, a putative Notch receptor ligand that likely functions in cellular differentiation, may play a role in hematopoesis, upregulated in cervical squamous cell carcinoma and adenocarcinoma	0.17182	-0.17183	-1.03007	-0.85918	-1.21358	-0.66995	-0.71883	-0.49341	-0.01826	0.01826	-0.76318	-1.05553	-0.42763	-0.29148	-0.46037	-0.28527	0.11203	-0.11203	-0.50756	-0.3363	-0.16474	-0.30968	0.23027	-0.22368
I_942471	DLX2	Distal less homeo box 2, a putative transcription factor, may function in tooth and brain development; maps to region deleted in patients with mental and growth retardation, decreased gene regulation may lead to tooth defects in Axenfeld-Rieger syndrome	-0.02166	0.02165	1.20654	0.69516	0.03864	-0.00327	-0.14317	-0.20194	0.04779	-0.04779	0.18534	0.67574	-0.15696	0.00559	-0.14917	-0.06988	-0.0638	0.0638	0.0061	-0.00887	-0.23092	-0.21419	0.11785	-0.07939
I_959952	DLX4	Distal less homeo box 4, a putative tranascriptional regulator of the distal-less family of homeodomain DNA binding proteins, may regulate apoptosis and cell adhesion, and may be involved in endometrial cell differentiation and development	0.09733	-0.09733	-0.92616	-0.87926	-0.69485	-0.62283	-0.57601	-0.62137	0.71823	-0.71823	-1.21588	-1.74013	-1.39972	-0.37222	-0.34277	-0.40813	0.18361	-0.18361	0.15399	0.66026	0.40006	0.62696	-0.48169	0.27201
I_958428	DNAH9	Dynein axonemal heavy polypeptide 9, a putative member of a family of dynein ATPases that function as microtubule motor proteins to drive the movement of cilia and flagella, localized to the axoneme, expressed in ciliated airway epithelium and sperm	-0.03934	0.03934	-2.02033	-1.51663	-0.64991	-0.08382	0.23516	0.62577	0.21026	-0.21026	0.33636	-0.07577	0.25532	-0.08032	0.51972	-0.09121	0.15787	-0.15787	-0.30153	-0.36665	-0.09097	-0.24697	-0.11599	0.66108
I_932626	DNAJC9	Protein containing a DnaJ domain, which are part of chaperone (protein folding) system that mediates interaction with heat shock proteins, has a region of high similarity to a region of DnaJ (Hsp40) homolog subfamily B member 11 (human DNAJB11)	0.01872	-0.01873	0.16743	0.09899	0.03718	-0.11047	-0.36634	-0.46479	-0.08185	0.08185	0.01542	0.03314	-0.08406	0.1244	-0.91802	-0.92747	0.01672	-0.01672	0.13429	0.14308	-0.13144	-0.06478	-0.88384	-0.95422
I_962143	DNASE2	Deoxyribonuclease II lysosomal, an acid-activated DNA nicking enzyme, may participate in DNA fragmentation during apoptosis, induces apoptotic chromosome condensation when transfected into cell lines	0.08586	-0.08586	0.14333	-0.06315	0.27642	-0.06378	0.63901	0.08657	-0.22549	0.22549	-0.03441	0.09539	0.1077	0.27172	0.58971	0.64913	-0.19947	0.19947	0.00387	0.14094	0.36533	0.33843	0.59659	0.55415
I_961245	DNMT1	DNA (cytosine-5-)-methyltransferase, acts in de novo and maintenance DNA methylation and mediates gene silencing; increased expression is linked to colorectal, hepatocellular, and prostate cancer	0.01493	-0.01493	0.03068	0.02791	0.04242	-0.10032	-0.53717	-0.6838	-0.05793	0.05793	-0.20435	-0.18087	-0.13229	0.22161	-0.37677	-0.42291	-0.02854	0.02855	0.45322	0.19559	0.02297	0.14074	-0.50375	-0.54603
I_961031	DNMT3B	DNA methyltransferase 3 beta, putative de novo DNA methyltransferase, upregulated in some leukemias; mutations in the corresponding gene cause ICF syndrome (immunodeficiency, centromeric instability, and facial anomalies)	-0.00212	0.00212	-0.69264	-0.41588	-0.55349	-0.18368	-0.60974	-0.465	0.31674	-0.31675	-0.47535	-0.51923	-0.34298	-0.45547	-0.47445	-0.46454	0.10098	-0.10098	-0.0238	0.19755	0.05448	0.19256	-0.84843	-1.02157
I_941248	DPP4	Dipeptidylpeptidase IV, a serine type peptidase, removes N-terminal X-Pro and X-Ala dipeptides from regulatory peptides like SDF1 and RANTES (SCYA5), functions in T cell activation, interaction with CXCR4 and HIV-1 gp120 suggests a role in HIV infection	-0.13079	0.13079	-0.3335	0.17434	-0.17187	0.0178	0.74361	0.65201	-0.11554	0.11554	0.10234	0.29735	0.15808	0.08653	0.69181	0.75458	0.28393	-0.28394	0.26845	0.44041	0.3554	0.21362	1.74899	1.00184
I_937034	DRAP1	DR1-associated protein 1 (negative cofactor 2 alpha), member of the histone fold family, transcription factor that blocks RNA polymerase II transcription initiation through contacts with the TBP-DNA binary complex	-0.01829	0.01829	0.43334	0.24593	0.15857	0.0901	-0.40023	-0.28479	-0.14365	0.14366	0.09839	0.09727	0.14043	0.24873	-0.03571	-0.2117	-0.1633	0.16331	0.20205	0.01678	0.1269	-0.00653	0.19691	0.07442
I_960252	DRIL2	Dead ringer (Drosophila)-like 2 (bright and dead ringer), binds the C-terminal region of hypophosphorylated RB1 and the matrix-associating region of the immunoglobulin heavy-chain gene, contains an ARID (AT-Rich Interaction Domain) DNA binding domain	-0.1294	0.1294	-1.00242	-0.24321	-0.07452	0.00515	-0.21741	-0.35098	0.08426	-0.08425	-0.38134	-0.38762	-0.29984	-0.12323	-0.29941	-0.21338	0.13728	-0.13728	-0.05908	-0.1343	0.2091	-0.01416	-0.25813	-0.73714
I_928335	DSCR1L2	Down syndrome critical region gene 1-like 2, a protein similar to DSCR1L1 and ZAKI-4, contains a serine-proline motif and putative amino-terminal RNA binding domain; transcript is alternatively spliced	0.17587	-0.17587	0.19429	0.12337	0.26353	-0.0033	-0.14586	-0.43664	0.19964	-0.19964	0.35898	0.22207	0.07795	0.02385	-0.23848	-0.14943	-0.16179	0.16179	-0.18414	0.28121	-0.41788	-0.09667	-0.28945	0.08199
I_1000708	DSCR8	Down syndrome critical region 8, a cancer-testis antigen that is upregulated in malignant stages of melanocytic tumor progression, various other tumors, and cancer cell lines	0.14846	-0.14846	-1.28261	-0.84402	-0.77584	-1.00891	-1.07592	-1.17898	0.48168	-0.48168	-2.52542	-1.33477	-0.63358	-1.38232	-0.26161	-0.15148	0.59518	-0.59518	-0.21548	0.70619	0.59975	1.15058	-1.27921	-0.95548
I_966822	DSP	Desmoplakin, a desmosomal plaque protein involved in cell adhesion and tumor migration, cleaved by caspases during desmosomal disruption associated with keratinocyte apoptosis; gene mutation is associated with hereditary palmoplantar keratoderma	-0.02738	0.02738	0.40675	0.40864	0.22078	-0.07794	-0.20226	-0.22925	0.02096	-0.02096	-0.15533	-0.12116	-0.06796	0.19859	-0.16047	-0.09455	0.05097	-0.05097	0.26418	0.25361	0.08986	0.29513	-0.09746	-0.24594
I_965519	DTYMK	Deoxythymidylate kinase (dTMP kinase), phosphorylates dTMP to dTDP in dTTP biosynthesis, activity and transcript abundance peak in S phase, rate limiting for activating zidovudine (AZT)	0.03032	-0.03032	0.15444	0.04933	0.0991	-0.05105	-0.37143	-0.6217	-0.02808	0.02808	0.0151	-0.0213	-0.09612	0.09489	-0.36035	-0.36058	-0.09796	0.09796	0.15131	0.13334	0.03441	0.15075	-0.81253	-0.75113
I_961346	DUSP14	Dual specificity phosphatase 14, protein phosphatase involved in the CD28 costimulatory signaling pathways that modulate MAP kinase activation in T lymphocytes; corresponding gene is found amplified in gastric cancer	-0.05628	0.05628	0.66185	0.74657	-0.09618	-0.04763	-0.10975	0.21435	-0.00579	0.00578	0.13824	0.53456	-0.15333	-0.03089	-0.09374	-0.01046	0.09529	-0.09529	0.34803	-0.25256	0.06278	-0.33713	0.39156	0.39915
I_961201	E2-EPF	Ubiquitin carrier protein, member of the ubiquitin carrier protein (E2) family of enzymes required for ubiquitin conjugation, acts in multiubiquitin chain formation through Lys11 linkages, associated with an autoantigen in endemic pemphigus foliaceus	0.13037	-0.13037	0.38601	0.2176	0.20124	0.05004	-1.00901	-1.0228	0.10979	-0.10978	0.12198	0.09667	0.07818	0.19761	0.35975	0.15326	-0.22845	0.22845	0.29875	0.44095	0.33258	0.51015	-0.58747	-0.43812
I_961133	E2F1	E2F transcription factor 1, forms a protein dimer with transcription factor DP1 and controls the expression of genes that play roles in cell cycle, differentiation and apoptosis, has oncogenic and tumor suppressor properties	0.01895	-0.01895	0.11493	0.01681	-0.04344	-0.12058	-0.42696	-0.5491	0.0934	-0.0934	-0.10501	-0.09944	0.0168	-0.11223	-0.6871	-0.43246	-0.04864	0.04864	-0.00864	0.10361	-0.05168	0.07721	-0.68777	-0.63517
I_931823	EBNA1BP2	EBNA1-binding protein 2, a nuclear protein that positively controls cell proliferation and is implicated in the stable maintenance and segregation of latent Epstein Barr virus DNA episomes in human cells	-0.05459	0.05459	0.16146	0.09226	0.05672	-0.07478	-0.26748	-0.39207	0.00723	-0.00724	-0.02537	-0.18315	-0.15731	0.01233	-0.54964	-0.53192	-0.03719	0.03719	-0.03635	-0.04032	-0.23888	-0.08454	-0.69415	-0.7179
I_962196	EBP	Emopamil-binding protein (3-beta hydroxysteroid Delta-8,Delta-7-isomerase), involved in cholesterol biosynthesis and skeletal development, binds neuroprotective agents; mutation of the corresponding gene causes Conradi-Hunerman-Happle syndrome	0.04389	-0.04389	0.06463	0.05608	0.0785	-0.02378	-0.14675	-0.04291	0.08146	-0.08145	0.07061	0.21151	-0.02691	0.00744	-0.7237	-0.67634	-0.00406	0.00406	0.00976	-0.02147	-0.14001	0.03886	-0.43688	-0.55757
I_961185	ECH1	Enoyl Coenzyme A hydratase 1 (peroxisomal), putative enzyme that may play a role in peroxisomal beta-oxidation	-0.0932	0.0932	-0.42702	-0.12783	-0.03883	-0.00495	0.02426	0.21668	0.068	-0.06799	-0.18055	-0.13604	-0.05436	-0.0102	0.62388	0.441	-0.0663	0.0663	0.14287	-0.08097	0.26756	0.05867	0.52551	0.34385
I_962972	ECT2	Epithelial cell transforming sequence 2 oncogene, a guanine nucleotide exchange factor for Rho GTPases that is active during the G2 and M phases of the cell cycle and is required for cytokinesis and for cytokinetic RhoA (ARHA) activity	-0.04077	0.04077	0.55518	0.33962	0.17534	-0.44997	-0.0321	-0.27406	-0.168	0.168	0.0407	-0.01872	0.07365	-0.04795	0.04454	-0.15633	0.02883	-0.02883	0.25334	0.46243	-0.04412	0.20776	-0.68767	-0.04381
I_930414	EED	Embryonic ectoderm development, polycomb-group related transcriptional repressor, binds HIV MA protein, YY1, Ezh2, and histone deacetylases, may regulate integrin function, may play a role in embryonic development and in early stages of viral infection	0.00061	-0.00061	-0.14825	-0.2068	-0.05813	-0.02823	0.09787	-0.05095	0.16984	-0.16984	-0.16966	-0.17587	-0.11202	-0.07812	-0.46268	-0.44708	-0.005	0.005	-0.08526	0.12551	-0.1062	0.08428	-0.52512	-0.46126
I_966824	EEF1E1	Protein of unknown function, has strong similarity to uncharacterized mouse Eef1e1	0.09191	-0.09192	0.12472	-0.07632	-0.10074	-0.14418	0.07482	-0.00167	-0.05129	0.05129	0.17594	0.3748	0.12357	0.39261	-0.41868	-0.3797	0.03294	-0.03294	0.04025	-0.0094	-0.08536	-0.22175	-0.45483	-0.30758
I_929791	EFA6R	ADP-ribosylation factor guanine nucleotide factor 6, a putative tumor antigen recognized by autoantibodies from hepatocellular carcinoma patients, expressed in colon cancer but not normal colon tissue	-0.14308	0.14309	0.37621	0.49419	0.40295	0.25365	0.32748	0.38745	0.21227	-0.21227	0.03514	-0.04542	-0.14895	0.09482	0.38293	0.26389	-0.07337	0.07336	-0.15093	-0.12314	-0.06287	0.03781	0.55416	0.34462
I_958100	EGR1	Early growth response 1, an early response protein that is a zinc finger transcription factor, expression is induced by a wide variety of proliferative and differentiative stimuli, may play a role in atherosclerosis and response to ionizing radiation	-0.01971	0.01972	-0.8195	-0.77321	0.14426	0.09715	0.60403	0.47276	0.10859	-0.10859	-0.80282	-0.80721	-0.18184	-0.18669	-0.13476	-0.12305	-0.01865	0.01865	-2.55988	-2.43252	-0.81546	-0.68472	-1.88348	-1.87157
I_935761	EHD1	EH-domain containing 1, a member of the eps15 homology domain containing family, interacts with synaptosomal protein SNAP29, interacts with IGF1R, represses IGF1 -mediated signaling and may be involved in endocytosis	-0.0203	0.0203	0.46014	0.44073	0.03456	0.03002	-0.25837	-0.13083	-0.06892	0.06892	0.41418	0.54207	0.13945	0.10829	0.44478	0.5576	-0.12285	0.12285	0.33849	-0.0695	0.03786	-0.26084	0.10306	0.07258
I_965809	EHZF	Protein with high similarity to human OAZ, which is an OLF1-EBF associated zinc finger protein that may partner with either Smads or Olf1-EBF to regulate transcription, contains 29 C2H2 type zinc finger domains, which bind nucleic acids	-0.10732	0.10732	-0.18381	-0.36007	-0.02724	0.02146	0.7512	0.3344	0.03209	-0.03209	-0.29531	-0.22394	-0.03665	-0.27854	-0.01971	0.18547	0.16614	-0.16615	-1.06719	-0.7091	-0.6389	-0.24696	-0.05736	-0.04124
I_1152538	EIF1A	Eukaryotic translation initiation factor 1A, a single-stranded RNA binding protein involved in translation initiation, localizes to cytoplasm but also observed in nucleus due to passive diffusion	0.08189	-0.08189	0.29938	0.01174	0.02416	-0.1647	0.0533	-0.14675	-0.06325	0.06325	0.11833	0.52704	-0.04673	0.22952	-0.42314	-0.35572	0.02955	-0.02956	-0.03836	-0.00085	-0.11957	-0.07109	-0.4069	-0.47225
I_1221789	eIF2a	Protein with low similarity to S. cerevisiae Ygr054p, which is involved in protein modification and possibly signal transduction	-0.06154	0.06153	0.47095	0.34693	0.13385	0.20524	0.59227	0.64011	0.13465	-0.13465	0.19196	0.24448	0.09272	-0.03977	0.12738	0.5771	0.0087	-0.0087	0.04203	-0.10925	-0.04927	0.08478	-0.00403	-0.18812
I_959471	EIF2S1	Eukaryotic translation initiation factor 2 subunit 1 (alpha subunit of eIF2), a translation initiation factor, involved in translational regulation, inhibited by phosphorylation	-0.05817	0.05816	0.05842	0.09293	-0.0797	0.03052	-0.16414	-0.18124	-0.01733	0.01733	0.07961	-0.03535	-0.09448	-0.01727	-0.43461	-0.44715	0.05583	-0.05583	0.07679	0.03516	-0.06845	-0.03059	-0.28957	-0.40233
I_1001965	EIF4A2	Eukaryotic translation initiation factor 4A 2, a member of the DEAD-box family, a subunit of the eIF4F complex that is involved in translation initiation, has ATPase and helicase activity, may play a role in Hepatitis C viral replication	0.06905	-0.06905	-0.22366	-0.4447	-0.21937	-0.33009	0.51215	0.32647	0.11813	-0.11813	-0.19232	-0.20036	0.04044	0.16491	0.2955	0.36459	0.02786	-0.02786	-0.09	0.16346	-0.0144	0.31453	0.43311	0.61273
I_958703	EIF5	Eukaryotic translation initiation factor 5, a putative GTPase that may be involved in protein synthesis initiation and may bind the 40S ribosomal subunit to promote 80S ribosomal subunit assembly	0.07962	-0.07962	0.38649	0.15206	-0.00879	-0.14267	0.1272	-0.01626	0.08042	-0.08042	0.21919	0.20858	-0.08013	0.06105	-0.35267	-0.33629	-0.02617	0.02617	0.19966	0.42085	-0.10873	0.17413	-0.34944	-0.24622
I_961645	ELAVL1	Embryonic lethal abnormal vision-like 1 (Hu antigen R), binds mRNA 3UTRs, member of the Elav-like family of RNA-binding proteins that interact with AU-rich elements to inhibit degradation, plays a role in stress responses and tumor growth and progression	0.009	-0.009	-0.10893	-0.03219	-0.05981	-0.07752	-0.08356	-0.21953	-0.00244	0.00244	-0.04278	-0.0205	-0.12763	-0.01717	-0.2846	-0.36322	0.02505	-0.02505	-0.1138	-0.10353	-0.16533	-0.06826	-0.69583	-0.71722
I_1152514	ELKS	ELKS protein, contains nine coiled coil domains and is ubiquitously expressed; fusion of the 5 portion of the corresponding gene to the RET proto-oncogene is associated with papillary thyroid carcinoma	-0.00614	0.00614	0.87235	0.68133	0.71376	0.37298	0.21318	0.23814	-0.00486	0.00486	0.14338	0.20914	0.28184	0.21212	0.22421	0.40347	-0.01657	0.01657	0.47623	0.19672	-0.04475	0.27131	0.67864	0.91857
I_959695	EMP2	Epithelial membrane protein 2, a member of the PMP22-EMP-MP20 family of membrane glycoproteins, may play a role in control of cell proliferation, cell differentiation and cell death	-0.01684	0.01684	0.05992	0.14604	0.08131	0.01107	-0.11352	-0.10453	0.26857	-0.26857	0.02141	-0.02079	-0.04829	-0.10134	-0.48984	-0.43104	-0.09953	0.09953	-0.0746	0.05231	-0.22025	-0.07357	-0.8677	-0.82536
I_932419	EMX2	Empty spiracles homolog 2, putative homolog of D. melanogastar empty spiracles homeobox 2, may play a role in cerebral cortex development, expression is reduced in some endometrial carcinomas; gene is mutated in some patients with schizencephaly	-0.25735	0.25734	0.98333	1.06679	0.10367	-0.57785	0.84335	0.92201	-0.21261	0.21262	0.43439	0.16449	0.17401	-0.40808	0.03376	0.06976	-0.06378	0.06379	0.52092	0.25049	0.01571	0.14663	1.3203	1.72774
I_957125	ENC1	Ectodermal-neural cortex 1, may play roles in neurogenesis and cell differentiation, altered expression may contribute to brain tumor development and colorectal carcinogenesis, serves as a marker of neuronal maturation	-0.08268	0.08267	0.50633	0.56936	0.09076	0.27476	-0.7096	-0.5974	0.12221	-0.12221	0.29496	0.29616	0.13877	0.02528	0.1412	0.29372	-0.20406	0.20406	0.40014	-0.02277	0.25321	0.13191	0.35589	0.1716
I_957016	ENPP1	Ectonucleotide pyrophosphatase-phosphodiesterase 1, membrane protein that is upregulated in fibroblasts of patients with non-insulin-dependent diabetes; variant forms are associated with ossification of the posterior longitudinal ligament of the spine	-0.02095	0.02095	0.34091	0.19806	0.27416	0.10577	-0.42622	-0.54502	0.12971	-0.12971	0.04019	0.05694	0.48643	0.05109	-0.36468	-0.25957	-0.12341	0.12341	-0.27147	-0.02664	-0.31633	-0.03906	-0.21399	-0.0218
I_962988	EPAS1	Endothelial PAS domain protein 1, a bHLH transcription factor that forms a heterodimer with aryl hydrocarbon receptor nuclear translocator (ARNT) to activate hypoxia inducible promoters; overexpression is linked to tumor vascularity and malignancy	0.0201	-0.0201	-0.14543	-0.22167	0.01519	-0.09154	0.62196	0.32278	-0.11084	0.11084	-0.05445	0.03903	-0.11686	0.10238	0.52802	0.53027	0.0026	-0.0026	-0.22878	-0.36345	-0.21269	-0.14726	-0.05991	0.00029
I_958695	EPPB9	Protein of unknown function, has strong similarity to uncharacterized mouse Eppb9	0.0642	-0.0642	0.17406	-0.06668	0.08403	-0.09222	0.59594	0.25838	-0.08074	0.08074	-0.01822	-0.06796	-0.09234	-0.06126	0.20214	0.21965	0.036	-0.03601	-0.23231	0.05617	-0.05145	0.00372	0.31612	0.767
I_1109500	EPS8R2	Protein containing an Src homology 3 (SH3) domain, which bind proline-rich peptides, has moderate similarity to human EPS8, which is phosphorylated by EGF receptor (human EGFR) and enhances EGF-dependent mitogenic signals	0.00381	-0.00381	-0.17146	-0.07157	-0.17494	-0.10105	-0.119	-0.02593	0.24441	-0.24441	0.03833	-0.1662	-0.0196	-0.17459	0.50543	0.49461	-0.17061	0.17061	0.04202	0.10187	0.21623	0.34608	0.78806	0.85704
I_965498	ETFDH	Electron-transferring-flavoprotein dehydrogenase, an electron acceptor for the mitochondrial matrix electron-transfer flavoprotein, reduces ubiquinone in the mitochondrial membrane; corresponding gene mutations cause type II glutaricacidemia	0.56793	-0.56793	0.66869	0.84254	0.68894	0.88374	1.07459	1.20711	-0.00433	0.00433	-0.74115	0.21176	0.17643	0.17513	0.37819	0.2791	0.0744	-0.07441	-0.0126	-0.28782	-0.0051	-0.06264	0.30277	0.33199
I_957121	EYA4	Eyes absent (Drosophila) homolog 4, member of the Eya family of transcriptional activators, necessary for the function of the mature organ of Corti and has a putative role in eye morphogenesis; mutations in the gene are associated with late onset ...	-0.04353	0.04353	-1.61044	-0.67704	-1.73549	-0.3384	-0.37812	-1.34865	0.44301	-0.44301	-0.39396	-0.70023	-0.62191	-1.03405	-1.70175	-0.95626	0.31776	-0.31776	-0.20166	-0.29248	0.02954	-0.23359	-1.97703	-1.5756
I_930205	EZH2	Enhancer of zeste homolog 2, a member of the polycomb group family of transcription factors, may be important for gene silencing, may be involved in bone marrow cell differentiation, may contribute to pathology of leukemias and lymphomas	-0.09534	0.09534	0.00671	0.08968	-0.05093	-0.05226	-0.33375	-0.62193	0.36132	-0.36132	0.06261	-0.04812	-0.09613	-0.20028	-0.69304	-0.24253	0.01053	-0.01053	0.18265	0.36626	-0.14236	0.15592	-1.0952	-1.05313
I_929116	FABP5	Epidermal fatty acid binding protein, binds and may transport fatty acids, has a putative role in keratinocyte differentiation, expression is increased in psoriatic skin and well-differentiated squamous cell carcinomas of the bladder	0.07245	-0.07245	0.28921	0.02805	0.06888	-0.125	-0.18277	-0.5413	0.04113	-0.04112	-0.29005	-0.0281	-0.48449	-0.26434	-0.83934	-0.32816	0.11501	-0.11501	0.04645	0.18296	-0.21939	-0.02356	-1.11488	-1.16988
I_964196	FADD	Fas associated via death domain, contains death domain, activates caspases, mediates TNF family member and Fas (TNFRSF6)-induced apoptosis, inflammatory response, cell growth, may have a role in prostate carcinogenesis, diabetes, Parkinsons disease	0.06418	-0.06418	0.10246	0.09123	0.13812	-0.06463	-0.02682	-0.09055	0.09623	-0.09622	0.03225	0.12616	-0.09686	0.03929	-0.23072	-0.23838	-0.10191	0.10191	0.14931	0.14313	-0.09218	0.03429	-0.37936	-0.32728
I_930907	FANCC	Fanconi anemia complementation group C, involved in DNA damage repair of intrastrand cross-links and apoptosis, associates with other Fanconi anemia complementation group proteins; mutations in the FANCC gene cause Fanconi anemia	-0.16126	0.16126	-0.20257	0.08593	-0.1065	0.12851	-0.2339	-0.01745	0.17322	-0.17323	-0.29664	-0.25109	0.07589	-0.2657	-0.42729	-0.91252	0.0905	-0.0905	-0.21756	-0.12889	-0.26272	-0.10143	-0.83689	-0.84067
I_957239	FANCE	Fanconi anemia complementation group E, protein with two putative nuclear localization signals, interacts with FANCA, FANCC, and FANCG; may have a role in DNA repair; mutation of the corresponding gene is detected in Fanconi anemia complementation ...	-0.07111	0.07111	0.02268	0.16107	-0.20327	-0.09368	-0.22282	-0.25273	0.21885	-0.21885	-0.04739	-0.26656	-0.12439	-0.24154	-0.62325	-0.63975	0.02462	-0.02461	-0.01939	0.05128	-0.31058	-0.05097	-0.94837	-0.79909
I_930879	FANCG	Fanconi anemia complementation group G, member of a protein complex comprised of FANCA, FANCC, FANCF, and FANCG that is required for monoubiquitination and activation of FANCD2, may be involved in DNA repair; genetic mutation causes Fanconi anemia	-0.01574	0.01574	0.02398	0.05474	0.21568	-0.00517	-0.29079	-0.34935	-0.16504	0.16504	-0.06133	0.03137	-0.12768	0.10723	-0.36468	-0.16807	0.09203	-0.09203	0.34379	0.15523	0.15754	0.035	-0.50968	-0.65162
I_941245	FAP	Fibroblast activation protein, a bifunctional serine protease with dipeptidyl peptidase and collagenase activity, may be involved in growth control of fibroblasts during development, wound repair, and epithelial carcinogenesis	-0.16825	0.16825	0.28727	0.40276	0.00922	-0.02939	0.91734	0.80263	0.2045	-0.2045	-0.17036	-0.247	-0.33908	-0.36297	0.23487	0.28738	-0.11277	0.11278	-0.26651	-0.43157	-0.23857	-0.25093	0.39094	0.50108
I_1100043	FBG3	Protein with high similarity to neural F box protein NFB42 (rat Fbxo2), member of the F-box associated region containing family, contains an F-box domain, which serve as a link between a target protein and a ubiquitin-conjugating enzyme	-0.0389	0.0389	-0.09605	-0.13725	0.19022	-0.01334	0.13319	0.1321	0.06155	-0.06155	0.02496	0.04704	-0.06273	0.14239	0.41335	0.30275	-0.03083	0.03084	0.07917	0.09352	0.26631	0.15439	0.40018	0.61062
I_966299	FBL	Fibrillarin, a nucleolar RNA-binding protein that is involved in ribosomal RNA processing; recognized by autoantibodies in scleroderma autoimmune disease, systemic sclerosis, other connective tissue diseases, and hepatocellular carcinoma	-0.06818	0.06819	0.02284	0.01446	0.094	-0.01564	-0.0477	-0.11901	-0.04093	0.04093	-0.08472	-0.14484	-0.16073	0.04833	-0.32684	-0.35291	-0.01073	0.01073	0.09447	-0.00604	-0.00615	-0.00106	-0.75447	-0.83221
I_928611	FBLN2	Fibulin 2, an integrin ligand and putative extracellular matrix protein that may participate in supramolecular assemblies and may play a role in hemostatic control	0.0337	-0.0337	0.45893	0.24965	-0.03279	-0.12391	0.37701	0.48462	0.10219	-0.10218	0.13255	-0.05788	0.219	0.17238	0.64773	0.26144	-0.19821	0.19822	-0.19994	-0.15146	-0.38761	0.0721	0.66869	0.85197
I_928331	FBXL2	F-box and leucine-rich repeat protein 2 (F box leucine rich repeat 3), member of the F-box protein family expressed in the central nervous system and testis, putative subunit of the SCF ubiquitin ligase involved in protein degradation	0.04201	-0.04201	0.57434	0.18884	0.16976	-0.11874	0.57472	0.27177	-0.18331	0.18331	0.0069	-0.08139	-0.1078	0.06652	-0.07861	-0.14095	-0.0155	0.0155	-0.04617	0.06025	-0.02373	0.15261	0.80012	1.15694
I_929589	FBXO32	F-box only protein 32 (muscle atrophy F-box), member of the SCF family of E3 ubiquitin ligases, subunit of the SCF (SKP1A - cullin 1 - F-box) ubiquitin ligase protein degradation complex, may be a therapeutic target for skeletal muscle atrophy prevention	0.18638	-0.18638	0.48187	-0.0312	0.36756	0.03403	1.14752	0.52334	-0.36079	0.36079	-0.62915	-0.59425	0.23293	-0.13294	1.02587	1.06989	-0.08524	0.08524	0.40396	0.16497	-0.39336	0.64584	1.0036	1.44172
I_957481	FBXO5	F-box only protein 5, a member of a family of F-box containing proteins, a putative subunit of the SCF ubiquitin ligase complex, may be involved in ubiquitin-dependent protein degradation	-0.05011	0.05012	0.19927	0.21318	0.09056	0.16225	-0.08235	-0.28513	0.19329	-0.19329	-0.02312	0.01017	-0.0745	-0.01901	-0.78097	-0.88812	-0.08107	0.08107	-0.01868	0.23627	-0.27705	-0.07344	-1.20126	-1.40009
I_957969	FDXR	Ferredoxin reductase (adrenodoxin reductase), mitochondrial flavoprotein that mediates electron transport from NADPH to cytochrome P450scc, involved in apoptosis, increased expression is associated with drug sensitivity of a colon carcinoma cell line	0.02491	-0.02491	-0.25133	-0.28727	0.17639	0.03929	0.11214	-0.03591	-0.01967	0.01967	-0.17731	-0.06029	0.14588	0.24729	0.97831	0.88791	-0.04027	0.04027	0.02513	0.01966	0.41147	0.47012	0.94056	1.01041
I_931399	FEN1	Flap structure specific endonuclease 1, multifunctional endonuclease and exonuclease that has roles in DNA replication and repair, interaction with PCNA stimulates nuclease activity; may be involved in trinucleotide repeat expansion-related diseases	-0.10091	0.10091	-0.18463	-0.10537	-0.16786	-0.08858	-0.59624	-0.37594	-0.04884	0.04884	-0.2142	-0.24712	-0.19197	-0.16966	-0.81269	-0.7062	0.26716	-0.26716	0.06444	-0.01751	-0.06964	-0.17984	-0.94998	-0.99783
I_958188	FGF2	Basic fibroblast growth factor, regulates cell proliferation, differentiation, apoptosis, and migration in many tissues, activates protein kinases to regulate embryonic development, angiogenesis, neurogenesis, and skeletal development	0.27012	-0.27012	0.85176	0.26897	0.36686	0.34822	0.417	0.78332	0.05326	-0.05327	0.33268	0.07993	0.47635	0.39208	0.57591	0.58604	-0.17138	0.17138	0.19496	0.03315	-0.3153	0.37183	0.15055	0.49125
I_957143	FGF5	Fibroblast growth factor 5, member of the fibroblast growth factor family that promotes cell proliferation and angiogenesis, involved in neurogenesis, may participate in the pathogenesis of numerous carcinomas and Kaposis sarcoma	0.26011	-0.26011	1.2619	0.6049	0.46117	0.14651	0.03732	0.19697	-0.05099	0.05099	0.86439	0.76507	0.44976	0.51974	0.30192	0.3749	-0.2659	0.2659	-0.26072	-0.29785	-0.60063	-0.3845	-0.41436	0.06145
I_929925	FGL1	Fibrinogen-like 1 (hepatocyte-derived fibrinogen-related protein 1), member of the fibrinogen family, a putative growth factor that functions as a mitogen for liver cells, overexpressed in hepatocellular carcinomas	-0.05519	0.05519	-0.74114	-0.58584	0.13752	0.44205	-0.09212	-0.13145	-0.01265	0.01265	-0.15635	-0.00769	-0.04172	0.31875	0.22803	-0.1121	0.28008	-0.28008	-0.44966	-0.41772	-0.18289	-0.77496	-1.6794	-1.28431
I_935703	FJX1	Four jointed box 1, protein with strong similarity to mouse Fjx1, which is a putative secreted protein that is expressed in restricted domains of the developing and adult brain and may play a role in neurogenesis	0.08325	-0.08325	0.58423	0.4929	0.16682	-0.09497	0.058	0.05235	0.01015	-0.01014	0.40684	0.30605	-0.01243	0.04732	0.55879	0.60652	-0.10755	0.10755	0.30722	0.20891	-0.02511	0.21992	0.41546	0.59243
I_956941	FKSG14	Protein with high similarity to SoxLZ-Sox6 leucine zipper binding protein in testis (mouse Solt), which binds SoxLZ/Sox6 and enhances SoxLZ/Sox6-mediated transcription activation along with calcium/calmodulin-dependent protein kinase IV (mouse Camk4)	-0.03045	0.03045	0.12959	0.12002	-0.00126	0.03662	-0.31558	-0.82668	0.15924	-0.15924	-0.14947	-0.19341	-0.27394	-0.22285	-1.20606	-0.9932	-0.07168	0.07167	-0.10781	0.14031	-0.20425	-0.12613	-1.43149	-1.38068
I_1100603	FKSG42	Protein with strong similarity to Rac GTPase-activating protein 1 (human RACGAP1), which is involved in the growth and differentiation of hematopoietic cells, contains a RhoGAP (GTPase activator protein) domain	0.09399	-0.09399	0.73094	0.31255	-0.04924	0.40292	-0.31641	-0.06883	-0.12302	0.12302	0.19607	0.40153	0.10462	0.10176	0.17694	0.5184	-0.00371	0.00371	0.39615	-0.06998	0.25581	-0.07794	-0.99159	-1.08254
I_963281	FLJ10036	Protein of unknown function	-0.10965	0.10964	0.4078	0.39728	0.28199	0.17465	-0.30136	-0.38682	0.17331	-0.17331	0.06838	-0.0229	0.01573	0.10639	-0.57642	-0.42127	0.02098	-0.02098	0.30038	0.38246	0.20627	0.24032	-0.40686	-0.30485
I_929108	FLJ10052	Protein containing two sushi or short consensus repeat (SCR) domains, which are found in complement and adhesion proteins	0.15505	-0.15506	-0.42914	-0.59321	-0.47159	-0.54712	-0.82879	-0.43073	0.26973	-0.26974	-0.71873	-0.72508	-0.49709	-0.30015	-0.62837	-0.87906	-0.0054	0.0054	-0.5023	0.04408	-0.06844	-0.09263	-0.13328	-0.01586
I_958266	FLJ10055	Protein with low similarity to S. cerevisiae Aut10p, which plays a role in autophagy, pexophagy, and cytoplasm-to-vacuole targeting	0.07666	-0.07666	0.05827	-0.03802	-0.0731	-0.19118	0.45662	0.24783	0.09529	-0.09529	0.04789	0.0497	-0.06848	-0.0259	0.28636	0.25171	-0.08835	0.08834	-0.40962	-0.26656	-0.34427	-0.14833	0.18305	0.42456
I_932273	FLJ10199	Protein of unknown function, has strong similarity to uncharacterized mouse BC003277	0.23301	-0.23301	-1.05976	-0.63013	-0.86173	-0.46283	-0.85488	-0.97177	0.47902	-0.47902	-0.05368	-0.39693	-0.6511	-0.42449	0.01312	-0.07844	0.20684	-0.20684	-0.27136	-0.05866	-0.88155	-0.22704	-1.51938	-1.05219
I_932561	FLJ10292	Protein with very strong similarity to mago-nashi homolog (human MAGOH), which may play a role in RNA localization and germ cell development, contains a mago nashi protein domain	0.03782	-0.03782	0.10066	0.0681	0.00721	-0.06768	0.06574	-0.16934	-0.0264	0.0264	0.0206	-0.02098	-0.11604	0.03202	-0.41332	-0.42061	-0.00571	0.00571	0.06435	0.10308	-0.13136	0.00665	-0.39998	-0.32197
I_936572	FLJ10335	Protein of unknown function	-0.15926	0.15925	-0.72945	-0.42502	-0.25452	-0.09012	-0.12161	-0.21778	0.24818	-0.24817	-0.38639	-0.56436	-0.25037	-0.10256	-0.52058	-0.48404	0.12007	-0.12007	-0.3666	-0.23807	-0.17083	-0.18736	-0.512	-0.58498
I_928848	FLJ10407	Protein of unknown function	0.0453	-0.0453	-0.00208	-0.02775	0.05139	-0.00711	-0.191	-0.45774	-0.0922	0.0922	-0.09176	0.06481	-0.13525	0.0102	-0.28943	-0.0537	0.04367	-0.04367	0.12235	0.11042	0.03746	0.02218	-0.71569	-0.88181
I_1110249	FLJ10468	Protein of unknown function	-0.04978	0.04979	0.19386	0.3974	0.16002	0.19432	-0.80139	-0.6671	0.28791	-0.28791	-0.05926	-0.12761	-0.02588	-0.28386	0.0027	-0.04687	-0.08007	0.08006	0.47465	0.52725	0.05413	0.33285	-1.30961	-1.32104
I_965368	FLJ10496	Protein of unknown function	0.2962	-0.2962	0.33599	0.32957	0.41465	0.9166	0.23102	0.71829	-0.07899	0.07899	0.22652	0.33524	0.11056	0.37376	0.42096	0.39645	-0.02766	0.02766	0.49528	0.00711	0.49684	0.28998	0.82137	0.56538
I_942265	FLJ10514	Hypothetical protein FLJ10514, member of the class II tRNA synthetase family	-0.09453	0.09453	-0.42271	-0.10592	-0.01991	0.0104	-0.07419	-0.0133	0.14117	-0.14117	-0.20199	-0.29067	-0.2576	-0.02376	-0.48814	-0.36167	0.12284	-0.12284	-0.07316	-0.11595	0.041	-0.14779	-0.58684	-0.696
I_936287	FLJ10631	Member of the carbon-nitrogen hydrolase family, which hydrolyze carbon-nitrogen bonds, and the NAD synthase family, which are involved in NAD biosynthesis and are induced by stress conditions, has high similarity to uncharacterized S. cerevisiae Qns1p	-0.00473	0.00473	-0.01932	-0.18473	0.00631	0.07998	0.18906	0.07679	-0.13092	0.13092	0.08678	-0.20125	0.06464	-0.02056	0.43529	0.50847	-0.02886	0.02886	0.03164	0.05505	0.34989	0.23272	0.73309	1.00185
I_934125	FLJ10706	Protein of unknown function	-0.00052	0.00052	0.02899	-0.00233	-0.01488	-0.00892	-0.13367	-0.26967	0.08812	-0.08812	-0.09307	-0.11239	-0.19327	-0.06519	-0.77988	-0.66514	0.02597	-0.02598	0.12922	0.24137	-0.02814	0.04879	-0.89046	-0.91457
I_929158	FLJ10853	Protein of unknown function	-0.05133	0.05132	-0.10945	-0.18783	-0.08052	0.015	0.74451	0.4013	0.17399	-0.17399	0.14687	0.08288	0.06594	-0.12759	0.18256	0.42595	0.06863	-0.06863	-0.27307	-0.11423	-0.30092	-0.09962	-0.17134	0.1913
I_1152304	FLJ10986	Protein containing an FGGY family of carbohydrate kinases C-terminal domain	0.07518	-0.07518	0.09892	0.20013	0.23625	-0.12651	1.01747	0.97097	-0.37782	0.37782	0.23612	-0.01834	0.17878	-0.07048	0.46852	0.41504	-0.01778	0.01778	-0.31314	-0.00029	-1.11386	0.35539	0.26714	-1.29064
I_933020	FLJ11259	Protein of unknown function, has moderate similarity to uncharacterized mouse 2610318G18Rik	0.18811	-0.18811	0.49985	0.05605	0.29699	-0.15247	0.63912	0.50773	-0.20165	0.20165	0.22542	0.28088	0.38439	0.44917	0.65221	0.72221	-0.08108	0.08108	-0.32494	-0.11366	-0.15073	-0.03172	0.20547	0.52026
I_1002147	FLJ12584	Protein of unknown function, has high similarity to uncharacterized human FLJ12584	0.00173	-0.00173	-0.22689	-0.148	-0.13518	-0.07921	0.52847	0.21309	0.20151	-0.20151	-0.23881	-0.31339	0.02747	-0.12213	0.4467	0.3795	-0.14639	0.14639	-0.29481	-0.13737	-0.29585	-0.0459	0.27735	0.45552
I_956849	FLJ12592	Protein containing an acyl-CoA dehydrogenase C-terminal and an acyl-CoA dehydrogenase middle domain, has low similarity to medium chain acyl-Coenzyme A dehydrogenase (human ACADM), which is associated with fasting intolerance and hypoglycemic comas	-0.11369	0.11369	0.17541	0.04395	0.10263	0.15474	0.24978	0.48816	-0.04936	0.04936	-0.16977	-0.18868	0.0938	0.00445	0.26386	0.23073	0.00591	-0.00591	-0.18715	-0.16915	-0.14094	-0.18606	0.50127	0.19637
I_1152318	FLJ12735	Protein of unknown function, has weak similarity to a region of replication factor C (activator 1, human RFC1), which is a DNA-dependent ATPase DNA replication factor C complex subunit that binds primer 3-ends and the 5-phosphate ends of telomeres	-0.10408	0.10407	0.0605	0.07719	-0.04101	-0.06284	-0.34453	-0.68001	-0.05832	0.05832	-0.16901	-0.42327	0.10206	-0.77785	-1.12439	-0.27202	0.078	-0.078	0.35923	0.39853	0.00126	0.06073	-1.0045	-0.64974
I_931379	FLJ12888	Protein of unknown function, hasd weak similarity to uncharacterized C. elegans T07C12.12	-0.04794	0.04794	-0.24297	-0.40983	0.03356	-0.01313	0.00093	-0.41533	0.19056	-0.19056	0.0308	-0.04901	-0.09629	-0.08236	-0.60891	-0.38279	0.0313	-0.0313	-0.11025	0.1927	-0.14898	0.20457	-0.68202	-0.52109
I_932492	FLJ13081	Protein of unknown function, has strong similarity to mouse BC025641	-0.06846	0.06847	0.15947	0.11423	0.05404	0.01138	0.21693	-0.30848	0.05034	-0.05034	0.19658	0.1227	-0.06658	0.16179	-0.39029	-0.36818	-0.0685	0.0685	-0.03641	-0.04005	-0.31668	-0.2003	-0.80173	-0.65099
I_960369	FLJ13639	Protein of unknown function, has low similarity to uncharacterized human RDH13	-0.12727	0.12727	-0.37492	-0.44755	0.13375	-0.22016	0.60414	0.27597	-0.14722	0.14722	0.18158	-0.30494	0.07181	-0.01415	0.6635	0.53667	0.07843	-0.07843	-0.00096	-0.15335	-0.3272	-0.08855	0.06368	1.03916
I_958719	FLJ13912	Protein of unknown function, has low similarity to uncharacterized S. pombe Spac227.16cp	0.00456	-0.00456	0.24276	0.06755	-0.04497	-0.1008	-0.09941	-0.56	-0.25691	0.25691	0.14759	0.24841	-0.20133	0.08552	-0.87494	-0.43571	0.11582	-0.11582	0.27441	0.04652	-0.1246	-0.1481	-0.97893	-1.13582
I_940410	FLJ13949	Member of the CAF1 family ribonuclease family, contains a CCCH-type zinc finger domain, which binds DNA or RNA, has low similarity to uncharacterized C. elegans Y57A10A.Z	-0.10886	0.10886	0.07004	0.04449	-0.03443	0.04193	-0.2344	-0.17861	0.14591	-0.14591	0.13532	0.17706	-0.00627	-0.14292	-0.18708	-0.18391	-0.02435	0.02435	0.19099	0.13449	-0.16963	-0.055	-0.50302	-0.55072
I_959017	FLJ14084	Protein of unknown function	0.13563	-0.13563	0.7503	0.13939	-0.03834	-0.1463	0.39675	0.4104	-0.15626	0.15627	0.1273	0.07111	0.49968	0.57304	0.62391	0.26829	-0.16888	0.16888	0.11191	-0.07402	-0.11113	0.0663	0.89265	1.56575
I_932215	FLJ14399	Protein of unknown function, has very strong similarity to uncharacterized human FLJ14399	-0.05496	0.05495	-0.11975	-0.26355	0.08674	-0.27733	0.76183	0.16401	-0.09473	0.09473	-0.12324	-0.1454	-0.17478	-0.14742	0.17678	0.31591	-0.11378	0.11379	-0.07724	0.00367	-0.13397	0.05966	0.67156	0.83134
I_1000533	FLJ14640	Protein of unknown function	-0.09166	0.09166	0.85665	0.60846	0.36737	0.29964	0.42973	0.14508	0.00425	-0.00425	0.50065	0.50463	0.68673	0.13812	0.481	0.60371	-0.20785	0.20785	0.76961	0.25505	0.15245	0.20744	0.78138	1.67293
I_1000038	FLJ14708	Protein containing a helix-loop-helix DNA-binding domain, which mediate protein dimerization, has a region of low similarity to a region of neurogenic differentiation 2 (NeuroD-related factor, human NEUROD2), which is a transcription factor	0.15468	-0.15468	0.84996	0.89102	0.13615	0.28231	-0.09318	0.39785	-0.17007	0.17007	0.53279	0.49645	0.38373	0.16304	-0.65971	-0.77873	-0.10747	0.10747	0.2492	-0.04391	0.29938	-0.14118	0.36061	0.54648
I_1002089	FLJ14735	Protein containing a low-density lipoprotein (LDL) receptor class A domain, has low similarity to serine protease inhibitor (Kunitz type 1, human SPINT1), which inhibits hepatocyte growth factor activator	-0.01658	0.01658	0.12479	-0.05243	-0.27382	-0.12854	0.51337	0.30319	0.0349	-0.0349	0.03208	-0.21475	0.02073	-0.07172	0.14224	0.07172	0.01259	-0.01259	-0.001	0.11814	-0.11783	0.19181	0.22034	0.50519
I_932020	FLJ14751	Protein of unknown function, has strong similarity to a region of potassium channel regulator 1 (rat LOC245960), which functions as a regulatory component of non-inactivating potassium channels	-0.0012	0.0012	-0.02344	0.01547	-0.12378	-0.01118	-0.38896	-0.34559	0.16357	-0.16357	-0.26453	-0.38183	-0.07214	-0.37042	-0.60587	-0.62887	-0.13155	0.13154	-0.15835	0.20798	-0.14942	0.10003	-0.71461	-1.02515
I_931569	FLJ14813	Protein containing a protein kinase domain, has weak similarity to a region of S. cerevisiae Rim15p, which is a serine/threonine protein kinase that positively regulates expression of S. cerevisiae Ime2p and sporulation	-0.07538	0.07538	0.27671	-0.05539	0.19971	0.13113	-0.19714	-0.59381	-0.06547	0.06547	0.0094	0.0938	0.09844	-0.04088	-0.50522	-0.25269	0.04776	-0.04775	0.29991	0.32645	0.05386	0.21942	-0.65251	-0.4311
I_1000710	FLJ14834	Protein of unknown function	-0.11115	0.11116	1.23148	1.03816	0.10872	0.25684	0.76503	1.1169	0.05436	-0.05436	1.68398	0.734	0.46506	1.3267	1.00618	0.39389	-0.21449	0.21448	-0.59819	-0.55017	-0.62949	-0.7146	-0.04011	-0.15156
I_958211	FLJ14927	Protein of unknown function, has a region of moderate similarity to a region of proprotein convertase subtilisin/kexin type 5 (human PCSK5), which is a serine protease that processes prorenin to active renin (human REN)	0.02571	-0.02571	0.48175	0.67338	0.31018	0.18087	0.16519	0.24097	-0.28523	0.28523	0.4222	0.39082	0.31902	0.3794	0.22727	0.06007	0.07405	-0.07405	0.43323	-0.03342	0.1682	-0.07182	0.38693	0.7227
I_956888	FLJ20059	Protein containing five Kelch motifs, has moderate similarity to kelch-like 2 (Mayven, human KLHL2), which binds actin and is a putative transporter that may be involved in intracellular protein traffic or in controlling cell size and shape	-0.08591	0.0859	-0.39304	-0.76787	-0.29768	0.07078	0.20219	0.11225	0.12363	-0.12363	-0.51258	-0.60964	0.02225	-0.02831	0.122	0.14791	-0.19635	0.19635	0.52105	0.58704	0.59446	0.35904	0.349	0.41911
I_930453	FLJ20060	Protein of unknown function, has high similarity to uncharacterized mouse 6230416J20Rik	-0.10939	0.10939	0.20215	0.04575	0.09004	-0.02606	-0.14563	-0.53408	0.19281	-0.1928	-0.14226	-0.08169	-0.09718	-0.65298	-0.79965	-0.55323	0.02108	-0.02108	-0.07008	0.44655	-0.10864	0.23985	-0.78131	-0.52758
I_960046	FLJ20086	Protein with a region of strong similarity to zinc finger domain proteins	-0.16886	0.16886	-0.57363	-0.1164	-0.14421	0.18289	0.42053	0.30989	0.00825	-0.00825	0.13794	-0.22223	0.12938	0.0508	0.38218	0.22697	0.09784	-0.09785	-0.22036	-0.19208	-0.00257	-0.19172	0.2682	0.22377
I_959683	FLJ20136	Protein of unknown function, has low similarity to a region of S. cerevisiae Vps13p, which is involved in vacuolar sorting	-0.08855	0.08855	0.06678	-0.06816	-0.1171	0.00456	0.58982	0.21155	-0.01324	0.01325	0.12313	0.13663	0.09944	-0.08987	0.26204	0.72018	-0.14898	0.14898	0.01172	-0.24348	-0.04059	-0.09199	0.17345	0.08769
I_960081	FLJ20151	Protein of unknown function	-0.03731	0.03731	-0.23202	0.09473	0.10028	0.05682	0.0272	0.05699	0.00544	-0.00544	0.21888	-0.02908	0.00405	-0.06912	0.20897	0.26053	0.03735	-0.03734	0.55035	-0.08308	0.01374	0.02593	1.28045	1.86913
I_966584	FLJ20208	Member of bacterial pyroglutamyl peptidase family, which are cysteine proteases that hydrolyze the removal of pGlu from pGlu-peptides, has low similarity to uncharacterized C. elegans M04C9.3	-0.07331	0.07331	0.03683	0.15816	-0.01399	-0.01478	0.12212	0.1689	0.04499	-0.04499	-0.04359	-0.25099	-0.026	0.01602	0.05573	0.08019	-0.05768	0.05768	0.05568	-0.08413	0.09108	0.06402	0.78796	0.75651
I_960543	FLJ20222	Protein of unknown function	-0.10863	0.10863	0.36337	0.40931	-0.18669	-0.13167	0.30199	0.13878	0.0092	-0.0092	0.29334	0.21131	0.07214	0.13182	0.01824	0.01896	0.02049	-0.02048	0.1811	0.256	-0.36725	-0.37107	-0.1475	-0.29255
I_964800	FLJ20245	Protein of unknown function, has a region of weak similarity to C. elegans OOC-5, which is a putative ATPase that may function as a chaperone in the assembly or disassembly of proteins or protein complexes	-0.05271	0.05271	0.30418	-0.02961	-0.28764	-0.18945	-0.679	-0.51688	-0.07798	0.07798	0.04331	-0.02225	0.13217	0.02211	0.17428	-0.10807	-0.07504	0.07503	0.07086	0.14059	0.11246	0.11943	-0.21126	-0.168
I_964866	FLJ20298	Protein of unknown function, has low similarity to uncharacterized human KIAA0676	0.00738	-0.00738	0.31342	0.22783	0.22636	0.29768	1.01999	0.97993	0.27464	-0.27465	0.23303	-0.05904	0.11804	-0.09316	0.23902	0.63322	-0.18614	0.18614	0.33726	0.284	-0.1934	0.32771	0.63397	0.52141
I_930408	FLJ20311	Protein of unknown function	-0.05011	0.05012	0.11649	-0.05804	-0.09984	0.06269	-0.31169	-0.88903	-0.19945	0.19945	-0.11936	0.10415	-0.06635	0.1317	-0.36522	-0.05946	0.12257	-0.12257	0.15145	0.08341	0.09225	0.02098	-0.69335	-0.94611
I_1152180	FLJ20335	Protein containing two phox protein (PX) domains, which bind phosphoinositides, and two protein kinase domains, has strong similarity to uncharacterized mouse LOC218699	0.06857	-0.06857	-0.07516	-0.16265	0.02169	-0.09231	1.0749	0.7323	0.03624	-0.03624	-0.03581	0.24328	-0.08262	-0.03247	0.39004	0.47996	-0.01477	0.01477	-0.25416	-0.12205	-0.26574	-0.16376	0.00561	0.07649
I_928997	FLJ20354	Protein of unknown function, has low similarity to uncharacterized human FLJ11252	-0.03822	0.03821	0.35617	0.28341	0.38741	0.20955	-0.33395	-0.54686	0.0692	-0.0692	0.23516	0.25315	0.12682	0.20638	0.31922	0.5417	0.0068	-0.0068	0.2691	0.36406	0.17973	0.31324	-1.09765	-1.10701
I_931416	FLJ20477	Member of the protein of unknown function (DUF409) family, which may be membrane proteins, has weak similarity to uncharacterized C. elegans T09B4.1	0.02852	-0.02851	-0.15597	-0.28685	-0.08997	-0.15245	0.64523	0.32506	0.15299	-0.15299	-0.10924	-0.13917	0.02625	-0.16748	0.14818	0.42869	-0.04058	0.04058	-0.19121	-0.04089	-0.16747	0.20216	0.1795	0.39809
I_959821	FLJ20509	Protein of unknown function, has high similarity to uncharacterized human FLJ20509	0.12324	-0.12324	-0.6083	-0.54546	-0.05096	-0.15135	0.23547	-0.08694	0.0243	-0.0243	-0.31534	-0.34316	-0.13424	-0.38217	-0.0365	0.0174	-0.07055	0.07055	-0.57095	-0.45709	-0.13363	-0.1312	-0.40929	0.21016
I_962779	FLJ20516	Protein of unknown function, has high similarity to uncharacterized mouse 1110005A05Rik	0.01535	-0.01534	0.14473	-0.02236	0.01693	-0.08814	-0.21214	-0.54237	-0.14289	0.14288	-0.04785	-0.04507	-0.31595	0.06497	-0.70305	-0.39004	0.02387	-0.02387	0.17565	0.09317	-0.05713	-0.14935	-0.65803	-0.78511
I_929627	FLJ20533	Protein of unknown function	0.02227	-0.02227	0.16074	-0.01286	0.10563	0.01514	0.3333	0.04871	-0.00301	0.00301	0.04986	0.09713	-0.13566	-0.03388	-0.71108	-0.45957	-0.00192	0.00192	-0.19559	-0.17199	-0.2106	-0.08914	-0.39719	-0.35953
I_929790	FLJ20967	Protein containing a Src homology 2 (SH2) domain, which are regulatory modules of intracellular signaling, has a region of moderate similarity to a region of SH2 domain protein 2A (mouse Sh2d2a), which is a T cell-specific adaptor protein	0.0786	-0.0786	0.96425	1.08581	0.87147	0.41311	0.99592	0.8734	-0.02537	0.02537	0.6978	0.42236	0.23245	0.92992	0.88271	0.22771	0.00373	-0.00373	0.13662	0.13941	-0.35674	0.0533	0.09026	0.48353
I_935808	FLJ21127	Protein of unknown function, has low similarity to uncharacterized human DKFZP564D116	-0.00014	0.00014	-0.1857	-0.1305	-0.13835	-0.11274	0.04628	0.08081	0.15767	-0.15767	0.0154	-0.31584	0.13462	-0.05711	0.55992	0.50195	-0.07497	0.07497	-0.34835	-0.11668	-0.0411	0.06299	0.17435	0.46918
I_956928	FLJ21939	Protein with strong similarity to 5-azacytidine-induced gene 2 (mouse Azi2), which regulates the tumor necrosis factor-alpha (mouse Tnf)-mediated activation of NF-kappaB	0.01072	-0.01072	0.30142	0.17045	0.11096	0.19628	0.78083	0.51343	0.08678	-0.08678	0.20223	0.32173	-0.0128	-0.1035	0.28475	0.61259	-0.09699	0.09699	-0.02033	-0.12631	-0.03867	-0.05337	0.10939	0.18737
I_1110161	FLJ22104	Protein of unknown function, has low similarity to uncharacterized C. elegans K02G10.3	0.06907	-0.06907	0.2745	-0.0297	0.19563	0.01613	0.72669	0.36828	-0.04478	0.04478	-0.34361	0.11619	-0.24209	-0.20236	-0.32159	-0.04266	0.14529	-0.14529	0.00283	0.17709	0.34827	0.30608	0.35093	0.62174
I_957537	FLJ22174	Protein of unknown function	-0.12801	0.12801	-0.31816	-0.14462	-0.20443	0.0061	0.32474	0.23397	0.26468	-0.26468	-0.15775	-0.18352	-0.1299	-0.45846	0.26705	0.18046	-0.02344	0.02344	-0.02166	0.0615	-0.11557	0.12829	0.26354	0.31061
I_956829	FLJ22419	Protein with high similarity to hematopoietic zinc finger protein (mouse Zfp385), which is required for megakaryocytopoiesis and hemostasis, contains three C2H2 type zinc finger domain, which bind nucleic acids	0.14845	-0.14845	0.75192	1.64523	0.21358	-0.08089	0.54406	0.12204	0.00172	-0.00172	-0.08134	-0.10446	0.02575	0.17302	0.93392	0.61534	-0.26009	0.26009	0.00462	0.17562	0.11	0.31099	1.38727	0.81304
I_959176	FLJ22593	Protein of unknown function	-0.07134	0.07133	-0.65877	-0.10752	-0.25753	-0.11555	-0.48208	-0.70448	-0.09473	0.09473	0.20848	-0.02253	0.03821	-0.0716	-0.07178	0.01007	0.12465	-0.12465	0.0775	0.02892	0.01335	-0.07975	-0.84662	-0.99969
I_957217	FLJ22649	Protein with high similarity to C. elegans K12H4.4, which is a putative subunit of signal peptidase complex, member of the signal peptidase subunit family	-0.07095	0.07095	0.17224	0.31121	0.06701	0.06304	-0.01319	0.12132	0.25424	-0.25425	-0.11918	-0.26953	-0.0583	-0.23034	-0.70524	-0.63718	-0.03351	0.03351	-0.09306	-0.03535	-0.23965	-0.08952	-0.45994	-0.38334
I_931155	FLJ22794	Protein of unknown function, has high similarity to uncharacterized mouse AW413625	0.02345	-0.02345	0.03879	0.1478	-0.25042	-0.10612	-0.164	-0.09425	0.17981	-0.17981	-0.10431	-0.22034	-0.11859	-0.162	-0.67758	-0.69576	-0.05098	0.05097	0.06415	0.08614	-0.07402	-0.02819	-0.71096	-0.61956
I_956828	FLJ23186	Protein of unknown function, has high similarity to uncharacterized mouse BC016579	0.00812	-0.00812	-0.31102	-0.43266	-0.24944	0.0053	-0.01758	-0.86209	-0.38205	0.38205	0.41478	0.522	-0.08389	0.25616	-0.37291	-0.01676	-0.01385	0.01385	0.44696	0.34662	0.34797	0.07674	-0.00441	-0.5005
I_930871	FLJ23221	Protein of unknown function, has high similarity to uncharacterized mouse L259	-0.0033	0.0033	0.17452	-0.20546	0.02211	-0.19218	1.0273	0.67544	0.00061	-0.00061	-0.00208	-0.02953	0.03183	-0.05506	0.2252	0.26583	-0.21914	0.21914	-0.45639	-0.34186	-0.2518	-0.10791	0.14703	0.46484
I_929787	FLJ23311	Protein of unknown function	-0.01696	0.01695	0.15678	-0.01839	0.11601	-0.15541	-0.1893	-0.47676	0.24986	-0.24987	-0.14232	-0.2607	-0.23523	-0.22465	-1.08836	-0.48002	-0.19667	0.19666	0.61749	0.75526	0.34138	0.37627	-1.19217	-1.05883
I_957579	FLJ23468	Protein of unknown function	-0.05202	0.05202	0.27326	0.26167	0.11268	0.07506	-0.3466	-0.57081	0.22355	-0.22355	-0.09337	-0.24665	-0.10392	-0.21883	-1.0167	-0.59329	-0.00555	0.00555	-0.01814	0.23382	-0.13968	0.03823	-1.29954	-1.27924
I_1152106	FLJ30685	Protein containing three Kelch motifs and a BTB (BR-C, ttk and babor) or POZ (Pox virus and zinc finger) domain, has low similarity to ectodernal-neural cortex 1 (mouse Enc1), which binds actin and serves as a marker of neuronal maturation	0.01058	-0.01058	-0.16458	-0.17311	-0.47343	0.14131	0.59263	0.54984	0	0	-0.48405	-1.11446	-0.50198	-0.71263	-0.40742	0.46791	-0.58725	0.58725	0.19634	-0.02747	-0.39665	-0.1737	0.91525	0.89157
I_1152149	FLJ31349	Protein containing a SAM (sterile alpha motif) domain, and a PDZ, DHR, or GLGF domain, which are found in signaling proteins, has high similarity to a region of membrane-associated guanylate kinase-interacting protein 1 (rat LOC59322)	-0.04643	0.04643	-0.21058	-0.25418	0.04564	-0.06191	0.55132	0.28847	0.1592	-0.1592	-0.33573	-0.43824	-0.14089	-0.28751	0.01754	0.01258	-0.07638	0.07638	-0.12063	0.00273	-0.02966	0.40566	-0.00994	0.17224
I_931389	FLJ32009	Protein containing five von Willebrand factor (vWF) type C and three epidermal growth factor (EGF)-like domains, has a region of low similarity to a region of complement component C1q receptor 1 (human C1QR1), which is a complement receptor	-0.12591	0.1259	-0.7076	-0.32472	-0.2381	0.01441	-0.01728	0.10627	0.27388	-0.27388	-0.40431	-0.20137	-0.0327	-0.3049	0.90524	0.79483	0.08032	-0.08032	-0.35517	0.03248	0.44108	0.18533	0.78907	0.53448
I_1002139	FLJ32203	Protein containing eight C2H2 type zinc finger domains, which bind nucleic acids, has low similarity to only zinc fingers (human ZNF146), which may be associated with development or progression of pancreatic carcinomas	0.29903	-0.29903	0.33165	0.49537	0.09438	0.32624	-0.06509	0.36549	0.09108	-0.09109	0.0381	0.14147	0.03977	0.12749	0.26754	0.2246	-0.04822	0.04822	0.22682	0.01049	0.34467	0.29968	0.93887	0.9097
I_947982	FLJ32332	Protein with high similarity to ras homolog gene family member C (human ARHC), which regulates actin cytoskeleton reorganization and is overexpressed in pancreatic adenocarcinoma and breast carcinoma, member of the protein phosphatase 2C family	-0.00196	0.00196	0.05951	0.23144	0.17121	0.1447	0.06565	0.14906	0.03582	-0.03582	0.00793	-0.13467	0.05944	0.02081	0.34054	0.09631	-0.11379	0.11379	0.09634	-0.07756	-0.09505	0.04422	0.64274	0.71409
I_1221812	FLJ32731	Protein of unknown function	-0.21126	0.21126	0.56662	0.08764	0.58007	0.67218	0.61343	0.55369	0.23385	-0.23385	0.54345	0.51719	0.41995	0.81994	0.32152	0.49401	0.1498	-0.14979	-0.05531	-0.17153	-0.18018	0.12018	-0.17759	-0.11651
I_930149	FLJ32915	Protein of unknown function	0.03084	-0.03084	0.49466	0.09886	0.23371	0.09313	-0.01357	-0.15458	0.17103	-0.17102	0.10283	0.0509	0.07776	-0.17069	-0.11091	0.08425	0.01338	-0.01338	0.21728	0.68777	-0.04844	0.45981	-0.62784	-0.39345
I_1000300	FLJ35827	Member of a hydrophobic ELP (HELP) domain containing family, contains six WD domains (WD-40 repeat), which may mediate protein-protein interactions, has a region of high similarity to echinoderm microtubule-associated protein 2 (human EML2)	0.34817	-0.34817	-0.02294	-0.56234	-0.49175	0.16806	-0.94402	-0.04832	-0.08778	0.08778	0.48014	0.45889	0.41375	0.44602	0.62381	0.46671	0.03996	-0.03996	-0.23494	0.04236	0.5247	0.30792	1.32006	0.99015
I_931758	FLJ90440	Protein containing three immunoglobulin (Ig) domains, which may be involved in protein-protein and protein-ligand interactions, and two leucine rich repeat C-terminal cysteine rich domains	-0.0471	0.0471	-0.28913	-1.72256	0.10643	0.25308	1.08763	0.86759	0.11422	-0.11422	-0.60334	-0.42827	-0.21227	0.14108	0.44029	0.50093	-0.10799	0.10799	-0.72559	-0.3295	-0.31084	0.17753	-0.05712	-0.10558
I_957036	FOP	FGFR1 oncogene partner, contains leucine-rich repeats in putative alpha-helical regions separated by a hydrophobic spacer, may be involved in myeloid and lymphoid cell differentiation; fusion with FGFR1 may contribute to 8p11 myoproliferative syndrome	-0.14253	0.14253	0.58027	0.3289	-0.26209	0.10562	-0.10442	-0.21939	0.10236	-0.10236	0.26491	0.37826	0.09584	-0.0731	-0.13005	-0.02732	0.11916	-0.11917	-0.38493	-0.10011	-0.36516	-0.25102	-0.45475	-0.74424
I_1110036	FOSL1	FOS-like antigen 1, a member of the Fos family of proteins that heterodimerizes with Jun family members to form transcription factor AP-1, involved in cell proliferation control; overexpression is associated with tumor progression and invasive growth	-0.00758	0.00757	0.56598	0.44603	0.10287	0.07721	-0.21657	-0.50862	-0.06106	0.06106	0.26171	0.28355	-0.02589	0.05566	-0.33572	-0.16916	-0.02008	0.02008	0.15182	0.0375	-0.28215	-0.25574	-0.59691	-0.51868
I_959880	FOXC2	Forkhead box C2, transcriptional activator, modulates adipocyte metabolism, involved in skeletal and heart development, may protect against type 2 diabetes; mutation in the corresponding gene is linked to hereditary lymphedema-distichiasis syndrome	-0.06982	0.06983	0.73346	0.68975	-0.10161	0.00537	-0.3418	-0.198	0.08021	-0.08021	0.3783	0.10303	0.07211	0.17184	-0.24506	-0.55839	0.02303	-0.02303	0.11551	-0.09348	-0.42043	-0.27244	0.07307	0.48278
I_932169	FRCP1	Protein containing a fibronectin type III domain, which are involved in cell surface binding	-0.35133	0.35134	1.06763	0.7286	0.62097	0.80844	0.71354	0.55869	-0.07132	0.07132	0.49719	-0.02238	0.32072	0.37098	1.01379	0.12168	0.04829	-0.04829	0.26263	0.13224	0.25735	0.44466	0.90117	1.76322
I_966525	FSTL3	Follistatin-like 3, putative secreted glycoprotein of the follistatin module protein family, functions as an activin inhibitor; translocation of the corresponding gene is associated with B cell lymphoma and leukemia	-0.06971	0.06971	0.33951	0.40676	0.05803	0.03962	-0.2284	-0.06725	0.11722	-0.11722	0.27335	0.22856	0.2028	0.02737	-0.04352	-0.11387	-0.05577	0.05577	0.08745	0.03628	-0.2213	-0.13814	-0.36526	-0.33326
I_962493	FTHL17	Protein with high similarity to ferritin heavy polypeptide 1 (human FTH1), which is an iron-storage protein involved in c-myc (human MYC) control of cell transformation and proliferation, member of the ferritin family of non-heme iron storage proteins	-0.02835	0.02835	-0.16571	-0.1113	-0.03674	-0.05231	0.10205	0.27474	0.02852	-0.02852	-0.1191	-0.07478	0.05195	0.07282	0.60586	0.5715	0.11836	-0.11836	-0.01319	-0.10334	0.10507	0.23833	0.21783	0.16932
I_1002418	FTL	Ferritin light polypeptide, an iron storage protein; mutation in the corresponding gene is associated with hereditary hyperferritinemia-cataract syndrome and a dominant form of late-onset basal ganglia disease	-0.24054	0.24055	-0.22649	0.02829	0.01782	0.11316	0.30708	0.58353	0.03506	-0.03506	-0.04374	-0.07193	0.07841	0.0461	0.62494	0.59232	0.27594	-0.27594	-0.6784	-0.7215	-0.25452	-0.44352	-0.04187	-0.20236
I_948773	FYCO1	Protein containing a FYVE zinc finger domain and a RUN domain, which may be involved in Ras-like GTPase signaling pathways, has a region of weak similarity to early endosome antigen 1 (human EEA1), which is required for endosome fusion	-0.08894	0.08894	0.12032	0.05729	-0.06711	-0.08666	0.44916	0.48396	0.07181	-0.07181	-0.03137	-0.04111	0.21602	0.00868	0.58896	0.40193	0.00708	-0.00708	-0.14127	-0.07971	-0.20258	0.14536	0.0716	0.09392
I_963419	FZD2	Frizzled homolog 2, a member of the frizzled family of cell-surface receptors involved in Wnt signaling, expression is developmentally regulated, upregulated in some gastric cancers	-0.01317	0.01317	-0.02096	-0.02574	0.11074	0.20029	0.01828	0.0833	0.13143	-0.13143	-0.29784	-0.55225	0.09484	-0.00628	0.309	0.21548	-0.12937	0.12937	-0.18844	-0.08027	0.16045	0.1111	0.42002	0.63831
I_938569	G1P2	Interferon-stimulated protein 15 (ubiquitin cross reactive protein), a ubiquitin-like protein that conjugates to proteins, also an interferon-induced cytokine that modulates immune cell function and cell proliferation	0.04414	-0.04414	-0.21509	-0.22058	0.00648	-0.15503	0.31439	0.22313	0.1928	-0.19279	-0.0796	-0.18137	-0.09158	-0.11643	0.0795	-0.00656	-0.15508	0.15508	-0.53726	-0.37555	-0.28922	-0.07581	0.14637	0.40582
I_961370	GAA	Acid alpha-glucosidase, lysosomal alpha-glucosidase that hydrolyzes alpha(1->4) and alpha(1->6) linkages in glycogen during glycogen catabolism; heritable deficiency causes glycogenosis type II or Pompe disease	0.08975	-0.08976	-0.13306	-0.17815	-0.06776	-0.15477	0.31792	0.10277	0.17163	-0.17162	-0.57457	-0.38265	-0.28873	-0.27144	0.25983	0.48539	-0.04523	0.04523	-0.19892	-0.1345	-0.14173	0.07261	0.11415	0.18004
I_959406	GABPB1	GA-binding protein transcription factor beta subunit 1, a transcriptional coactivator that is a subunit of the heterotetrameric transcription factor E4TF1/GABP	-0.14245	0.14246	0.33106	0.4305	-0.00646	0.09608	0.04349	-0.01287	0.26265	-0.26265	0.17893	-0.13057	-0.11961	-0.33617	-0.69011	-0.55628	-0.03247	0.03246	0.15045	0.2439	-0.33591	-0.22688	-0.69231	-0.47265
I_966699	GAJ	Member of the Mnd1 family, has low similarity to S. cerevisiae Mnd1p, which is required in meiosis with S. cerevisiae Hop2p for homologous chromosome pairing and double stranded break repair	0.05658	-0.05658	0.01921	-0.09645	0.05767	-0.05608	-0.13563	-0.61604	-0.26828	0.26828	-0.1753	-0.05034	-0.077	0.22982	-0.54991	-0.55857	0.0166	-0.0166	0.39341	0.34878	0.13588	0.15611	-0.98483	-1.06399
I_963984	GAS1	Growth Arrest-Specific 1, a putative membrane protein that is able to block cell proliferation in carcinoma cell lines, induces growth arrest, and inhibits tumorigenicity through a TP53 dependent mechanism	0.20583	-0.20583	0.53904	-0.00809	0.28865	0.09127	1.14564	0.97831	-0.36209	0.36209	0.01951	0.22229	0.1541	0.41255	0.83748	0.76501	-0.01164	0.01164	-0.20518	-0.04342	0.00846	-0.02728	-0.10119	-0.03989
I_929091	GAS2	Growth arrest-specific 2, has very strong similarity to murine Gas2 which is a microfilament-associated protein that is proteolytically cleaved during apoptosis and that may induce actin cytoskeleton reorganization following phosphorylation	-0.04877	0.04876	-2.07664	-0.83316	-0.7152	0.22761	-0.84506	-2.79833	1.03539	-1.03538	-2.63582	-1.86869	0.18333	-0.32626	-2.19798	-1.21126	0.13468	-0.13468	-1.22195	-0.14364	0.58868	0.22634	-1.64105	-1.59163
I_932110	GAS41	Glioma amplified sequence 41, a putative transcription factor essential in cell proliferation, resembles AF-9 (MLLT3) and ENL (MLLT1), binds to NUMA1, which is a component of the nuclear matrix; corresponding gene is amplified in low grade glioma	-0.03362	0.03362	0.00185	-0.08054	-0.08545	-0.01557	0.19642	0.01638	0.07985	-0.07984	-0.25045	-0.24176	-0.12309	-0.18107	-0.73618	-0.48002	0.08523	-0.08523	-0.03755	0.08951	-0.16917	-0.05949	-0.76243	-0.75059
I_929630	GBP2	Guanylate binding protein 2, a GTPase, an antiviral protein induced by interferon	-0.12264	0.12264	-0.28571	-0.21533	-0.13681	-0.14694	0.48726	0.34192	0.08394	-0.08394	-0.16648	-0.34608	0.11749	0.01286	0.18799	0.07277	-0.04893	0.04893	-0.24918	0.03448	-0.05461	0.20873	0.10811	-0.12969
I_1221809	GBP3	Protein with strong similarity to GBP1 (guanylate binding protein), which specifically binds guanylate nucleotides (GMP, GDP and GTP) and is induced by interferon	-0.05887	0.05886	0.3684	0.08073	0.03179	-0.02514	0.37863	0.16499	-0.04318	0.04318	-0.38734	-0.20798	-0.37223	-0.51631	-0.24881	-0.43776	-0.02599	0.026	-0.51069	-0.37639	-0.56694	-0.37558	0.16331	0.29347
I_929637	GDAP1	Ganglioside-induced differentiation-associated protein 1, a protein with putative coiled-coil and nuclear localization regions, may function in signaling during neurogenesis; gene is mutated in axonal and demyelinating Charcot-Marie-Tooth disease type 4A	-0.35334	0.35334	-0.68694	-0.8807	-0.56625	-0.36665	-0.49719	-0.75566	0.10254	-0.10254	-0.43037	-0.75754	-0.38576	-0.12758	-0.31425	-0.27533	0.29676	-0.29677	0.32579	0.29808	0.20515	0.38525	0.23643	0.45866
I_961439	GEMIN4	Gem associated protein 4, a component of the survival of motor neurons complex, inhibits mRNA splicing and may be involved in rRNA processing, binds U1 and U5 snRNAs and galectins LGALS1 and LGALS3 and may be involved ribosome and-or spliceosome assembly	0.03986	-0.03986	0.14082	0.12932	-0.15769	-0.11664	-0.54323	-0.36911	0.01033	-0.01033	-0.02911	-0.087	-0.02235	-0.3821	-0.36854	-0.13233	-0.06089	0.0609	0.38511	0.14573	0.14143	0.09061	-0.36212	-0.11557
I_965651	GEMIN6	Gemin 6, forms part of the survival of motor neuron complex, which also includes SMN1, Gemin2 (SIP1), Gemin3 (DDX20), GEMIN4, and GEMIN5, localizes in nuclear gems	0.07989	-0.07989	0.15055	-0.06313	0.12593	-0.08631	0.09059	-0.18508	-0.19147	0.19147	0.01336	0.24987	-0.12368	0.19677	-0.37804	-0.15927	0.01943	-0.01943	0.00895	-0.0046	-0.1003	-0.13929	-0.67221	-0.87818
I_1000458	GLCE	Protein with strong similarity to glucuronyl C5-epimerase (mouse Glce), which catalyzes the conversion of D-glucuronic acid units in the polysaccharides heparin and heparan sulfate to L-iduronic acid units	-0.11873	0.11873	-0.0433	-0.03314	-0.36809	-0.06259	0.09806	0.05484	0.15326	-0.15326	0.108	0.04504	-0.01046	-0.36937	-0.57112	-0.2898	0.05913	-0.05913	-0.32022	-0.09676	-0.23713	-0.20497	-0.54463	-0.74472
I_958030	GLRX	Glutaredoxin, glutathione-dependent hydrogen donor for ribonucleotide reductase, also catalyzes an NADPH- and glutathione reductase-dependent oxidoreduction reaction of glutathione disulfide	-0.10795	0.10795	0.0384	0.17911	-0.04751	0.15756	0.40386	0.64803	0.21299	-0.21299	0.17315	0.20429	0.09927	-0.12758	0.06407	0.36713	0.02202	-0.02202	-0.1528	-0.41166	-0.13952	-0.25735	0.555	0.48852
I_938026	GLS	Kidney-type glutaminase, catalyzes the hydrolysis of glutamine to glutamate and ammonia, provides TCA cycle intermediates, helps maintain acid-base balance, produces neurotransmitters, and initiates glutamine catabolism	0.09783	-0.09783	-0.00797	-0.15535	-0.07576	-0.27927	0.33282	-0.07433	-0.15534	0.15534	-0.10123	-0.17375	0.13613	0.15718	0.72828	0.60009	-0.12999	0.12999	-0.08232	0.06644	0.07837	0.28471	0.4705	0.67802
I_962497	GLTSCR2	Glioma tumor suppressor candidate region gene 2; the corresponding gene is located in a chromosomal region deleted in diffuse gliomas, suggesting a possible role as a glioma tumor suppressor, although no tumor-specific mutations have been identified	-0.14224	0.14225	-0.30502	-0.15563	-0.07773	-0.09315	0.21548	0.24076	0.12308	-0.12308	-0.27826	-0.36852	-0.10518	-0.19064	0.50507	0.55964	-0.0304	0.0304	-0.153	-0.12545	-0.02221	0.04984	-0.03047	-0.26724
I_966815	GMNN	Geminin, an inhibitor of DNA replication that may regulate the DNA replication process by inhibiting inappropriate firing of the replication origin through binding to CDT1	-0.00827	0.00827	-0.0448	0.02864	-0.05494	-0.05735	-0.34435	-0.39095	0.27932	-0.27932	-0.09576	-0.11072	-0.20182	-0.32732	-1.15952	-1.07692	-0.0807	0.0807	-0.0103	0.1816	-0.18388	0.02823	-1.20979	-1.19972
I_956268	GMPPB	Protein with high similarity to mannose-1-phosphate guanylyltransferase (GDP-mannose pyrophosphorylase, S. cerevisiae Psa1p), member of the nucleotidyl transferase family that contains three bacterial transferase hexapeptide (four repeats) domains	-0.00873	0.00872	0.49126	0.12598	0.06312	-0.08144	-0.36897	-0.3556	0.0292	-0.0292	0.03796	0.16227	-0.07412	-0.09299	-0.18622	-0.26513	-0.09277	0.09277	0.83309	0.48772	0.14296	0.58235	0.4513	0.68255
I_962473	GPM6B	Glycoprotein M6B, a putative membrane glycoprotein, may play a role in neuronal development, may contribute to oligodendrocyte dysfunction in Pelizaeus Merzbaoher disease; gene maps to a genomic region linked to a number of neurological diseases	0.16533	-0.16533	-0.7222	-1.1531	-0.8779	-0.41301	-1.36469	-1.17111	0.58445	-0.58445	0.58445	-1.95103	0.58445	-1.91092	-3.31204	-0.69193	-0.07068	0.07068	-1.10812	-0.09776	-1.07849	0.33082	-2.08722	-1.03411
I_929480	GPNMB	Glycoprotein (transmembrane) nmb, an integral membrane glycoprotein that is highly expressed in melanoma cell lines of low metastatic potential, may play a role in retardation of growth and attenuation of metastasis	0.05082	-0.05082	0.13019	-0.04283	-0.04399	-0.07633	0.72767	0.61414	0.36862	-0.36862	-0.08633	0.00856	-0.03279	-0.31101	0.48406	0.78183	-0.05412	0.05413	-0.54263	-0.19661	-0.37173	-0.08617	-0.18151	0.12209
I_932494	GPRK5	G protein-coupled receptor kinase 5, a protein kinase that regulates desensitization of G protein-coupled receptors by phosphorylating agonist-stimulated receptors, regulates thrombin activated signaling in endothelial cells	0.02931	-0.02931	0.46695	0.17185	0.03695	-0.13916	0.79665	0.50886	0.11854	-0.11854	0.28234	0.10397	0.19894	0.04126	0.55319	0.5277	-0.1276	0.12759	-0.34347	0.03515	-0.33183	0.0522	-0.10248	0.29596
I_1100237	GPX1	Glutathione peroxidase 1, a selenium-containing antioxidant enzyme that detoxifies peroxide in the oxidative stress response, regulates doxorubicin-induced apoptosis, deficiency may be associated with hemolytic anemia	-0.19818	0.19817	-0.22312	0.04574	-0.07024	0.07745	0.16592	0.25345	0.25116	-0.25116	-0.27464	-0.5296	-0.02551	-0.18332	0.28752	0.31648	0.02669	-0.02669	-0.07222	-0.22945	-0.15879	-0.00973	0.61973	0.66691
I_959333	GRN	Granulin, a growth factor that functions in signal transduction and positive regulation of cell proliferation, expression may be upregulated in and correlate with increased proliferation of breast cancer cells	-0.00378	0.00379	-0.35117	-0.21458	0.03242	-0.10175	0.0183	-0.08729	0.02969	-0.02969	-0.28107	-0.09636	0.02939	0.15988	0.27595	0.36305	0.01455	-0.01455	0.00556	-0.12738	0.10897	0.08664	0.27501	0.21207
I_931236	GSN	Gelsolin, a calcium-dependent protein that severs and caps actin filaments and may be regulated by phosphatidylinositol-4,5-bisphosphate binding; mutation in corresponding gene causes familial amyloidosis	0.09439	-0.09439	0.05432	-0.08299	0.16269	-0.10851	0.19247	0.21197	-0.0272	0.0272	-0.07468	0.13832	0.03941	0.10249	0.48284	0.44357	-0.03236	0.03236	-0.10933	-0.08214	-0.01743	0.12322	0.44175	0.49588
I_1000415	GTPBG3	Mitochondrial GTP binding protein, a putative GTPase that is localized to the mitochondrion, may function in tRNA modification, may contribute to the severity of deafness caused by mitochondrial 12S rRNA (MTRNR1) gene mutations	-0.09618	0.09617	0.13133	-0.15646	-0.2255	-0.22408	-0.50591	-0.47975	0.06262	-0.06262	-0.48315	-0.37094	-0.16674	-0.40296	-0.46378	-0.2731	0.07611	-0.07612	-0.29866	-0.1115	-0.3222	-0.19551	-0.56369	-0.59879
I_961917	GTSE1	G-2 and S-phase expressed 1, a cell cycle regulated, microtubule-associated protein, ectopic expression inhibits progression through the G2 to M transition of the cell cycle	-0.14882	0.14882	0.40123	0.39981	0.16804	0.26175	-0.64409	-0.50881	0.10183	-0.10183	0.08976	-0.29816	0.17337	-0.10826	0.0037	0.01297	-0.07401	0.07401	0.63273	0.49932	0.31659	0.47596	-0.72169	-0.55695
I_930154	GUCY1A2	Guanylyl cyclase alpha 2, a subunit of soluble guanylate cyclase, forms a heterodimer with beta subunits, converts GTP to cGMP in response to nitric oxide stimulation	-0.13239	0.13239	0.58587	0.32112	0.0103	-0.17593	0.28197	0.31198	0.16508	-0.16508	-0.27485	0.09571	-0.33976	-0.39718	0.01772	-0.11596	0.07688	-0.07688	1.19432	0.78013	0.26573	0.13768	-0.14615	0.3877
I_961789	H17739	Protein containing a RPEL repeat, which may be a DNA binding element, has moderate similarity to uncharacterized human KIAA1733	0.06415	-0.06415	0.36521	0.12421	0.11064	-0.2473	0.6251	0.44075	-0.05755	0.05755	0.04891	0.3143	-0.0356	0.01639	0.07323	0.03079	-0.03	0.03	-0.38169	0.10289	-0.17729	-0.10897	0.38069	0.28929
I_963983	H1FX	H1 histone family member X, involved in compaction of DNA into nucleosomes and into high-order chromatin structures, may be inovolved in transcriptional regulation, is the most distantly related H1 subtype yet identified	-0.12453	0.12453	-0.20541	0.04582	-0.17553	0.06724	-0.67027	-0.71768	-0.10417	0.10417	-0.13597	-0.11408	-0.03028	0.16711	-0.22626	-0.21251	0.06094	-0.06094	0.58386	0.26933	0.50605	0.26834	-0.31529	-0.77819
I_962206	H2AFZ	H2A histone family Z, a replication-independent variant member of the histone H2A family that may be involved in DNA packaging in the nucleus	-0.12359	0.12359	0.18715	0.1415	-0.04419	0.045	-0.36944	-0.47301	0.14852	-0.14852	0.00573	-0.1464	-0.17695	-0.12249	-0.75818	-0.88631	0.04714	-0.04714	-0.18296	-0.0129	-0.23212	-0.06363	-1.57127	-1.47987
I_930391	H2AV	Protein with high similarity to S. cerevisiae Htz1p, which is a histone-related protein involved in silencing, member of the histone family of nucleosomal core proteins	-0.14722	0.14723	-0.03255	0.0275	-0.14039	0.04853	-0.0925	-0.08259	0.17843	-0.17843	-0.12589	-0.05529	-0.1192	-0.09672	-0.21836	-0.24058	0.06438	-0.06438	-0.25547	-0.25944	-0.12697	-0.0345	-0.69814	-0.92526
I_957900	H3FL	H3 histone family member L, a component of nucleosomes, along with core histones H2A, H2B, H4 and DNA	-0.21265	0.21264	-0.08903	0.34285	-0.09809	0.56075	-0.82266	-0.24442	0.25073	-0.25074	0.97771	-0.17382	0.17177	-0.13386	-0.58231	-0.09914	-0.05156	0.05156	0.24429	0.07306	0.26444	0.08192	-0.67506	-1.04327
I_1109258	HAK	Protein containing a MHCK (myosin heavy chain kinase) or EF2 (elongation factor 2) kinase domain, has a region of low similarity to a region of human TRPM7, which is a ligand-gated cation channel that is activated by intracellular ATP	0.05133	-0.05133	0.37081	0.34361	0.06465	-0.07934	0.68295	0.56121	-0.14609	0.14609	0.42386	0.41496	0.28677	0.08663	0.75134	1.10126	-0.2071	0.20711	0.64444	-0.01724	-0.16945	-0.3014	1.04377	1.38579
I_1110109	HBP1	High mobility group (HMG) box containing protein 1, a transcription factor that activates histone H1-0 (H1F0) transcription, may have repressor function, binds to the locus control region of CD2, may modulate chromatin opening or remodeling by bending ...	0.22908	-0.22908	0.73156	0.35407	0.18239	0.58953	1.30678	1.18202	-0.02658	0.02658	-0.22383	-0.30978	-0.09797	-0.0882	0.16582	0.33047	0.10214	-0.10214	0.08577	0.1544	0.04208	0.0397	0.30983	0.85947
I_959439	HBZ	Hemoglobin zeta, a component of embryonic hemoglobin that functions as an oxygen transporter, has a high oxygen-binding affinity, levels abnormally persist in adults with the (--(SEA)/) type of alpha-thalassemia	-0.00654	0.00654	-0.59596	-0.37919	-0.21901	0.20493	-0.73259	-0.37467	0.20701	-0.20701	-0.20987	-0.28389	-0.27048	-0.24556	-0.31205	-0.2885	0.30397	-0.30397	-0.39166	-0.33986	0.07251	-0.10935	-0.85843	-0.69252
I_957866	HCAP-G	Chromosome condensation protein G, a component of the nuclear condensin complex that functions to condense mitotic chromosomes, appears to be primarily expressed in proliferative tissues, represents an immunogenic melanoma antigen	0.02026	-0.02026	0.42808	0.30878	0.11515	0.02301	-0.41726	-0.64713	0.36856	-0.36855	0.0721	0.07079	-0.04123	-0.18207	-0.63899	-0.39946	-0.11041	0.11041	0.17918	0.46961	-0.07381	0.32143	-1.30152	-1.08654
I_962756	HDGF	Hepatoma-derived growth factor, heparin-binding growth factor, induces fibroblast cell proliferation, functions in vascular development and vascular injury responses, regulates vascular smooth muscle cell growth, may play a role in radiosensitivity	-0.1104	0.1104	0.00791	0.37216	0.27673	0.15291	-0.4918	-0.13724	0.30304	-0.30304	-0.42651	-0.62088	-0.17007	-0.27554	-0.05533	-0.10514	-0.05696	0.05696	-0.00117	-0.02718	0.02404	0.08477	-0.47012	-0.47874
I_960629	HEC	Highly expressed in cancer, a nuclear protein that localizes to the centromere during M phase, inhibits proteolysis of M phase cyclin B, may be involved in chromosome segregation and M phase progression, high level expression is observed in cancer cells	-0.03585	0.03585	0.47201	0.31062	0.16688	0.27193	-0.40303	-0.51129	0.19229	-0.19229	0.12117	0.22521	0.09909	-0.00889	0.01615	0.02226	0.00461	-0.00461	0.19996	0.34549	-0.1299	0.17255	-1.48547	-1.44902
I_957403	HEF1	Enhancer of filamentation 1, a docking protein involved in integrin-induced T cell migration, binds adhesion and adaptor proteins to coordinate cell cycle with migration signals, alternative form is associated with the mitotic spindle	0.04918	-0.04917	0.09377	-0.27689	0.13691	-0.06306	0.28736	-0.23643	-0.0597	0.0597	-0.43117	-0.02894	-0.38693	-0.18204	0.11581	0.41492	0.00831	-0.00831	-0.02983	0.01812	-0.02228	0.122	0.48601	0.47743
I_932042	HELLS	Lymphoid specific helicase, a member of the SNF2-helicase family of chromatin remodeling ATPases, may play a role in leukemogenesis	-0.01373	0.01373	0.21347	0.02343	0.03823	-0.0209	-0.15916	-0.69288	-0.06134	0.06135	-0.13348	-0.01676	-0.09577	0.09419	-1.01805	-0.73206	0.16965	-0.16964	0.28308	0.33694	0.11333	0.22465	-0.43619	-0.22206
I_959712	HERPUD1	Homocysteine-inducible endoplasmic reticulum stress-inducible ubiquitin-like domain member 1, a member of the ubiquitin family, an integral membrane protein of the endoplasmic reticulum, involved in the unfolded protein stress response	0.0112	-0.0112	-0.53916	-0.61999	-0.00988	-0.1356	-0.01246	-0.19066	0.06969	-0.0697	-0.7705	-0.73928	-0.17011	-0.00542	-0.22677	-0.39796	-0.0638	0.06379	-0.73027	-0.637	-0.27357	-0.06126	0.03866	0.1273
I_928790	HF1	Complement factor H, an integrin ligand and cofactor for C3b cleavage that regulates the alternative pathway of complement activation, plays a major role in pathogen recognition, deficiency is associated with hemolytic uremic syndrome and ...	0.25835	-0.25835	0.06354	0.04414	0.37357	0.15055	0.92957	0.33859	0.01299	-0.01299	-0.35549	0.1013	-0.2035	-0.13289	0.13051	0.20273	0.0644	-0.06439	-0.42511	-0.2141	-0.42815	-0.268	0.29053	0.8247
I_928792	HFL1	H factor-like 1 (H factor-like 1), a cofactor for factor I-mediated complement component 3b (C3) cleavage that is involved in complement activation, may play a role in the chronic inflammation associated with childhood otitis media with effusion (OME)	-0.11083	0.11082	0.34136	-0.11152	-0.17021	-0.34897	0.57531	0.38707	-0.06961	0.06961	-0.59919	-0.14443	-0.65263	-0.62897	0.09232	-0.29231	-0.01239	0.01239	-0.4695	-0.37281	-0.19111	-0.03665	1.2241	1.31339
I_930051	HIBADH	3-Hydroxyisobutyrate dehydrogenase, catalyzes the NAD-dependent oxidation of 3-hydroxbutyrate to methylmalonate	-0.04524	0.04524	-0.09091	-0.00905	-0.04552	-0.00771	0.44309	0.6212	0.18389	-0.18389	-0.05146	0.01624	0.04061	-0.05444	0.26095	0.51281	0.00885	-0.00885	-0.14777	-0.26098	-0.07855	0.05969	0.29827	0.04588
I_958019	HIST1H1B	H1 histone family member 5, a linker histone involved in compaction of nucleosomes into high-order chromatin structures	-0.16213	0.16214	0.17038	0.06846	0.70312	-0.19321	-0.66899	-1.23129	-0.12791	0.12792	-0.4548	-0.62229	0.38772	0.08992	0.19258	-0.56353	-0.58259	0.58259	0.74481	1.21699	1.57779	1.06038	-2.01529	-0.24457
I_957891	HIST1H1D	H1 histone family member 3, involved in compaction of DNA into nucleosomes and into high-order chromatin structures	-0.03361	0.03361	-0.35381	0.2199	0.27217	-0.20966	-1.0969	-1.00679	0.23275	-0.23275	-0.34559	-0.65661	0.27756	0.35718	-2.1037	-1.17737	0.2029	-0.2029	1.01444	0.81404	0.4129	0.22919	-1.0423	-0.73107
I_957912	HIST1H2AC	Testis specific H2A histone family, a member of the H2A histone family of proteins that compact DNA into nucleosomes	-0.04663	0.04663	-0.43249	-0.26648	-0.13903	-0.1356	0.27315	0.36432	0.10835	-0.10835	-0.36419	-0.16727	-0.76753	-0.26667	0.15663	0.02228	0.08088	-0.08087	-0.16186	-0.09453	0.05969	-0.20028	0.07722	-0.26904
I_958001	HIST1H2AJ	H2A histone family member C, a component of nucleosomes, along with core histones H2B, H3, H4 and DNA	0.028	-0.028	-0.20176	-0.20745	0.37496	0.06966	-0.1189	-1.02087	-0.04112	0.04112	-0.86515	-0.37975	-1.32422	-0.47009	-2.30986	-1.17096	0.62327	-0.62327	-0.42261	-0.13643	-0.54254	-0.25912	-1.772	-2.20876
I_957901	HIST1H4B	H4 histone family member I, a component of nucleosomes, along with core histones H2A, H2B, H3 and DNA	-0.03195	0.03194	0.43497	0.58606	0.16719	0.22017	-0.25068	0.01273	-0.10742	0.10742	-0.39677	-0.17009	-0.01315	0.06812	-1.86066	-2.41209	0.0009	-0.0009	-0.08646	0.20457	0.06523	-0.37739	-1.31339	-1.66277
I_958017	HIST1H4L	H4 histone family member K, a component of nucleosomes, along with core histones H2A, H2B, H3 and DNA	-0.06207	0.06208	0.45434	0.4546	0.35567	0.08504	-0.41495	-0.40304	-0.17785	0.17785	-0.422	-0.27279	-0.18215	0.31128	-2.13381	-2.06575	0.03042	-0.03042	0.54573	0.45032	0.37539	-0.02352	-1.17675	-1.55376
I_930859	HIST2H2AA	H2A histone family member O, a component of nucleosomes, along with core histones H2B, H3, H4 and DNA	-0.05057	0.05057	-0.28813	-0.05617	-0.08207	-0.05258	0.00704	0.10668	0.21639	-0.2164	-0.28395	-0.29784	-0.06549	-0.14913	0.2213	0.17591	-0.05925	0.05924	-0.25347	-0.21297	0.01189	0.03118	0.39512	0.33039
I_1100635	HKE4	HLA class II region expressed gene KE4, a putative membrane protein with histidine-rich charge clusters	0.07448	-0.07449	0.27962	-0.08767	-0.91738	-0.92489	0.19352	-0.10634	0.07746	-0.07746	-0.07866	-0.04953	0.11489	0.08439	0.20232	0.34164	-0.06926	0.06926	0.15698	0.10304	-0.46466	0.03613	0.27049	0.52577
I_966958	HLA-B	Major histocompatibility complex, class I, B, an MHC heavy chain involved in the immune response; allelic variants are associated with Behcets disease and other inflammatory disorders, AIDS progression, and malaria resistance	-0.0453	0.0453	-0.30773	-0.19212	-0.12923	-0.07069	-0.32492	-0.16947	0.15456	-0.15456	-0.2727	-0.36753	-0.05774	-0.12548	0.32348	0.1872	-0.10373	0.10373	0.02558	-0.08326	0.10424	0.20471	0.49304	0.48181
I_966959	HLA-C	Human leukocyte antigen-C, heavy chain component of an MHC class I molecule that presents antigenic peptides to cytotoxic T lymphocytes; highly polymorphic gene encodes natural killer cell receptor-inhibitory alleles, resulting in target cell protection	-0.07874	0.07874	-0.21983	-0.06383	-0.30244	0.09472	-0.39174	-0.0428	0.03265	-0.03265	0.09375	0.13599	0.15516	0.08129	0.6673	0.40906	-0.05637	0.05637	0.45427	-0.03718	0.47624	0.24187	0.72046	0.62911
I_958273	HLA-E	Class I major histocompatibility complex E, a nonclassical MHC I molecule induced by gamma-interferon (IFNG), associates with beta 2-microglobulin, inhibits natural killer cell cytolytic activity; variants may be involved in type 1 diabetes mellitus	-0.04387	0.04387	-0.16904	-0.0226	-0.06812	0.02675	-0.56675	-0.21236	-0.01946	0.01946	-0.14612	0.04548	0.0769	-0.07183	0.60919	0.34319	0.10899	-0.10899	0.03838	-0.15881	0.20355	0.16597	0.69157	0.64503
I_958122	HLA-G	Class I histocompatibility antigen G, a nonclassical MHC I molecule induced by interferons and IL10, inhibits natural killer cytolytic function, may have a roles in maternal tolerance of the fetus and escape from immunosurveillance by tumors and viruses	0.03949	-0.03948	-0.03499	-0.11782	0.02865	0.05734	-0.07872	0.10425	-0.1316	0.1316	0.00364	0.22596	0.16059	0.25686	0.50956	0.38263	-0.00629	0.00629	0.13608	-0.13221	0.28883	0.05847	0.44007	0.4215
I_960917	HMG17L1	Protein containing a high mobility group 14 or 17 (HMG14 or HMG17) domain, which are found in non-histone chromatin proteins	0.13117	-0.13117	0.09795	-0.08848	-0.07851	-0.13723	0.10466	-0.19596	-0.24529	0.24529	0.02439	0.17068	-0.00447	0.20277	-0.54048	-0.27683	0.0945	-0.0945	-0.07273	-0.10739	-0.02794	0.00704	-0.53375	-0.64476
I_957632	HMGB2	High mobility group (nonhistone chromosomal) protein 2, binds undamaged and cisplatin-damaged DNA, involved with HIV-1 integration and viral replication, reacts with sera of subjects having autoimmune hepatitis disease and juvenile idiopathic arthritis	-0.12029	0.1203	0.08227	0.08474	-0.09642	0.01771	-0.17084	-0.14174	0.1359	-0.1359	-0.18123	-0.17311	-0.03593	-0.03923	-0.47296	-0.63086	0.0796	-0.0796	0.18427	0.23627	-0.04085	0.09073	-1.60431	-1.59011
I_962156	HMGB3	High-mobility group (nonhistone chromosomal) protein 4, member of the HMG 1/2 family, which have a common DNA-binding motif and bind DNA with low specificity and facilitate assembly of nucleoprotein complexes on bent DNA, may play a role in development	-0.08645	0.08646	0.00682	0.10344	0.00653	0.07196	-0.20223	-0.18713	-0.02947	0.02947	0.17291	0.10154	-0.05109	0.01344	-0.25192	-0.25833	0.10308	-0.10309	0.15674	0.17768	0.11424	0.08132	-0.87537	-1.05291
I_928635	HMGCL	3-hydroxy-3-methylglutaryl Coenzyme A lyase, cleaves 3-hydroxy-3-methylglutaryl CoA to acetoacetic acid and acetyl CoA as a last step of ketogenesis and leucine catabolism; hereditary deficiency causes acidotic attacks, hypoketotic hypoglycemia, and coma	0.01546	-0.01546	0.13914	-0.16515	0.24314	-0.08494	0.52241	0.02814	-0.34357	0.34357	-0.17788	-0.02366	0.05069	0.2532	0.39532	0.4742	-0.10147	0.10147	0.23017	0.1125	0.29094	0.32118	0.76493	0.68422
I_1221897	HMGN2	High-mobility group (nonhistone chromosomal) protein 17, member of the HMGN family, reduces chromatin compaction by binding to nucleosomes, enhances transcription and possibly DNA replication; corresponding gene may be mutated in various neoplasms	0.07221	-0.07221	-0.01537	-0.08023	-0.07721	-0.10587	-0.243	-0.28496	0.04321	-0.04322	-0.0011	-0.03237	-0.03153	0.01471	-0.30437	-0.45745	0.12937	-0.12937	0.04489	0.23585	0.0629	0.48079	-0.56559	-0.41135
I_957819	HMMR	Hyaluronan mediated motility receptor, binds hyaluronan and is important for cell motility, binds microtubules and microfilaments intracellularly, may also be involved in cell proliferation; gene mutations may contribute to colon cancer development	-0.09952	0.09952	0.41484	0.17142	0.05083	0.17966	-0.48178	-0.37717	0.17847	-0.17847	0.2268	0.32319	0.00846	-0.12372	0.52746	0.42903	0.00465	-0.00466	-0.09542	0.02004	-0.14112	-0.00265	-1.27092	-1.21338
I_961390	HMOX1	Heme oxygenase (decycling) 1, inducible isoform that cleaves the heme ring at the alpha methene bridge to form biliverdin and carbon monoxide, involved in oxidative stress response; corresponding gene mutation is associated with heme oxygenase deficiency	-0.03151	0.0315	0.82433	0.88058	-0.24362	-0.29313	0.95115	0.91511	0.0041	-0.0041	0.8336	0.94354	-0.04271	-0.05617	-0.0614	-0.04581	-0.00915	0.00915	0.08661	0.07456	-0.20984	-0.20398	0.79303	0.64335
I_958084	HN1	Protein of unknown function, has strong similarity to uncharacterized hematological and neurological expressed sequence 1 (mouse Hn1)	-0.21975	0.21975	-0.03396	0.23247	-0.03725	0.20403	-0.6319	-0.33173	0.00258	-0.00258	0.18244	0.32861	-0.04234	0.10089	-0.21495	-0.27809	0.21958	-0.21958	-0.17564	-0.49192	-0.08352	-0.55105	-0.62156	-0.86714
I_958456	HNRPAB	Heterogeneous nuclear ribonucleoprotein A/B, a member of a family of proteins that bind to pre-mRNA and regulate splicing, also interacts with APOBEC1 in the multiprotein editosome complex that edits apoB (APOB) mRNA	0.08987	-0.08987	0.4308	0.02045	-0.18813	-0.17166	-0.11947	-0.44779	-0.18004	0.18004	0.2654	0.33469	0.02963	0.24154	-0.49877	-0.36972	0.12058	-0.12058	0.48187	0.12414	0.00549	0.42018	-0.3976	-0.08186
I_962114	HNRPD	Heterogeneous nuclear ribonucleoprotein D (AU-rich element RNA-binding protein 1 37kD), an RNA and DNA-binding protein which binds to AU-rich elements in the 3 untranslated regions of mRNAs and mediates their degradation	-0.01817	0.01817	-0.00291	-0.10252	-0.06355	-0.02094	-0.11347	-0.18959	0.10302	-0.10302	-0.0045	-0.09533	-0.1382	0.03278	-0.62191	-0.57022	0.06319	-0.06319	-0.00453	0.06763	-0.08375	0.13632	-0.69564	-0.6904
I_962116	HNRPDL	Heterogeneous nuclear ribonucleoprotein D-like, an RNA- and DNA-binding protein that may play a role in mRNA biogenesis	0.04172	-0.04172	0.30821	0.06504	-0.05616	-0.00917	-0.12557	-0.17234	0.14096	-0.14096	0.06704	0.01527	-0.08882	-0.03064	-0.56986	-0.67484	-0.00088	0.00088	0.04013	0.26624	-0.04427	0.29098	-0.832	-0.68823
I_932102	HNRPF	Heterogeneous nuclear ribonucleoprotein F, an RNA binding protein which contains quasi-RRMs (RNA recognition motifs) and plays a role in pre-mRNA splicing	0.09422	-0.09422	0.17564	0.00722	-0.10646	-0.2574	0.17661	-0.00266	0.05773	-0.05772	0.05569	0.07493	-0.07436	0.01096	-0.2851	-0.24255	0.0434	-0.04341	-0.03819	0.24135	-0.17287	0.13352	-0.6603	-0.50396
I_966459	HNRPM	Heterogeneous nuclear ribonucleoprotein M, initiates recycling of internalized immature thyroglobulin for further processing through the Golgi back to the apical membrane	-0.01264	0.01264	0.03793	-0.09645	-0.00267	-0.08536	-0.01752	-0.36349	0.03486	-0.03486	-0.04729	0.02299	-0.09263	0.02425	-0.32567	-0.39266	0.0249	-0.0249	-0.01937	0.05987	-0.14652	0.18791	-0.59215	-0.46869
I_928642	HNRPR	Heterogeneous nuclear ribonucleoprotein R, a putative pre-mRNA processing protein that contains three RNA recognition domains and an RGG domain, interacts with survival motor neuron protein, may act as an autoantigen in autoimmune disease	0.00249	-0.00248	0.11893	0.21935	0.16051	0.01371	-0.34613	-0.28464	0.11614	-0.11614	-0.09638	-0.23584	-0.07475	0.11684	-0.22677	-0.2211	-0.02335	0.02335	0.06118	0.15417	0.10722	0.17421	-0.49355	-0.53579
I_1100492	HNRPU	Heterogeneous nuclear ribonucleoprotein U (scaffold attachment factor A), binds RNA, binds EP300 in a complex that binds scaffold-matrix attachment regions of TOP1, involved in chromatin structure, apoptosis, and perhaps RNA processing and transcription	0.01434	-0.01433	0.14667	0.06103	0.02563	-0.13802	-0.10418	-0.19442	0.104	-0.10399	0.03297	0.00464	-0.10734	0.01627	-0.18903	-0.05071	-0.02973	0.02973	0.1175	0.15477	-0.00965	0.19928	-0.61272	-0.57573
I_966067	HPRT1	Hypoxanthine guanine phosphoribosyltransferase, a purine salvage pathway enzyme that may be involved in hematopoiesis; mutations in the corresponding gene cause Lesch-Nyhan syndrome, Kelley Seegmiller syndrome, and a form of gout	-0.01471	0.01471	0.136	0.10941	0.10311	-0.05142	0.09741	-0.17518	-0.16561	0.16561	-0.0347	0.05437	-0.11664	0.11739	-0.57578	-0.50061	0.03943	-0.03943	0.09141	0.01505	0.04259	0.00102	-0.40718	-0.51556
I_944138	HRH1	Histamine H1 receptor, G protein-coupled receptor that stimulates the synthesis of inositol phosphate, decreased expression in brain correlates with loss of cognitive function in Alzheimer disease, antagonism by drugs is used in treatment of hay fever	-0.074	0.07401	0.70157	0.36485	0.06954	-0.28128	0.35162	0.13752	0.02145	-0.02146	0.76533	0.45403	0.03773	-0.11726	0.10824	0.13212	0.00412	-0.00413	0.63824	0.56705	0.3079	0.41181	0.59713	1.8117
I_958786	HSBP1	Heat shock factor binding protein 1, binds to active trimers of heat shock factor 1 (HSF1), negatively regulates the heat shock response by repressing HSF1 transactivating activity	0.0427	-0.04271	0.09983	-0.13711	-0.07083	0.00027	0.71544	0.62002	0.16477	-0.16478	0.02058	0.11564	0.0564	-0.07207	0.31469	0.70009	-0.11346	0.11346	-0.09596	-0.1033	0.01567	0.13426	-0.05485	-0.06878
I_959914	HSD17B2	17 Beta-hydroxysteroid dehydrogenase type 2, catalyzes conversion of high activity 17 beta hydroxy forms of sex steroids to less potent ketosteroids, also has 20 alpha-HSD activity, downregulated in prostate cancer, colon cancer, and endometriosis	-0.02536	0.02536	-0.86028	-0.19513	-0.16194	0.0481	-0.23311	-0.12959	-0.07986	0.07986	-0.70214	-0.37725	-0.31339	-0.22493	-0.48771	-0.0989	0.19278	-0.19279	0.25352	-0.52122	0.35153	0.10553	-0.07699	-0.66194
I_1002221	HSP70-4	Member of the Hsp70 family, which are stress-induced protein chaperones, has low similarity to S. cerevisiae Ssa3p, which is a heat-induced cytoplasmic chaperone not expressed under optimal conditions	-0.05472	0.05473	0.19418	0.13884	0.20639	0.0136	-0.05751	-0.17247	0.14937	-0.14938	0.13172	0.21304	-0.03741	-0.05385	-0.48732	-0.3578	-0.03326	0.03326	-0.01454	0.1087	-0.12516	-0.00534	-0.6649	-0.61644
I_930409	HSPA8	Heat shock 70kD protein 8, a constitutively expressed member of the heat shock HSP70 family of molecular chaperones; expression is elevated in the hearts of patients with hypertrophic cardiomyopathy	-0.14889	0.14889	0.17808	0.16654	0.14867	0.10783	-0.20424	-0.33301	0.02006	-0.02007	-0.07272	-0.39333	0.01631	0.0971	-0.3658	-0.41561	0.02243	-0.02243	-0.06931	0.01445	-0.16934	-0.03	-0.68229	-0.64746
I_963434	HSPB3	Heat shock 27kD protein 3, putative heat shock protein that may be involved in stress response and muscle development	0.10899	-0.10899	1.20428	0.48217	0.27421	0.29611	0.94745	1.06983	0.00296	-0.00296	0.52093	0.29272	0.37168	0.37683	1.41785	0.97014	-0.20752	0.20751	-0.19759	0.12869	-0.10933	0.04379	-0.46267	0.11545
I_1221916	HSPC039	Protein of unknown function, has moderate similarity to uncharacterized S. pombe Spac19a8.09p	0.03712	-0.03712	0.20941	0.08611	-0.05477	-0.02361	0.47598	0.30204	0.14788	-0.14788	0.01493	0.11241	-0.04882	-0.1026	-0.38876	-0.52201	0.02145	-0.02144	-0.3155	0.02996	-0.26208	0.04559	-0.54541	-0.43009
I_958510	HSPC065	Protein of unknown function, has high similarity to uncharacterized mouse 4933409I22	-0.04514	0.04514	-0.1887	0.00311	0.34885	0.0508	0.16792	-0.02163	-0.0122	0.0122	0.0511	0.09931	0.11227	0.11313	0.39725	0.07194	-0.05932	0.05932	0.1062	0.29379	0.25448	0.16158	0.56165	0.80571
I_1110344	HSPC111	Protein of unknown function, has low similarity to uncharacterized C. elegans ZK265.6	-0.06084	0.06084	0.08287	0.24959	-0.12479	-0.03083	-0.16663	-0.14589	0.14609	-0.1461	0.17381	0.02204	-0.14151	-0.24907	-0.28651	-0.37213	-0.0422	0.0422	-0.17786	0.0234	-0.02014	-0.06666	-0.57092	-0.57593
I_946324	HSPC128	HSPC128 protein, interacts with thyroid transcription factor 1 (TITF1) and functions as a transcriptional activator, activates surfactant pulmonary-associated protein B (SFTPB) expression	0.02415	-0.02415	-0.02432	-0.01562	0.01523	-0.061	0.14722	0.05096	0.0389	-0.03889	-0.14415	-0.09347	-0.24	-0.08959	-0.54623	-0.26503	0.00155	-0.00155	-0.14197	-0.12286	-0.1192	-0.20219	-0.53542	-0.66093
I_929756	HSPC150	Protein with high similarity to S. cerevisiae Ubc13p, which is a ubiquitin-conjugating (E2) enzyme involved in the S. cerevisiae Rad6 dependent post-replicative repair pathway, member of the ubiquitin-conjugating enzyme (E2) family	0.06861	-0.06862	0.15005	0.0488	0.14376	0.01148	-0.37681	-0.45377	-0.15593	0.15592	-0.29509	-0.19927	-0.21484	0.13866	-0.7272	-0.7387	0.01894	-0.01895	0.24004	0.17408	-0.06127	-0.03462	-1.02091	-1.24571
I_960692	HSPC154	Protein of unknown function, has high similarity to uncharacterized mouse 2700002I20Rik	0.09241	-0.09241	0.20409	-0.04033	0.07501	-0.1085	0.10809	-0.05603	-0.04824	0.04825	-0.01197	0.13708	-0.17365	0.03497	-0.47721	-0.43374	0.03042	-0.03042	0.13829	0.13905	-0.05551	0.15136	-0.48952	-0.35699
I_958648	HSPCA	Heat shock 90kD protein 1 alpha, a molecular chaperone that mediates protein folding, involved in activation of the caspase cascade, upregulated in breast and oral cancer cell lines	0.03995	-0.03995	0.30715	0.10572	0.08011	0.01063	-0.00792	-0.0597	-0.07784	0.07784	0.0183	0.02321	-0.09057	0.18812	-0.35732	-0.4581	0.08077	-0.08077	0.19921	0.26353	0.11299	0.25966	-0.30976	-0.29522
I_928707	HSPE1	Chaperonin 10, member of the heat shock family of molecules, a mitochondrial protein that may interact with chaperonin 60 (HSPD1) to refold denatured proteins	-0.17068	0.17069	-0.00576	0.08987	-0.07355	0.04488	-0.17474	-0.19061	0.21749	-0.2175	-0.15619	-0.23432	-0.14053	0.0998	-0.4381	-0.54356	0.0421	-0.0421	-0.14237	-0.15343	-0.13807	-0.06144	-0.63283	-0.77552
I_942691	HSPG2	Heparan sulfate proteoglycan 2 (perlecan), a basement membrane protein that acts as coreceptor for FGF, overaccumulation in the brain is associated with Downs syndrome and Alzheimers while a variant form is associated with dyssegmental dysplasia	0.00277	-0.00278	0.25622	0.31537	0.53764	0.19564	0.54191	0.48919	0.14265	-0.14265	0.20518	0.0669	0.16784	0.18575	0.5922	-0.01554	-0.04424	0.04424	0.05334	0.12431	-0.0723	0.15424	0.23842	1.20695
I_960698	HSPH1	Heat shock protein (105 kDa), member of the high molecular weight family of heat shock proteins, expression is induced by heat shock and is increased in cancer cells	0.04931	-0.04931	0.08724	-0.14815	-0.08251	-0.13664	0.01508	-0.30734	0.11571	-0.11571	0.04552	0.16186	-0.24478	-0.14472	-0.57512	-0.49166	-0.05844	0.05843	-0.07572	0.01987	-0.29529	-0.01571	-0.57709	-0.42697
I_948675	HT021	Protein of unknown function, has high similarity to uncharacterized mouse 3830406C13Rik	-0.04901	0.04901	0.04065	0.02187	-0.12055	-0.0222	-0.02858	-0.26916	0.35095	-0.35095	-0.18803	-0.43303	-0.22479	-0.36037	-0.95443	-0.89518	-0.16362	0.16362	-0.33184	-0.03425	-0.28163	0.03487	-0.49112	-0.34634
I_960039	HUMGT198A	Tat binding protein-1 interacting protein, likely to bind Tat binding protein-1 (TBP), may enhance the inhibition of HIV-1 Tat-mediated transactivation by (TBP)	-0.01168	0.01168	0.13229	0.18261	0.0261	-0.08806	-0.63077	-0.6931	0.25734	-0.25734	-0.08191	-0.23226	-0.13486	-0.28414	-1.28449	-1.18214	-0.09992	0.09993	-0.01822	0.23586	-0.22497	0.02922	-1.13274	-1.02597
I_959677	HUMNPIIY20	Leukocyte platelet-activating factor receptor, a putative seven-transmembrane domain receptor that binds the phospholipid, platelet-activating factor	-0.03235	0.03235	-0.14641	-0.13861	-0.09848	-0.09095	-0.33826	-0.13039	-0.11501	0.115	0.11461	0.25767	0.20607	0.19899	0.55279	0.67261	-0.05249	0.05249	0.40777	-0.17958	0.37923	0.05911	0.74794	0.7767
I_1000049	I_1000049	Protein of unknown function	-0.02506	0.02506	-0.32662	-0.10294	0.11001	-0.01952	0.3413	0.13833	0.14578	-0.14578	-0.07217	-0.22898	0.0947	-0.07442	-0.07764	0.11323	-0.08953	0.08953	-0.30458	-0.34356	-0.20799	-0.07587	0.3241	0.53732
I_1000177	I_1000177	Protein containing a G-patch domain, which are found in RNA processing proteins	0.07268	-0.07268	0.11943	0.02975	0.03048	-0.10384	-0.0487	-0.18005	0.21223	-0.21223	0.22144	0.24382	-0.09481	-0.18718	-0.36578	-0.22882	-0.14949	0.14949	-0.15609	0.0422	-0.31682	-0.02495	-0.76012	-0.69115
I_1000506	I_1000506	Protein with high similarity to odorant receptor 83 (mouse Or83), which is a putative olfactory receptor that is expressed in distinct regions of the olfactory epithelium, member of the rhodopsin family of G protein-coupled receptors (GPCR)	-0.29318	0.29318	1.20237	0.14015	-0.09354	-0.79956	0.12729	0.64523	-0.12395	0.12395	1.70012	0.11926	-0.73036	-0.56985	0.20687	0.52398	-0.31527	0.31527	-0.31527	0.67996	0.63979	0.21871	0.74465	-0.59781
I_1000547	I_1000547	Protein of unknown function	0.07735	-0.07735	1.4678	0.57209	0.34108	0.23334	0.75549	0.67602	0.0145	-0.0145	0.67254	0.42877	0.49854	0.2876	0.77608	0.32734	-0.22456	0.22456	-0.16515	0.26713	-0.32655	0.31259	0.61653	1.26605
I_1000600	I_1000600	Protein of unknown function	0.14413	-0.14413	1.01112	1.30981	1.06226	-0.07683	0.86524	-0.47735	-0.3705	0.3705	0.7222	0.23226	-0.71469	0.04871	-0.56628	-0.51825	-0.1515	0.15149	-0.3072	1.10706	-0.81223	-0.36071	-0.9114	-1.67132
I_1000701	I_1000701	Retired, was GABA(A) receptors associated protein like 3, putative tubulin binding protein that may be involved in intracellular protein transport	0.03737	-0.03738	0.04561	-0.00737	0.03993	-0.09508	0.80105	0.60791	-0.05841	0.0584	-0.19318	0.14119	-0.05503	0.1566	0.42289	0.36468	0.01996	-0.01996	0.07894	-0.1461	-0.05836	0.04463	0.18535	0.19871
I_1100453	I_1100453	Protein containing two PHD-fingers, which may be involved in chromatin-mediated transcriptional regulation, has moderate similarity to PHD finger protein 1 (human PHF1), which binds Enhancer of Zeste (Drosophila) homolog 2 (human EZH2)	-0.12903	0.12903	0.12314	0.08429	0.18315	0.06859	-0.32438	-0.45023	-0.09879	0.09878	0.00523	0.06414	0.00108	0.15138	0.02181	-0.02768	0.04177	-0.04177	0.29632	0.14108	0.20122	0.14328	-0.20947	-0.24875
I_1100459	I_1100459	Retired, was Member of the putative 5-3 exonuclease domain containing family, has moderate similarity to exonuclease II (S. pombe Exo2p), which is a single-stranded DNA exonuclease possibly involved in DNA damage repair and recombination	-0.2213	0.22131	0.18124	0.51495	0.40821	0.11546	0.77196	0.54488	0.22898	-0.22899	0.0216	-0.44675	0.0156	-0.17552	-0.19999	0.06037	-0.06623	0.06623	0.02118	0.10707	-0.07439	0.14812	0.55649	0.71612
I_1100500	I_1100500	Protein containing two C2 domains, and a phorbol esters or diacylglycerol binding domain (C1 domain), which bind two zinc ions, has moderate similarity to C. elegans UNC-13, which is important for locomotion via its involvement in synaptic transmission	-0.03892	0.03892	-0.06971	-1.19065	0.31075	0.31075	0.15783	0.31075	0	0	0	0	0	0	0	0	0	0	0	0	0	0	-1.58176	-1.02075
I_1100573	I_1100573	Retired, replaced by A_23_P319432, was H2A histone family member X, member of the H2A histone family that compact DNA into nucleosomes, phosphorylated form localizes to DNA double-strand breaks, may be involved in repair of double-stranded breaks ...	0.07005	-0.07005	0.3781	0.1318	-0.04163	-0.13542	-0.27172	-0.36581	0.05541	-0.05541	-0.11341	-0.01749	-0.28298	-0.1625	-0.657	-0.56062	0.08271	-0.0827	-0.07176	0.15876	-0.08001	0.10071	-0.88529	-0.75885
I_1100649	I_1100649	Protein with strong similarity to heavy chain MHC class I molecule (human HLA-B), which associates with beta 2-microglobulin and presents peptides to CTLs, contains an immunoglobulin (Ig) and class I histocompatibility antigen domains alpha 1 and 2	-0.06124	0.06125	-0.2116	-0.17516	-0.1565	0.09939	-0.2076	0.06366	0.01809	-0.01809	-0.11343	0.05107	0.01695	0.19565	0.51082	0.26123	0.07094	-0.07094	0.10116	-0.30856	0.19019	0.04766	0.49028	0.44094
I_1100730	I_1100730	Retired, was Muscle-type acylphosphatase 2, hydrolyzes acyl phosphates, likely involved in cell differentiation and apoptosis, localized mainly to the nucleus	0.08993	-0.08992	0.48094	0.01136	0.29612	0.07006	1.11814	0.50769	-0.33259	0.33259	0.18989	0.21552	0.28504	0.26851	0.32599	0.65771	0.0508	-0.0508	-0.42915	-0.39245	-0.45731	-0.16125	0.18839	0.43726
I_1100855	I_1100855	Retired, replaced by A_23_P395595, was Protein with strong similarity to formin binding protein 4 (mouse Fnbp4), which is an SH3/SH2 adaptor protein, contains two WW domains, which bind proline-rich peptides	-0.16596	0.16596	0.37444	0.44117	0.16072	0.0954	-0.0034	-0.11449	0.50789	-0.50789	0.23497	0.172	0.12395	-0.2373	-0.24499	0.30437	-0.10628	0.10627	0.40132	0.42713	-0.06667	0.24885	-0.53657	-0.42209
I_1109181	I_1109181	Protein with strong similarity to erythrocyte protein band 4.1-like 1 (mouse Epb4.1l1), which is a GTPase inhibitor, contains a spectrin and actin binding (SAB) domain and a FERM (Band 4.1) domain, which link cytoplasmic proteins to membranes	-0.03206	0.03206	-0.07141	-0.08937	-0.07362	-0.01012	0.47309	0.20706	0.16407	-0.16407	-0.05462	-0.14738	0.04199	-0.07875	0.22315	0.12587	-0.10887	0.10886	-0.39257	-0.22472	-0.27793	-0.03086	0.37273	0.53542
I_1109287	I_1109287	Protein of unknown function, has very strong similarity to uncharacterized human FLJ14502	0.01525	-0.01525	0.40545	0.32795	0.27085	0.13695	-0.49569	-0.62843	0.24415	-0.24415	0.16453	0.16918	0.10029	-0.12447	0.10502	0.20177	-0.09668	0.09668	0.00296	0.26916	-0.1122	0.21005	-0.77362	-0.56921
I_1109356	I_1109356	Protein of unknown function	-0.20369	0.20369	0.47888	0.37791	0.03291	0.03277	-0.02782	-0.3041	0.08322	-0.08322	0.09145	-0.16229	0.18549	-0.17299	-0.19433	-0.25163	-0.07127	0.07127	0.12057	0.3239	-0.00444	0.20701	-0.34586	-0.09711
I_1109377	I_1109377	Protein containing 9 C2H2 type zinc finger domains, which bind nucleic acids, has a region of low similarity to a region of zinc finger protein subfamily 1A 5 (human PEGASUS), which acts as a transcriptional repressor	0.03358	-0.03358	-0.48207	-0.3969	0.01034	-0.15661	0.46662	0.36287	0.15508	-0.15508	-0.48325	-0.35939	-0.06301	-0.20596	0.00613	0.11022	-0.00798	0.00798	-0.38488	-0.15574	0.20065	0.23685	0.22313	0.41972
I_1109380	I_1109380	Protein of unknown function	-0.02993	0.02993	-0.81878	-0.54901	-0.58763	-0.43559	0.06405	0.05043	0.2082	-0.2082	-0.01397	-0.17859	-0.02551	-0.28873	0.6006	0.6302	0.04202	-0.04202	-0.48233	-0.37165	-0.17662	0.05082	0.2756	0.3681
I_1109432	I_1109432	Protein containing a MIZ zinc finger domain, has a region of weak similarity to protein inhibitor of activated STAT3 (mouse Pias3), which inhibits STAT3-mediated and (Mitf)-mediated gene transcription by blocking their binding to DNA	-0.02652	0.02651	0.12983	0.12164	-0.04498	-0.12447	0.52962	0.28084	0.20792	-0.20792	0.32709	0.26537	-0.1972	-0.29752	-0.35693	-0.33367	-0.07469	0.07468	-0.00095	0.18069	-0.34265	-0.07029	-0.49429	-0.25971
I_1109532	I_1109532	Protein with high similarity to rho GTPase activating protein 4 (human ARHGAP4), which inhibits actin stress fiber organization, contains a Fes or CIP4 homology domain, a RhoGAP (GTPase activator protein) domain, and an Src homology 3 (SH3) domain	-0.07747	0.07747	0.22688	0.35377	0.02919	-0.15439	0.1214	0.10775	-0.03008	0.03008	0.02172	-0.14493	0.08382	0.14933	0.36838	0.23427	-0.10292	0.10293	-0.3386	0.11354	0.50617	0.29023	0.98129	0.62975
I_1109768	I_1109768	Retired, was Metallothionein 1H, a member of the metallothionein 1 family of cysteine-rich heavy metal-binding proteins that function in metal ion homeostasis and protect against heavy-metal toxicity	-0.09456	0.09456	-0.04646	0.25192	0.09228	0.05195	-1.02994	-0.84913	-0.25671	0.25672	-0.09477	0.1126	-0.09703	0.39023	-0.56519	-0.33897	-0.27579	0.27579	0.04853	-2.93078	-0.26541	-0.15617	-0.64201	-0.33798
I_1109838	I_1109838	Protein with strong similarity to dihydrofolate reductase (mouse Dhfr), which catalyses NADPH-dependent reduction of dihydrofolate to tetrahydrofolate, member of the dihydrofolate reductase family	0.09095	-0.09096	0.28021	0.14615	0.04361	0.31244	-0.11152	0.06305	-0.03635	0.03636	0.28627	0.27226	0.06071	0.08296	-0.74292	-0.06909	0.00532	-0.00532	0.27219	-0.1891	-0.00577	-0.20269	-0.45696	-0.67034
I_1109959	I_1109959	Retired, was Member of the rhomboid family of integral membrane proteins	-0.04423	0.04423	0.44989	0.34481	-0.06876	-0.06085	0.23727	0.32436	0.04692	-0.04693	-0.19622	-0.14695	-0.31331	-0.29011	0.01576	-0.05438	-0.03336	0.03336	0.20319	0.40675	-0.11385	0.15169	1.17271	0.65004
I_1110058	I_1110058	Retired, was Angiopoietin-like 4, a liver-specific secreted glycoprotein, has a role in protecting vascular endothelial cells from apoptosis, may have a role in the regulation of lipid metabolism	0.03025	-0.03025	-0.08364	0.06177	-0.63254	-0.29791	-0.8151	-0.62115	-0.04058	0.04057	0.23893	0.15407	0.05531	-0.18764	0.09878	0.14559	-0.04236	0.04236	0.49708	0.31321	-0.02418	-0.20132	1.42863	1.2912
I_1110068	I_1110068	Member of the rhodopsin family of G protein-coupled receptors (GPCR), has high similarity to uncharacterized mouse MOR145-1, which is a putative olfactory receptor and class A orphan receptor and may function in olfaction	0.12218	-0.12218	0.14063	-0.65522	0.13713	-0.16387	0.44229	0.54157	-0.15174	0.15174	0.11329	0.18062	0.02133	0.26507	0.39801	0.13025	-0.08121	0.08121	-0.10896	-0.0084	-0.08414	0.04752	0.1644	0.6648
I_1151871	I_1151871	Protein with high similarity to zinc finger protein 136 (human ZNF136), which is a transcriptional repressor, contains 17 C2H2 type zinc finger domains, which bind nucleic acids, and a kruppel-associated box (KRAB) domain	-0.12513	0.12513	-0.23502	-0.00361	-0.01713	0.18839	-0.17635	-0.80401	0.41783	-0.41783	-0.37117	-0.09653	0.00035	-0.2777	-0.13538	-0.13388	-0.09102	0.09102	-0.42191	0.11859	-0.02638	-0.09818	-0.71201	-0.58466
I_1151929	I_1151929	Protein with strong similarity to neuronal guanine nucleotide exchange factor (mouse Ngef), which transforms cells and induces tumors, contains a RhoGEF (GTPase exchange factor) domain, a pleckstrin homology (PH) domain, and a Src homology 3 (SH3) domain	-0.13778	0.13779	-0.5106	-0.05528	-0.22019	-0.04255	-0.40669	-0.44531	0.15721	-0.15721	0.12996	-0.23878	-0.04901	-0.10447	-0.52705	-0.66171	0.08672	-0.08672	-0.31408	-0.1096	0.1622	0.02619	-0.98233	-0.87402
I_1152041	I_1152041	Retired, was Member of the ATPase family associated with various cellular activities, has a region of weak similarity to S. cerevisiae Rpt4p, which is a component of the 19S regulatory cap complex of the 26S proteasome complex and acts in ...	0.03018	-0.03018	0.09352	0.03224	-0.18335	-0.02375	-0.89038	-0.62664	-0.13019	0.13019	-0.04834	0.11196	0.03029	-0.06081	-0.31763	-0.22109	-0.02077	0.02077	0.1599	-0.07313	0.30688	-0.02823	0.00396	-0.19715
I_1152107	I_1152107	Protein of unknown function	0.1602	-0.1602	-0.12927	-0.32929	0.25415	0.05454	0.6416	0.58215	0.05675	-0.05675	-0.03502	-0.16387	0.44026	0.17701	0.55931	0.32447	-0.25298	0.25298	-0.25851	0.0495	-0.20788	0.11729	0.35398	0.73469
I_1152190	I_1152190	Retired, was Protein with very strong similarity to beta 1 subunit of Na+/K+-ATPase (rat Atp1b1), which is involved in ion concentration homeostasis and augments liquid clearance in lungs, member of the Na+,K+ ATPase beta subunit family	-0.03909	0.03908	-0.26962	-0.18369	-0.18964	-0.13521	-0.34863	-0.54513	0.18526	-0.18527	-0.2414	-0.23675	-0.16839	-0.05716	-0.56717	-0.51535	-0.02406	0.02406	-0.03634	0.1214	-0.11158	-0.06353	-0.36202	-0.43523
I_1152270	I_1152270	Retired, was Protein of unknown function, has strong similarity to uncharacterized mouse Banp	0.0484	-0.0484	-0.85443	-0.79919	-0.01613	-0.0765	0.00038	0.00467	0.02979	-0.02979	-0.6975	-0.51337	0.09567	0.12798	-0.19231	0.04861	-0.08951	0.08951	-0.19262	-0.48138	0.13273	0.08516	-0.08657	-0.22943
I_1152582	I_1152582	Retired, was High mobility group protein 1, binds DNA with low specificity and induces DNA bending, activates and represses transcription, involved in the DNA damage response and mediates the toxicity of endotoxins; abundance is increased in septic ...	-0.06335	0.06335	0.06194	0.14874	-0.07952	0.04391	-0.19045	-0.2208	0.32378	-0.32378	-0.16593	-0.37846	-0.12944	-0.28752	-0.51966	-0.56518	-0.07165	0.07165	-0.13491	0.05819	-0.16062	0.1166	-0.87466	-0.73125
I_1201901	I_1201901	Retired, was Protein of unknown function, has high similarity to uncharacterized human MGC:5244	-0.02019	0.0202	0.54682	0.1729	0.44638	0.20663	-0.56911	0.14434	-0.11086	0.11086	0.37202	0.38836	0.37613	0.43518	0.59777	0.53316	-0.13364	0.13364	0.40661	0.12075	0.61695	0.26849	1.14986	1.14415
I_1899251	I_1899251	Retired, was Protein of unknown function, has strong similarity to uncharacterized mouse Fbxo18	-0.01344	0.01344	0.33434	0.0361	-0.00083	0.17564	-0.01095	0.16982	-0.00514	0.00514	0.254	0.13373	0.11678	0.20657	0.45162	0.322	-0.15679	0.1568	0.35581	0.28383	0.44615	0.51586	0.76231	0.51491
I_928513	I_928513	Protein with very strong similarity to UDP-N-acetyl-alpha-D-galactosamine:polypeptide N-acetylgalactosaminyltransferase (human GALNT5), member of the glycosyl transferase family 2, contains 2 QXW (ricin B) lectin repeat domains	0.30428	-0.30428	1.23532	0.63854	0.67074	0.22024	0.89768	1.51561	-0.04962	0.04961	0.03348	0.12302	0.63843	0.37775	1.23804	0.88252	-0.35783	0.35784	-1.01031	-0.86899	-1.01241	-0.08217	0.29475	-0.0272
I_928519	I_928519	Protein with strong similarity to plasmacytoma-associated neuronal glycoprotein (rat Cntn3), which is a neuronal adhesion molecule, contains four fibronectin type III domains, which are involved in cell surface binding, and six immunoglobulin (Ig) ...	0.01914	-0.01914	0.15194	0.10032	0.16524	-0.17435	0.49096	0.46447	-0.00738	0.00739	0.16111	-0.00249	-0.05154	0.63274	0.65847	0.31767	-0.16201	0.162	-0.24888	0.07821	-0.16415	0.094	-0.04664	-0.69454
I_928675	I_928675	Protein containing 25 ankyrin (Ank) repeats, which may mediate protein-protein interactions, has low similarity to a region of C. elegans UNC-44, which is an ankyrin that is required for axonal guidance and axon fasciculation	-0.0395	0.0395	0.59977	0.42889	0.42393	0.06128	0.51732	0.14465	-0.27969	0.27969	0.01896	-0.07277	-0.13397	0.07601	0.45721	0.48198	0.00828	-0.00828	0.07204	0.01879	-0.29828	-0.10408	0.21525	0.21562
I_928791	I_928791	Retired, was Complement factor H related protein 3, a secreted heparin-binding glycoprotein containing five short consensus repeats (SCRs), binds C3b-opsonized pneumococci and interacts with streptococcal M proteins, cofactor for factor I-mediated C3b ...	-0.08831	0.08831	0.92376	0.38274	0.58603	0.13044	1.26543	0.74326	-0.03391	0.03392	0.13495	0.06814	-0.0836	-0.22321	0.11717	0.14615	0.12739	-0.12738	0.22089	0.15378	-0.05788	0.14598	1.3537	2.92353
I_928959	I_928959	Retired, was Protein that may play a role in mRNA splicing, interaction with the nonstructural NS1 protein of the influenza A virus in infected cells results in the relocation of the protein from the cellular splicing apparatus to other regions within ...	0.01049	-0.01048	0.08063	-0.03756	-0.16332	-0.16709	0.09092	-0.41964	0.03188	-0.03188	-0.08214	0.01792	-0.25955	-0.0857	-0.46621	-0.24129	0.03006	-0.03006	0.1771	0.25226	-0.12015	0.11837	-0.39306	-0.42809
I_929351	I_929351	Protein with strong similarity to lunatic fringe (mouse Lfng), which may function in the Notch signaling pathway, member of the Fringe-like family, which may be involved in controlling the response of the Notch receptor to specific ligands	-0.08528	0.08527	0.84555	0.78342	-0.19762	-0.06366	0.21122	0.13789	0.13234	-0.13234	0.94444	1.01525	-0.42641	-0.21066	-0.49854	-0.30932	0.09545	-0.09546	0.25132	0.45892	0.69721	0.56774	-0.21834	-0.48577
I_929594	I_929594	Protein containing 12 C2H2 type zinc finger domains, which bind nucleic acids, has a region of moderate similarity to a region of mouse Zfp287, which is a Kruppel-type zinc finger transcription factor that regulates the expression of cytokines in T cells	0.03961	-0.03961	-0.57407	-0.2704	-0.629	-0.30494	-0.89788	-0.97361	-0.05918	0.05917	-0.58118	-0.27088	-0.22039	-0.45983	-0.60027	-0.21146	0.18196	-0.18196	-0.0905	-0.37618	0.08914	-0.42745	-0.48096	-0.36552
I_930232	I_930232	Protein with high similarity to olfactory receptor 4 cluster (gene 3) (mouse Olfr4-3), which is an olfactory receptor that induces an increase in cytosolic calcium ion concentration, member of the rhodopsin family of G protein-coupled receptors (GPCR)	0.24705	-0.24706	-0.80032	-0.32738	-0.75103	-0.6212	-0.54857	-0.84838	-0.03104	0.03104	0.16636	-0.07596	0.10259	0.08343	0.15817	0.35186	-0.2963	0.2963	-0.41783	-0.15976	-0.23103	-0.25232	-1.43872	-2.0712
I_930261	I_930261	Protein of unknown function	-0.01859	0.01859	-0.00761	-0.07206	0.04623	-0.13426	0.15144	0.1238	0.01179	-0.01179	-0.22685	-0.122	-0.1066	-0.03966	0.16783	0.09385	-0.01062	0.01061	-0.13364	-0.07119	0.01508	0.11533	0.46125	0.43858
I_930372	I_930372	Protein of unknown function	0.06586	-0.06586	0.06661	-0.13445	0.01514	-0.07512	0.80103	0.90921	0.12838	-0.12838	-0.03689	-0.17944	0.01792	-0.26312	0.56132	0.75382	-0.04574	0.04574	-0.06752	0.08134	0.01048	0.22467	0.08149	0.42971
I_931341	I_931341	Protein containing a fibronectin type III domain, which are involved in cell surface binding	-0.13368	0.13367	0.41761	-0.03727	0.35055	-0.01695	1.19808	0.69911	-0.0612	0.0612	0.02313	-0.38028	0.17897	0.002	1.30132	1.11988	-0.22958	0.22958	-0.68461	-0.47435	-0.85516	-0.27645	0.48158	0.92691
I_932099	I_932099	Protein with high similarity to human HNRPA1, which is a heterogeneous nuclear ribonucleoprotein that may function as an RNA carrier during export from the nucleus to the cytoplasm, contains an RNA recognition motif (RRM, RBD, or RNP) domain	-0.06051	0.06051	0.05488	0.04586	-0.03458	-0.00415	-0.11801	-0.19991	0.05173	-0.05173	-0.07503	-0.23182	-0.12798	0.00646	-0.54127	-0.596	0.07769	-0.07769	-0.11891	-0.04296	-0.20092	-0.02122	-0.88117	-0.86149
I_932119	I_932119	Retired, was Protein with high similarity to n-acetylgalactosaminyltransferase T-2 (human GALNT2), which initiates O-glycosylation, member of the glycosyl transferase family 2, contains three QXW (ricin B) lectin repeat domains	-0.00211	0.00211	-1.09188	-0.55701	-0.31344	-0.19769	-0.65672	-0.73749	-0.1923	0.1923	-0.3451	0.05202	0.25942	0.10119	0.21468	-0.01474	0.3589	-0.3589	-0.30561	-0.28641	-0.29708	-0.41304	-1.54976	-1.70329
I_932580	I_932580	Protein containing 2 immunoglobulin and 2 protein kinase domains, has a region of low similarity to death associated protein kinase-related protein (human DAPK2), which is a calmodulin-regulated serine-threonine kinase that may be involved in apoptosis	-0.12363	0.12363	0.52007	-0.6276	0.34252	-0.30555	-0.37007	0.63328	-0.11948	0.11947	-0.59196	-0.19144	-0.20149	-0.20524	-0.82956	-0.81542	-0.10921	0.10921	-0.0934	0.23135	0.09734	0.53412	-0.46558	-1.55032
I_934635	I_934635	Retired, replaced by A_23_P351844, was CD1B antigen b polypeptide, a lipid antigen presenting molecule that binds and presents lipid and glycolipid antigens to T cells, involved in cellular defense response, may play a role in the development of ...	-0.03758	0.03759	-0.76529	-0.6449	-0.19103	-0.22113	-0.05432	-0.60361	0.07484	-0.07484	-0.34421	-0.06591	-0.00826	-0.46274	-0.17073	0.09047	0.05886	-0.05886	-1.43614	-0.41751	-0.15556	-0.27222	-0.51807	-0.85385
I_935121	I_935121	Retired, was Interferon gamma-inducible protein 16, a transcriptional repressor, can modulate the cell cycle, plays a role in myeloid cell differentiation, may be involved in autoimmune disease pathogenesis	0.02475	-0.02475	-0.14096	-0.13661	-0.03455	-0.1638	0.79522	0.73859	0.27574	-0.27575	-0.06205	-0.11402	0.07326	-0.0534	0.29656	0.45591	-0.00289	0.00289	-0.11371	0.07087	-0.04469	0.29215	-0.25427	0.02041
I_936329	I_936329	Protein of unknown function	-0.01467	0.01467	0.31118	0.26094	-0.00824	0.25889	-0.39059	-0.44271	-0.17659	0.1766	0.49201	0.77274	0.34426	0.20273	0.24779	0.41941	0.22856	-0.22855	0.44754	-0.03723	-0.35383	-0.34927	-1.03571	-0.95647
I_939868	I_939868	Protein containing a BolA-like protein domain, which may be involved in controlling cell morphology, has strong similarity to uncharacterized mouse 1810056O20Rik	0.10555	-0.10555	0.28785	0.00365	0.06163	-0.10092	0.24069	-0.03029	-0.2124	0.2124	0.0984	0.25756	-0.07869	0.21452	-0.52813	-0.43427	0.03067	-0.03067	-0.03361	-0.02378	-0.08646	-0.03308	-0.31432	-0.35842
I_942756	I_942756	Protein of unknown function	0.04456	-0.04457	0.08766	0.00611	0.03338	0.04592	-0.36837	-0.73708	-0.04875	0.04875	-0.02014	0.04771	0.13703	0.24758	0.00985	-0.11957	-0.00258	0.00258	-0.07743	0.19927	0.36452	0.40016	-0.32424	-0.26144
I_944093	I_944093	Protein containing a protein kinase domain and nine leucine rich repeats, which mediate protein-protein interactions, has a region of low similarity to a region of suppressor of clear (soc-2) homolog (human SHOC2), which enhances Ras and ERK signaling	-0.06365	0.06364	0.45046	0.20189	0.18439	0.09475	0.50551	0.33259	-0.05834	0.05834	0.04587	0.34964	0.28994	0.24926	0.37657	0.66654	-0.26461	0.26461	-0.45925	0.11174	-0.36425	-0.0011	-0.0714	-1.82056
I_944462	I_944462	Protein with very strong similarity to human KIAA1363, which is a serine hydrolase whose activity is increased in cancer cells	0.2239	-0.2239	0.77545	0.78982	0.14782	0.38345	-0.09325	-0.0242	-0.09718	0.09718	0.19923	0.494	0.09579	0.2176	-0.14198	0.17373	-0.16798	0.16798	0.13894	0.0385	0.34833	-0.1497	0.11588	-0.41954
I_944792	I_944792	Protein of unknown function, has high similarity to uncharacterized human KIAA0121	-0.17636	0.17636	0.1596	-0.02082	-0.09209	0.27911	0.32774	0.16335	0.11967	-0.11968	0.437	0.37845	0.4627	0.14821	0.57511	0.95287	0.07976	-0.07976	0.16232	0.04118	0.14374	0.25969	0.46213	0.48241
I_946379	I_946379	Protein containing four leucine rich repeats, leucine rich repeat C-terminal cysteine rich domain, immunoglobulin (Ig) domain, has a region of low similarity to a region of human SLIT1, which is a secreted brain protein that may guide neuronal migration	0.00321	-0.00322	0.51316	0.38771	0.15922	-0.05917	-0.05799	-0.3869	-0.21874	0.21874	-0.06105	0.14205	-0.07468	0.23818	-0.74759	-0.55083	-0.19686	0.19686	0.66256	0.38161	0.85914	0.46056	0.03355	-0.15161
I_950244	I_950244	Member of the ChaC-like protein family, has high similarity to uncharacterized human MGC4504	-0.03411	0.03411	0.23313	0.05797	-0.18827	-0.11545	0.06476	-0.77174	0.20141	-0.20142	0.10184	0.07805	-0.31108	-0.38041	-1.24282	-1.10953	-0.07332	0.07333	-0.20468	0.10085	-0.38699	-0.06995	-0.90415	-0.4402
I_954747	I_954747	Retired, was Protein of unknown function, has high similarity to uncharacterized mouse 0610027O18Rik	-0.06233	0.06233	-0.14875	-0.21198	-0.11058	-0.10065	0.36231	0.31428	0.05883	-0.05883	-0.08578	-0.24706	-0.03854	-0.08075	0.37133	0.13937	-0.09309	0.09308	-0.30872	-0.07492	0.15031	0.13897	0.36409	0.48531
I_957208	I_957208	Protein with high similarity to S. cerevisiae Rpf2p, which is a protein required for large ribosomal subunit assembly and maturation of precursor rRNAs, contains a Brix domain	-0.0582	0.0582	0.23776	0.27337	-0.09455	0.02806	0.04047	0.02435	0.20538	-0.20538	0.08755	-0.0292	-0.16948	-0.26942	-0.46163	-0.37564	-0.0431	0.04311	-0.04502	0.02892	-0.12981	-0.06495	-0.49634	-0.43835
I_957361	I_957361	Protein containing a protein kinase and a PDZ, DHR, or GLGF domain, which are found in signaling proteins, has a region of high similarity to mouse Mtssk, which interacts with microtubules and facilitates their organization in spermatids	-0.05333	0.05333	-0.50335	-0.563	-0.10388	-0.28024	-0.42999	-0.54913	0.04988	-0.04989	-0.40959	-0.34556	0.13896	-0.27036	0.31721	0.3781	-0.15184	0.15184	0.00055	0.02399	0.08624	0.22169	0.74967	0.91971
I_957402	I_957402	Protein of unknown function	-0.02154	0.02154	0.27665	0.10212	0.3421	0.27157	0.2914	-0.10801	-0.09796	0.09796	0.20777	0.26793	0.22699	0.16496	-0.53344	-0.01261	0.05565	-0.05565	0.11574	0.03998	-0.28771	-0.15666	-0.67478	-0.73237
I_957444	I_957444	Member of the rhodopsin family of G protein-coupled receptors (GPCR), has moderate similarity to trace amine receptor 1 (rat Tar1), which is a G protein-coupled trace-amine receptor that functions in cAMP biosynthesis	-0.07629	0.07629	-0.16913	0.29016	0.33233	-0.16913	0.7083	-0.16913	-0.00873	0.00873	-0.13725	0.02239	-0.07101	0.57373	-0.13725	-0.3799	0	0	0	0	0	0	-0.96297	-0.75808
I_957576	I_957576	Protein of unknown function, has very strong similarity to uncharacterized human KIBRA	-0.07159	0.07159	0.13937	0.14412	0.1274	0.09093	-0.13032	-0.32413	0.1264	-0.12639	-0.21278	-0.22089	-0.22463	-0.30377	-0.24735	0.0897	-0.01744	0.01744	-0.68012	-0.17494	0.23709	0.15929	-0.57703	-0.95396
I_957814	I_957814	Protein of unknown function	0.0602	-0.06021	0.38441	0.22912	-0.01267	-0.05912	0.01728	6e-05	-0.02561	0.02561	-0.02423	-0.11327	0.07572	0.07053	0.25274	0.24383	-0.25627	0.25627	-0.01685	0.01829	0.07983	0.0518	0.91616	0.78788
I_957877	I_957877	Member of the glycosyl hydrolase family 38 of alpha-mannosidases, which are involved in carbohydrate metabolism, has low similarity to mannosidase alpha class 2B member 1 (human MAN2B1), which is associated with alpha-mannosidosis	-0.00141	0.00141	0.25484	-0.01864	-0.00413	0.16391	0.51352	0.51217	0.18277	-0.18278	0.02936	0.09139	0.08187	-0.01562	0.45902	0.52594	-0.10678	0.10678	-0.242	-0.33529	-0.3782	-0.10677	0.09952	0.14597
I_958032	I_958032	Member of the sulfatase family, has weak similarity to iduronate 2-sulfatase (human IDS), which catalyzes the hydrolysis of 2-sulfate groups of L-iduronate 2-sulfate residues of dermatan sulfate and heparan sulfate in glycosaminoglycan catabolism	-0.20491	0.20492	0.47175	0.05706	0.25052	0.40614	0.59914	0.38596	0.12528	-0.12528	0.15599	-0.23179	-0.13659	-0.30975	-0.30632	0.44048	0.01795	-0.01795	0.55294	0.20435	0.06902	0.24725	0.75839	1.09181
I_958468	I_958468	Member of the prothymosin and parathymosin family, which may be involved in cell cycle progression, proliferation, and cell differentiation, has strong similarity to uncharacterized human LOC51685	-0.01076	0.01076	0.34367	0.18076	0.25124	-0.01517	-0.20842	-0.29159	0.03905	-0.03906	-0.17814	-0.11094	-0.13555	0.17799	-0.69356	-0.67867	-0.19709	0.19709	0.05821	0.01754	0.09542	-0.03014	-0.78355	-0.83802
I_958577	I_958577	Protein of unknown function	0.00881	-0.00881	0.85061	0.67489	0.20499	-0.01039	0.7546	0.26747	-0.19099	0.19099	0.42795	0.16133	-0.09735	0.21452	-0.28781	0.03746	0.1556	-0.15559	0.63817	0.7582	0.15794	0.46666	-0.13806	-0.11238
I_958593	I_958593	Retired, was Protein containing a pleckstrin homology (PH) domain, which mediate protein-protein and protein-lipid interactions	0.18099	-0.18099	0.50215	0.20345	0.20561	0.03762	0.6799	0.19361	-0.16348	0.16347	0.25852	0.29501	0.0606	0.32144	0.7175	0.47231	0.00251	-0.00251	0.10791	0.40064	-0.00955	0.07618	0.30299	0.86551
I_959267	I_959267	Retired, replaced by A_23_P377819, was Splicing factor arginine serine rich 5, a member of the serine/arginine (SR) protein family of regulators of alternative pre-mRNA splicing which plays a role in alternative splice site selection	0.07776	-0.07776	0.94207	0.76766	-0.10231	-0.12729	0.39449	0.41652	0.04664	-0.04664	0.36054	0.42085	-0.09896	0.00012	0.22012	0.22853	0.04386	-0.04386	0.44124	0.51927	0.1881	0.30464	0.18949	0.34105
I_959502	I_959502	Retired, replaced by A_23_P428287, was Gap junction protein alpha 7 (connexin 45), involved in cell-cell signaling and intercellular transport, regulates conduction of cardiac signals	0.10237	-0.10237	0.91365	0.45741	0.23638	0.076	0.25497	-0.0091	-0.01061	0.01061	0.16258	0.09903	-0.00014	-0.06468	0.00721	0.34673	-0.11706	0.11706	0.43435	0.40856	-0.17238	0.30967	-0.00746	0.15491
I_959523	I_959523	Member of the trypsin family of serine proteases, has moderate similarity to mast cell protease 6 (rat Mcpt6), which is a mast cell serine protease that is expressed during inflammatory responses to nematode infection	0.13913	-0.13912	-0.57401	-0.5344	0.18565	-0.07416	0.15307	-0.35236	-0.17462	0.17462	0.47116	0.24031	0.05845	0.40834	-0.3109	0.10888	0.03676	-0.03676	-0.45835	-0.52769	-0.18284	0.01747	-0.18205	-0.12367
I_959644	I_959644	Protein with high similarity to 1q and tumor necrosis factor related protein 1 (human C1QTNF1), which interacts with the V2 vasopressin receptor, contains a C-terminal C1q domain	0.05637	-0.05637	0.00019	0.09103	-0.05203	-0.18801	-0.71953	-0.3411	-0.17782	0.17781	-0.0292	0.0418	0.22406	-0.00199	0.36195	0.18534	-0.08583	0.08583	-0.15202	-0.22274	-0.24679	-0.15413	1.03366	0.59558
I_959795	I_959795	Protein of unknown function, has very strong similarity to uncharacterized human KIAA0599	-0.13312	0.13311	-0.20202	0.04865	-0.06547	-0.00611	-0.1285	-0.19778	0.00624	-0.00624	0.06888	-0.09377	-0.27205	-0.07396	-0.28067	-0.29139	0.17333	-0.17333	0.21121	0.00772	-0.07125	-0.08458	-0.66728	-0.62313
I_960055	I_960055	Retired, was RAR related orphan receptor A, member of the nuclear hormone receptor superfamily, may have a role in negative control of cell proliferation; gene mutation is associated with recessive Robinow syndrome	0.00834	-0.00834	0.70666	0.49698	-0.05616	-0.05495	0.57427	0.58567	0.01765	-0.01765	0.07348	-0.04994	0.01306	-0.01652	0.21764	0.33371	0.07082	-0.07083	-0.30914	0.04788	-0.20668	-0.15124	-0.76698	-0.75172
I_960077	I_960077	Member of the tropomyosin family, which are contractile proteins	-0.04285	0.04285	0.32781	0.28022	0.03678	0.02299	0.05589	0.15444	0.11914	-0.11913	0.28919	0.26092	0.18852	0.04787	-0.38634	-0.53609	0.02193	-0.02193	-0.20165	0.02458	-0.25983	-0.04714	0.17752	0.21662
I_960105	I_960105	Retired, replaced by A_23_P320250, was Protein containing a myosin head domain (motor domain), has moderate similarity to a region of myosin I (C. elegans HUM-2), which is a class V unconventional myosin heavy chain	-0.17413	0.17413	0.05487	0.14642	-0.05469	0.06682	-0.13113	-0.15304	0.20263	-0.20263	0.20057	-0.01815	0.08821	-0.07705	-0.66737	-0.74475	-0.06751	0.06751	-0.04642	0.15236	0.02154	0.00323	-0.56381	-0.5522
I_962424	I_962424	Retired, replaced by A_23_P374777, was SH3-domain kinase binding protein 1, an SH3 adaptor protein that interacts with the proto-oncoprotein c-Cbl (CBL) and B cell linker protein (BLNK), component of a CBL - endophilin complex that mediates ...	-0.00372	0.00372	0.45087	0.09578	-0.23041	0.02549	0.22626	0.19283	0.08469	-0.08469	0.02277	-0.12041	0.04548	0.21275	0.04754	-0.20499	-0.12633	0.12632	0.01256	0.03223	-0.06792	-0.06225	0.68052	0.92561
I_962966	I_962966	Retired, was Protein with high similarity to human MAP3K5, which is MAP kinase kinase kinase that activates SAPK, JNK and p38 signaling pathways and also induces apoptosis when overexpressed	0.31388	-0.31388	-0.9759	-0.62739	-0.87926	-0.52435	-0.98151	-0.47733	0.06693	-0.06693	-1.13324	-1.5097	-1.30904	-0.539	-0.86157	-1.25148	0.07136	-0.07137	-0.41807	-0.04445	-0.263	0.0913	-1.38031	-2.41517
I_963261	I_963261	Retired, was Protein of unknown function, has strong similarity to uncharacterized human BANP	0.25063	-0.25063	-0.55081	-0.41087	0.09459	0.19856	-0.33617	-0.00295	-0.12296	0.12297	-0.33514	-0.23654	0.00084	0.28268	-0.00315	0.15365	0.17528	-0.17528	-0.1243	-0.39905	0.24471	-0.0969	0.04607	0.15404
I_963581	I_963581	Retired, replaced by A_23_P390518, was Tumor necrosis factor receptor superfamily member 11a (receptor activator of NF-kappaB), binds to ligand RANKL (TNFSF11) and activates NF-kappaB and JNK, involved in bone development and T-cell growth; gene ...	-0.06394	0.06395	0.14136	-0.12773	-0.04548	0.41342	0.26731	0.71552	-0.299	0.299	0.08764	0.04403	0.49405	0.37335	0.38582	-0.07181	-0.0377	0.0377	0.30451	-0.06829	0.19695	0.02819	0.81149	0.53565
I_963615	I_963615	Member of the trypsin family of serine proteases, has moderate similarity to trypsinogen-2 (human PRSS2), which activates type IV collagenase (human MMP9) and PAR2 (human F2RL1) and may play a role in tumor cell invasion and metastasis	-0.0748	0.0748	0.16846	-0.00381	0.18828	-0.21937	0.46378	0.11966	0.00791	-0.0079	0.53978	0.91347	0.40936	0.63233	1.03089	0.69107	-0.24061	0.24061	0.86076	0.76725	0.5748	0.51942	0.78129	0.98227
I_963685	I_963685	Retired, was Homeodomain interacting protein kinase 2, serine/threonine protein kinase, binds to and represses the transcriptional activity of homeodomain proteins, binds to and phosphorylates TP53, has predicted roles in cell proliferation and apoptosis	-0.0368	0.0368	0.89362	0.43439	-0.11367	-0.15692	-0.03604	-0.08605	0.06782	-0.06781	0.5325	0.28537	0.01263	0.09256	0.24304	-0.06289	-0.11276	0.11275	-0.08985	-0.03201	-0.64302	-0.17694	-0.09961	0.23868
I_963838	I_963838	Retired, was Member of the metallothionein family, which are cysteine-rich heavy metal binding proteins	-0.24193	0.24194	-0.12237	0.35037	-0.0034	0.12373	-1.03933	-0.97894	0.17497	-0.17497	-0.31869	-0.40297	-0.18274	0.0256	-0.7712	-0.62773	0	0	0	0	0	0	0	0
I_964222	I_964222	Retired, was Complement component 1 (r subcomponent), a serine protease that activates C1, the first component of the classical complement pathway, through cleavage of C1S; mutation of the corresponding gene is associated with lupus erythematosus-like ...	0.14567	-0.14566	0.392	0.0121	-0.04949	-0.29429	0.73262	0.72602	-0.13534	0.13534	0.01271	-0.0282	0.06816	0.09591	0.56304	0.26994	-0.22672	0.22672	-0.57947	-0.48146	-0.5344	-0.37806	0.02264	0.2731
I_964633	I_964633	Protein with strong similarity to serine-threonine kinase (rat Pim3), contains a protein kinase domain	-0.06027	0.06027	0.17665	0.24555	-0.0626	0.03708	-0.00442	-0.11995	0.1287	-0.1287	-0.32332	-0.33986	-0.07316	-0.07324	-0.01438	-0.00119	0.0094	-0.00941	0.19643	0.17266	-0.07759	0.04522	-0.58759	-0.58049
I_964795	I_964795	Protein with strong similarity to radical fringe gene homolog (rat Rfng), which inhibits the Notch signal transduction pathway in postmitotic neurons of the brain, member of the Fringe-like family	-0.06953	0.06953	-0.05824	-0.04126	-0.42542	0.20866	-0.57456	0.22424	0.19414	-0.19414	0.32691	0.12734	0.25411	0.21084	0.66597	0.31139	-0.11671	0.11671	0.28862	-0.00479	0.31495	0.1784	0.80725	0.40067
I_964889	I_964889	Retired, was Protein with strong similarity to mouse Net1, which is a Rho guanine nucleotide exchange factor, contains a RhoGEF (GTPase exchange factor) and a pleckstrin homology (PH) domain, which mediate protein-protein and protein-lipid interactions	-0.14698	0.14698	0.41925	0.56172	-0.08726	0.08211	-0.26354	-0.34824	0.34915	-0.34915	0.45166	0.33998	-0.11531	-0.21511	-0.40405	-0.49366	-0.09095	0.09094	0.06639	0.11644	-0.21108	0.03662	0.3324	0.33108
I_965003	I_965003	Retired, was Protein containing eight epidermal growth factor (EGF)-like domains and two TGF binding protein domains, has strong similarity to a region of latent transforming growth factor binding protein 3 (mouse Ltbp3)	-0.04675	0.04675	-0.19887	0.02318	-0.22421	0.07418	-0.3886	0.2071	0.06734	-0.06734	0.21937	0.46908	0.36541	0.14504	0.69423	0.50231	-0.13945	0.13946	0.00329	-0.24637	0.44052	-0.20657	0.84996	0.55549
I_965379	I_965379	Protein with high similarity to type 1 keratin (mouse Krt1-10), which is an intermediate filament component involved in cell differentiation, member of the intermediate filament family, which are components of the cytoskeleton and nuclear envelope	-0.09041	0.09041	-0.0042	0.01823	-0.0231	0.01761	0.01393	-0.18227	0.012	-0.01199	-0.22376	-0.23774	-0.2912	-0.05601	-0.2786	-0.50023	0.06429	-0.06429	-0.02517	-0.03383	-0.17665	-0.02866	-0.52736	-0.56139
I_965527	I_965527	Protein of unknown function, has a region of very strong similarity to human DDIT3, which is associated with myxoid liposarcomas upon gene mutation	-0.10144	0.10145	-0.46112	-0.25508	0.17419	0.144953	0.49064	0.18398	-0.27325	0.27325	-0.23483	-0.4304	0.1047	0.15597	0.48805	0.37641	0.07799	-0.07799	0.40435	0.23728	0.41349	0.27801	0.73485	0.97482
I_966202	I_966202	Retired, was Protein with high similarity to lamin B1 (human LMNB1), which may be a structural member of the nuclear lamina cleaved by proteases during apoptosis, member of the intermediate filament family, contains an intermediate filament tail domain	-0.01142	0.01142	0.00045	0.19084	0.04969	-0.01964	-0.58152	-0.53788	0.15953	-0.15954	-0.077	-0.2889	-0.16385	-0.12565	-0.36797	-0.33384	-0.05053	0.05054	0.14579	0.12835	-0.10184	0.10294	-1.06295	-1.08033
I_966417	I_966417	Retired, was Member of the phosphatidic acid phosphatase-related (PAP2) phosphoesterase family, has a region of weak similarity to phosphatidic acid phosphatase 2c (human PPAP2C), which hydrolyzes phospholipids and may be involved in signal transduction	-0.05012	0.05012	0.44371	0.02847	-0.12073	0.05052	-0.90861	-0.83788	-0.14905	0.14905	-0.32909	-0.02359	0.01442	-0.07848	0.01648	-0.07369	-0.04326	0.04326	-0.04075	-0.20895	0.0215	-0.14338	-0.18526	-0.28617
I_935684	ICMT	Isoprenylcysteine carboxyl methyltransferase, a putative metalloenzyme that catalyzes the prenylcysteine carboxyl methylation of C-terminal CAAX motifs in G proteins, which targets them to the plasma membrane	0.07625	-0.07625	0.20354	0.07391	0.04758	-0.07967	0.10127	-0.18761	-0.03938	0.03938	-0.0429	-0.0064	-0.12455	0.07837	-0.62664	-0.54422	-0.02152	0.02152	0.12247	0.11848	-0.14849	0.00199	-0.52113	-0.41302
I_960970	ID1	Inhibitor of DNA binding 1, transcriptional corepressor of helix-loop-helix transcription factors that acts in the regulation of cell proliferation and differentiation; dysregulated expression of corresponding gene is associated with several neoplasms	-0.0662	0.0662	0.81928	0.83794	-0.16734	-0.16562	-0.83989	-0.93191	0.19305	-0.19306	0.63087	0.45063	-0.18385	-0.18473	-2.45131	-2.4785	0.02391	-0.02391	-0.13391	-0.03072	-0.39603	-0.07349	-0.3469	-0.19121
I_943701	ID2	Member of the Id helix-loop-helix family of proteins that may negatively regulate cell differentiation by inhibiting helix-loop-helix transcription factors via a dominant-negative mechanism	-0.11214	0.11213	0.38477	0.61706	0.03175	-0.08889	-0.07274	0.16219	-0.01759	0.01758	0.61691	0.73023	-0.06118	-0.12264	-1.48196	-1.22098	0.17941	-0.17941	-0.16622	-0.25507	-0.17703	-0.34908	-0.14423	-0.44348
I_928637	ID3	Inhibitor of DNA binding 3, basic helix-loop-helix family member that negatively regulates cell differentiation by inhibiting DNA binding of certain bHLH transcription factors; decreased expression may correlate with neuroblastoma	-0.13783	0.13783	0.24865	0.41455	-0.13034	0.01859	-0.30635	0.04609	-0.10448	0.10448	0.67874	0.73535	0.08162	0.3098	-1.22985	-1.35969	0.38126	-0.38127	-0.14986	-0.44613	-0.08893	-0.39656	-0.24459	-0.18488
I_957092	ID4	Inhibitor of DNA-binding 4, has a HLH-dimerization domain but lacks a DNA-binding domain, inhibits transcription activation by HLH factors by forming heterodimers, may be involved in pathogenesis of breast, ovarian cancer by inhibiting BRCA1 expression	0.51848	-0.51848	0.88327	1.02826	0.02543	0.79138	-0.18417	0.17874	0.09945	-0.09945	0.72035	0.87422	0.10608	-0.07022	-1.6655	-0.26095	-0.02471	0.02471	0.86676	0.72496	-0.19064	0.00831	-0.55454	-2.08128
I_964390	IDH2	Isocitrate dehydrogenase 2 (NADP+) mitochondrial, catalyzes the oxidative decarboxylation of isocitrate to form alpha-ketoglutarate; gene variant of mouse Idh2 is detected in the epileptic strain E1	0.05113	-0.05114	0.04427	0.01548	0.1721	-0.01143	-0.03392	-0.05122	0.07571	-0.07571	-0.08026	-0.00694	-0.06827	0.06308	-0.50771	-0.52126	-0.09397	0.09397	0.00856	-0.00614	-0.02609	0.08687	-0.27493	-0.26904
I_1110256	IER3	Immediate early response 3, a radiation-inducible protein that may regulate cell growth, apoptosis, and T-cell homeostasis, may also play roles in inflammation and keratinocyte growth and differentiation	0.06895	-0.06895	0.35829	0.19536	0.05038	-0.02945	0.05846	-0.03461	0.04625	-0.04625	-0.37313	-0.04596	-0.12867	-0.21302	-0.03264	0.08706	-0.06288	0.06288	0.2463	0.29709	-0.15253	-0.07691	-0.47584	-0.52424
I_931457	IFIT1	Interferon-induced protein with tetratricopeptide repeats 1, interacts with the large eIF-3 complex through P48 to inhibit protein synthesis, induced by IFN, double-stranded RNA, and viruses, upregulated in chronic hepatitis C infection	-0.07254	0.07254	-0.18801	-0.15243	0.0425	0.01671	0.86261	0.79248	0.22623	-0.22624	0.10368	-0.04543	0.11186	-0.06805	0.35888	0.46214	-0.09225	0.09225	-0.61287	-0.39281	-0.4229	-0.21544	0.47055	0.45194
I_931455	IFIT2	Protein with high similarity to interferon-induced protein with tetratricopeptide repeats 4 (human IFIT4), contains four TPR (tetratrico peptide repeat) domains, which may mediate protein-protein interactions	-0.21485	0.21485	-0.21225	0.23908	-0.16285	0.20993	0.70529	0.60524	0.36258	-0.36259	0.11559	-0.51774	0.4691	0.37042	0.75676	-0.46439	-0.35799	0.35799	-0.38649	-0.35185	-0.31197	-0.02841	0.37739	0.86778
I_965186	IFITM1	Interferon-induced transmembrane protein 1, a putative receptor signaling protein that plays a role in the transduction of antiproliferative and homotypic adhesion signals, regulates L-selectin (SELL) expression	-0.01407	0.01407	-0.6817	-0.45436	-0.12953	-0.28402	0.68855	0.70806	0.00041	-0.00041	-0.17382	-0.16878	-0.01569	0.21238	0.52808	0.44406	-0.03577	0.03577	-0.38404	-0.5111	-0.16066	-0.2421	-0.49836	-0.63017
I_950087	IFRD2	Protein that has similarity to murine interferon-related developmental regulator 2 (Ifrd2) and rat Rn.3723 (PC4)	0.02767	-0.02767	0.11097	0.04604	-0.06296	-0.09581	-0.16768	-0.51788	0.09584	-0.09583	-0.05094	-0.10706	-0.17878	-0.1106	-0.42744	-0.40229	-0.06827	0.06827	0.07645	0.21639	-0.05928	0.16435	-0.66167	-0.50399
I_966148	IGBP1	Immunoglobulin binding protein 1, may be involved in IgG receptor-mediated B cell signal transduction	-0.02307	0.02306	-0.01326	-0.10662	0.00305	0.01046	0.39223	0.31936	0.20478	-0.20478	-0.11456	-0.04864	-0.00606	-0.08162	0.35565	0.55061	-0.03309	0.03309	-0.12906	-0.07189	0.02807	0.15304	0.01312	0.10173
I_961326	IGFBP4	Insulin-like growth factor binding protein 4, binds to and inhbits signaling through IGF1 and IGF2, plays a role in cell growth and proliferation, ovarian steroidogenesis, and embryo implantation	0.12451	-0.12451	-0.04181	-0.14525	0.08732	-0.13331	0.07939	0.25141	0.17274	-0.17274	-0.06692	-0.02984	0.12196	0.109	0.74343	0.44313	-0.14295	0.14294	-0.11865	-0.07388	-0.03798	0.24733	0.30303	0.70985
I_931905	IL10RA	Interleukin 10 receptor alpha subunit, activates STAT1 and STAT3, mediates IL10 -induced inhibition of T cell and macrophage proliferation, acts in the anti-inflammatory response and viral evasion; implicated in psoriasis and a form of childhood leukemia	-0.07139	0.07139	-0.82425	-0.45382	-0.34771	-0.11941	-0.35796	-0.47989	-0.02294	0.02294	-0.23333	-0.40365	-0.3214	-0.03761	-0.39029	-0.3104	0.28116	-0.28116	-0.17741	-0.11492	0.03281	-0.14368	-0.93795	-1.12051
I_961202	IL11	Interleukin 11, a stromal cell-derived cytokine with pleiotropic actions on hematopoietic, hepatic, and other cell types, modulates immune and inflammatory responses, stimulates platelet production, and may participate in uterine responses to ...	0.17155	-0.17155	1.15672	1.17503	-0.18326	-0.02084	-0.16712	-0.05513	-0.2312	0.23119	0.31534	0.31122	-0.19887	0.5906	-0.3454	-0.05023	0.05728	-0.05728	0.62084	0.38027	-0.44155	-0.44172	0.16396	-0.97335
I_929482	IL6	Interleukin 6 (interferon-beta 2), cytokine that promotes the proliferation of T and B cells and final maturation of B-cells; implicated in multiple sclerosis and the persistence of multiple myeloma and B-chronic lympohcytic leukemia	0.04166	-0.04166	0.82658	1.46552	0.06268	-0.10628	0.61956	0.41341	-0.27524	0.27524	0.13058	0.33567	0.14439	0.35654	0.8743	0.39745	0.0234	-0.0234	0.37878	-0.18715	0.40227	-0.20791	1.01543	1.56705
I_1002098	INCENP	Inner centromere protein antigens (135kD and 155kD), a passenger protein that targets Survivin (BIRC5) and AIRK2, associates with HP1 protein, plays a role in cytokinesis, chromosome segregation, and cleavage furrow formation at metaphase and anaphase	0.03821	-0.03821	0.39398	0.16404	0.02711	-0.05008	-0.16011	-0.38023	-0.04016	0.04016	0.01413	-0.1735	-0.03529	-0.01316	-0.20792	-0.02371	-0.28115	0.28115	0.54667	0.41565	0.08301	0.40622	-0.44828	-0.69816
I_957651	INPP4B	Inositol polyphosphate 4-phosphatase II, hydrolyzes the 4-position phosphate of phosphatidylinositol 3,4-bisphosphate, inositol 1,3,4-trisphosphate, and inositol 3,4-bisphosphate, plays a role in phosphatidylinositol 3,4-bisphosphate-mediated signaling	-0.07871	0.07871	0.06197	0.11799	0.13572	0.10709	0.28446	0.08866	0.00429	-0.00429	-0.11962	-0.23024	-0.14978	-0.08752	0.67495	0.77017	0.03081	-0.0308	0.13945	0.15317	0.05873	0.06152	0.40141	0.41913
I_1109808	IR1899308	Protein with high similarity to mesoderm posterior 1 (mouse Mesp1), which is a transcription factor required for the development of the nascent mesoderm, heart precursor cells and primordial germ cells, contains a helix-loop-helix DNA-binding domain	0.20015	-0.20015	-0.62401	-0.45079	-0.49156	0.06384	-0.769	-0.36537	-0.05843	0.05843	-0.6746	-0.63173	0.05537	-0.43219	-0.24647	-0.04557	0.27281	-0.27281	-0.29967	-0.43418	-0.19673	-0.16226	-1.04437	-1.00383
I_958614	ITGA11	Integrin subunit alpha 11, member of the integrin famly of adhesion receptors, heterodimerizes with beta 1 integrin (ITGB1) to act as a receptor for collagen I, induced during myogenic differentiation	0.04705	-0.04705	0.00469	-0.05343	-0.05883	-0.30705	0.52977	0.36459	0.06771	-0.06771	-0.19096	-0.26473	0.02965	-0.00778	0.48824	0.34251	-0.06146	0.06146	-0.5162	-0.18888	-0.22359	0.00537	-0.60838	-0.32963
I_960687	ITGBL1	Integrin beta-like 1, contains ten beta integrin epidermal growth factor (EGF) like repeat domains similar to those found in the cysteine rich stalk like structure of integrin beta subunits	0.34714	-0.34714	0.89595	0.62739	0.7386	0.72456	0.41093	0.36275	-0.25124	0.25124	0.53519	0.52647	0.4696	0.94291	0.62655	0.42933	0.27065	-0.27065	-0.23465	0.35106	-0.22304	0.22314	0.34225	0.10693
I_960295	ITM2B	Integral membrane protein 2B, a type II integral membrane protein; gene mutation is associated with familial British and Danish dementias, which are characterized by amyloid plaque deposits, neurofibrillary tangles, and neuronal loss	-0.13869	0.13869	-0.38984	-0.02856	-0.03438	0.10728	0.33533	0.34098	0.16059	-0.16059	-0.11207	-0.37525	-0.01279	-0.22577	0.18961	-0.04525	-0.04474	0.04475	-0.51031	-0.2691	-0.05331	-0.14131	0.133	0.13653
I_943987	ITPR1	Inositol 1,4,5-triphosphate receptor 1, intracellular calcium channel that couples cell membrane receptors to calcium signal transduction pathways	-0.30813	0.30812	-0.96287	-0.58889	-0.64634	-1.28884	-0.46707	-0.86562	-0.00474	0.00474	-0.84245	-0.4476	-0.74272	-0.62693	-0.60771	-0.37073	-0.20036	0.20036	0.84336	0.81834	1.10499	0.26825	0.50419	0.25884
I_1100087	JJAZ1	Joined to JAZF1, a putative nuclear protein with a zinc finger motif; corresponding gene is frequently translocated in endometrial stromal tumors	0.05113	-0.05112	0.21465	0.0582	0.01585	-0.12117	-0.04138	-0.18568	0.12137	-0.12137	-0.06429	0.05303	-0.12805	-0.02828	-0.39101	-0.23254	-0.09326	0.09326	0.10782	0.15189	-0.025	0.05688	-0.49521	-0.40053
I_928509	JWA	Protein with strong similarity to glutamate transporter EAAC1-interacting protein (rat Gtrap3-18), which binds to the excitatory glutamate carrier EAAC1 (rat Slc1a1) thus reducing the affinity of EEAC1 for its substrate and reducing glutamate transport	-0.03718	0.03718	0.14528	-0.07397	-0.00105	0.06262	0.61605	0.40594	-0.048	0.048	0.09571	0.2167	-0.04234	0.02593	0.24122	0.65586	0.05283	-0.05283	-0.28297	-0.41821	-0.09282	-0.14232	0.11778	-0.00041
I_956906	KBRAS1	I-kappa-B-interacting Ras-like protein 1, member of GTPase family that interacts with PEST domains and decreases degradation rate of IkappaB alpha (CHUK) and beta (IKBKB), inhibiting NF-kappaB activation	-0.06406	0.06406	0.54869	0.33269	0.04146	0.24869	0.8183	0.87886	-0.1055	0.1055	0.51867	0.61922	0.16392	0.23481	0.31193	0.39655	0.39263	-0.39262	-0.41726	-0.25858	-0.19544	-0.47259	0.00426	0.26096
I_929376	KCNH2	Potassium voltage-gated channel (subfamily H_eag-related_member 2), forms the IKr channels that are important for cardiac rhythm and may play a role in insulin secretion; mutations in the gene are associated with the long QT form of cardiac arrhythmia	0.04992	-0.04993	-0.69694	-0.72976	0.34995	0.00229	-0.20145	-1.09124	-0.12918	0.12918	-0.10411	0.15678	-0.4211	-0.33073	-0.68993	0.29861	0.13893	-0.13894	1.05031	0.53393	-0.42548	0.38898	-2.5017	-2.74988
I_960328	KCNRG	Protein containing a K+ channel tetramerization domain, which facilitates assembly of alpha-subunits into functional tetrameric channels	-0.07813	0.07813	-0.21005	-0.35857	-0.21567	-0.11752	0.55121	0.42118	0.11357	-0.11357	-0.04146	-0.01848	0.2245	-0.19528	0.35363	0.04811	-0.06077	0.06077	-0.36235	-0.20752	-0.35388	-0.15959	0.05877	0.54176
I_960245	KIAA0101	Protein of unknown function	-0.15656	0.15656	0.02906	0.13612	-0.08621	0.05192	-0.51057	-0.49752	0.18514	-0.18515	-0.26269	-0.20489	-0.19809	-0.09953	-1.05807	-1.1414	0.05116	-0.05116	-0.17546	-0.23523	-0.07257	-0.06865	-1.06118	-1.17703
I_961369	KIAA0111	Protein with high similarity to eukaryotic initiation factor 4a (S. pombe Tif1p), which is a putative RNA helicase, member of the DEAD or DEAH box ATP-dependent RNA helicase family, contains a helicase conserved C-terminal domain	-0.11043	0.11043	-0.10908	0.04784	-0.06895	0.04145	-0.15947	-0.12815	0.17589	-0.17588	-0.18155	-0.20592	-0.08534	-0.11582	-0.33376	-0.479	-0.00091	0.00091	0.07588	0.04633	-0.0296	0.10925	-0.46321	-0.54195
I_936494	KIAA0582	Protein of unknown function, has weak similarity to a region of A kinase anchor protein 6 (human AKAP6), which binds the type II ryanodine receptor (RYR2), PP2A (PPP2R1B), and the regulatory subunit of type II cAMP-dependent protein kinase (PRKAR2A)	-0.01628	0.01628	-0.07987	-0.0795	0.02869	-0.13805	0.64233	0.40347	0.20643	-0.20643	-0.20739	-0.24735	0.06548	-0.12535	0.38127	0.58945	-0.03403	0.03403	0.02487	0.23658	0.12765	0.40688	0.13477	0.38397
I_962837	KIAA0675	Protein containing a C3HC4 type (RING) zinc finger, which may mediate protein-protein interactions	-0.11203	0.11203	0.03789	-0.08382	0.07727	0.11992	0.49666	0.17222	0.19232	-0.19231	-0.14189	-0.0422	0.01461	-0.14852	0.44767	0.65238	-0.06546	0.06547	-0.22917	-0.04067	-0.14706	0.06503	0.13457	0.02576
I_1100404	KIAA0790	Protein containing two SAM (sterile alpha motif) domains, which may mediate protein-protein interactions	0.02233	-0.02232	-0.08889	0.012	0.07466	-0.01187	0.3493	0.37635	0.29193	-0.29193	-0.12399	-0.18434	0.02743	-0.12627	0.26045	0.46015	-0.07909	0.07908	-0.13368	0.00461	-0.19281	0.04102	0.05429	0.12543
I_945727	KIAA1169	Protein of unknown function	-0.18993	0.18994	-0.4115	-0.21457	-0.20042	-0.00761	0.32223	0.27168	0.28178	-0.28178	-0.11661	-0.19727	-0.03885	-0.20112	0.43416	0.4037	0.00754	-0.00754	-0.27024	-0.2188	-0.10342	0.02911	0.44766	0.39671
I_960303	KIAA1361	Protein with very strong similarity to thousand and one amino acid protein kinase (rat LOC286993), which binds rat Mek3 and is involved in regulating the p38-containing stress responsive MAP kinase pathway, contains a protein kinase domain	0.06088	-0.06088	0.72359	0.70086	0.3278	0.19852	0.32588	0.23749	-0.17002	0.17002	0.3714	0.39703	0.32867	0.42874	0.39999	0.05564	-0.02375	0.02375	0.15292	0.18451	0.24389	0.04379	0.31207	0.67377
I_928847	KIAA1389	Protein with high similarity to human KIAA0440, which is a Rap GTPase-activating protein that may act as a tumor suppressor by inhibiting small G protein-mediated mitogenic signaling, contains a Rap or Ran-GAP domain and a PDZ, DHR, or GLGF domain	0.0699	-0.0699	-0.17054	-0.29798	0.13494	-0.11351	0.46228	0.24745	0.08559	-0.0856	-0.48871	-0.24628	-0.03336	-0.21709	0.42783	0.43271	0.11928	-0.11928	-0.74188	0.3744	0.32513	0.42862	-0.42942	-0.57239
I_928641	KIAA1710	Protein containing twelve C2H2 type zinc finger domains and a kruppel-associated box (KRAB) domain, has moderate similarity to zinc finger protein 85 (human ZNF85), which functions as a transcriptional corepressor	-0.03284	0.03285	-0.05216	-0.95419	-0.05659	0.0088	0.83713	0.49044	0.1053	-0.10529	-0.15574	-0.09243	-0.1193	0.08825	0.23264	0.22927	-0.12886	0.12885	-0.10454	0.18579	-0.19805	0.17203	0.22056	0.36323
I_1152136	KIAA1857	Protein containing two BNR repeats, three laminin epidermal growth factor (EGF)-like domains, and a laminin N-terminal domain, has a region of low similarity to a region of netrin-1 (human NTN1), which has a role in axon guidance and cell migration	0.12987	-0.12987	0.05531	-0.05374	-0.25212	0.12899	-0.0466	0.47173	0.19102	-0.19103	-0.07447	0.47526	0.13988	0.16221	0.73737	0.75111	0.02865	-0.02865	0.18016	-0.1775	0.25398	0.0281	0.62444	0.53092
I_943700	KIDINS220	Protein with strong similarity to kinase D-interacting substance of 220 kDa (rat Kidins220), which is a protein kinase D (rat Prkcm) substrate that acts downstream of TrkA (rat Ntrk1) and NGF (rat Ngfr) receptors, contains 11 ankyrin (Ank) repeats	-0.0825	0.0825	0.66798	0.37979	0.36514	0.30624	0.45197	0.45144	0.11274	-0.11274	0.27246	0.01564	-0.06561	0.01833	0.3361	0.27618	-0.11372	0.11372	0.42083	0.35867	0.30275	0.5825	0.88004	1.07584
I_931999	KIF11	Kinesin-like 1, a microtubule-associated kinesin motor that functions in mitotic spindle formation and centrosome separation, and acts antagonistically with the minus-end directed kinesin KNSL2, localization to spindle is regulated by CDC2 ...	0.01561	-0.01562	0.59181	0.17143	0.2714	0.02899	-0.2849	-0.81261	-0.01919	0.01919	0.16721	0.24849	0.23802	0.13012	-0.34411	0.14249	-0.00207	0.00207	0.43704	0.58173	-0.00057	0.31738	-1.27527	-1.0186
I_930318	KIF14	Protein containing two kinesin motor domains, which bind ATP and microtubules, and two forkhead associated (FHA) domains, which bind phosphopeptides, has a region of moderate similarity to a region of plus-end directed motor kinesin (C. elegans UNC-104)	0.09484	-0.09483	1.66768	1.27977	0.89083	0.12206	0.67361	-0.40251	-0.48856	0.48856	0.214	0.32064	0.29384	0.68775	0.34231	0.24717	0.23326	-0.23327	0.62221	0.88343	0.69433	0.43481	-1.80095	-0.29605
I_959791	KIF22	Kinesin-like 4, a DNA and microtubule-binding protein, associates with mitotic chromosomes and is enriched in the kinetochore during anaphase, involved in generating the away-from-the-pole force necessary for chromosome oscillation during mitosis	-0.00987	0.00988	0.09419	0.24005	0.20155	0.13914	-0.66899	-0.50942	0.17301	-0.17301	0.0485	0.08005	0.07917	-0.09181	-0.24679	-0.23275	-0.0309	0.0309	0.19258	0.22153	0.06056	0.18148	-0.8484	-0.85145
I_959551	KIF23	Kinesin-like 5, a microtubule-associated motor protein that cross-bridges antiparallel microtubules and induces their sliding similar to that seen in spindle elongation; interacts with the protein kinase PLK and the ADP-ribosylation factor ARF3	0.01447	-0.01447	0.43414	0.41497	0.20116	0.14683	-0.20925	-0.23841	0.06774	-0.06774	0.18826	0.02172	-0.00267	0.07213	-0.19142	-0.21202	-0.0022	0.00221	0.12921	0.33803	-0.12362	0.06852	-1.06298	-1.08896
I_930885	KIF24	Protein of unknown function	0.31506	-0.31506	-0.53554	-0.3436	-0.67627	-0.27683	-0.262	-0.72176	-0.05652	0.05652	0.15604	-0.08324	0.12044	0.32449	-0.47952	-0.10857	-0.11168	0.11169	-0.03759	0.17397	-0.01326	-0.04838	-0.36772	-0.71776
I_964064	KIF2C	Kinesin family member 2C (mitotic centromere-associated kinesin), putative microtubule motor protein, involved in mitosis, overexpressed and immunogenic in colon cancer patients, a potential therapeutic target in colon cancer	-0.07645	0.07645	-0.18865	-0.03815	0.06922	0.14589	-0.43243	-0.53858	0.06876	-0.06875	-0.09005	-0.00405	-7e-05	-0.01022	0.15074	0.22145	-0.02495	0.02494	0.47501	0.34715	0.2813	0.29346	-0.80175	-1.01878
I_1110211	KIF4A	Chromokinesin, a motor protein of the kinesin family, may help control the direction and speed of chromosome movement, and anterograde axon cargo transport	-0.06415	0.06414	0.13891	0.13288	0.08883	0.06892	-0.25795	-1.10063	0.02989	-0.02989	0.04766	0.14556	0.05796	0.13188	0.05209	0.21023	-0.00528	0.00528	0.22829	0.34741	0.11446	0.28045	-0.6292	-0.45473
I_957826	KIT	V-kit Hardy-Zuckerman 4 feline sarcoma viral oncogene homolog, tyrosine kinase that binds stem cell factor, involved in melanocyte development, inhibits apoptosis; gene mutations cause autosomal dominant piebaldism and sporadic adult mastocytosis	0.0214	-0.0214	0.2254	-0.07805	0.16409	0.0301	0.90478	0.72447	0.00863	-0.00862	0.07304	0.11644	0.1921	0.22239	0.30298	0.09314	-0.03587	0.03588	-0.21845	-0.00648	0.03227	0.018	0.02793	0.57231
I_964136	KLRC3	Killer cell lectin-like receptor subfamily C member 3, type II transmembrane molecule with a C-type lectin domain, dimerizes with CD94 and may transmit positive signals, may be invloved in natural killer cell inhibition, activation, and HLA recognition	0.42074	-0.42074	-1.99125	-1.18133	-1.27519	-0.7797	-1.6801	-1.18199	-0.18101	0.18101	-1.36611	-1.26917	-1.01797	-1.73981	-0.92608	-1.02532	0.64778	-0.64778	-1.78864	-0.22874	-0.50166	-0.55544	-1.64255	-2.45299
I_954746	KNSL7	Kinesin-like 7 (kinesin-like protein 2), a putative motor protein that may modulate mitotic progression, interacts with the forkhead-associated domain of pKi-67 (MKI67), which is a cell proliferation marker protein	-0.10015	0.10016	-0.00371	0.11138	-0.02262	0.0301	-0.27608	-0.29609	0.17077	-0.17077	-0.18905	-0.17706	-0.08921	-0.21526	-0.32069	-0.21052	0.04051	-0.04051	0.21091	0.22677	-0.00445	0.01048	-1.07474	-1.02712
I_963178	KPNA2	Karyopherin alpha 2 (importin alpha 1), subunit of the NLS (nuclear localization signal) receptor, binds to the NLS and plays a role in nuclear docking and import of proteins into the nucleus, may facilitate entrance of Epstein-Barr virus into the ...	-0.04036	0.04036	0.2378	0.30338	0.41592	0.35408	-0.55163	-0.53456	0.09858	-0.09858	0.138	0.04747	0.12598	0.22036	0.45962	0.4473	0.06376	-0.06376	0.12393	0.18088	0.01783	0.201	-1.39796	-1.40635
I_960232	KPNB1	Importin beta (karyopherin beta 1), a subunit of the NLS (nuclear localization signal) receptor complex, binds to the nuclear pore complex and mediates translocation of the importin alpha-NLS complex into the nucleus	0.11217	-0.11217	0.43882	0.27884	0.32528	0.01304	-0.32361	-0.40786	-0.13151	0.13151	-0.11651	-0.07638	-0.07325	0.20156	-0.28835	-0.16048	-0.0236	0.0236	0.5504	0.41385	0.42357	0.51603	0.01216	0.08414
I_958773	KRTAP1-1	Member of the keratin B2 high sulfur family, which are cysteine-rich proteins that form hair fibers with keratin intermediate filaments, has strong similarity to uncharacterized human KRTAP1.3	0.01917	-0.01917	1.55219	0.88834	0.41973	0.2263	-0.14797	0.19479	-0.07699	0.07699	0.12694	1.71465	1.12713	0.73307	-0.05125	-0.11022	-0.20335	0.20335	0.3018	-0.1818	-0.17954	-0.17875	0.5628	-0.09684
I_961373	L3MBTL	Lethal 3 malignant brain tumor-like (Drosophila), a putative DNA-binding protein, may play a role in chromosomal segregation and cytokinesis, localizes to nuclear speckles and condensed chromosomes; candidate tumor suppressor gene for myeloid ...	-0.03408	0.03409	-1.62137	-1.03806	-0.30312	-0.93966	-0.82298	-0.33246	0.52564	-0.52564	-1.49812	-1.29338	-1.02646	-2.14432	-0.5187	-0.59287	-0.19753	0.19753	-0.54223	0.04187	1.69851	0.71862	0.36667	1.90043
I_957225	LAMA4	Laminin alpha 4, a subunit of laminin 8, may be involved in cell adhesion	0.03762	-0.03762	-0.5268	-0.52119	-0.34205	-0.26838	1.19051	0.96187	0.13214	-0.13214	-0.24904	-0.34328	0.01024	0.02222	0.31531	0.30336	-0.07498	0.07498	-0.47229	-0.35391	-0.31726	-0.094	0.08862	0.18011
I_930788	LANCL2	LanC lantibiotic synthetase component C-like 2 (bacterial), contains an ATP/GTP-binding site motif A, has a predicted role in protein modification	0.03139	-0.03139	0.23902	-0.00114	0.25554	0.25067	0.19751	-0.02319	0.02429	-0.02429	0.21995	0.13028	-0.07608	0.05695	-0.48853	-0.24677	-0.03771	0.03771	0.21605	0.29184	-0.03335	0.30747	-0.04046	-0.24058
I_1100815	LANPL	Protein with high similarity to HLA class II associated protein 1 (human ANP32A), which is a putative protein phosphatase inhibitor and tumor suppressor, contains three leucine rich repeats, which mediate protein-protein interactions	-0.11907	0.11907	0.83821	0.31123	0.14501	0.14992	-0.03034	-0.27965	0.26162	-0.26162	0.13966	-0.06115	0.04544	0.03016	-0.49426	-0.35241	0.01464	-0.01464	0.0891	0.43611	0.09076	0.44185	-0.62558	-0.1636
I_928752	LBH	Limb-bud and heart gene, putative transcriptional activator, contains a carboxy terminal acidic domain	0.02531	-0.02532	0.62123	0.48956	-0.08362	-0.0559	0.09994	0.60774	-0.00346	0.00346	0.3332	0.11507	0.37698	0.09329	0.98241	0.55314	-0.10288	0.10288	0.32626	0.3232	-0.04	0.26689	0.84648	0.90788
I_929071	LBR	Lamin B receptor, a nuclear envelope inner membrane protein,may mediate interaction between chromatin and the nuclear envelope	-0.01654	0.01654	-0.18585	-0.00763	-0.00975	-0.10171	-0.2462	-0.37616	0.06945	-0.06945	-0.08202	-0.1129	-0.19271	-0.0839	-0.33889	-0.25879	0.01654	-0.01654	0.03295	0.0749	-0.20209	-0.07266	-1.1811	-1.32786
I_959292	LGALS3	Galectin 3, a beta galactoside and IgE-binding lectin, acts in cell adhesion, proliferation, migration, mRNA splicing, cell cycle, and angiogenesis, inhibits apoptosis, associated with various cancers	-0.17767	0.17768	-0.19985	-0.11255	-0.09391	0.02487	0.42388	0.64697	0.30562	-0.30562	0.01209	-0.07328	0.11039	-0.162	0.40859	0.60883	-0.03401	0.03401	-0.33895	-0.39507	-0.08719	-0.00891	0.32649	0.22068
I_934215	LGN	LGN protein, contains 10 Leu-Gly-Asn amino acid repeats, specifically interacts with the G(i) alpha 2 subunit (GNAI2)	-0.05675	0.05675	0.38403	0.3188	0.25883	0.05358	0.06104	-0.08847	0.0874	-0.0874	0.24591	0.18952	0.1641	-0.01129	0.51072	0.51256	-0.00314	0.00313	0.07718	0.2609	-0.04333	0.19737	-0.81326	-0.53269
I_932319	LHPP	Member of the haloacid dehalogenase or epoxide hydrolase family, has moderate similarity to uncharacterized C. elegans C13C4.4	-0.12054	0.12055	-0.26959	-0.07867	-0.20761	-0.01328	0.4214	0.69674	0.16749	-0.1675	0.12558	0.07147	0.04496	-0.18799	0.52784	0.63152	0.17468	-0.17468	-0.63318	-0.49723	-0.44478	-0.39952	-0.09708	-0.31233
I_1002411	LIG1	DNA ligase I, joins single strand breaks in DNA and functions in DNA replication and repair; mutations in the corresponding gene are associated with Bloom syndrome-like phenotype with immunodeficiency, growth retardation and predisposition to cancer	-0.11326	0.11326	-0.18345	0.05927	-0.12423	0.06731	-0.67461	-0.60994	0.2142	-0.21421	-0.27714	-0.52261	-0.06458	-0.30252	-0.8711	-0.69652	-0.01554	0.01554	0.27062	0.20765	0.19747	0.26996	-0.50023	-0.52909
I_937754	LIMS2	Protein with high similarity to LIM and senescent cell antigen-like domains 1-like (mouse Lims1l), which is a focal adhesion protein that may regulate cell adhesion and cytoskeletal organization, contains three LIM domains	-0.03853	0.03854	0.3453	0.45972	0.24848	0.13291	0.17029	0.28162	0.15591	-0.15591	0.43606	0.31788	0.22813	0.42844	0.75784	0.48073	-0.14093	0.14093	0.1922	-0.00954	-0.00217	0.13509	0.45278	0.55502
I_1002219	LIPA	Lysosomal acid lipase A (cholesterol esterase), deacylates cholesteryl and triacylglyceryl ester core lipids of low density lipoproteins in lysosomes; mutations in corresponding gene cause Wolman disease and cholesteryl ester storage disease	-0.09287	0.09287	-0.02464	0.13977	-0.14544	0.10127	0.48282	0.58638	-0.02555	0.02555	0.31209	0.12509	0.00962	0.00055	0.10736	0.05551	0.02896	-0.02896	0.0053	-0.13551	0.08463	0.03267	0.51881	0.26599
I_959995	LIPC	Hepatic triglyceride lipase, a member of the triacylglycerol lipase family that metabolizes high density lipoproteins; mutation in the corresponding gene may be associated with familial combined hyperlipidemia	-0.06661	0.0666	-1.12689	-0.62591	-0.17577	-0.1844	0.14531	-0.11516	0.14837	-0.14837	-0.13349	-0.38354	-0.02391	-0.29304	0.54859	0.7417	0.1201	-0.1201	-1.1258	-0.04611	0.64858	0.20315	-0.40478	-0.54102
I_944021	LMCD1	LIM and cysteine-rich domains 1, a member of group 3 of the LIM domain protein family, contains two C-terminal LIM domains and an N-terminal cysteine-rich domain, may be involved in protein-protein interactions that facilitate muscle development	0.05199	-0.05198	0.56577	0.47994	0.09837	-0.09457	0.69917	0.6563	0.03782	-0.03782	-0.09997	0.09196	0.02396	-0.0211	0.86903	0.80031	-0.02162	0.02162	0.10178	0.19383	-0.26342	-0.03231	-0.13206	-0.07532
I_958469	LMNB1	Lamin B1, present in the nuclear outer membrane, may be a structural member of the nuclear lamina, cleaved by proteases during apoptosis, targeted by autoantibodies in chronic fatigue syndrome	-0.04113	0.04113	0.37295	0.22133	0.0327	0.04338	-0.19426	-0.50131	0.22439	-0.22439	0.18254	0.12178	0.64976	0.60772	0.21869	0.27112	-0.04765	0.04765	0.03751	0.23706	-0.23685	0.14478	-1.75792	-1.56953
I_930492	LMOD1	Leiomodin 1 (smooth muscle), a member of the tropomodulin family of tropomyosin-binding proteins, detected as an autoantigen associated with the autoimmune disorders of Hashimoto thyroiditis, Graves disease, and idiopathic myxedema	-0.06387	0.06387	0.97497	0.77671	0.21801	0.34188	0.01547	0.45119	-0.03606	0.03606	0.44547	0.30876	0.21401	0.06546	0.18862	0.22057	-0.18214	0.18214	0.22937	-0.20609	-0.39149	-0.63335	0.09463	0.09987
I_958354	LNX	Ligand of numb-protein X, contains four PDZ domains and an NPXY motif, predicted to interact with the Numb phosphotyrosine-binding (PTB) domain and mediate Numb signal transduction	0.01912	-0.01913	0.5995	0.49478	0.08061	0.77751	0.88926	1.11718	0.3005	-0.3005	0.04225	0.26241	-0.1708	0.08495	0.58389	0.82154	-0.13714	0.13714	0.45088	0.32982	0.69021	0.20713	-0.24901	-0.81358
I_958748	LOC112840	Protein containing five WD domains (WD-40 repeats), which may mediate protein-protein interactions, has low similarity to uncharacterized C. albicans Orf6.3370p	-0.02008	0.02008	-0.78619	-0.33825	-0.3631	-0.26831	-0.60868	-0.10721	0.17127	-0.17127	-0.48458	-0.6923	-0.54895	-0.28738	-0.26796	-0.39778	-0.03097	0.03097	-0.07097	-0.06008	0.36568	-0.04852	-0.178	-0.50251
I_966780	LOC113115	Protein of unknown function, has high similarity to uncharacterized mouse 2610016C23Rik	-0.00593	0.00593	0.23333	0.20158	0.28774	0.2266	-0.40252	-0.59061	0.04957	-0.04957	-0.08478	-0.10196	-0.05882	-0.07976	-0.58168	-0.24514	0.03481	-0.03481	0.39018	0.46252	0.23451	0.21061	-1.11111	-1.02009
I_965048	LOC115294	Member of the protein-L-isoaspartate (D-aspartate) O-methyltransferase family, which play a role in repair or degradation of damaged proteins, has a region of low similarity to L-isoaspartyl (D-aspartate) O-methyltransferase (C. elegans PCM-1)	-0.04969	0.04969	0.21238	0.05276	-0.02914	0.04609	0.41546	0.5798	0.39152	-0.39152	-0.22177	-0.24229	0.00284	-0.10578	0.25069	0.37174	-0.09072	0.09072	0.09812	0.0944	0.06773	0.36828	0.5456	0.67922
I_942142	LOC129401	Protein of unknown function	-0.052	0.052	0.08759	0.15698	-0.0687	0.07105	-0.16956	-0.33007	0.15159	-0.15159	-0.04061	-0.29304	-0.10943	-0.2247	-0.33894	-0.30269	-0.04969	0.04969	0.01407	0.03846	-0.2402	-0.02664	-0.82821	-0.68346
I_958195	LOC134147	Member of the dienelactone hydrolase family, has low similarity to uncharacterized C. albicans Orf6.7908p	-0.1563	0.15629	-0.53586	-0.10267	0.04476	0.02062	0.13276	0.1518	0.14976	-0.14976	-0.32183	-0.22456	-0.03249	-0.35964	0.44774	0.41823	0.20104	-0.20104	-0.10673	0.23889	0.34455	0.26776	0.70182	0.65332
I_961982	LOC284361	Protein of unknown function	0.00296	-0.00296	-0.13919	-0.08118	0.11746	0.03692	0.09711	-0.07059	0.10328	-0.10328	-0.23238	-0.29393	-0.13071	-0.11266	0.35512	0.38419	-0.15226	0.15225	0.00896	0.00064	0.00068	0.0499	0.23573	0.3074
I_954946	LOC51159	Protein of unknown function	-0.18582	0.18582	0.61973	0.48314	-0.14448	0.14872	0.94784	0.74334	0.08377	-0.08377	0.6704	0.48258	0.50941	0.25978	1.37769	1.37887	-0.18116	0.18116	0.64328	0.18278	0.40177	-0.04821	0.9465	1.77464
I_950059	LOC51161	Protein of unknown function, has strong similarity to uncharacterized mouse 6430571L13Rik	-0.09273	0.09274	-0.07112	-0.00064	0.23578	0.0407	0.55158	0.39656	0.10232	-0.10232	-0.00934	-0.07039	0.0208	-0.01858	0.15812	0.15462	-0.10655	0.10655	-0.25916	-0.16215	0.01578	0.12169	0.4551	0.4419
I_935835	LOC51184	Member of the conserved hypothetical ATP binding protein family, has low similarity to a region of xeroderma pigmentosum group A protein (XPA) binding protein 1 (human NTPBP), which is a GTP-hydrolase that may facilitate nuclear localization of human XPA	0.0031	-0.0031	0.02542	-0.03096	-0.36998	0.01907	0.09587	0.08034	0.20374	-0.20374	-0.05421	-0.37758	-0.05164	-0.21149	-0.61594	-0.44109	0.07456	-0.07456	-0.26642	0.06052	-0.10773	0.02913	-0.64989	-0.55962
I_958363	LOC51334	Protein of unknown function	-0.18794	0.18794	1.19831	1.04787	0.84746	0.64835	0.91928	1.38054	-0.20757	0.20757	0.505	0.36597	0.50805	-0.04556	0.8216	-0.02185	-0.25625	0.25626	0.2024	-0.09637	0.54326	0.2598	0.81171	1.51483
I_959831	LOC51659	Member of the domain of unknown function (DUF392) containing family, has moderate similarity to uncharacterized C. elegans F31C3.5	-0.01047	0.01047	0.15256	-0.03955	-0.03165	0.02448	-0.41885	-0.61022	0.23065	-0.23065	-0.00257	0.00414	-0.08817	-0.23158	-1.24462	-0.86603	-0.01304	0.01304	0.09208	0.24802	-0.02364	0.20954	-0.86393	-0.75331
I_928855	LOC51668	Protein of unknown function	0.041	-0.041	0.08022	0.13585	0.11461	-0.01222	-0.00509	-0.02233	0.10492	-0.10493	-0.1075	-0.05917	-0.12312	-0.09785	-0.59526	-0.58692	-0.08145	0.08145	-0.11347	-0.05707	-0.14093	-0.06826	-0.4423	-0.43593
I_932540	LOC51685	Protein with strong similarity to prothymosin alpha (human PTMA), which plays roles in cell proliferation and differentiation and may play roles in the development and metastasis of various cancers, member of the prothymosin and parathymosin family	-0.06447	0.06446	0.81546	0.35835	0.22267	-0.02466	-0.10392	-0.21362	0.04174	-0.04173	-0.16135	-0.02893	-0.0843	0.20143	-0.70512	-0.49653	-0.03328	0.03328	0.01272	0.0372	0.0195	-0.03401	-0.90983	-0.89908
I_1110176	LOC51754	Protein of unknown function	0.4044	-0.4044	0.47888	0.36168	0.55618	0.74728	0.61118	0.79408	-0.03955	0.03955	0.13367	0.29325	0.13099	0.31518	0.53044	0.54326	-0.17359	0.17359	0.04482	-0.00285	0.13672	0.04239	0.68902	0.60021
I_1002142	LOC55924	Protein of unknown function, has high similarity to uncharacterized mouse 6530418L21Rik	0.00414	-0.00414	0.5119	0.15605	0.23951	0.03303	-0.28323	-0.60114	-0.36521	0.3652	0.26357	0.26976	-0.05943	0.36988	0.06861	0.14551	0.01082	-0.01082	0.12818	0.02437	0.04484	-0.17083	-0.15769	-0.17087
I_958110	LOC56898	Member of the short-chain dehydrogenase-reductase family, has low similarity to mouse H2-Ke6, which is a 17-beta dehydroxysteroid dehydrogenase that functions in androgen and estrogen metabolism and is associated with polycystic kidney disease	-0.02536	0.02536	-0.32892	-0.33096	-0.21212	-0.14108	0.40285	0.37415	0.1061	-0.10611	-0.2243	-0.34093	-0.06688	-0.11649	0.0822	0.03749	-0.0769	0.0769	-0.61575	-0.25221	0.15252	-0.04094	0.36073	0.36904
I_960069	LOC56906	Protein of unknown function	-0.02821	0.02821	0.22359	0.12838	0.09901	0.0642	0.21446	-0.2223	0.34301	-0.34301	-0.72159	-0.63596	-0.34254	-0.38365	-0.78961	-0.92347	-0.11832	0.11831	-0.57654	0.20332	-0.11987	0.056	-1.11172	-1.01841
I_946578	LOC83468	Member of the glycosyl transferase family 8, which transfer sugar residues to donor molecules during lipopolysaccharide and glycogen biosynthesis, has high similarity to uncharacterized human AD-017	0.04403	-0.04403	0.04504	0.00189	0.1208	-0.03877	0.2717	0.18072	0.00578	-0.00578	0.32154	0.00846	0.10878	0.07776	0.61644	0.30115	-0.24072	0.24072	-0.17143	-0.27358	-0.27454	0.07664	0.73524	1.0574
I_1152004	LOC85028	Protein of unknown function	0.02754	-0.02755	0.12295	0.07149	-0.10294	-0.19393	0.06314	-0.02386	0.04743	-0.04743	0.07923	0.09679	-0.15697	-0.12815	-0.4344	-0.25711	-0.01515	0.01516	0.1417	0.23928	-0.15966	-0.04438	-0.50749	-0.59492
I_960229	LOC90410	Protein of unknown function	0.01653	-0.01653	0.24682	0.15004	0.04508	0.02038	0.5782	0.42443	-0.00625	0.00625	0.04031	0.15369	0.13278	0.0251	0.31356	0.58327	-0.0702	0.07019	-0.12278	-0.41935	-0.2029	-0.08061	0.3167	0.37089
I_960235	LOC90507	Protein of unknown function, has high similarity to uncharacterized human KIAA0193	0.03332	-0.03332	-0.483	-0.38365	-0.67131	-0.55916	-0.54372	-0.47079	0.01182	-0.01181	0.10842	-0.13698	0.04443	-0.03803	0.30476	0.24009	-0.00897	0.00897	0.09181	0.04939	0.12515	0.24511	0.5665	0.66936
I_1152123	LOC92565	Protein containing five ankyrin (Ank) repeats, which may mediate protein-protein interactions, has a region of low similarity to a region of ankyrin 3 (rat Ank3), which links integral membrane proteins to and coordinates assembly of the cytoskeleton	0.01736	-0.01736	0.03443	-0.14468	0.14955	0.14021	0.53609	0.49055	0.31059	-0.3106	-0.03461	-0.1093	-0.10317	0.07395	0.59423	0.06651	-0.10525	0.10525	-1.08821	-0.42412	-0.56113	-0.27896	0.45739	0.61576
I_962838	LOXL1	Lysyl oxidase-like 1, putative lysyl oxidase that may function to crosslink extracellular matrix structural proteins, colocalizes with lysyl oxidase (LOX) at sites of fibrogenesis in lung fibrosis and stromal reactions of lung and breast cancers	-0.08468	0.08467	-0.25945	-0.07527	-0.11647	-0.14102	0.01743	-0.11566	0.0411	-0.0411	-0.12914	-0.41039	-0.01545	-0.06324	0.22666	0.17923	-0.02747	0.02747	-0.09662	-0.13079	-0.08621	0.06639	0.28668	0.37599
I_928314	LRIG1	Integral membrane glycoprotein (Img), a putative integral membrane glycoprotein that may function as a growth or tumor suppressor, may play a role in the development of various cancers	-0.05833	0.05833	-0.01384	0.03849	-0.20098	-0.11105	-0.02038	0.02324	0.05744	-0.05744	-0.28999	-0.03488	-0.13898	-0.45832	0.39265	0.48401	0.17536	-0.17536	-0.05632	0.0118	-0.17507	-0.05894	0.19438	0.14602
I_963196	LRP1	Low density lipoprotein receptor-related protein 1, receptor for alpha 2 macroglobulin and apoE-containing lipoproteins, mediates endocytosis and likely metabolism of various proteins and lipoproteins; gene variations may cause Alzheimer disease	-0.21744	0.21744	0.48556	0.43621	0.18459	0.36554	0.15793	0.31712	0.02902	-0.02902	0.18327	-0.08187	0.18341	0.16501	0.75872	0.07078	0.18571	-0.18571	0.27816	0.24254	0.2354	0.41133	0.76078	1.29566
I_929104	LRP8	Low density lipoprotein receptor-related protein 8 (apolipoprotein E receptor 2), a low density lipoprotein receptor, may be involved in signal transduction, cell migration, and receptor-mediated endocytosis	0.01473	-0.01473	-0.03058	-0.18463	-0.35782	-0.31325	-0.3072	-1.06776	0.1523	-0.1523	0.2006	0.19755	-0.18928	-0.31208	-1.17388	-0.44415	0.00998	-0.00999	0.22842	0.34209	-0.18085	0.09592	-1.17603	-0.94632
I_930052	LRRN3	Protein containing nine leucine rich repeats, an immunoglobulin (Ig) domain and a leucine rich repeat N-terminal and C-terminal cysteine rich domain, has a region of low similarity to a region of melanoma associated gene (human D2S448)	0.03849	-0.03849	0.7828	0.47907	0.38728	0.15516	0.19273	0.31132	-0.05129	0.05129	0.14412	0.38425	0.11711	0.28337	0.31958	0.38104	-0.06093	0.06093	-0.23842	-0.31844	-0.0332	-0.05457	1.05597	0.95938
I_957649	LSM6	Sm core protein F, a component of spliceosomal snRNPs that forms heteromers with other Sm-like proteins and binds specifically to U6 snRNA, may play a role in U4-U6 snRNP formation	-0.03125	0.03125	-0.05463	-0.03479	0.01147	-0.09275	0.17604	0.0371	0.13647	-0.13647	-0.31049	-0.20648	-0.29106	-0.3414	-0.52326	-0.55131	-0.02735	0.02735	-0.25488	-0.08103	-0.25446	-0.12112	-0.59821	-0.55207
I_930211	LSM8	U6 snRNA-associated Sm-like protein LSm8, part of a doughnut-shaped heteromer that binds U6 snRNA, contains a conserved Sm motif, interacts with the 3-end of U6 snRNA, plays a role in the duplex formation of U4/U6 snRNAs	-0.06514	0.06514	0.00515	-0.00426	-0.06379	-0.04374	0.04583	-0.17514	0.31159	-0.31159	-0.1552	-0.11387	-0.12385	-0.14735	-0.37014	-0.4267	-0.06143	0.06143	-0.26533	0.02031	-0.25021	0.06661	-0.6801	-0.66352
I_936438	LTBR	Lymphotoxin beta receptor, member of the tumor necrosis factor receptor family that specifically binds lymphotoxin-alpha/beta heterotrimers and mediates cytotoxic responses, may be involved in lymph gland development or organization	-0.18529	0.18529	0.28646	0.14342	-0.04297	0.16302	-0.1771	0.06874	0.09763	-0.09762	0.07965	0.02071	0.01252	-0.04574	0.51232	0.11165	-0.15403	0.15403	0.38927	0.08478	0.24659	0.30883	1.12836	1.09633
I_932496	LUM	Lumican, an extracellular matrix keratan sulfate proteoglycan, may be involved in the development and maintenance of corneal transparency, overexpressed in some cancers and may play a role in the growth or invasion of cervical cancer cells	0.06231	-0.0623	0.10662	-0.24413	0.1347	-0.06381	0.74444	0.57156	0.01266	-0.01267	-0.24929	-0.14294	-0.09539	0.08944	0.48425	0.53673	-0.11678	0.11678	-0.70659	-0.5878	-0.44986	-0.36477	-0.07426	0.01682
I_1100467	LY96	MD-2 protein, part of a lipopolysaccharide receptor complex, contributes to lipopolysaccharide and Toll-like receptor 4 (Tlr4) signaling, may play a role in the cellular defense response	0.04897	-0.04897	0.27044	0.03328	0.03738	-0.06936	0.57723	0.49811	0.18148	-0.18148	-0.04329	0.03147	0.06752	-0.33906	0.23036	0.66506	-0.11721	0.11721	-0.18351	-0.21075	-0.38312	-0.10735	0.22115	0.51937
I_957416	LYAR	Protein of unknown function, has high similarity to uncharacterized Ly1 antibody reactive clone (mouse Lyar), which may be involved in regulating cell growth	0.00459	-0.00458	0.19534	0.13723	-0.0813	-0.02491	-0.03737	-0.29384	0.2082	-0.2082	0.30266	0.30439	0.01204	-0.07975	-0.43007	-0.1069	0.00774	-0.00773	0.10368	0.22663	-0.13687	0.09501	-0.60057	-0.48921
I_1221955	LYN	Lyn protein tyrosine kinase, a non-receptor tyrosine kinase important in cytokine receptor- and IgE receptor-mediated signal transduction, regulates cell adhesion and apoptosis, plays a role in platelet activation and inflammatory responses	-0.31772	0.31772	-0.98056	-0.50306	-0.37794	0.02409	-0.87953	-1.10528	0.21904	-0.21904	-0.59954	-0.31769	-0.34332	-0.3467	-0.60696	-0.70733	0.16297	-0.16297	-0.72793	0.25198	0.94821	0.31874	-0.31822	-1.37199
I_959875	M17S2	Membrane component chromosome 17 surface marker 2 (ovarian carcinoma antigen CA125, Next-to-BRCA1), a protein containing a B-box-coiled-coil motif common among proteins with transforming potential, may play a role in the ubiquitin pathway	-0.08535	0.08535	-0.1262	-0.02052	-0.05329	-0.05645	0.41104	0.42436	0.26763	-0.26763	-0.10383	-0.18977	0.0395	-0.21302	0.20063	0.1197	-0.03913	0.03913	-0.28222	-0.04194	-0.07359	0.16575	0.22233	0.33261
I_957747	MAD2L1	MAD2 mitotic arrest deficient-like 1 (yeast), mitotic spindle checkpoint complex component with BUB1B, BUB3, and CDC20, inhibits anaphase-promoting complex activation, binds MAD1L1, altered expression is linked to several cancers and adult T-cell ...	0.04108	-0.04109	0.40156	0.13975	-0.31737	-0.06572	-0.3115	-0.58686	0.15676	-0.15676	0.06181	-0.20018	-0.02268	-0.07795	-0.53695	-0.47761	0.0733	-0.0733	-0.14127	0.3922	-0.06217	0.24715	-1.41189	-1.16895
I_961626	MAFF	V-maf musculoaponeurotic fibrosarcoma oncogene family protein F, a putative transcription factor that may regulate expression of the oxytocin receptor gene (OXTR) at parturition	0.11225	-0.11224	0.52621	0.50165	0.31498	-0.11037	0.05344	-0.38991	-0.11082	0.11082	-0.09805	0.01565	-0.08641	0.09025	0.15757	0.25268	-0.04811	0.04811	0.0843	0.23728	-0.24893	-0.06073	0.59496	0.66822
I_956861	MAIL	Molecule possessing ankyrin repeats induced by lipopolysaccharide, ankyrin repeat-containing protein that may play a role in signal transduction	0.04445	-0.04445	-0.47141	-0.45249	-0.01281	-0.14858	0.58902	0.05689	-0.34389	0.34389	-0.0749	-0.02607	-0.08177	0.11469	-0.02195	0.30518	0.12348	-0.12348	0.1712	-0.2011	0.22077	0.20538	0.42438	0.53676
I_943956	MAL	Proteolipid that is a component of the glycolipid enriched membrane microdomain, associates with GPI anchored proteins and Src-like tyrosine kinases	-0.18965	0.18965	-0.96786	-0.4721	0.03412	0.13028	-0.62294	-0.59196	0.21161	-0.21161	-0.2934	-0.30703	0.28652	-0.22593	-0.19751	0.11584	0.2437	-0.24371	-1.22097	-0.45545	-0.22878	-0.27403	-1.23874	-1.83789
I_962968	MAN1B1	Alpha1,2-mannosidase, cleaves a single alpha1,2-mannose residue from Man(9)GlcNAc(2) to form Man(8)GlcNAc(2), the first mannose trimming step in synthesizing Asn-linked oligosaccharides	-0.12349	0.12349	0.02509	-0.01177	0.15171	-0.00441	0.09537	-0.36966	0.00163	-0.00163	0.0114	0.11606	-0.05546	0.12291	0.51635	0.30047	0.11748	-0.11748	0.3644	0.10018	0.29612	0.46233	0.84855	1.52858
I_931320	MAN1C1	1-2-alpha-mannosidase IC, a calcium-dependent enzyme that hydrolyzes Man(9)GlcNAc(2) to form Man(6)GlcNAc(2) and Man(5)GlcNAc(2), activity is inhibited by 1-deoxymannojirimycin or kifunensine	-0.02686	0.02686	-0.48847	-0.18208	-0.02065	-0.05278	0.07035	-0.08189	-0.05325	0.05325	-0.21276	-0.0488	-0.09273	-0.12322	0.12397	0.14439	0.08463	-0.08463	-0.2415	-0.45859	-0.36858	-0.23507	1.03798	0.85469
I_962777	MAP3K2	Mitogen-activated protein kinase kinase kinase 2, protein serine/threonine kinase, mediates T cell receptor activation of JNK, but not ERK, signaling pathways, activates NF-kappa B and may modulate immune and inflammatory responses	0.00374	-0.00374	0.02006	-0.01961	-0.07128	-0.05858	0.19556	-0.07389	0.15546	-0.15546	-0.03892	-0.10187	-0.0793	-0.09792	-0.49163	-0.4193	-0.07828	0.07828	-0.20354	-0.05448	-0.24202	-0.00584	-0.41292	-0.33064
I_932382	MAPK8	Mitogen activated protein kinase 8, a serine-threonine kinase that regulates c-Jun (JUN), acts in receptor signaling, cell growth and differentiation, apoptosis, and response to stressors such as DNA damage, reactive oxygen, hypoxia and rRNA damage	0.03516	-0.03516	0.48299	0.15749	0.08306	-0.14298	0.34685	0.05156	-0.05631	0.05631	0.28563	0.40418	-0.07097	0.08517	-0.33485	-0.15975	-0.04317	0.04318	-0.12688	0.16043	-0.46757	-0.26048	-0.5074	-0.73336
I_929326	MARK1	Microtubule affinity regulating kinase, a serine/threonine kinase that phosphorylates microtubule-associated protein tau, leading to disruption of microtubules	-0.04488	0.04489	-0.32917	-0.18016	-0.16059	-0.14754	-0.69463	-0.62291	0.07276	-0.07276	-0.32412	-0.31669	-0.08709	-0.25118	-0.21401	-0.16765	-0.03945	0.03945	-0.03319	-0.07002	-0.07617	-0.07421	-0.31273	-0.42451
I_949916	MBD4	Methyl CpG binding domain protein 4, binds methyl-CpG DNA and functions as a glycosylase and an endonuclease in DNA mismatch repair, is a candidate tumor suppressor; mutations in corresponding gene are associated with colorectal neoplasms and ...	0.06196	-0.06196	0.19079	-0.09234	0.03074	-0.16163	0.33201	0.04533	-0.19045	0.19045	0.04394	0.1951	-0.08226	0.12757	-0.39139	-0.22279	0.01832	-0.01833	0.21269	0.2693	-0.04322	-0.02527	-0.27434	-0.33669
I_930310	MCFP	Member of the mitochondrial carrier protein family of membrane transporters, has weak similarity to S. cerevisiae Odc2p, which is a 2-oxodicarboxylate transporter that is specific for 2-oxoadipate and 2-oxoglutarate	-0.25369	0.25369	1.12962	0.01783	-0.3356	0.17899	-0.14164	0.06382	0.24183	-0.24183	-0.35828	-0.39462	-0.30993	-0.42758	-0.5853	-0.38303	0.03459	-0.03459	-0.18751	0.1124	-0.24849	-0.05329	-0.75235	-0.85857
I_1100848	MCM10	Minichromosome maintenance deficient 10, interacts with chromatin and the replication factors ORC2L, MCM2, and MCM6, may be involved in the initiation of DNA replication and mitotic S phase progression	0.26335	-0.26335	0.29783	0.08846	0.17861	0.27838	-0.03056	0.27168	-0.02635	0.02635	0.10623	0.21009	0.29983	0.23325	-0.63945	-0.26009	0.04127	-0.04126	0.35132	0.26492	0.02982	0.09605	-0.78675	-0.81932
I_928562	MCM2	Mini chromosome maintenance deficient 2, binds chromatin and appears to regulate the onset of DNA replication, inhibits the helicase activity of the MCM 4,6,7 complex; corresponding gene may serve as a marker of cellular proliferation for prostate cancer	-0.05865	0.05865	-0.21261	-0.14742	-0.01609	-0.11901	-0.36463	-0.45875	-0.17217	0.17216	-0.16029	-0.23013	-0.21697	0.07469	-1.07982	-0.84634	0.13258	-0.13258	0.3424	0.09975	0.01468	-0.03582	-0.87418	-1.10095
I_957598	MCM3	Minichromosome maintenance deficient 3, associates with the DNA polymerase alpha-primase complex, involved in the initiation of DNA replication, selectively degraded during apoptosis	-0.09651	0.09651	-0.17139	0.10188	-0.12845	-0.0561	-0.69095	-0.52275	0.32487	-0.32487	-0.21049	-0.47243	-0.14336	-0.21757	-1.36453	-1.42085	-0.03243	0.03243	0.03623	0.08247	-0.1998	0.02968	-1.17416	-1.17929
I_961391	MCM5	Mini chromosome maintenance deficient 5, transcriptional coactivator that interacts with STAT1, enhances IFNG -induced and STAT1 -dependent transactivation, localizes to unreplicated chromatin and may synchronize DNA replication with the cell cycle	-0.02413	0.02413	-0.04711	0.05521	0.08184	0.06386	-0.65693	-0.51983	-0.06982	0.06982	-0.08891	-0.15883	0.02041	0.08574	-1.04368	-0.93754	-0.06896	0.06895	0.5304	0.24765	0.45518	0.2367	-0.34361	-0.4911
I_928507	MCM6	Minichromosome maintenance deficient 6, a member of the MCM family of chromatin-binding proteins, has ATP-dependent helicase activity, and may have a role in initiation of DNA replication	0.06312	-0.06312	0.14482	0.02991	-0.03847	-0.11817	-0.16708	-0.33131	-0.08623	0.08623	-0.10599	-0.14241	-0.05566	0.09194	-1.29491	-1.12558	-0.01111	0.01111	0.05919	0.05383	-0.15903	-0.08078	-0.76129	-0.82425
I_929577	MCM7	Minichromosome maintenance deficient 7, forms a DNA dependent ATP dependent DNA helicase with MCM4 and MCM6, dissociates from replicated chromatin, likely to be involved in DNA replication	-0.1328	0.1328	-0.27101	0.13977	-0.09598	0.05894	-0.80069	-0.54097	0.19227	-0.19227	-0.15663	-0.40117	-0.07748	-0.1894	-1.10888	-1.08869	-0.04469	0.04469	0.40346	0.20158	0.13218	0.09949	-1.01954	-1.24457
I_941111	MDA5	Melanoma differentiation associated protein 5, an RNA-dependent ATPase and putative RNA helicase, inhibits cell growth and may induce apoptosis, contains a DEAD box, a CARD caspase recruitment domain, and a C-terminal helicase domain	0.16056	-0.16056	-0.72789	-0.64308	-0.14448	-0.05567	0.29188	0.11676	0.01278	-0.01279	-0.08053	-0.0687	0.01127	-0.25035	-0.19283	0.02998	0.01947	-0.01947	-0.17883	-0.03842	-0.03741	0.02233	0.10276	0.31663
I_1152493	ME3	Malic enzyme 3, NADP dependent mitochondrial form of malic enzyme, catalyzes the oxidative decarboxylation of malate to form pyruvate	0.11002	-0.11001	0.53536	0.47345	0.33233	0.48264	0.6895	1.2413	-0.21121	0.21121	0.18704	0.25659	0.42058	0.32495	0.69981	0.11437	0.11792	-0.11792	-0.03997	-0.05992	0.0511	-0.20098	0.16963	0.44643
I_959277	MED6	RNA polymerase II transcriptional regulation mediator, has roles in transcriptional activation and repression, member of a protein complex that hyperphosphorylates the C-terminal domain of RNA polymerase II	0.05158	-0.05159	0.5077	0.31467	0.25166	0.5469	0.05748	0.2958	0.01634	-0.01634	0.01221	0.31997	0.08854	0.04331	1.2518	0.67267	0.07875	-0.07875	0.21257	0.01098	0.08066	0.14972	0.0771	0.479
I_958564	MEF-2	Myocyte-specific enhancer-binding factor (myelin gene expression factor 2), an enhancer-binding protein that interacts with enhancers for muscle-specific genes to regulate transcriptional expression, may play a role in myoblast differentiation	-0.12276	0.12275	0.11612	0.11553	0.02037	0.22506	-0.22496	-0.37296	0.69121	-0.69121	-0.07478	0.02713	-0.02286	-0.04563	0.29088	0.74494	-0.1507	0.1507	0.38831	0.90703	0.9381	0.61448	-0.54224	-0.4912
I_930364	MELK	Maternal embryonic leucine zipper kinase, a putative protein serine/threonine kinase, interacts with zinc-finger-like protein 9 (ZPR9)	-0.07244	0.07243	0.38859	0.20602	0.13481	0.17722	-0.37995	-0.49957	0.23085	-0.23085	-0.05487	0.01449	0.14225	-0.11318	-0.85697	-0.65364	-0.02459	0.02459	0.38806	0.38574	0.05668	0.37972	-1.0321	-0.84264
I_958570	MESDC1	Protein of unknown function, has weak similarity to a region of talin (mouse Tln), which is a component of focal adehsion sites, links integrins to the actin cytoskeleleton, and functions in cell adhesion, cell shape control, and cell migration	-0.00717	0.00717	0.40863	0.27918	-0.04536	-0.06695	-0.20196	-0.54853	0.11119	-0.11119	-0.00574	0.15649	-0.01122	-0.28257	-0.22956	-0.19268	-0.10196	0.10196	-0.19673	0.07551	-0.3367	-0.05792	-0.71515	-0.69221
I_929142	MEST	Mesoderm specific protein, a paternally expressed member of the alpha-beta hydrolase fold family, functions in mesoderm development and may play a role in angiogenesis; loss of gene imprinting is linked with lung and breast carcinomas	0.14345	-0.14345	-0.74759	-0.89909	-1.06357	-0.43211	0.44853	0.60954	-0.0132	0.01319	-0.02235	0.03479	0.18137	0.39379	0.85394	1.00238	0.37335	-0.37336	-0.18773	-0.15786	-0.08507	-0.19467	-0.30652	-0.27845
I_958694	MFAP4	Microfibrillar associated protein 4, a microfibril-associated glycoprotein that may be involved in cell adhesion; deletion of the corresponding gene correlates with Smith-Magenis syndrome	-0.00039	0.00039	-0.28749	-0.25909	-0.14923	-0.31149	0.74457	0.77235	0.32427	-0.32427	-0.11635	-0.22353	-0.02754	-0.28269	0.6993	0.85769	-0.12567	0.12567	-0.52971	-0.33904	-0.48542	-0.14297	-0.21781	-0.04452
I_930262	MGC10911	Protein of unknown function	0.04498	-0.04498	0.13235	0.00286	-0.04906	-0.14587	-0.09616	-0.33765	-0.00506	0.00505	-0.1134	0.00398	-0.18392	-0.05854	-0.54501	-0.38622	-0.02226	0.02226	0.14443	0.17154	-0.02987	0.04119	-0.4524	-0.44897
I_1100076	MGC10992	Protein of unknown function	-0.17867	0.17866	-0.23839	-0.04866	-0.13552	0.23062	0.14651	-0.31756	-0.22423	0.22423	0.03306	-0.02571	0.28584	-0.21028	0.46984	0.84145	-0.0456	0.0456	0.12536	-0.21132	0.18337	-0.05286	0.83344	0.60073
I_931581	MGC11034	Protein with high similarity to human TU3A, which is a putative tumor suppressor involved in negative control of cell proliferation	-0.00403	0.00403	0.64937	0.59464	0.09959	0.01545	-0.23155	-0.34989	0.10016	-0.10016	0.24208	0.2473	0.00855	0.14573	-0.00568	0.02232	-0.01476	0.01476	0.33083	0.49648	-0.06573	0.01339	-0.18988	-0.18511
I_1000027	MGC12335	Member of the FAR-17a or AIG1-like protein family, has moderate similarity to uncharacterized androgen induced protein 1 (human AIG-1), which may function in androgen-regulated hair follicle growth	-0.15232	0.15233	-0.47178	-0.44469	-0.41594	-0.1461	-0.32727	-0.19111	0.20457	-0.20457	0.00228	-0.00388	-0.13047	-0.5236	-0.83027	-0.82755	0.11893	-0.11893	0.21452	0.39326	0.0118	0.1139	-0.46294	-0.43795
I_932550	MGC13047	Protein of unknown function, has high similarity to uncharacterized C. elegans F37C4.6	0.0273	-0.0273	-0.19995	-0.07599	-0.00638	0.08689	-0.13084	0.21682	-0.10916	0.10916	0.16311	-0.02904	0.21843	0.21281	0.6442	0.54291	0.02515	-0.02515	-0.14648	-0.29286	0.25399	0.05232	0.67308	0.64187
I_933576	MGC13183	Protein of unknown function, has strong similarity to uncharacterized mouse 2700091N06Rik	-0.18853	0.18853	-0.50352	-0.19548	-0.12762	0.06555	-0.40261	-0.27751	0.10604	-0.10604	-0.21323	-0.05395	0.04594	-0.22425	-0.24644	-0.3965	0.1238	-0.1238	-0.15105	-0.07722	0.08342	-0.0152	-0.58223	-0.84028
I_1000538	MGC14480	Protein of unknown function, has high similarity to a region of stimulated by retinoic acid 13 (mouse Stra13), which is a basic helix loop helix protein that regulates transcription, cell growth, apoptosis, and neuronal and myeloid cell differentiation	0.01279	-0.01279	-0.0079	-0.02057	0.11702	-0.21487	-0.23226	-0.31247	-0.0926	0.09261	0.00814	0.17145	-0.08901	0.11558	-0.43793	-0.34065	-0.04076	0.04076	0.07569	-0.02824	0.02649	-0.07037	-0.58235	-0.66311
I_931312	MGC14836	Member of the mitochondrial carrier protein family of membrane transporters, has low similarity to S. cerevisiae Odc2p, which is a 2-oxodicarboxylate transporter with specificity for 2-oxoglutarate and 2-oxoadipate	0.06537	-0.06537	1.43508	0.39925	0.40551	0.42331	0.34311	0.45125	-0.09095	0.09095	0.42257	0.72991	0.14656	0.41026	0.16611	0.77034	-0.15263	0.15263	-0.15556	-0.09519	-0.15112	-0.04435	0.11326	-0.67578
I_957231	MGC15435	Protein containing a BED zinc finger domain, has high similarity to uncharacterized human MGC10796	0.1112	-0.1112	-0.49886	-0.65161	-0.06513	0.32374	0.05588	0.30708	0.03132	-0.03131	-0.01077	-0.1213	0.3105	0.42565	0.36207	0.70132	0.28802	-0.28801	-0.34463	-0.24107	-0.61318	-0.10467	-0.73098	-1.31313
I_1000730	MGC15737	Protein of unknown function, has high similarity to uncharacterized mouse 1100001D19Rik	-0.07528	0.07527	0.14254	0.36365	-0.08434	-0.01207	0.43756	0.51258	0.02991	-0.02991	0.02351	-0.13297	0.1245	-0.04753	0.05148	0.04411	-0.02585	0.02585	-0.13684	-0.00485	0.3669	0.12489	0.81606	0.75111
I_1000196	MGC16169	Protein containing two protein kinase domains, a TBC domain, and a rhodanese-like domain, has a region of low similarity to a region of RAB6 GTPase activating protein (human GAPCENA), which plays a role in microtubule nucleation	-0.0005	0.0005	-0.06896	-0.53978	0.28053	-0.14207	0.57247	0.42865	0.29625	-0.29625	0.18421	-0.05148	0.05911	-0.06179	0.82089	0.52346	-0.25611	0.25611	-0.2324	0.188	-0.16595	-0.03283	0.45821	1.67524
I_1000670	MGC16212	Protein of unknown function	0.05009	-0.05009	0.30142	0.19677	0.09601	-0.11814	0.7854	0.73512	-0.0575	0.05751	0.36878	0.47565	0.19365	0.50539	0.89698	0.16445	0.39128	-0.39129	-0.26344	-0.34856	-0.39882	-0.09137	0.03275	1.26118
I_1000330	MGC16386	Protein of unknown function	-0.11975	0.11975	0.28609	0.33115	0.107	0.16182	-0.58607	-0.50862	0.32678	-0.32678	-0.01299	-0.05969	0.03576	-0.17498	-0.74005	-0.69338	0.0552	-0.05521	0.25612	0.37428	-0.11975	0.19974	-1.39074	-1.27057
I_965114	MGC19780	Protein of unknown function, has moderate similarity to uncharacterized S. pombe Spac5d6.06cp	-0.03242	0.03242	0.28818	0.19764	-0.0406	-0.18948	0.34685	0.23212	0.0765	-0.0765	-0.12918	0.03127	-0.00537	-0.10383	-0.4505	-0.3929	-0.10187	0.10187	-0.35798	-0.0918	-0.34606	-0.13107	-0.35294	-0.71515
I_1151827	MGC20533	Protein of unknown function	0.01783	-0.01784	0.29431	0.124	0.18669	-0.07844	-0.4541	-0.64237	-0.11307	0.11307	-0.0086	-0.01687	-0.15065	-0.04666	-0.56906	-0.34372	-0.02795	0.02795	0.53615	0.45463	0.03008	0.10594	-0.92414	-0.86212
I_1000741	MGC2452	Protein of unknown function	-0.2362	0.2362	0.35832	0.20277	0.01381	0.44629	0.66619	0.17747	0.09425	-0.09426	0.02886	-0.34263	0.34501	-0.05865	0.55726	0.34888	-0.06881	0.06881	-0.21799	-0.20112	-0.22266	0.01425	0.10246	0.6225
I_931238	MGC2574	Protein of unknown function	-0.05651	0.05651	-0.08786	0.12248	0.01661	-0.0313	-0.33206	-0.28225	0.09062	-0.09061	0.06976	-0.03812	-0.12893	-0.15399	-0.25482	-0.27066	-0.04305	0.04304	0.14946	0.1214	-0.04275	-0.01285	-0.39334	-0.47646
I_960656	MGC2615	Member of the mitochondrial carrier protein family of membrane transporters, contains three EF hand domains, has a region of low similarity to mouse Slc25a4, which is a heart-skeletal muscle adenine nucleotide translocator (ADP/ATP carrier)	-0.0947	0.0947	-0.2849	-0.06394	-0.27377	-0.04317	0.28099	0.2565	0.16772	-0.16773	-0.13368	-0.16714	0.17045	-0.16383	0.47219	0.28083	0.10303	-0.10303	-0.01485	-0.06672	-0.12142	0.12222	-0.63762	-0.34521
I_930932	MGC3038	Protein with high similarity to actin related protein 2-3 complex subunit 5 (human ARPC5), which interacts with p20/Arc (human ARPC4) during Arp2-3 protein complex assembly, contains one ARP2 or 3 complex 16 kDa subunit (p16-Arc) domain	0.08157	-0.08157	0.17051	-0.012	0.07622	-0.10347	-0.15823	-0.24932	0.08686	-0.08687	0.19337	0.29706	-0.13555	0.00927	-0.35413	-0.24068	-0.04897	0.04897	-0.03685	0.03622	-0.24166	-0.04752	-0.66313	-0.59997
I_929844	MGC3077	Protein of unknown function, has moderate similarity to uncharacterized C. elegans C44B7.7	0.01934	-0.01934	-0.04322	-0.21045	-0.17525	-0.15111	0.0597	-0.36599	0.19644	-0.19644	-0.07199	0.05677	-0.13936	-0.03357	-0.54654	-0.49584	-0.01647	0.01647	-0.16021	0.14244	-0.18674	0.09917	-0.70361	-0.61007
I_1000407	MGC32124	Protein containing a heme-binding domain, has a region of moderate similarity to a region of progesterone receptor membrane component 1 (rat Pgrmc1), which is a putative progesterone receptor that functions in the xenobiotic response	0.11713	-0.11713	0.0815	-0.17632	-0.01954	-0.1636	0.5179	0.03598	-0.24695	0.24695	-0.14486	-0.02373	-0.04178	0.08274	0.23752	0.23017	-0.01766	0.01766	-0.08858	-0.03248	-0.00809	0.14027	0.45221	0.59824
I_1151926	MGC33864	Protein of unknown function, has strong similarity to uncharacterized mouse Arl6ip6	-0.10529	0.10529	0.12026	-0.04233	0.12965	-0.04401	0.26143	-0.23014	0.01837	-0.01837	-0.0217	-0.07011	-0.16257	-0.08125	-0.56053	-0.31418	0.0084	-0.0084	-0.27569	-0.09093	-0.44466	-0.26138	-0.69098	-0.66759
I_928424	MGC34923	Protein containing a fibronectin type III domain, which are involved in cell surface binding	0.06206	-0.06206	0.1431	-0.23658	-0.38899	-0.20679	0.61827	0.59693	0.26976	-0.26975	0.11294	-0.35241	-0.17723	-0.15105	0.70197	0.53105	0.04983	-0.04983	-0.7499	0.23649	0.22348	0.14928	0.12175	0.80167
I_959238	MGC45438	Protein of unknown function, has very strong similarity to uncharacterized human MGC45438	-0.28557	0.28557	-0.51294	-0.48176	-0.96615	-0.59315	-1.22149	-0.45186	0.26311	-0.26311	0.05433	-0.11452	-0.16742	-1.26929	-0.97777	-0.9846	-0.32952	0.32952	-0.88126	-0.56412	-0.80224	-0.57255	-0.85071	-1.99779
I_959792	MGC4606	Protein of unknown function, has strong similarity to uncharacterized mouse 2900092E17Rik	-0.00816	0.00816	-0.01336	-0.10893	-0.13314	-0.10109	-0.12177	-0.33042	0.08726	-0.08726	-0.13436	-0.25887	-0.12215	-0.08102	-0.5056	-0.48123	-0.04579	0.04578	0.0861	0.16168	-0.01616	0.24004	-0.60934	-0.54337
I_1109178	MGC4701	Protein of unknown function, has high similarity to uncharacterized mouse MGC36997	0.08549	-0.08549	0.36468	-0.16536	-0.00219	0.07861	0.0665	-0.50209	0.12946	-0.12945	-0.04776	-0.21631	-0.44629	-0.27481	-0.80494	-0.51768	-0.13225	0.13226	-0.03225	0.34166	-0.13581	0.20285	-0.88368	-0.70332
I_963817	MGC5560	Protein of unknown function	-0.1214	0.1214	0.03999	0.03916	-0.12043	-0.01102	0.13921	0.04358	0.05821	-0.0582	0.19345	0.29659	-0.12544	-0.15042	-0.24248	-0.16025	-0.00048	0.00048	0.05151	-0.11606	-0.20868	-0.19884	-0.39345	-0.53647
I_933676	MGC5576	Protein of unknown function, has high similarity to uncharacterized human FLJ11273	-0.00278	0.00278	0.16241	-0.01368	0.06201	0.05665	-0.02583	-0.24879	0.0581	-0.0581	-0.05448	-0.19756	-0.08066	0.08259	-0.53258	-0.52139	0.02011	-0.02011	-0.02246	0.14379	-0.06406	0.21559	-0.84218	-0.76407
I_961906	MGC861	Protein of unknown function	-0.01735	0.01735	0.06642	0.14013	0.12068	0.07496	-0.6181	-0.61924	0.23572	-0.23572	0.04023	0.04727	0.02287	-0.14903	-0.48171	-0.47829	-0.07931	0.0793	-0.07972	0.10781	-0.14322	0.05038	-1.10915	-1.07752
I_957293	MGST2	Microsomal glutathione S-transferase 2, catalyzes the production of leukotrience C4 from leukotrience A4 and reduced glutathione, may be responsible for cysteinyl leukotriene formation in endothelial cells and contribute to detoxification by the liver	0.17731	-0.1773	-0.91295	-0.71075	-0.82418	-0.62592	-0.80297	-0.59607	0.15559	-0.15559	-0.94506	-0.78484	-0.7663	-0.84188	-0.8437	-0.39459	0.12148	-0.12148	-0.22157	-0.22264	0.02294	-0.01307	0.0777	-0.11756
I_960519	MIS12	Protein of unknown function	0.0196	-0.0196	0.01924	-0.13138	0.09491	-0.14118	0.13388	-0.10558	-0.22391	0.22391	-0.04589	0.10013	-0.06215	0.06733	-0.47126	-0.17688	0.07059	-0.07059	0.08296	-0.06499	-0.10349	-0.12664	-0.56769	-0.60781
I_931939	MKI67	Ki-67 antigen, nuclear protein expressed only in proliferating cells, redistributed from the nucleolus to the perichromosomal layer during mitosis, may be required for proliferation; used as an indicator of growth fraction with prognostic value in cancer	-0.20251	0.20251	0.59109	0.96151	0.39017	0.45092	-0.62855	-0.39613	0.41067	-0.41067	-0.11653	-0.43091	-0.12181	-0.29693	-0.43836	-0.40208	-0.00839	0.00839	0.41736	0.59711	0.50206	0.4648	-1.56022	-1.5135
I_1000743	MLC1	Megalencephalic leukoencephalopathy with subcortical cysts 1, implicated in megalencephalic leukoencephalopathy with subcortical cysts, a developmental and neurological disorder, and periodic catatonia, a familial subtype of catatonic schizophrenia	0.18053	-0.18054	-1.02147	-0.5378	-0.31734	-0.34641	-0.54007	-0.36637	-0.02691	0.02691	-0.76738	-0.26647	-0.33595	-0.624	-0.54986	-0.15881	0.4695	-0.4695	0.0153	0.25568	0.99811	0.29816	0.48509	0.95876
I_959129	MMP2	Gelatinase A, a matrix metalloprotease that degrades gelatin, type IV collagen and fibronectin; acts in tissue reorganization, angiogenesis and tumor cell invasion; mutation of the gene causes osteolysis and arthritis	0.05172	-0.05172	0.39565	0.68522	0.34707	0.17506	0.19194	0.4904	-0.105	0.105	0.26922	0.1117	0.01065	-0.11864	0.66631	0.38754	-0.06201	0.06202	0.44822	-0.16403	0.14562	-0.02831	0.66281	1.36805
I_930280	MMP3	Stromelysin 1, a matrix metalloprotease that functions in the turnover of extracellular matrix components during normal embryo development, morphogenesis and tissue remodeling, and tumor progression and invasion	0.05149	-0.05149	0.41628	0.3185	0.19315	0.07504	-0.52065	-0.53277	-0.1702	0.1702	0.2536	0.39215	-0.0414	-0.03291	-0.76683	-0.42106	0.20516	-0.20516	0.49971	0.59356	0.47346	0.09006	0.4579	0.65545
I_931459	MPHOSPH1	M-phase phosphoprotein 1 (MPM2-reactive phosphoprotein 1), ATPase and putative kinesin that may regulate mitotic processes, binds to PIN1 and is predicted to be regulated by PIN1 activity	-0.05285	0.05285	0.4695	0.20318	0.25992	0.19901	-0.1023	-0.12673	0.01731	-0.01731	0.08256	0.05035	-0.02184	-0.00593	-0.02088	-0.1047	-0.02566	0.02566	0.0529	0.22732	-0.0123	0.11007	-0.42761	-0.39507
I_1100516	MPP3	Membrane protein palmitoylated 3, has similarity to guanylate kinases and contains an SH3 and PDZ domain; corresponding gene may be associated with the neurological disorder, dystonia parkinsonism syndrome	-0.08744	0.08744	0.28057	0.28306	-0.29964	-0.09243	0.07272	-0.25274	0.13464	-0.13464	0.47851	0.33334	-0.00487	-0.38987	-0.27462	-0.29548	-0.08433	0.08433	-0.02145	0.08758	-0.55373	-0.17445	-0.21312	-0.10887
I_929535	MRPL15	Protein containing a ribosomal protein L15 family amino terminal domain, has a region of moderate similarity to a region of S. cerevisiae Mrpl10p, which is a mitochondrial ribosomal protein of the large subunit (YmL10)	0.08205	-0.08205	0.26286	0.23884	0.05912	0.24322	0.18682	0.44588	-0.02639	0.02639	0.29822	0.40788	0.05023	0.01202	-0.26344	-0.07787	-0.06165	0.06165	0.22049	0.01149	0.07906	0.05542	-0.03405	-0.4895
I_962098	MRPL39	Mitochondrial ribosomal protein L39, a putative subunit of the large subunit of the mitochondrial ribosome	-0.07326	0.07326	0.00619	0.06172	0.05527	0.08459	0.06688	0.05185	0.25324	-0.25323	-0.06757	0.0933	-0.00799	-0.18221	-0.32088	-0.40415	-0.02324	0.02324	-0.09576	0.01743	-0.15027	0.0464	-0.61703	-0.58655
I_1002110	MRVI1	Murine retrovirus integration site 1 homolog, a protein that may play a role in the control of cell proliferation; the mouse Mrvi1 gene is disrupted by non-ecotropic MRV viruses in some BXH2 leukemias	0.13521	-0.13521	0.059	0.1303	0.02183	-0.18651	0.15856	-0.03927	-0.24845	0.24845	0.43641	0.75144	0.58904	0.55294	0.83724	0.68674	-0.13208	0.13208	-0.04904	-0.1529	-0.08993	-0.15662	1.17693	1.06335
I_931207	MS4A4A	Membrane-spanning 4-domains subfamily A member 4A, contains four transmembrane domains, has similarity to CD20, HTm4 (CD20L) and high affinity IgE receptor beta chain (FCER1B)	0.03895	-0.03895	-0.86864	-0.6572	-0.12362	-0.37197	-0.72895	-0.7227	-0.0426	0.0426	-0.91289	-0.41881	-0.10677	-0.76001	-0.76895	-0.16204	0.21708	-0.21708	0.06229	0.15582	0.1551	0.22929	-0.75535	-0.91334
I_937312	MSH2	MutS homolog 2, DNA repair protein involved in mismatch recognition and in transcription coupled repair, deficiency causes microsatellite instability and is associated with hereditary nonpolyposis colorectal cancer and with sporadic tumors	0.01479	-0.01479	-0.2249	-0.10278	0.02498	-0.02794	-0.02035	-0.45528	0.06505	-0.06506	-0.24745	-0.21055	-0.23224	-0.09929	-0.81398	-0.57789	-0.0479	0.04789	0.06548	0.12975	-0.1007	-0.01753	-0.6642	-0.78803
I_937309	MSH6	MutS homolog 6 (E. coli), subunit of the MutS alpha complex that binds to mismatched nucleotides, functions in mismatch repair, recombination, and in drug susceptibility, deficiency is associated with atypical hereditary nonpolyposis colorectal cancer	0.04263	-0.04263	0.20783	0.10798	-0.07373	-0.16062	0.07625	-0.06072	0.21844	-0.21844	0.18384	0.18985	-0.09435	-0.09766	-0.53451	-0.44284	-0.05505	0.05505	-0.18209	-0.00611	-0.38587	-0.06837	-0.71662	-0.56872
I_1109772	MT1B	Metallothionein 1B, a member of the metallothionein family of heavy metal-binding proteins that function in metal homeostasis and protect against heavy-metal toxicity; lack of expression correlates with infiltrating ductal carcinoma of the breast	-0.07539	0.07539	-0.08697	0.22909	0.12475	0.03989	-0.99753	-0.8054	-0.19308	0.19308	-0.14559	-0.01902	-0.11302	0.34824	-0.5176	-0.31893	-0.31139	0.3114	-0.00442	-2.95825	-0.27005	-0.07259	-0.72709	-0.3745
I_959919	MT1E	Metallothionein 1E, member of a family of cysteine-rich heavy metal-binding proteins that functions in metal ion homeostasis, controls hepatic zinc levels, and protects against heavy-metal toxicity; upregulated in ER(-) invasive ductal breast cancer	0.06619	-0.06618	0.06744	0.09682	0.2576	-0.06185	-0.72883	-0.73253	0.00581	-0.00581	-0.05137	-0.12155	-0.08739	0.02334	-0.41282	-0.38264	-0.23039	0.23039	0.05295	-0.03111	-0.04906	-0.15378	-0.5491	-0.45418
I_1109770	MT1H	Metallothionein 1H, a member of the metallothionein 1 family of cysteine-rich heavy metal-binding proteins that function in metal ion homeostasis and protect against heavy-metal toxicity	-0.01531	0.01531	-0.07206	0.13758	0.20577	0.00092	-0.96498	-0.86874	0.16213	-0.16213	-0.03045	-0.13068	-0.08975	-0.20139	-0.47518	-0.50223	-0.18173	0.18173	-0.0656	-0.08581	-0.17871	-0.22003	-0.64338	-0.51381
I_1109775	MT2A	Metallothionein 2A, member of the metallothionein family of heavy metal-binding proteins, functions in metal homeostasis and stress response, protects against heavy-metal toxicity, may play a role in apoptosis, cell proliferation and malignant ...	-0.24336	0.24336	-0.05755	0.27519	0.0748	0.04874	-1.01882	-0.98206	0.10028	-0.10028	-0.32748	-0.18149	-0.30287	0.00032	-0.74839	-0.57076	0	0	0	0	0	0	0	0
I_959771	MTHFD1	C1-Tetrahydrofolate synthase, a trifunctional enzyme with 10-formyltetrahydrofolate synthetase, 5,10-methenyltetrahydrofolate cyclohydrolase, and 5,10-methylenetetrahydrofolate dehydrogenase activities; mutation associated with risk of neural tube ...	-0.12156	0.12155	-0.07588	0.15464	-0.09098	0.1061	-0.47327	-0.19342	0.08596	-0.08597	0.11141	0.18098	0.05177	0.05941	-0.38886	-0.35418	0.16443	-0.16443	0.26112	-0.08503	0.04087	-0.2148	-0.33591	-0.29578
I_1110282	MTL5	Tesmin, testis-specific member of the metallothionein family of heavy-metal binding proteins that have a role in metal homeostasis and protect against heavy-metal toxicity	0.33097	-0.33097	-1.6131	-1.56087	-0.91206	-2.10067	-1.09318	-1.44862	0.24466	-0.24466	-2.11563	-1.04135	-1.63087	-2.29906	-1.13227	-1.32123	-1.11614	1.11614	-3.39007	-3.88269	-0.52652	-3.67322	-2.41932	1.11614
I_1002300	MTRF1	Mitochondrial translational release factor 1, a mitochrondrial translational release factor that is likely to play a role in regulating translational termination	-0.06517	0.06517	-0.40194	-0.57181	-0.19188	-0.10413	0.47832	0.14615	0.24855	-0.24855	-0.1326	-0.08967	0.1751	-0.07473	0.12221	0.36366	0.06691	-0.06691	-0.24699	-0.04407	-0.16622	0.23384	-0.23532	0.042
I_962330	MX1	Myxovirus influenza resistance 1, interferon-induced member of the dynamin large GTPase superfamily involved in antiviral response to RNA viruses, binds and tubulates lipids; downstream target of Fanconi anemia protein FAC (FANCC)	0.01845	-0.01845	-0.38218	-0.6139	0.1437	-0.03309	0.13867	-0.14302	-0.1713	0.1713	0.09071	0.12607	0.00589	0.17295	-0.15405	0.24013	0.05211	-0.05211	-0.30394	-0.59699	-0.23125	-0.38961	0.17433	0.51795
I_966788	MYB	v-myb avian myeloblastosis viral oncogene homolog, a cell cycle regulator and transcription factor that stimulates cellular proliferation and inhibits apoptosis, functions in hematopoiesis; gene amplification is associated with leukemias and other ...	0.02689	-0.02689	-1.07973	-0.68318	-0.65804	-0.37308	-0.40383	-0.38216	-0.17703	0.17703	-0.0026	0.10183	-0.10307	0.03063	-0.59522	-0.46245	0.22534	-0.22534	0.38258	0.0126	-0.09997	-0.2808	-0.48942	-0.8623
I_961376	MYBL2	Myeloblastosis oncogene-like 2, a member of the Myb family of transcription factors, involved in the regulation of apoptosis, cell proliferation, and cell differentiation; increased expression may be associated with prostatic adenocarcinoma	-0.092	0.092	-0.07706	0.09126	-0.16733	0.10328	-0.68	-0.42569	-0.04469	0.04469	-0.04699	0.11851	0.02385	-0.1737	-0.92234	-0.62384	0.18944	-0.18944	0.34246	-0.20108	-0.06599	-0.4382	-1.45358	-1.39208
I_930011	MYBPH	Myosin-binding protein H, a protein localized to the A-band of skeletal muscle, contains fibronectin Type-III motifs and immunoglobulin C2 motifs which may be important for myosin binding	0.0539	-0.0539	-0.99617	-0.48142	-0.33858	-0.36911	-0.34689	-0.84915	-0.12835	0.12835	0.16089	0.03617	0.29624	-0.00635	0.21838	0.02328	0.08331	-0.08331	-0.72732	-0.90148	-0.60855	-0.60666	-0.4147	0.41561
I_950625	MYCN	Neuroblastoma-related (N-myc) oncogene, a member of the myc family of transcription factors, promotes cell-cycle progression and cellular proliferation; corresponding gene is amplified in neuroblastomas, retinoblastomas and small cell lung carcinomas	-0.02284	0.02284	0.2346	0.08747	0.2472	0.06281	0.53225	0.32019	0.01716	-0.01715	0.2541	0.20614	0.43041	0.14994	0.30968	0.26401	-0.07679	0.07678	-0.06255	0.10216	-0.07184	0.01138	0.43324	0.93805
I_964253	MYL5	Regulatory myosin light chain 5, a regulatory myosin light chain isoprotein, contains calcium binding motifs and putative phosphorylation sites, expressed in fetal but not adult skeletal muscle	-0.0441	0.0441	0.56579	0.15381	0.3942	-0.12011	0.58067	0.12467	-0.23661	0.23662	0.26148	0.07938	0.01376	0.244	0.4644	0.35742	-0.26757	0.26757	-0.07053	-0.03185	0.1067	0.12425	0.63535	0.92378
I_958202	MYO10	Myosin 10, a putative unconventional myosin motor protein, binds CLP (CALML3) in a calcium-dependent manner, may serve as a link between membrane signaling and the actin cytoskeleton	-0.08959	0.08959	0.27843	0.33173	0.25783	0.17136	-0.20268	-0.25514	0.24346	-0.24346	0.11928	0.04052	0.04601	-0.18996	-0.6699	-0.45693	0.04523	-0.04523	-0.03635	0.19124	-0.1298	0.12222	-0.06629	0.03968
I_1001949	NAGLU	Alpha-N-acetylglucosaminidase (Sanfilippo disease IIIB), one of the enzymes that catalyzes the stepwise degradation of heparan sulfate; mutation of the corresponding gene causes Sanfilippo syndrome type B (mucopolysaccharidosis III B)	0.04523	-0.04523	0.11198	-0.03499	0.05572	-0.04821	-0.02381	-0.00139	0.02436	-0.02435	-0.06146	-0.07802	0.04087	0.08141	0.35058	0.34455	-0.14935	0.14935	-0.05265	-0.11065	-0.02189	0.10032	0.37474	0.3615
I_940420	NASP	Nuclear autoantigenic sperm protein, a putative histone storage or transport protein that may play roles in the cell cycle and spermatogenesis, testicular and somatic alternative forms are produced by alternative splicing of mRNA	-0.09934	0.09934	-0.1405	-0.00346	-0.01555	-0.01277	-0.47521	-0.34327	0.29621	-0.2962	-0.0067	-0.06957	-0.03632	-0.19511	-0.56699	-0.36162	-0.12183	0.12183	0.15083	-0.04198	-0.10906	0.04317	-0.82015	-0.88509
I_1109205	NAV1	Neuron navigator 1, may be involved in axon guidance	0.07915	-0.07915	0.5308	1.28199	0.5282	0.47508	0.19455	0.50306	0.10597	-0.10597	0.11242	0.36471	0.23194	0.2806	0.4427	0.45284	0.10313	-0.10313	0.13062	-0.20606	0.1545	-0.2205	0.59021	0.56074
I_929423	NEK2	NIMA (never in mitosis gene a)-related expressed kinase 2, a serine/threonine protein kinase, involved in the centrosome cycle and the regulation of mitosis, phosphorylates and inhibits protein phosphatase 1	-0.13502	0.13502	0.58905	0.34088	0.33634	0.28011	-0.44444	-0.73061	-0.17205	0.17205	0.60883	0.49514	0.43173	0.3976	0.67031	0.77441	0.15261	-0.15261	0.44336	0.50841	0.27562	0.44684	-1.33667	-1.2475
I_1002148	NELL2	Nel-like 2, contains six epidermal growth factor (EGF) -like repeats, may play a role in signal transduction during neurogenesis; expression is upregulated in benign prostatic hyperplasia	-0.13736	0.13737	-0.59316	-0.46944	-0.28503	-0.28643	-0.39755	-0.33484	0.27155	-0.27156	-0.75209	-0.84162	-0.1786	-1.24023	-0.95089	-0.24142	0.0333	-0.03329	-0.59241	-0.48273	-0.05715	0.25413	-1.63614	-1.46555
I_1001997	NEO1	Neogenin, a member of the N-CAM family of cell adhesion molecules, may regulate differentiation and/or cell migration and may play a role in neurogenesis	-0.00118	0.00117	-0.97394	-0.5414	-0.12411	-0.04658	-0.24542	-0.34802	-0.1738	0.1738	-0.46123	-0.37228	-0.47282	-0.25707	-0.28263	-0.38077	0.1638	-0.1638	0.29716	0.03317	0.15765	-0.15163	-0.20503	-0.26825
I_928745	NESHBP	Protein containing a fibronectin type III domain, which are involved in cell surface binding	-0.09958	0.09957	0.92487	0.7964	0.22812	0.34031	0.53217	0.73343	0.07086	-0.07085	0.51701	0.11271	0.32842	0.22816	0.56375	0.36478	-0.19653	0.19654	-0.55127	-0.22245	-0.85286	-0.43614	0.36001	-0.31758
I_963641	NET1	Neuroepithelial cell transforming gene 1, a guanine nucleotide exchange factor for the Rho subfamily of GTPases, involved in actin filament organization; overexpression induces oncogenic transformation	-0.06508	0.06508	0.45596	0.40017	-0.08168	7e-05	-0.45632	-0.40912	0.1119	-0.1119	0.59992	0.65782	0.05816	-0.10559	-0.24136	-0.0845	-0.12218	0.12218	0.33738	0.14419	-0.04075	-0.06963	0.47266	0.41977
I_958830	NFAT5	Nuclear factor of activated T-cells 5, dimeric transcriptional activator that binds to TonE sequences and is activated by hyperosmotic stress in T cells, regulates TNF alpha (TNF) and lymphotoxin-beta (LTB) genes in osmotically stressed T cells	-0.1657	0.1657	0.61622	0.55847	0.60025	0.11252	0.33121	0.77256	0.04113	-0.04113	0.15887	-0.20676	-0.00384	0.24938	0.40702	0.48901	0.1049	-0.1049	-0.04412	-0.51208	-0.1155	0.27225	0.502	0.67752
I_930634	NINJ1	Ninjurin 1, a cell surface adhesion molecule of nerve and epithelial cells that is involved in neurogenesis, induced by nerve injury; map position of corresponding gene correlates with squamous cell carcinoma and hereditary neuropathies	-0.16349	0.16348	-0.39423	-0.10982	-0.15235	0.08182	-0.01561	0.10427	0.24612	-0.24612	0.02287	-0.18276	0.22098	-0.21	0.46515	0.54408	-0.06208	0.06208	-0.05875	-0.06166	0.17604	0.19943	0.41636	0.35619
I_961328	NIPSNAP1	NIPSNAP C. elegans homolog 1, a member of the NIPSNAP family of proteins, may have a vesicle transport-related function	-0.03293	0.03294	-0.04939	-0.38076	-0.23327	-0.22788	0.3761	0.09121	-0.01112	0.01112	-0.03313	0.09447	0.19756	0.22701	0.27425	0.25801	-0.02016	0.02015	0.17875	0.22855	0.24471	0.40429	0.72957	0.86176
I_928405	NIT2	Member of the carbon-nitrogen hydrolase family, which hydrolyze carbon-nitrogen bonds, has moderate similarity to a region of C. elegans NFT-1	-0.02521	0.02521	-0.27799	-0.42279	-0.22017	-0.13208	0.71828	-0.14311	-0.23072	0.23072	0.71558	0.50051	-0.37548	0.68679	0.06973	0.06632	0.03575	-0.03575	0.12328	-0.15754	-0.0393	-0.15341	0.42128	0.45024
I_965539	NLGN1	Neuroligin 1, protein with very strong similarity to rat Nlgn1 (neuroligin I), which is a neuronal cell surface protein that acts as a ligand for specific splice forms of the neuronal cell surface receptor beta-neurexin	0.03513	-0.03512	0.61904	0.1936	0.25708	0.07291	0.64125	0.32231	0.13428	-0.13428	0.4493	0.34815	0.25341	0.35138	0.80012	0.5477	-0.17807	0.17807	-0.08808	0.29966	-0.30648	0.26322	0.24002	0.44934
I_957193	NMU	Neuromedin U, agonist of G protein-coupled receptors GPR66 and NMU2R, induces Ca2+ mobilization, likely regulates smooth muscle contraction, and may function as an immunoregulatory molecule; precursor is likely processed into multiple bioactive peptides	-0.04311	0.04311	-0.98833	-0.47221	-0.09352	-0.01535	-0.20438	-0.36407	0.07279	-0.07278	-0.8628	-0.53624	-0.7792	-0.35547	-0.48018	-0.65512	0.0387	-0.0387	0.01338	0.13845	0.7597	0.17494	-0.44812	-0.86174
I_931875	NNMT	Nicotinamide N-methyltransferase, catalyzes the transfer of a methyl group from S-adenosyl L-methionine to nicotinamide to form N-methylnicotinamide, also N-methylates other pyridines and structurally-related drugs and xenobiotics	-0.0792	0.07921	-0.19897	-0.01041	-0.10315	-0.15348	0.33201	0.59872	-0.01144	0.01144	0.04536	0.16574	0.01979	0.19292	0.52801	0.43596	0.11915	-0.11915	-0.11918	-0.35018	-0.01496	-0.30058	-0.19326	-0.22597
I_957514	NOG	Noggin, an antagonist to the transforming growth factor beta family of signaling proteins, required for joint formation and neural induction; mutations cause proximal symphalangism and multiple synostoses syndrome, disorders of joint morphogenesis	0.0304	-0.0304	0.17899	0.15879	-0.21268	-0.16728	0.10026	-0.11318	-0.06406	0.06406	0.19763	-0.04038	-0.18924	-0.11304	-0.58123	-0.37187	0.09782	-0.09781	-0.24839	0.00872	-0.05166	0.09885	-1.07098	-1.2095
I_961730	NOL5A	Protein with similarity to S. cerevisiae Sik1p, a nucleolar KKE/D repeat protein involved in pre-rRNA processing	-0.20832	0.20832	0.05528	0.4778	-0.07332	0.11225	-0.4324	0.0574	0.0842	-0.0842	0.32491	0.28627	0.01495	-0.01177	-0.22704	-0.24132	0.23144	-0.23144	0.10746	-0.06993	-0.00853	-0.40077	-0.59002	-0.8239
I_964772	NOP5_NOP58	Nucleolar protein NOP5-NOP58, a delayed early response protein and component of the box C/D snoRNPs that may be involved in RNA processing and cell growth	-0.08955	0.08955	0.18481	0.24529	-0.05839	0.05356	-0.1558	-0.12612	0.2386	-0.2386	0.32974	0.37017	-0.01149	-0.13808	-0.23845	-0.14392	-0.01649	0.01649	-0.03158	0.07217	-0.14643	-0.0296	-0.63151	-0.79749
I_934704	NOSTRIN	Protein containing a Src homology 3 (SH3) domain, which bind proline-rich peptides, has a region of moderate similarity to a region of SH3-domain kinase binding protein 1 (rat Sh3kbp1), which is an actin cytoskeleton-associated SH3 domain adaptor protein	-0.15198	0.15197	-0.41448	-0.19408	-0.17549	0.00159	-0.30566	-0.17693	0.08319	-0.08319	-0.23607	-0.23647	-0.08895	-0.03847	-0.27825	-0.15275	0.19929	-0.1993	-0.18411	-0.11279	0.08256	-0.12648	-0.95533	-1.25846
I_959724	NP	Nucleoside phosphorylase (purine nucleoside phosphorylase), acts in the purine salvage pathway, reduces the effectiveness of purine-based anti-HIV drugs; deficiency results in severe combined immunodeficiency due to defects in T-lymphocyte function	-0.09607	0.09607	0.16236	0.24536	0.02935	0.1038	-0.61582	-0.4462	0.21049	-0.21049	0.31756	0.32944	-0.04229	-0.09134	-0.70228	-0.44529	-0.01897	0.01897	0.00439	-0.20959	-0.30496	-0.25952	-0.41192	-0.59942
I_961735	NPAS1	Neuronal PAS domain protein 1, a member of the basic helix-loop-helix-PAS family of transcription factors, expressed primarily in the brain	-0.0619	0.06191	0.42554	0.12914	0.23308	0.01487	-0.30393	-0.20124	-0.18547	0.18547	0.1794	0.19864	0.46834	0.04343	-0.31564	-0.53685	-0.07201	0.07202	0.11315	-0.01477	0.2594	0.04544	0.41772	1.15955
I_962971	NPTX1	Neuronal pentraxin I, an exclusively neuronal protein that may be involved in synaptic uptake of extracellular material	-0.00469	0.00468	-0.13742	-0.25437	0.0331	-0.00164	0.88695	0.6791	0.41044	-0.41044	-0.89046	-1.3889	-1.41858	-0.73889	0.08817	0.04434	-0.094	0.09401	0.03253	0.25515	0.05606	0.25435	0.59311	1.01775
I_931419	NR0B2	Small heterodimer partner, an atypical nuclear orphan receptor that interacts with a variety of receptors, mediates cholesterol metabolism and transcriptional repression of bile acid synthetic enzymes, mutations are associated with mild obesity	0.02742	-0.02742	-0.65	-0.46321	-0.00182	-0.13442	-0.01582	-0.06161	-0.14459	0.14459	-0.66706	-0.37145	-0.46307	-0.16321	-0.32764	-0.22496	0.00201	-0.002	0.03975	0.07505	0.29678	-0.09201	-0.06661	-0.64991
I_932430	NR4A1	Nuclear receptor subfamily 4 group A member 1, transcription factor that induces apoptosis through mitochondrial targeting, involved in response to stress via regulation of the hypothalamus-pituitary-adrenal axis	-0.1104	0.11041	0.64273	0.57878	-0.09731	0.15529	-0.09808	-0.36481	0.15688	-0.15688	-0.12503	-0.1322	-0.63815	-0.53602	-0.32648	-0.51055	0.05771	-0.05771	0.3558	0.79942	0.05383	0.21795	-0.71995	-0.95208
I_931795	NRP1	Neuropilin 1, a receptor for VEGF (165) and the axonal chemorepellent Semaphorin III, involved in organogenesis, axon guidance and angiogenesis, may regulate cell proliferation and response to wounding, upregulated in neuroblastoma vascular endothelium	0.04726	-0.04726	0.39911	0.24911	0.06051	-0.17049	0.24894	-0.0914	-0.23774	0.23774	0.11151	0.06363	0.09235	0.30236	0.39885	0.1421	-0.10047	0.10046	0.05266	0.15738	0.09461	0.09255	0.61876	0.75011
I_962871	NTN4	Protein with strong similarity to netrin 4 (beta netrin, mouse Ntn4), which acts in axon guidance, contains three laminin epidermal growth factor (EGF)-like domains, a laminin N-terminal domain, and an NTR or C345C C-terminal domain	0.07649	-0.07649	0.36656	0.10787	0.22279	0.29441	0.86138	0.60985	0.2592	-0.2592	0.1567	0.27172	0.00431	-0.08124	0.33403	0.82019	-0.12434	0.12435	-0.05049	-0.00818	-0.19247	0.01541	0.11305	0.20856
I_958741	NUDE1	Protein with strong similarity to nuclear distribution gene E homolog (Aspergillus) (rat Nude), which binds rat Pafah1b1 and may act in nuclear migration during cell migration, member of the NUDE protein C-terminal conserved region containing family	0.00463	-0.00463	0.15429	0.06367	0.22234	0.06732	-0.1659	-0.3735	0.11507	-0.11507	-0.16566	-0.09716	-0.02673	-0.04789	0.2156	0.22314	-0.10269	0.10268	0.16439	0.35051	0.24514	0.37238	-0.38978	-0.27074
I_961081	NUMBL	Numb-like (Numb-related), a protein-binding protein that contains a phosphotyrosine binding domain, interacts with EPS15 (mouse Eps15) and the EH domain of EPS15R (mouse Eps15-rs) and may regulate neurodevelopment or neuroplasticity	-0.13541	0.13541	0.66295	-0.03535	0.22837	0.28953	-0.22647	0.25179	0.35373	-0.35373	0.08645	-0.49465	0.00291	0.08026	0.59501	0.47054	0.07585	-0.07585	-0.265	0.33158	0.25824	0.25246	0.72155	1.50622
I_931961	NUP107	Nuclear pore complex protein, a component of a conserved nuclear pore sub-complex, may play a role in nuclear pore reassembly after mitosis	-0.00025	0.00025	0.02285	-0.0148	-0.01149	-0.03822	0.04604	-0.11267	0.27157	-0.27157	0.01406	-0.00088	-0.10023	-0.13366	-0.55159	-0.61243	-0.0686	0.0686	-0.03768	0.21757	-0.15953	0.18678	-0.83027	-0.69419
I_957221	NUP155	Nucleoporin 155, putative nucleoporin, may associate with both nucleoplasmic and cytoplasmic aspects of the nuclear pore complex, upregulated in a premalignant cell line; hemizygous gene deletion may be associated with mental and developmental ...	-0.04369	0.04368	-0.08323	-0.13348	0.22747	0.029	-0.06003	-0.85067	0.01619	-0.01619	-0.28542	-0.02456	-0.06971	0.07403	-0.32957	-0.0757	0.01374	-0.01375	0.15081	0.30765	0.12915	0.24457	-0.32833	-0.24713
I_961988	NUP62	Nuclear pore glycoprotein p62, a component of the nuclear pore, may be involved in nucleocytoplasmic transport, targeted for degradation during poliovirus infection	-0.11466	0.11465	0.25057	0.22424	-0.03179	0.12849	-0.38371	-0.24906	0.08016	-0.08016	0.01035	-0.05265	0.07028	-0.07219	-0.18472	-0.26763	-0.0913	0.0913	0.43288	0.3117	0.34262	0.30773	-0.10602	-0.18166
I_961835	NXT1	NTF2-like export protein 1, binds RAN, functions in the CRM1 (XPO1)-dependent nuclear export pathway	-0.02989	0.02989	0.16917	0.20895	0.06312	-0.08755	-0.08266	-0.37104	0.10059	-0.10059	0.25605	0.35159	-0.18861	-0.03357	-0.39951	-0.21631	-0.01925	0.01925	-0.01056	0.12867	-0.16356	-0.15465	-0.60761	-0.68741
I_960288	NY-REN-34	Putative zinc finger protein NY-REN-34 antigen, a zinc finger protein that is recognized by autologous antibodies in patients with renal-cell carcinoma	0.06958	-0.06958	0.3332	0.13181	-0.04603	0.1366	0.61758	0.57379	0.00147	-0.00148	0.41505	0.64801	0.31546	0.31163	0.4937	1.10019	0.23004	-0.23003	-0.37426	-0.39924	-0.07962	-0.42348	-0.228	-0.03007
I_936962	ODC1	Ornithine decarboxylase, catalyzes the decarboxylation of ornithine into putrescine, the first and rate-limiting step in polyamine biosynthesis	-0.03446	0.03446	0.09218	0.14174	-0.20215	-0.02172	-0.57929	-0.51928	0.24592	-0.24591	0.05472	-0.07906	-0.11092	-0.18195	-0.40058	-0.42882	-0.02803	0.02803	0.01634	0.16599	0.03968	0.1114	-0.6014	-0.51276
I_960747	OIP2	Opa-interacting protein 2, an epithelial cell protein that interacts with opacity-associated proteins on Neisseria gonorrhoeae outer membranes, may be important for bacterial invasion of human cells	-0.02138	0.02138	0.1284	0.15931	-0.04574	-0.01231	-0.183	-0.14211	0.18284	-0.18284	-0.06314	-0.13917	-0.1233	-0.12149	-0.64227	-0.59824	0.015	-0.015	0.09453	0.20227	-0.0698	0.11219	-0.96436	-0.97621
I_958277	OK_SW-cl.56	Protein with strong similarity to tubulin beta 2 (rat Tubb2), which polymerizes to form microtubules and binds alpha-tubulin (rat Tuba1) at the end of mitosis, member of the tubulin-FtzA family, contains a tubulin or FtsZ family C-terminal domain	-0.06968	0.06968	-0.02837	0.20641	-0.04301	0.14766	-0.89284	-0.60293	0.25237	-0.25237	0.03425	-0.24978	0.00388	-0.08104	-0.23461	-0.39346	0.02505	-0.02505	0.33521	0.21546	0.07872	0.38378	-0.40572	-0.36315
I_929815	OR2F1	Olfactory receptor family 2 subfamily F member 1, member of a family of G protein coupled, seven-transmembrane receptors expressed in nasal epithelium, involved in transduction of the olfactory response	-0.05077	0.05077	-0.20708	0.20164	-0.03602	0.05696	-0.1032	-0.26603	-0.10052	0.10052	0.14964	-0.20325	0.12298	-0.01191	0.22027	0.32859	-0.04149	0.04148	-0.07057	-0.09814	0.32166	-0.10486	0.48387	0.59299
I_959491	ORC6L	Origin recognition complex subunit 6-like (yeast homolog), a nuclear protein and putative subunit of the origin recognition complex (ORC) yet does not constitutively associate with other ORC units, may be involved in the initiation of DNA replication	-0.20713	0.20713	-0.12627	-0.03984	-0.2921	0.04158	-0.72993	-0.35606	0.00639	-0.00639	-0.08957	-0.0412	-0.06272	-0.26674	-0.53869	-0.59644	0.28315	-0.28315	0.14108	-0.02425	-0.02956	-0.20832	-0.79326	-0.86488
I_957291	OSAP	Protein of unknown function	0.03471	-0.0347	0.65109	0.29731	0.24389	0.0195	0.86804	0.76923	-0.16915	0.16915	0.3944	0.21275	0.5075	0.43842	1.25374	0.71973	-0.12871	0.12871	-0.08178	0.24939	0.04501	0.16292	1.02151	1.50787
I_944062	OXTR	Oxytocin receptor, a G protein-coupled receptor, signals through phospholipase C, functions in uterine muscle contraction, likely acts in parturition and lactation; agonist stimulation may inhibit cell proliferation in breast cancer	0.1096	-0.1096	0.60154	0.94166	0.46793	0.49889	0.03571	0.07547	0.06764	-0.06764	-0.09401	0.21198	0.08677	-0.81627	0.2176	0.5792	-0.02614	0.02613	-0.16312	-0.19431	-0.54358	-0.60504	0.56612	0.78548
I_957946	PA26	p53 regulated PA26 nuclear protein, induced in a p53 (TP53)-dependent manner by genotoxic stress, induced by growth arrest, widely expressed and primarily localized to the nucleus, may function in regulating cell growth	-0.14941	0.14941	-0.33576	-0.03399	-0.1667	0.41887	0.50666	0.35057	0.0134	-0.0134	-0.00876	0.06564	0.01386	-0.11638	0.52394	0.26568	0.01334	-0.01334	-0.24116	-0.12395	0.58433	0.19372	1.11575	0.72659
I_1002008	PA2G4	Proliferation associated 2G4, interacts with the juxtamembrane domain of ERBB3, dissociates from ERBB3 and translocates from the cytoplasm to the nucleus following treatment with heregulin	-0.05963	0.05962	0.06417	0.19018	0.16186	0.03041	-0.29731	-0.17038	0.01995	-0.01995	-0.04835	-0.06716	-0.11637	0.19256	-0.48761	-0.53282	0.06778	-0.06779	0.24866	0.16801	0.11234	0.08866	-0.3289	-0.5347
I_957189	PAICS	SAICAR (phosphoribosylaminoimidazole-succinocarboxamide) synthetase and AIR (phosphoribosylaminoimidazole) carboxylase, a bifunctional protein required for de novo purine biosynthesis	-0.14682	0.14682	-0.0421	0.17871	-0.09837	0.07304	-0.33067	-0.22353	0.16036	-0.16036	-0.07302	0.01664	-0.08537	-0.15246	-0.54312	-0.58739	0.11231	-0.11231	-0.12949	-0.0925	-0.09489	-0.10225	-0.55533	-0.81101
I_1109700	PAK2	p21 (CDKN1A)-activated kinase 2, binds CDC42 and RAC1, activated by caspase cleavage during stress-induced apoptosis leading to activation of the c Jun N terminal kinase (JNK) pathway, and may regulate actin organization and smooth muscle contraction	0.23246	-0.23246	0.78719	0.57388	0.18871	0.61753	0.23618	0.47745	0.09595	-0.09595	0.009	-0.2372	-0.13359	-0.28894	-0.04631	0.30648	-0.05828	0.05828	0.55291	0.52893	0.29123	0.41445	0.56042	0.59329
I_1100094	PBX4	Pre-B-cell leukemia transcription factor 4, a member of the Pbx family of transcription factors, complexes with Hox proteins, which may enhance Hox protein DNA binding specificity, involved in developmental processes, may play a role in spermatogenesis	-0.04043	0.04043	-0.10329	-0.01065	-0.04291	-0.16575	0.01502	-0.19626	-0.10614	0.10614	0.28642	0.19399	-0.09428	-0.02491	-0.17986	-0.05596	-0.0327	0.03271	0.6813	0.4387	0.4193	0.61645	-0.24428	-0.41667
I_960661	PCCA	Propionyl coenzyme A carboxylase alpha polypeptide, enzyme composed of alpha and beta (PCCB) subunits that degrades branched-chain amino acids, odd-numbered chain fatty acids, cholesterol and other metabolites; deficiency results in propionic acidemia	-0.02105	0.02104	-0.17853	-0.16088	-0.0757	-0.00491	0.34337	0.38113	0.23271	-0.2327	-0.28791	-0.15024	0.07803	-0.2808	0.10615	0.4335	-0.05511	0.0551	-0.04754	0.00016	0.09923	0.2289	0.22733	0.13059
I_961663	PCNA	Proliferating cell nuclear antigen, processivity factor for DNA polymerases delta and epsilon, interacts with many other DNA replication and repair factors, and has roles in DNA replication and repair and in cell cycle progression	0.00596	-0.00596	0.09606	0.03975	0.20202	0.10408	-0.2671	-0.3963	0.10451	-0.10451	-0.22421	-0.11483	-0.09692	0.04107	-0.7192	-0.75149	0.04256	-0.04256	-0.07772	0.1352	-0.04298	0.17611	-0.54855	-0.60622
I_958078	PCNT1	Protein of unknown function, has weak similarity to uncharacterized C. elegans NPP-2	0.11098	-0.11098	0.07046	-0.05007	0.09313	-0.07013	-0.08659	-0.13818	-0.09133	0.09133	0.059	0.12383	-0.11101	0.08525	-0.62034	-0.42326	-0.00697	0.00697	0.3367	0.20521	0.06568	0.11165	-0.50575	-0.51771
I_962372	PCNT2	Pericentrin-B (kendrin), an autoantigen that is an integral component of pericentriolar material, forms a complex with the centrosomal autoantigen pericentriolar material 1 (PCM1), may be involved in mitotic spindle assembly	0.45035	-0.45035	0.59679	0.93615	0.27143	0.96291	0.21896	0.81539	0.06396	-0.06396	0.37784	0.38704	0.10555	0.1114	-0.22892	0.02813	-0.05865	0.05865	0.54545	0.16363	0.21367	0.0287	-0.11535	-0.6827
I_966321	PDCD5	Programmed cell death 5, may play a role in apoptosis; overexpression increases apoptosis induced by growth factor deprivation in tumor cells	-0.08201	0.08202	0.12168	0.16625	-0.05138	0.01222	0.0962	0.13136	0.28438	-0.28438	-0.02937	-0.02992	-0.16144	-0.18533	-0.50969	-0.66868	-0.05953	0.05953	-0.21352	-0.10753	-0.17184	0.04901	-0.47708	-0.47809
I_1000728	PEPP-2	Protein containing a homeobox domain (homeodomain), has a region of low similarity to a region of paired related homeobox protein 2 (mouse Prrx2), which is involved in craniofacial development and may regulate sonic hedgehog signaling	0.46108	-0.46108	-0.64326	-0.67377	-0.47417	-0.45151	-0.86315	-0.56327	-0.24033	0.24033	-0.34236	-0.42373	-0.79896	-1.3843	-1.13282	-0.42722	0.25079	-0.2508	-0.27959	-0.6247	-1.30079	-0.53538	-2.63998	-2.44801
I_930386	PEX1	Peroxisome biogenesis factor 1, putative AAA ATPase that interacts with PEX6 and is required for peroxisomal protein import, genetic mutation is detected in patients with Zellweger syndrome, neonatal adrenoleukodystrophy, and infantile Refsum disease	-0.18308	0.18308	-0.13275	0.0043	0.00869	-0.01	0.3694	0.22673	0.10107	-0.10107	-0.16153	-0.26595	-0.06492	-0.29315	-0.19033	-0.06159	0.08129	-0.08129	-0.04398	0.08599	-0.2541	0.18466	1.00578	0.6639
I_1109132	PEX11G	Protein of unknown function	-0.02887	0.02887	-0.10428	-0.01688	-0.00938	-0.24467	0.16268	0.04517	-0.08804	0.08805	-0.07642	-0.05799	-0.00068	-0.01614	0.24573	0.17126	-0.0417	0.0417	-0.09604	-0.10184	0.09609	0.03446	0.51449	0.60154
I_928365	PFN2	Profilin 2, binds actin monomer, phosphatidylinositol-4,5 bisphosphate and polyproline, involved in regulation of actin polymerization, binds spinal muscular atrophy protein 1 (SMN1); mouse Pfn2 may be associated with spinal muscular atrophy	0.05634	-0.05634	0.25301	-0.00512	-0.19013	-0.12913	0.66352	0.60935	0.0313	-0.0313	0.12015	-0.09477	0.16682	-0.00576	0.41008	-0.01305	-0.09145	0.09145	-0.2834	0.0087	-0.21912	0.2434	0.64145	0.94115
I_957126	PGRMC2	Progesterone receptor membrane component 2, putative transmembrane steroid hormone receptor, preferentially expressed in placenta	0.08558	-0.08558	0.41497	-0.05216	0.1124	-0.13103	0.39375	0.29938	0.03435	-0.03435	0.06886	0.0752	0.04753	0.19992	0.64268	0.67931	-0.01738	0.01738	-0.0215	0.26351	-0.17041	0.23032	0.18148	0.31036
I_1000244	PHACS	1-Aminocyclopropane-1-carboxylate synthase, member of the alpha family of pyridoxal 5 phosphate-dependent enzymes, lacks aminocyclopropane 1 carboxylate synthase activity yet catalyzes the deamination of L-vinylglycine	-0.0284	0.02841	-0.01582	-0.10321	-0.18967	-0.08778	0.08259	0.24178	-0.19872	0.19872	0.17375	0.38598	0.19414	0.28808	0.42306	0.4866	0.18067	-0.18067	0.15238	-0.23917	0.21063	-0.0282	0.66597	0.66013
I_1001987	PHLDA3	Pleckstrin homology-like domain family A member 3, a member of the Ipl-Tih1-DAG51 subfamily of PH domain genes, may play a role in embryogenesis and morphogenesis; disruption of mouse Phlda3 results in normal viability and placental and fetal growth	0.00026	-0.00026	0.3326	0.23298	0.26758	0.08443	-0.00048	0.05064	-0.15808	0.15808	0.11454	0.18897	0.12029	0.28104	0.83158	0.57393	-0.14047	0.14048	0.27289	-0.32257	0.7273	0.63718	1.14183	1.48495
I_1002307	PIK3R3	Phosphoinositide-3-kinase regulatory subunit 3, binds insulin receptor (INSR) and insulin-like growth factor receptor (IGF1R), may be involved in regulating signaling	-0.06596	0.06595	0.70979	0.42533	0.74985	0.3075	1.04873	0.29758	-0.00014	0.00014	0.23884	0.01474	0.32026	0.3663	-0.16294	-0.01777	0.20891	-0.20891	0.03443	0.47328	0.34484	0.75029	0.96378	1.91601
I_934080	PILB	Pilin-like transcription factor, a putative transcription factor with similarity to the bacterial pilB and MsrA proteins, expressed maximally in the retina and ocular ciliary body, skeletal muscle, and heart	-0.06714	0.06714	-0.27856	-0.02406	-0.0977	-0.05745	0.19517	0.46957	0.19257	-0.19257	-0.0707	-0.15126	-0.06169	-0.16575	0.21386	0.13113	0.04604	-0.04603	-0.27693	-0.26199	-0.00477	-0.04534	0.29805	0.36482
I_944901	PIR51	RAD51-interacting protein, binds DNA and RNA, interacts with the recombinase protein RAD51, may be involved in DNA recombination and repair	-0.03744	0.03744	-0.13661	-0.15024	-0.01342	-0.119	-0.10678	-0.41541	-0.10336	0.10336	-0.17722	-0.03116	-0.17317	0.13551	-0.71486	-0.30491	0.15539	-0.15539	0.33754	0.24464	0.15693	0.10408	-0.67716	-0.93914
I_959306	PKD1	Polycystic kidney disease 1 (Polycystin), an integral membrane protein that forms a non-selective cation channel with PDK2, involved in cell adhesion; genetic mutations are responsible for most cases of autosomal dominant polycystic kidney disease	0.07624	-0.07624	-0.07055	0.12785	-0.31252	-0.23706	-0.41716	-0.26316	0.09556	-0.09557	0.28918	0.16303	0.11452	0.03853	0.50524	0.40398	-0.26811	0.26811	0.44721	0.00758	0.10518	-0.01204	0.33468	0.57452
I_959521	PKMYT1	Membrane-associated tyrosine- and threonine-specific CDC2-inhibitory kinase, controls the cell cycle by phosphorylating and inactivating cyclin-bound CDC2, may play a role in shuttling CDC2-cyclin B1 (CCNB1) complexes between the nucleus and cytoplasm	-0.11636	0.11636	0.10393	0.44396	-0.02039	0.08496	-0.77944	-0.78688	0.27175	-0.27175	0.11913	0.01546	0.01245	-0.36936	-1.08839	-0.85253	-0.13384	0.13383	0.50853	0.2473	0.08458	0.15757	-1.00537	-0.9624
I_966585	PLAB	Macrophage inhibitory cytokine 1, a member of the TGF-beta superfamily, functions as an autocrine regulatory molecule by inhibiting macrophage activation, may be a mediator of placental control of embryonic development, overexpressed in prostate cancer	-0.21816	0.21817	-0.79899	-0.38694	-0.34117	-0.05748	-0.26333	-0.13736	0.26136	-0.26136	-1.02741	-0.96278	-0.0635	-0.16267	0.66851	0.50032	0.08333	-0.08333	0.16559	0.01787	0.44994	0.44117	0.92582	0.71631
I_959467	PLEK2	Pleckstrin 2, member of the pleckstrin family of proteins, involved in regulation of the actin cytoskeleton, contains two pleckstrin homology (polyphosphoinositide binding) domains	0.13835	-0.13835	-1.4481	-0.53023	-0.02534	-0.27127	0.10294	-0.4848	-0.35822	0.35823	0.23581	0.20272	-0.04679	-0.64275	-0.8638	-0.59442	0.05635	-0.05635	0.34443	0.18794	-0.16503	-0.1279	-0.58864	-0.52088
I_962290	PLP2	Proteolipid protein 2, enriched in the colonic epithelium; may multimerize to form an ion channel	-0.07926	0.07926	0.03331	0.19079	-0.0461	0.00205	-0.38614	-0.35544	0.23302	-0.23302	0.00205	-0.13206	-0.10124	-0.16069	-0.50689	-0.60983	-0.12999	0.12999	-0.07939	0.00253	-0.00971	0.03729	-0.54295	-0.56419
I_958491	PMP22	Peripheral myelin protein 22, involved in peripheral nerve myelination and in growth and differentiation of Schwann cells; gene mutations are implicated in Dejerine-Sottas syndrome and Charcot-Marie-Tooth disease type 1A	0.08816	-0.08815	0.15962	0.06664	0.1221	-0.09149	0.72299	0.55335	-0.16285	0.16285	0.06398	0.17998	0.05045	0.27619	0.40297	0.3831	-0.0057	0.0057	0.01998	-0.01021	-0.17153	-0.08472	-0.35842	-0.42147
I_958299	PMSCL1	Polymyositis-scleroderma autoantigen 1 (75kD), a member of the RNase PH family, a 3-5 exonuclease of the PM-Scl/exosome complex, acts in AU-rich instability element (ARE) -stimulated mRNA decay, a nucleolar autoantigen linked to polymyositis-scleroderma	-0.01634	0.01633	0.27792	0.23314	0.15212	0.09909	0.10973	0.02997	0.28075	-0.28075	0.03019	-0.09832	-0.04671	-0.19888	-0.92265	-0.7882	-0.0946	0.0946	-0.06188	0.16137	-0.16122	0.0935	-0.731	-0.54553
I_928412	PMSCL2	Polymyositis-scleroderma autoantigen 2, member of the RNase D protein family, a component of the nuclear PM-Scl/exosome complex, a putative 3-5 exoribonuclease, may function in rRNA processing, a nucleolar autoantigen linked to polymyositis-scleroderma	0.04366	-0.04366	0.01488	0.04761	0.19323	-0.02454	-0.08172	-0.15958	0.1241	-0.12411	0.1598	0.19407	0.0523	0.02755	-0.25801	-0.01533	-0.06102	0.06102	0.07954	0.14549	-0.03474	0.05423	-0.49072	-0.42147
I_929209	PODXL	Podocalyxin like, a transmembrane sialomucin that is an L selectin ligand and important for lymphocyte adhesion and homing	-0.04881	0.04881	0.74225	0.72286	-0.07655	-0.09507	-1.7118	-1.53537	0.15048	-0.15048	0.11667	0.24682	-0.12165	-0.07445	-2.05824	-1.88427	0.01979	-0.0198	-0.07805	-0.22064	-0.91007	-0.86804	-0.42052	-0.56682
I_931882	POH1	26S proteasome-associated pad1 homolog, a subunit of the 26S proteasome, confers multidrug resistance and resistance to ultraviolet light when overexpressed	-0.02172	0.02172	0.10739	0.04709	0.06892	0.04537	-0.01233	-0.10842	0.04195	-0.04195	0.07244	0.17241	-0.06378	0.03549	-0.37548	-0.41537	0.00715	-0.00715	0.02249	0.02294	-0.07834	0.024	-0.38542	-0.41287
I_1110321	POLA2	Subunit of DNA polymerase alpha, which is an enzyme complex of four subunits with both DNA polymerase and RNA primase activities, required for nuclear DNA replication	0.00454	-0.00454	-0.01296	0.05748	0.14813	0.04211	-0.54652	-0.77726	0.12215	-0.12215	-0.20737	-0.05621	-0.06643	-0.03217	-0.87392	-0.7596	-0.03983	0.03983	0.15996	0.26182	0.04512	0.1466	-0.6916	-0.75467
I_961979	POLD1	Catalytic subunit of DNA polymerase delta 1, has essential roles in DNA replication and repair, polymerase activity is enhanced by proliferating cell nuclear antigen (PCNA)	0.04267	-0.04267	0.12201	-0.0243	0.0468	-0.10995	-0.50888	-0.59686	0.22275	-0.22275	-0.19853	-0.18764	-0.04197	-0.21172	-0.86471	-0.40621	-0.11981	0.11981	0.39939	0.48581	0.33997	0.41065	-0.50004	-0.27448
I_931062	POLD4	DNA polymerase delta subunit p12, a regulatory subunit that stimulates the DNA polymerase activity of DNA polymerase delta, which has roles in lagging strand DNA replication and possibly DNA repair	-0.00457	0.00457	0.06873	0.02237	0.12453	-0.13651	0.54444	0.5252	-0.14901	0.14901	-0.18871	0.13985	-0.07067	0.07691	0.18456	0.2495	0.02002	-0.02002	-0.01279	-0.23197	0.173	0.21281	0.53157	0.22932
I_931188	POLE3	Polymerase (DNA directed) epsilon 3 (p17 subunit), a histone fold protein that is a subunit of DNA polymerase epsilon and forms a DNA-binding complex with CHRAC15, functions as a component of CHRAC, an ISWI chromatin remodeling complex	0.02406	-0.02406	0.21385	0.17343	0.10994	0.06544	-0.19387	-0.42472	0.15127	-0.15126	0.05264	0.01815	-0.12088	-0.1547	-0.62125	-0.65824	-0.03135	0.03135	0.00668	0.26203	-0.15585	0.20276	-0.75294	-0.65786
I_928367	POLQ	DNA polymerase theta, a putative DNA polymerase resembling Drosophila mus308, which functions in DNA repair	-0.01096	0.01096	0.00585	0.09704	-0.04593	0.1832	-0.34947	-0.8161	0.38374	-0.38374	-0.2486	-0.12719	0.05552	-0.35678	-0.5664	-0.30476	-0.06998	0.06998	0.56649	0.5042	0.16535	0.5982	-0.55924	-0.14867
I_959434	POLR3K	DNA directed RNA polymerase III polypeptide K , a subunit of RNA polymerase III that may act in RNA elongation or transcription termination from the polymerase III promoter	-0.04672	0.04673	-0.32346	-0.08249	-0.0016	0.15495	-0.32521	0.00269	-0.08388	0.08388	-0.05874	0.12274	-0.15371	-0.03258	-0.45095	-0.38264	0.1961	-0.19609	-0.01901	-0.31615	-0.11004	-0.37167	-0.6692	-1.07577
I_960512	PP1044	Protein of unknown function	-0.0045	0.00451	0.15757	0.24435	0.22418	0.08945	0.34723	0.39217	-0.12767	0.12767	0.01481	-0.07814	0.02797	0.20999	-0.23778	-0.35547	-0.03169	0.03168	0.06359	-0.19287	-0.02915	-0.03627	0.66258	0.63016
I_958174	PPAP2A	Phosphatidic acid phosphatase type 2a, catalyzes the dephosphorylation of various lipid phosphates, regulates the level of lipid phosphates which are involved in signal transduction	0.00843	-0.00843	-0.10699	-0.05469	-0.01307	-0.07681	0.60459	0.5999	0.18423	-0.18424	0.02523	-0.10862	-0.00555	-0.12445	0.47172	0.33448	-0.02779	0.02779	-0.29463	-0.01371	-0.16307	0.08632	0.18447	0.39001
I_961447	PPGB	Protective protein for beta-galactosidase (cathepsin A), has serine carboxypeptidase activity, forms a complex with beta galactosidase (GLB1) and neuraminidase (NEU1), facilitates NEU1 transport and activation; genetic mutation leads to galactosialidosis	0.03948	-0.03948	-0.10071	-0.20548	-0.06899	-0.06624	0.25252	0.20605	0.06309	-0.06309	0.00278	0.00573	0.07665	0.11924	0.36062	0.44331	-0.02943	0.02943	-0.20241	-0.1992	-0.11721	0.02035	0.27037	0.29608
I_931912	PPIF	Peptidylprolyl isomerase F (Cyclophilin F), a putative mitochondrial protein that binds the immunosuppressant drug cyclosporin A	0.01176	-0.01176	0.30389	0.31033	0.061	-0.05387	-0.31262	-0.50968	0.21004	-0.21004	0.22131	0.1905	-0.08686	0.0444	-0.00604	0.00133	-0.09735	0.09735	-0.0067	0.10682	-0.24728	-0.02897	-0.4862	-0.37159
I_1002095	PPIL1	Peptidylprolyl isomerase (cyclophilin)-like 1, a putative cyclophilin-related protein, ubiquitously expressed in adult tissues (with highest expression in heart)	-0.17459	0.17459	-0.08926	0.14747	-0.09782	0.08139	-0.15608	-0.31229	0.24727	-0.24727	0.02109	0.02406	0.02412	-0.19963	-0.44664	-0.36957	0.05021	-0.0502	-0.15881	-0.02981	-0.21652	-0.09176	-0.48375	-0.60773
I_958738	PPIL5	Protein containing four leucine rich repeats, which mediate protein-protein interactions, has a region of moderate similarity to a region of C. elegans LET-413, which plays a critical role in the process of organizing and positioning adherens junctions	-0.10287	0.10287	0.17015	-0.08295	0.10169	0.03775	0.12357	-0.0889	-0.24167	0.24167	0.13597	0.11795	-0.11937	0.03741	-0.31149	-0.28467	0.00021	-0.00021	0.07444	0.15031	-0.0982	-0.01	-0.27418	-0.76291
I_932160	PPM1G	Protein phosphatase 1G magnesium-dependent gamma isoform, a type 2C ser/thr phosphatase as well as a pre-mRNA splicing factor, required for spliceosome assembly, may play a role in regulation of the cell cycle	0.01719	-0.01719	-0.034	-0.01361	0.10156	-0.02413	-0.32782	-0.30059	0.02816	-0.02817	-0.14845	-0.16821	-0.0951	0.18558	-0.29788	-0.32649	-0.01767	0.01767	0.14472	0.06154	0.07907	0.10545	-0.41893	-0.461
I_932078	PPP1R3C	Protein phosphatase 1 regulatory subunit 5 (protein targeting to glycogen), regulates protein phosphatase 1, may regulate glycogen synthase	0.03679	-0.03679	-0.02167	-0.0262	0.08029	-0.03535	0.88094	0.9058	-0.01372	0.01373	0.08672	0.28206	0.04764	0.17371	0.28673	0.43292	0.01588	-0.01588	-0.49148	-0.4605	-0.03323	-0.21035	0.51713	0.36885
I_960183	PRC1	Protein regulator of cytokinesis 1, associates with the mitotic spindle and is required for cytokinesis but not nuclear division, may function in spindle elongation, a substrate for phosphorylation by many cyclin dependent kinases	0.0001	-0.0001	0.16998	0.19875	0.24309	0.12706	-0.51565	-0.49317	0.07451	-0.07452	0.31823	0.35713	0.1252	0.18629	0.24767	0.1134	-0.05114	0.05114	0.04724	0.06716	-0.03929	0.11586	-1.15401	-1.18298
I_930444	PRCP	Prolylcarboxypeptidase (angiotensinase C), a serine carboxypeptidase that catalyzes the cleavage of C-terminal residues linked to proline, a activator of cell matrix-associated prekallikrein; the gene may be a candidate locus for essential hypertension	-0.01986	0.01986	0.01898	-0.05145	-0.18507	0.03846	0.3776	0.47019	0.05115	-0.05114	0.04911	0.22983	0.04067	0.06027	0.36518	0.56367	-0.00434	0.00434	0.0951	-0.14318	-0.03992	-0.06692	0.47033	0.14502
I_1152241	PRKAG2	Protein kinase AMP-activated gamma 2 non-catalytic subunit, a regulator of cellular ATP levels; mutation of the gene leads to heart disorders such as myocardial metabolic storage disease, Wolff-Parkinson-White syndrome and hypertrophic cardiomyopathy	-0.01434	0.01434	0.55501	0.347	0.01368	-0.0088	0.47929	0.50106	0.10131	-0.10131	0.32379	0.33022	0.31703	-0.09119	0.39361	0.3304	-0.17353	0.17353	0.28686	0.27171	-0.26138	0.00542	0.45891	0.70791
I_960122	PRO1855	Protein containing three leucine rich repeats, which mediate protein-protein interactions, has a region of low similarity to a region of S. cerevisiae Ccr4p, which is a component of the CCR4 transcriptional complex	0.15944	-0.15944	0.39679	0.08343	0.08895	-0.01945	-0.29612	-0.54563	0.13717	-0.13717	0.24742	0.26011	0.18234	0.11228	-0.10579	-0.09069	-0.17681	0.17681	-0.07645	0.15185	-0.14252	0.21852	-0.43632	-0.07255
I_964640	PROL2	Proline-rich protein B4-2, may be located in the nucleus and may function as a regulatory protein	-0.03454	0.03454	-0.08733	-0.03918	0.12137	0.00415	0.77492	0.61576	0.06733	-0.06732	-0.47133	-0.4459	-0.11821	-0.09333	0.18751	0.18398	-0.00647	0.00647	-0.24926	-0.10864	0.07797	0.12969	0.3428	0.38454
I_964740	PROS1	Protein S, a vitamin K-dependent factor regulated by binding to C4BPB, initiates anti-coagulation by activating protein C, also binds factors Xa and Va to inhibit prothrombinase; mutations in gene cause protein S deficiency, marked by thrombophilia	0.00084	-0.00084	-0.09153	-0.19182	-0.06444	-0.135	0.69326	0.39784	0.08223	-0.08223	-0.27083	-0.07544	-0.19829	-0.02938	0.10159	0.07292	-0.00959	0.00959	-0.56552	-0.3888	-0.37036	-0.21986	-0.05197	-0.10168
I_933648	PRSS11	Protease (serine, 11 (IGF-binding)), member of a family of serine proteases which interacts with alpha1-antitrypsin; increased expression is detected in the cartilage of patients with osteoarthritis	-0.08292	0.08293	-0.14269	-0.04623	-0.17583	-0.11364	0.3171	0.47542	0.19861	-0.19861	-0.03035	-0.14832	-0.06573	-0.08915	0.07568	-0.04609	-0.05817	0.05817	-0.44674	-0.48044	-0.22467	-0.25107	0.10203	0.22325
I_931055	PRX2	Paired-related homeobox protein 2, a member of the paired-related family of homeodomain-containing transcription factors, expressed during fetal, but not adult wound healing, may function in cutaneous regeneration and fetal skin development	0.03992	-0.03993	0.01885	0.26283	-0.00711	-0.14772	-0.29497	-0.39979	0.12452	-0.12453	0.14791	-0.27948	-0.01766	-0.27281	-0.45961	-0.62383	-0.25385	0.25385	-0.27275	-0.08705	-0.28603	-0.11324	-0.39955	-0.08866
I_961745	PSG1	Pregnancy specific beta-1-glycoprotein 1, a member of the immunoglobulin superfamily, induces the secretion of anti-inflammatory cytokines by monocytes and may modulate the immune system	0.20977	-0.20977	0.66419	0.23928	0.7159	0.52173	1.36554	0.5565	-0.37685	0.37685	0.35028	0.6613	0.41971	0.87452	1.5448	0.52816	0.37669	-0.37669	-0.91684	-0.45933	-0.67169	-0.3498	-0.46837	0.8504
I_1100576	PSG3	Pregnancy specific beta-1-glycoprotein 3, member of the pregnancy-specific glycoprotein (PSG) subgroup of the carcinoembryonic antigen (CEA) family	0.09519	-0.09519	0.81458	0.54118	0.32614	-0.06688	0.42292	0.41425	-0.05831	0.05831	0.20984	0.2792	0.19304	0.50518	0.72756	0.49968	0.06515	-0.06514	-0.00563	0.26417	-0.16178	0.03574	0.40244	0.6607
I_966924	PSMB8	Proteasome subunit beta type 8 (large multifunctional protease 7), peptidase involved in antigen processing for presentation by MHC class I molecules; increased expression in thyroid is associated with autoimmune thyroiditis and Gravess disease	0.00768	-0.00768	-0.00848	-0.10494	-0.00658	-0.11601	0.4455	0.37532	0.20318	-0.20318	-0.06962	-0.17522	0.02524	-0.02743	0.2723	0.25257	-0.00977	0.00977	-0.23304	0.08969	-0.02461	0.2065	0.18262	0.48512
I_966901	PSMB9	Proteasome subunit beta type 9, cytokine-inducible beta 20S proteasome subunit, provides cleavage specificity, acts in MHC class I antigen processing and in apoptosis inhibition; genetic polymorphism is associated with insulin dependent diabetes mellitus	-0.05702	0.05702	-0.25478	-0.24982	-0.13519	-0.02095	0.24075	0.26662	-0.06643	0.06644	-0.05445	-0.24171	0.04593	-0.02935	0.22997	-0.1499	-0.12801	0.128	-0.10524	-0.17657	0.28144	0.16126	0.51373	0.6996
I_958871	PSME1	Proteasome activator alpha subunit (P28 alpha), subunit of the proteasome activator complex p28 (REG) that activates the 20S proteasome and plays a role in the generation of MHC class I binding peptides, expression is induced by IFN-gamma (IFNG)	-0.04749	0.0475	-0.17567	-0.17781	0.01362	-0.02226	0.18507	0.33285	0.09161	-0.09161	-0.05957	0.03365	0.07645	0.13845	0.52573	0.70162	-0.00728	0.00729	0.02065	-0.25387	0.05021	0.07509	0.01792	-0.09977
I_957343	PTPN13	Protein tyrosine phosphatase non-receptor type 13 (APO-1/CD95 (Fas)-associated phosphatase), interacts with the Fas (TNFRSF6) cell-surface receptor and inhibits Fas-mediated apoptosis	-0.17313	0.17312	0.21104	0.17185	0.12793	0.16551	0.86048	0.62858	0.09404	-0.09404	0.10998	0.1186	-0.0153	-0.16544	0.3497	0.31381	0.00249	-0.00249	-0.52269	-0.29077	-0.3194	-0.24559	0.00656	-0.04152
I_1110235	PTS	6-pyruvoyltetrahydropterin synthase, catalyzes the second step in the biosynthesis of tetrahydrobiopterin, may be involved in CNS development; deficiency causes hyperphenylalaninemia and tetrahydrobiopterin-associated phenylketonuria	-0.00107	0.00108	0.2833	0.27117	0.04514	-0.01113	0.19415	0.08868	0.18058	-0.18058	0.04791	0.06326	-0.02316	-0.07258	-0.53466	-0.57876	-0.04369	0.04369	-0.18364	0.04327	-0.23588	-0.04404	-0.45534	-0.3504
I_958208	PTTG1	Pituitary tumor-transforming 1 (securin), a transcriptional activator that promotes cell proliferation and angiogenesis, involved in sister chromatin separation and euploidy maintenance; overexpression promotes cellular transformation and tumorigenesis	-0.02746	0.02746	0.02182	0.05856	0.19897	0.0871	-0.70688	-0.75343	0.02871	-0.02871	0.14864	0.03082	-0.08229	0.12251	0.27213	0.2707	-0.00087	0.00087	-0.11089	-0.13561	-0.04677	0.04015	-1.0964	-1.12164
I_957769	PTTG2	Pituitary tumor transforming gene 2, protein with strong similarity to human PTTG1, which is a proto-oncoprotein with PXXP motifs that may bind to SH3 domains, suggesting roles in intracellular signal transduction and tumor-specific pathogenesis	-0.09957	0.09957	-0.0345	0.19116	0.18169	0.24533	-0.60666	-0.32836	0.13536	-0.13535	0.35522	0.35452	0.14756	0.07493	0.35931	0.26487	0.00134	-0.00133	-0.19913	-0.24684	-0.0491	-0.1204	-0.87542	-1.08194
I_929699	PTTG3	Pituitary tumor-transforming 3, a protein that may be associated with tumorigenesis	-0.16709	0.16708	-0.10184	0.23019	0.11084	0.32667	-0.73089	-0.502	0.15367	-0.15367	0.22548	0.00107	-0.02409	-0.0353	0.29802	0.07827	-0.01987	0.01988	-0.22171	-0.22558	0.28021	0.06586	-0.85298	-1.02284
I_928369	PTX3	Pentaxin-related gene, a member of the pentaxin family of acute-phase proteins, may play roles in inflammation and the bacterial defense response, may limit autoimmune reactions during inflammation, early indicator of acute myocardial infarction	0.0135	-0.0135	-0.22044	-0.35258	0.04061	-0.02909	0.7027	0.74644	0.44426	-0.44426	-0.69372	-0.77695	0.01651	-0.20635	0.86465	0.91977	-0.16358	0.16358	-0.68579	-0.61475	-0.78008	-0.30276	-0.29137	0.15767
I_964631	PUS1	Pseudouridylate synthase 1, may function as a tRNA-pseudouridine synthase of type I	-0.07613	0.07613	-0.00447	0.01536	-0.20577	-0.17623	-0.20527	-0.66134	0.06897	-0.06897	0.19818	0.02426	-0.33914	-0.28008	-0.0835	-0.01515	-0.06222	0.06222	0.11101	0.18533	-0.22475	-0.05834	-0.41329	-0.33947
I_965309	PXMP2	Peroxisomal membrane protein 2 (22kD), expressed in embryonic glial cells and neurons	-0.04789	0.0479	-0.15957	-0.01168	-0.12744	-0.12161	-0.21314	-0.16378	0.10242	-0.10241	-0.05588	0.01201	-0.08895	-0.00767	-0.30939	-0.27368	0.09216	-0.09216	-0.17044	-0.20688	-0.08311	-0.085	-0.51773	-0.57392
I_958521	PYGL	Liver glycogen phosphorylase, catalyzes the breakdown of glycogen to glucose 1 phosphate, which then enters glycolysis; mutations in the corresponding gene cause Hers disease (glycogen storage disease type VI)	-0.02778	0.02778	-0.01158	-0.10717	-0.04113	-0.05266	0.59997	0.34289	0.19088	-0.19087	-0.19772	-0.22558	0.10692	0.15026	0.79806	0.85813	-0.06648	0.06648	-0.00909	0.18124	0.06712	0.2193	0.0967	0.23616
I_943251	RAB13	Ras-related GTP-binding protein 13, a putative RAB small monomeric GTPase that is likely to play a role in intracellular protein trafficking and cell adhesion	-0.00156	0.00156	-0.00183	-0.09011	0.02548	-0.10915	0.51325	0.56713	0.13218	-0.13219	-0.02525	-0.15822	0.00829	0.07022	0.19903	0.02353	-0.09252	0.09252	-0.21723	-0.12614	0.0338	0.17725	0.20983	0.46705
I_957779	RAB23	Protein with strong similarity to Ras-related protein 23 (open brain, open brain 2, mouse Rab23), which is a putative GTPase that is involved in development and mouse Shh signal transduction, member of the Ras superfamily of GTP-binding proteins	-0.21664	0.21664	0.68006	0.88377	0.14884	0.41414	0.33693	0.83893	0.0832	-0.08319	0.73196	0.59716	0.54135	0.17508	0.32225	0.28909	0.02293	-0.02293	0.17059	-0.13103	0.1967	-0.40166	-0.0745	0.16769
I_960059	RAB27A	Ras-related GTP-binding protein 27a, RAB GTPase required for vesicle transport and granule exocytosis, involved in immune response; mutations are associated with Griscelli syndrome and decreased geranylgeranylation is associated with choroideremia	0.0404	-0.0404	0.13249	0.0037	0.04311	-0.0523	-0.13582	-0.20524	0.01357	-0.01357	-0.14558	-0.05762	-0.12449	-0.17602	-0.52035	-0.32963	-0.0192	0.0192	-0.01181	0.05662	0.01309	0.04485	-0.40451	-0.3687
I_944011	RAB35	Ras-related GTP-binding protein 35, member of the Rab family of GTP-binding proteins, may function in vesicular transport	-0.05852	0.05852	0.24104	0.27454	0.02292	-0.04457	-0.30977	-0.39899	0.25533	-0.25532	0.20658	-0.11782	-0.02154	-0.27101	0.00273	-0.12872	-0.14739	0.14739	0.16699	0.30507	-0.24251	0.21623	-0.4496	-0.11913
I_929367	RABEX5	Putative Rab5 GDP-GTP exchange factor homolog, forms a complex with the Rab5 effector rabaptin-5 (RAB5EP) that is essential for clathrin-coated vesicle-endosome and endosome-endosome fusion	0.03486	-0.03486	0.51261	0.20568	0.02552	-0.12527	-0.03461	-0.24424	0.0028	-0.0028	0.41196	0.40121	0.11823	0.07351	-0.09326	-0.14863	0.00074	-0.00074	-0.18729	0.10893	-0.27079	0.02262	-0.24288	0.02253
I_931945	RACGAP1	Rac GTPase-activating protein 1, a GTPase activator involved in the growth and differentiation of hematopoietic cells	0.03419	-0.03419	0.36546	0.25038	0.08926	0.08819	-0.45912	-0.71666	0.09449	-0.09449	0.02337	-0.00936	-0.00475	0.09495	-0.18972	-0.08488	-0.02916	0.02915	0.19304	0.3956	0.04613	0.24994	-1.32194	-1.32747
I_944061	RAD18	Rad18, a protein binding protein that contains a RING-finger domain and a zinc-finger domain, likely involved in the repair of UV-damaged DNA	-0.17197	0.17197	0.80679	0.53272	0.16304	0.42167	0.1106	-0.13022	0.21124	-0.21125	0.35104	0.19647	0.06328	0.06164	-0.87555	-0.60185	0.02382	-0.02381	0.09864	0.01242	-0.18353	-0.13727	-0.589	-0.28407
I_929939	RAD21	RAD21 homolog (S. pombe), component of the cohesin complex, cleavage by separase (ESPL1) during anaphase is required for sister chromatid separation and cytokinesis, cleavage by caspases induces apoptosis	-0.01609	0.01609	0.00806	-0.02644	-0.03465	-0.0045	0.01981	-0.18471	0.16396	-0.16396	0.09324	0.20268	-0.03101	-0.13465	-0.10401	-0.20367	-0.02104	0.02104	-0.16093	0.11492	-0.19447	0.07978	-1.02755	-1.02118
I_958941	RAD51	RAD51 homolog (S. cerevisiae), a DNA repair protein that mediates double-strand break repair via homologous recombination, likely involved in meiotic and mitotic recombination, may be an essential cofactor for BRCA1 and BRCA2 tumor suppressor activity	0.03563	-0.03563	0.10433	-0.05481	-0.00483	-0.00971	-0.38945	-0.57143	0.06465	-0.06465	-0.11898	0.04057	-0.12016	-0.09217	-0.54293	-0.46038	-0.01834	0.01834	0.04165	0.17371	-0.03114	0.10467	-0.7718	-0.79978
I_1109984	RAD54L	RAD54 (S. cerevisiae)-like, member of SWI2-SNF2 family of DNA-dependent ATPases, double-standed DNA helicase that interacts with the RAD51 and functions in DNA recombination and repair, variant forms are associated with some primary cancers	-0.10113	0.10113	0.27036	0.24408	0.0634	0.00519	-0.68452	-0.62995	0.35264	-0.35265	-0.0892	-0.13824	0.04771	-0.21045	-1.0615	-0.84855	-0.01347	0.01347	0.37721	0.47654	0.08604	0.36667	-1.07396	-0.85377
I_958647	RAGE	Renal tumor antigen, a member of the MAP kinase superfamily, a serine threonine protein kinase containing the classic MAP kinase TEY motif, may play a role in signal transduction, may be a target for T-cell-based immunotherapy of renal cell carcinoma	0.01746	-0.01746	0.66474	0.48259	0.10047	0.03598	-0.57009	-0.54105	0.03806	-0.03806	0.34212	0.34308	0.06577	0.25839	-0.02595	-0.12537	0.02856	-0.02856	-0.07078	0.00267	-0.19576	-0.12226	-0.06388	0.08081
I_929867	RAI16	Protein of unknown function	-0.06755	0.06755	0.32192	-0.2067	0.39432	-0.00042	0.27115	-0.38824	-0.50063	0.50063	0.15741	0.28449	0.37101	0.14741	0.44015	0.54066	-0.05326	0.05327	0.06203	0.14768	0.22489	0.19487	0.52688	0.80716
I_960953	RANBP1	Ran binding protein 1, binds both GTP-bound and nucleotide-free RAN, enhances activity of Ran GTPase activating protein (RANGAP1), inhibits the nucleotide exchange activity of RCC1 (CHC1), involved in nuclear-cytoplasmic transport of RNA and proteins	-0.11769	0.11769	-0.00603	0.15486	-0.011	-0.0174	-0.55729	-0.41982	0.26713	-0.26713	0.0058	-0.09933	-0.08193	-0.09925	-0.62971	-0.76529	0.02656	-0.02657	-0.05115	0.06712	-0.13717	0.11285	-0.77543	-0.82556
I_960822	RAP2A	Ras-related protein 2A, a farnesylated ras family small monomeric GTPase primarily localized to the plasma membrane, negatively regulates Ras (HRAS) signaling and localizes RalGDS (RALGDS) and Rlf (RABL2) to the endoplasmic reticulum, may bind actin	-0.21207	0.21207	0.70243	0.77613	0.29362	0.43779	0.53978	0.17834	-0.18475	0.18475	0.66032	-0.12103	0.19776	0.60421	0.0579	0.04923	0.15326	-0.15326	0.89252	0.77851	-0.0998	0.43816	0.46397	0.08007
I_962449	RBBP7	Retinoblastoma binding protein 7, contains WD repeats, forms a complex with retinoblastoma (RB1) and tumor suppressor BRCA1, putative transcriptional repressor, inhibits cell growth and enhances apoptosis	-0.03843	0.03843	-0.03965	-0.03392	0.01228	-0.02123	-0.19953	-0.241	0.04633	-0.04633	-0.11344	-0.20442	-0.10698	-0.01488	-0.31749	-0.39936	-0.0198	0.01981	-0.0591	-0.05249	-0.11401	0.048	-0.53666	-0.5791
I_962846	RBBP8	Retinoblastoma-binding protein 8, a protein that binds RB1, BRCA1 and CTBP1, acts in E2F-RB1-mediated transcription repression and BRCA1-mediated DNA damage response; corresponding gene is mutated and protein level is elevated in several tumor cell lines	0.00703	-0.00703	0.30278	0.15693	-0.04991	-0.02752	0.06246	-0.1901	0.30126	-0.30126	0.01242	0.01846	-0.06013	-0.31489	-0.91296	-0.35589	-0.0085	0.0085	-0.00115	0.22657	-0.18529	0.0775	-0.74484	-0.56806
I_961366	RBL1	Retinoblastoma-like 1, an E2F binding protein, general transcriptional repressor and cyclin-dependent kinase inhibitor that regulates transcription, mediates cell cycle arrest and negatively regulates cellular proliferation	-0.08162	0.08162	1.72677	0.06611	-0.15472	-0.05551	-0.23263	-0.20386	-0.13903	0.13903	0.13475	0.04759	-0.01038	-0.04934	-0.40281	-0.13196	-0.08577	0.08577	-0.03218	0.23873	-0.28192	0.00181	-0.6579	-0.43736
I_1110396	RBM8A	RNA binding motif protein 8A, an RNA-binding nucleocytoplasmic shuttling protein that preferentially associates with mRNA produced by splicing, interacts with the putative tumor suppressor OVCA1 (DPH2L1) and the human homolog of Mago-nashi (MAGOH)	-0.0635	0.0635	0.07114	0.10282	0.00948	0.02681	-0.08897	-0.10562	0.19875	-0.19875	-0.10576	-0.21194	-0.11418	-0.13662	-0.47236	-0.49188	-0.02277	0.02277	-0.01869	0.04179	-0.20263	0.05049	-0.82097	-0.7938
I_961083	RBT1	RPA-binding trans-activator, contains an SH3 domain, interacts with the second subunit of replication protein A (RPA2), acts as a transcriptional co-activator, and displays higher activity in transformed cells	-0.06422	0.06422	0.48359	0.58078	-0.00168	-0.03496	0.07673	-0.02915	0.23549	-0.23549	0.28831	0.26228	-0.02524	-0.29788	0.01306	-0.07959	-0.09797	0.09797	0.15991	0.29111	-0.26458	0.07865	-0.02425	0.08114
I_929388	RCP9	Calcitonin gene-related peptide (CALCA) receptor component protein, associates with CGRP receptor (CALCRL) to facilitate CGRP-mediated signaling, associated with the acrosome and predicted to play a role in reproduction	-0.0856	0.0856	0.51525	0.65904	0.36388	0.62595	0.30998	0.65244	0.31508	-0.31508	0.28347	0.10198	-0.11854	0.02053	0.46835	-0.05965	-0.11716	0.11716	0.8977	0.27377	0.42093	0.21631	0.5786	1.45397
I_932342	RDH5	Retinol dehydrogenase 5 (11-cis and 9-cis), catalyzes the conversion of 9- and 11-cis-retinol to the corresponding cis-retinal, involved in vision; mutations in the corresponding gene are detected in patients with fundus albipunctatus	0.00106	-0.00106	0.47195	0.25883	0.1466	-0.02246	0.12347	0.1976	-0.12477	0.12476	0.059	-0.03775	0.00565	0.23469	0.39863	0.13063	-0.11913	0.11913	-0.01275	0.01679	-0.03229	0.01416	0.92701	0.80903
I_931169	RDX	Radixin, may link the cytoskeleton and plasma membrane proteins, may play a role in microvillar breakdown during apoptosis, may be a tumor suppressor in lung adenocarcinoma and an autoimmune antigen in rheumatoid arthritis	-0.07696	0.07696	0.12182	0.18519	-0.16153	0.03773	0.40016	-0.20342	0.22885	-0.22885	-0.03758	-0.09248	-0.12042	-0.23681	-0.47746	-0.4705	0.015	-0.015	-0.15353	0.08072	-0.3151	0.07779	-0.61432	-0.40237
I_930472	RECK	Reversion-inducing-cysteine-rich protein, a membrane-anchored protein which contains epidermal growth factor-like and serine-protease inhibitor-like domains, regulates matrix metalloproteinase-9 and inhibits tumor invasion and metastasis	-0.05567	0.05567	0.03916	0.28509	-0.0294	-0.02183	0.39775	0.61016	0.28721	-0.28722	0.06098	-0.08229	0.04843	-0.05863	0.56174	0.47466	-0.09172	0.09173	-0.28124	-0.18693	-0.20276	-0.25555	-0.02274	0.08686
I_929254	RECQL4	RecQ protein-like 4, a member of the RecQ family of DNA helicases, that may play a role in aging; mutations in the corresponding gene are found in patients with Rothmund-Thomson syndrome, which is associated with genomic instability and cancer	0.01962	-0.01962	0.06892	-0.10734	-0.05598	-0.21558	-0.74024	-0.86525	-0.04632	0.04632	-0.12687	-0.0246	-0.06521	0.02289	-0.68864	-0.35195	-0.12541	0.12541	0.69111	0.38669	0.36312	0.33359	-0.54015	-0.57668
I_957213	REV3L	REV3-like (DNA polymerase zeta catalytic subunit), an error prone DNA polymerase that catalyzes mutagenic translesion synthesis of damaged DNA, plays role in somatic hypermutation of antibody genes	0.02738	-0.02738	0.01336	-0.17569	0.03201	-0.14754	1.01259	0.74507	0.20486	-0.20486	0.0603	0.00976	0.10469	-0.03571	0.94813	1.04482	-0.114	0.114	-0.27489	-7e-05	-0.177	0.15277	0.03008	0.3923
I_930701	RFC2	Replication factor C 2, subunit of replication factor C (activator 1), which is an activator of DNA polymerases and an ATPase that loads proliferating cell nuclear antigen to the DNA template, coordinating leading and lagging strand DNA synthesis	0.02049	-0.02049	0.08639	-0.09452	-0.03222	-0.05982	-0.33861	-0.55258	0.01169	-0.01169	0.02953	-0.1685	-0.08017	0.08527	-1.07413	-0.91548	0.04947	-0.04947	0.47455	0.53939	0.22467	0.4441	-0.44394	-0.26862
I_1109792	RFC4	Replication factor C (activator 1) 4, a subunit of the replication factor C protein complex, which has ATPase activity and is required for formation of the PCNA clamp during DNA replication	-0.03582	0.03582	0.05462	0.05376	-0.03529	0.00974	-0.37812	-0.50177	0.20316	-0.20316	-0.06806	-0.14364	-0.04208	-0.2515	-1.09192	-1.0138	-0.00967	0.00968	-0.23729	0.02306	-0.31774	-0.01998	-1.3638	-1.32026
I_962870	RFC5	Replication factor C subunit 5, the 36.5 kDa subunit of the replication factor C (activator 1) complex that acts during DNA replication to load proliferating cell nuclear antigen (PCNA) onto the 3 ends of primer DNA	0.02138	-0.02138	0.02136	0.04758	0.05686	-0.12915	-0.31451	-0.54406	-0.02492	0.02492	0.09864	0.27762	-0.03693	0.12427	-0.96328	-0.73348	0.08927	-0.08926	0.42692	0.25365	-0.05896	0.05041	-1.09956	-1.04478
I_1002075	RGS7	Regulator of G protein signaling 7, a GTPase activator which negatively regulates G protein-coupled receptor signaling by binding to G protein alpha subunits, interacts with 14-3-3 proteins	-0.20966	0.20966	0.40938	-0.40277	0.04704	-0.35762	0.50071	2.474	0.0383	-0.03829	1.96256	0.49354	-0.43493	-0.82205	0.07467	-0.23602	-0.29583	0.29584	1.64526	0.43319	-1.28716	-1.28716	-1.83007	-0.6476
I_958035	RHOBTB3	Protein containing a BTB (BR-C, ttk and babor) or POZ (Pox virus and zinc finger) domain, which are found in some DNA and actin binding proteins and may mediate protein-protein interactions, has weak similarity to uncharacterized human RHOBTB1	-0.06574	0.06574	0.15209	0.00875	-0.1833	-0.07225	0.77861	0.72877	0.29711	-0.29711	-0.28997	-0.3954	0.00788	-0.38553	0.06884	0.05726	0.02258	-0.02258	-0.11966	0.22223	-0.15153	0.28326	0.44789	0.77163
I_959725	RNASE4	Ribonuclease (RNase A family) 4, a ribonuclease with specificity for uridine residues that is abundantly expressed in liver, expression is upregulated during neutrophilic differentiation	-0.13252	0.13252	-0.19479	-0.26207	-0.18073	-0.16794	0.64256	0.70313	0.0978	-0.0978	0.04475	-0.00665	-0.02158	-0.11787	0.4617	0.35311	0.20092	-0.20092	-0.40022	-0.16097	-0.31482	-0.08898	-0.17487	-0.05741
I_957041	RNASE6PL	Ribonuclease 6 precursor, a putative ribonuclease that plays a role in the negative regulation of proliferation, may be involved in senescence, may be a class II tumor suppressor, downregulated in ovarian cancer and in ovarian cancer cell lines	0.3317	-0.3317	-0.8583	-0.97354	-0.96461	-0.54383	-0.76236	-0.29822	0.10083	-0.10083	-0.11077	0.18049	-0.06954	0.07433	0.68729	0.60067	0.16071	-0.16071	-0.15811	-0.04219	-0.10945	-0.05665	0.57232	0.47196
I_962125	RNASEH2A	Ribonuclease H2 large subunit (large subunit of RNase HI, homolog of prokaryotic RNase HII), ribonuclease subunit, cleaves the RNA strand of RNA-DNA hybrids, may be involved in Okazaki fragment degradation during DNA replication	-0.09228	0.09228	-0.41162	0.09004	0.019	0.16778	-0.44612	-0.29043	0.10505	-0.10505	-0.04675	0.06583	-0.00367	-0.15364	-0.39748	-0.53391	0.02954	-0.02954	0.10625	0.0219	0.10437	-0.02529	-0.51964	-0.85326
I_931968	RNF26	Ring finger 26, a putative ubiquitin-protein ligase with an N-terminal leucine zipper domain and a C-terminal RING finger domain; elevated levels are found in several cancer cell lines and in some gastric cancers	-0.08336	0.08336	-0.03375	0.10004	0.00962	0.10911	-0.31781	-0.13222	0.3868	-0.38679	-0.27009	-0.39139	-0.2551	-0.27621	-0.2064	-0.16934	-0.03422	0.03422	0.16161	0.17985	-0.0304	0.11238	-0.52874	-0.46498
I_960642	ROCK1	Rho-associated coiled-coil containing protein kinase 1, binds Rho and is involved in actin cytoskeleton organization, cell migration, cytokinesis, superoxide anion production, membrane blebbing, and intrahepatic metastasis of hepatocellular carcinoma	0.24485	-0.24485	0.96615	0.95498	-0.09166	0.3998	0.28647	0.52056	0.13696	-0.13695	0.34895	0.73646	0.74068	0.64565	0.47241	0.56697	-0.09169	0.09169	0.41891	0.23337	0.47783	0.18147	0.75264	0.71324
I_931336	ROM1	Retinal outer segment membrane protein 1, retina-specific integral membrane protein localized to photoreceptor disk, forms dimers, variant is associated with retinitis pigmentosa, may interact with peripherin (RDS) in digenic form of retinitis pigmentosa	-0.01456	0.01455	-0.13434	-0.31921	-0.04186	-0.23797	0.62567	0.41195	0.16285	-0.16285	0.03473	0.00572	0.02644	0.02718	0.21031	0.07277	-0.13233	0.13234	-0.30028	-0.21185	-0.24546	0.08025	0.11628	0.49454
I_960249	RPA1	Replication protein A1 (70 kDa), a DNA replication factor A subunit, has roles in DNA replication, recombination, repair, may contribute to latent virus reactivation, inactivated by anti-cancer drug adozelesin	0.03737	-0.03737	-0.06196	-0.04391	0.09825	-0.08433	-0.04961	-0.27257	-0.22154	0.22154	-0.10577	0.03109	-0.09573	0.17216	-0.42155	-0.27766	0.03384	-0.03384	0.23301	0.01768	0.01341	-0.07884	-0.45512	-0.60935
I_1002345	RPA2	Replication protein A2, a subunit of the single-stranded DNA-binding protein complex replication protein A, interacts with other DNA repair proteins, plays roles in DNA replication, repair, and recombination	-0.0401	0.0401	-0.08257	-0.02479	-0.15534	0.0082	0.15426	0.0257	0.14218	-0.14219	-0.17321	-0.2078	-0.11113	-0.20316	-0.73225	-0.58047	0.05389	-0.05389	0.09401	0.11815	-0.05344	0.15337	-0.53946	-0.57646
I_929900	RPA3	Replication protein A 3, a subunit of replication protein A, which is a single-stranded DNA-binding protein complex with roles in DNA replication, repair, and recombination	-0.0138	0.0138	0.04204	-0.0063	0.10791	-0.04448	-0.20588	-0.33039	-0.00496	0.00496	-0.20592	-0.13299	-0.16032	-0.06298	-0.67504	-0.496	-0.03902	0.03902	-0.01253	-0.08011	0.01856	0.03367	-0.32475	-0.41185
I_1151933	RPL39L	Protein with high similarity to ribosomal protein L39 (S. cerevisiae Rpl39p), contains a ribosomal L39 domain, which are present in the large ribosomal subunit	0.00776	-0.00776	0.09295	0.04854	0.02614	0.0273	0.34533	-0.04191	0.00405	-0.00406	0.30711	0.27431	0.00409	0.04645	-0.24541	-0.19829	0.00447	-0.00447	-0.08428	0.08899	-0.08442	0.05118	-0.51292	-0.4625
I_960083	RPS27L	Protein with very strong similarity to ribosomal protein S27 (metallopanstimulin-1, human RPS27), which is a component of the small 40S ribosomal subunit and a putative transcription regulator, member of the ribosomal S27 family	-0.0897	0.0897	0.03838	0.07885	0.0211	-0.01046	0.5693	0.70451	0.20825	-0.20825	-0.06899	-0.20774	0.00328	-0.05942	0.3324	0.25042	-0.01346	0.01345	-0.2765	-0.25524	-0.27251	-0.04869	0.14337	0.24782
I_959046	RRAD	Ras-related protein associated diabetes, member of the ras family of GTPases that binds calmodulin and tropomyosin, may function in regulating body composition and energy expenditure, upregulation in muscle is detected in some studies of type II diabetes	0.1143	-0.1143	0.22074	0.25318	0.36315	0.14137	0.33133	0.00338	-0.19556	0.19556	-0.02	0.15766	-0.03641	0.11433	0.30918	0.41048	-0.02137	0.02137	0.09963	0.053	0.14864	0.01841	0.49901	0.55816
I_930353	RRM1	Ribonucleotide reductase M1 subunit, may associate with either RRM2 (S-phase induced) or p53R2 (UV-induced) to yield a functional complex that reduces ribonucleotides to deoxyribonucleotides, a rate limiting step for DNA synthesis	-0.05233	0.05233	0.01937	-0.02972	-0.27145	0.06805	-0.37497	-0.36826	-0.06994	0.06994	0.0999	0.292	0.03543	0.0906	-0.72256	-0.60549	0.19794	-0.19794	0.11793	-0.22434	-0.02179	-0.16249	-0.94545	-0.97264
I_965619	RRM2	Ribonucleotide reductase subunit M2, associates with RRM1 to yield an enzyme that reduces ribonucleotides to deoxyribonucleotides, a rate limiting enzyme for DNA synthesis; overexpression is associated with hydroxyurea resistance	-0.02363	0.02363	0.17194	0.3062	0.13646	-0.04654	-0.56572	-0.535	0.20766	-0.20765	0.04878	-0.10583	-0.13857	-0.18703	-1.34748	-1.36822	-0.04177	0.04177	0.1145	0.26815	-0.28228	0.02147	-1.53129	-1.46247
I_929113	RRM2B	p53-inducible ribonucleotide reductase small subunit 2 homolog, involved in the p53 (TP53) checkpoint for damaged DNA repair, associates with RRM1 to yield a functional enzyme that converts ribonucleotides to deoxyribonucleotides	-0.0136	0.0136	0.23653	0.04522	0.1746	0.02265	0.58526	0.20609	-0.03694	0.03693	0.01124	-0.12528	-0.05045	0.12631	0.31811	0.272	-0.02871	0.02871	-0.12669	0.02156	0.00048	0.17736	0.45337	0.69816
I_931313	RRP40	Exosome component Rrp40, a subunit of the exosome which plays a role in RNA processing in the nucleus and in degradation of AU-rich element containing mRNAs in the cytosol, and is autoantigen in polymyositis-scleroderma overlap syndrome	0.01966	-0.01966	0.09698	-0.02289	-0.0753	-0.06467	0.09285	-0.07447	0.20095	-0.20095	-0.04595	-0.03156	-0.07742	-0.18085	-0.44251	-0.49019	-0.02705	0.02704	-0.19539	0.10253	-0.20178	0.07345	-0.64437	-0.41715
I_929695	RRS1	Member of the DUF660 protein of unknown function family, has a region of moderate similarity to S. cerevisiae Rrs1p, which is a regulator of ribosome synthesis	0.01363	-0.01363	0.33604	0.36794	-0.08009	-0.01687	-0.15715	-0.34594	0.26708	-0.26709	0.39134	0.43192	0.02359	-0.26161	-0.06556	0.31544	-0.19047	0.19047	0.09988	0.0556	-0.18461	-0.05009	-0.59561	-0.54805
I_931433	RTKN2	Protein containing a pleckstrin homology (PH) domain, has moderate similarity to rhotekin (human RTKN), which is a downstream effector molecule of RhoA (ARHA) that strongly activates the serum response element	0.02236	-0.02235	0.41088	0.21756	0.25861	0.06947	0.00758	-0.71408	0.217	-0.217	-0.19514	-0.1344	-0.14315	-0.41819	-0.82086	0.24511	-0.03143	0.03143	0.35646	0.49108	-0.01609	0.13831	-1.04178	-0.66246
I_932259	RTP801	HIF-1 responsive RTP801, a ubiquitously expressed protein whose expression is induced by hypoxia, protects epithelial breast carcinoma MCF-7 cells from hypoxia and H2O2-induced apoptosis	0.09083	-0.09083	-0.68372	-0.61379	-0.11628	-0.1787	0.03635	-0.13866	-0.05575	0.05575	-0.85296	-0.40296	-0.25297	-0.04375	0.0095	-0.03173	0.14063	-0.14063	0.17496	0.4243	0.59583	0.39816	0.43354	0.28283
I_964007	S100A14	S100 calcium binding protein A14, putative calcium-binding protein of the S100 family, may be involved in malignant transformation, overexpressed in breast, ovarian, and uterine tumors, downregulated in kidney, rectal, and colon tumors	0.02968	-0.02968	-1.05036	-0.50324	-0.22792	-0.1519	-0.31231	-0.38884	-0.17592	0.17592	-0.59596	-0.24753	-0.3857	-0.21021	-0.41695	0.05744	0.26739	-0.26739	0.66315	0.35033	0.48764	0.04391	0.15638	-0.3897
I_937862	S100A3	S100 calcium-binding protein A3, a cysteine-rich member of the S100 family of calcium-binding proteins, contains separate calcium and zinc binding sites, elevated expression may be a marker for metastatic potential of breast cancer cells	-0.10088	0.10088	0.24328	0.24713	0.24368	0.14694	0.89754	0.41729	0.0093	-0.0093	0.23135	-0.08991	0.05266	0.06619	0.40759	0.29844	-0.15664	0.15664	-0.08432	0.02415	-0.16143	0.08056	-0.08306	0.06
I_961736	SAE1	Subunit of SUMO-1 activating enzyme 1 (sentrin-activating enzyme complex), catalyzes the transfer of SUMO-1 (UBL1), which regulates subcellular localization of a range of proteins, catalyzes the transfer of polymeric SUMO2 and SUMO3	-0.05688	0.05688	-0.01983	0.02473	0.0356	-0.0063	-0.21725	-0.19273	0.15157	-0.15157	-0.04896	-0.06328	-0.12646	-0.24069	-0.44163	-0.43991	-0.01396	0.01396	-0.09404	-0.0267	-0.21496	0.01323	-0.50533	-0.53966
I_961077	SALL4	Sal-like 4, a member of the SAL family, a putative transcription factor with zinc finger domain; mutations in the corresponding gene are associated with Duane radial ray syndrome and Okihiro syndrome	0.45582	-0.45582	-1.18674	-1.62315	-0.58182	-0.18865	-1.42867	-0.6979	-0.14141	0.14141	-0.00052	-0.3696	-0.40012	-0.55408	-0.85452	-0.16554	0.3328	-0.3328	-0.21561	-0.2965	-0.84743	-0.39625	-1.45653	-1.38578
I_957631	SAP30	Sin3-associated protein 30kD, a component of the Sin3-histone deacetylase corepressor complex, may have a role in viral transcription	-0.06221	0.06222	0.02147	0.1317	-0.15742	0.0241	0.30679	0.1861	0.1353	-0.1353	-0.29322	-0.12915	-0.12883	-0.03654	-0.43938	-0.44081	0.15012	-0.15012	0.16241	0.12829	0.04786	0.08954	-0.95503	-0.94211
I_929483	SBBI26	Protein containing five Kelch motifs and a BTB (BR-C, ttk and babor) or POZ (Pox virus and zinc finger) domain, has has low similarity to kelch-like 2 (human KLHL2), which binds actin and may be involved in intracellular protein traffic	0.01631	-0.01631	0.12031	0.06668	0.13748	0.01878	-0.01648	-0.05077	0.03645	-0.03645	0.02226	0.0808	-0.14491	-0.09044	-0.45508	-0.40067	0.03639	-0.0364	-0.02095	0.0807	-0.02928	0.04338	-0.51179	-0.46856
I_957200	SCAMP1	Secretory carrier membrane protein 1, a membrane protein that may function in post-Golgi vesicular transport	-0.05082	0.05082	0.78136	0.11045	-0.19389	-0.09134	0.60827	0.49151	0.03252	-0.03252	0.25176	0.13718	-0.05614	0.15402	0.16467	-0.1318	0.09285	-0.09286	-0.09347	0.22993	-0.14362	0.30735	0.50366	0.76441
I_928735	SCHIP1	Schwannomin-interacting protein 1, contains a leucine zipper coiled-coil domain and a PEST domain, interacts with schwannomin (NF2) in vitro, but only with a specific NF2 isoform that lacks exons 2 and 3 in vivo, may regulate NF2 activity	-0.03051	0.03051	0.62519	0.63581	-0.03225	-0.05108	-0.06471	-0.17293	0.11293	-0.11293	0.43886	0.43197	0.18779	0.11987	-0.08672	-0.07653	-0.01322	0.01322	-0.16826	-0.00582	-0.53119	-0.2813	0.11589	0.02297
I_928890	SDCCAG8	Serologically defined colon cancer antigen 8, protein that is expressed in colon cancer cells	-0.24429	0.24429	0.53331	0.15329	-0.02183	-0.0601	0.57061	0.33861	0.03124	-0.03124	0.12453	-0.19756	0.22847	-0.1015	-0.09187	-0.1087	-0.13743	0.13744	0.14918	0.08417	-0.11017	0.09054	0.51342	0.99586
I_961150	SDF2L1	Protein with strong similarity to mouse Sdf2l1, which may have a ligand transferase function, member of the protein O mannosyltransferase-rotated abdomen (pmt-rt) family), contains a MIR (protein mannosyltransferase, IP3R and RyR) domain	-0.04125	0.04125	-0.00945	0.01852	-0.01369	-0.04037	-0.35062	-0.27143	0.11817	-0.11817	-0.10091	-0.00589	0.04219	0.08202	-0.62214	-0.54178	-0.08071	0.08071	-0.02426	-0.22148	-0.21002	-0.23053	-0.40434	-0.4898
I_962954	SDR1	Short-chain dehydrogenase-reductase 1, catalyzes the NADPH-dependent reduction of all-trans-retinal to retinol, may play a role in visual system phototransduction; the corresponding gene is deleted in many neuroblastoma cell lines with MYCN amplification	-0.18447	0.18448	0.1443	0.33807	0.01119	0.12053	0.5627	0.864	-0.10282	0.10282	0.30152	0.27784	0.24949	0.53442	1.3276	0.92203	-0.10134	0.10134	0.35204	-0.148	0.43068	-0.00197	1.02383	0.71922
I_932229	SDS-RS1	Protein with high similarity to serine dehydratase (human SDS), which catalyzes the conversion of serine to pyruvate, member of the pyridoxal phosphate dependent enzyme beta family	-0.04743	0.04742	-0.40215	-0.09571	0.19664	-0.14052	0.08775	-0.46931	-0.06514	0.06514	-0.09479	0.00903	-0.10533	0.15204	0.82685	0.17963	-0.19938	0.19938	0.19975	0.11846	0.32497	0.40251	0.94196	1.19557
I_931537	SEC31B-1	Protein with high similarity to secretion 31 homolog (human KIAA0905), which is a putative component of the COPII coat of secretory pathway vesicles, and with a role in intracellular protein trafficking, contains five WD domains (WD-40 repeat)	0.03796	-0.03797	-0.70582	-0.70974	-0.78851	-0.30561	0.53599	0.25483	0.26943	-0.26943	-0.35979	-0.38513	-0.08498	-0.40387	0.19362	0.23353	-0.03275	0.03276	-0.29269	-0.02566	0.07146	0.35901	0.39558	0.49686
I_1000063	SEC8	Secretory protein 8, may be part of a complex involved in basolateral cargo delivery, protein is absent from the basolateral membrane of kidney cells in patients with autosomal dominant polycystic kidney disease	-0.05415	0.05416	0.20129	0.03959	-0.14682	0.10053	0.28655	-0.1892	0.07015	-0.07015	0.00186	0.08452	0.05575	0.05437	0.57328	0.15925	0.05186	-0.05187	0.02206	0.22409	-0.02412	0.19256	0.39406	0.8339
I_961084	SEI1	CDK4-binding protein p34SEI1, TRIP-Br family member, has a cyclin A binding domain and a hydrophobic heptad repeat, binds CDK4 and renders cyclin D1-CDK4 complex resistant to inhibition by p16INK4a (CDKN2A) in late G1 phase, promotes cell proliferation	0.09324	-0.09324	0.76783	0.48431	0.20421	-0.05854	-0.10313	-0.08731	0.05904	-0.05904	0.75477	0.6643	0.07345	0.0526	-0.07742	-0.00121	-0.06314	0.06314	0.34922	0.45524	-0.42059	0.01403	-0.07128	0.13202
I_1000472	SEL1L	SEL-1 (suppressor of lin-12, C. elegans)-like, a homolog of C. elegans sel-1, may function in cell-matrix adhesion or cell proliferation, strongly expressed in pancreas, downregulated in pancreatic carcinomas and aggressive breast cancers	-0.0568	0.0568	0.46584	0.53477	0.43659	-0.01063	0.27733	0.0026	-0.12095	0.12095	-0.02085	0.33612	0.30603	0.26092	0.2911	0.24971	-0.0034	0.0034	0.39627	0.16111	0.21519	0.21888	0.53191	0.78369
I_961581	SERPINF1	Pigment epithelium-derived factor, a neuroprotective protein that inhibits angiogenesis in the eye, regulates apoptosis and may play a role in cell differentiation, may be an antitumor agent in neuroblastoma, may be used to treat retinal vasculopathies	0.01364	-0.01363	-0.31985	-0.4086	-0.11501	-0.00115	0.14258	0.32195	0.11305	-0.11305	-0.17447	0.20711	-0.01138	-0.0923	0.12962	0.61117	-0.08169	0.08169	-0.10215	-0.53083	0.00738	-0.26582	0.43143	0.23668
I_930675	SERPING1	Serine (or cysteine) proteinase inhibitor, regulates the classical complement pathway through inhibition of C1, inhibits the alternative complement pathway, blood coagulation and vascular permeability; mutations causes hereditary angioedema	-0.13801	0.13801	0.02058	0.18096	-0.07092	-0.01284	0.44204	0.66477	0.00581	-0.0058	0.35767	0.12513	0.35792	0.33879	0.80862	0.82663	-0.02139	0.02139	-0.43769	-0.84322	-0.46822	-0.79737	-0.01426	0.20574
I_1110356	SERPINH2	Serine proteinase inhibitor clade H member 2 (colligin 2), member of the serine protease inhibitor family, a putative heat shock protein that may act as a chaperone during collagen biosynthesis, may play a role in the pathogenesis of peritoneal sclerosis	-0.01084	0.01084	0.36489	0.0309	-0.04782	-0.08715	0.03	0.05127	-0.02013	0.02013	0.18011	-0.21656	0.18477	0.00672	0.5562	0.31268	-0.09003	0.09003	-0.06058	0.07754	-0.16588	0.26488	0.35809	0.71753
I_928837	SES2	Protein with high similarity to p53 regulated PA26 nuclear protein (human PA26), which is induced by genotoxic stress and growth arrest and may function in cell growth regulation, member of the PA26 p53-induced protein (sestrin) family	0.10046	-0.10046	-0.86263	-0.95989	0.10317	-0.10539	-0.12279	-0.22742	0.1156	-0.1156	-0.73603	-0.75235	0.10723	0.04738	0.4156	0.34364	-0.13519	0.13519	0.29756	0.4685	0.3946	0.68398	0.76775	1.02773
I_1100752	SET	SET translocation (myeloid leukemia-associated), an MHC-interacting protein with an acidic C-terminus that is a potent and specific inhibitor of protein phosphatase 2A (PPP2CA); translocation of the gene to the NUP214 locus causes myeloid leukemogenesis	-0.0913	0.0913	0.20569	0.31687	0.2596	0.05128	-0.33726	-0.22822	0.08306	-0.08306	-0.36188	-0.53381	-0.26488	-0.08732	-0.40668	-0.41048	-0.14691	0.1469	0.18817	0.1202	0.24495	0.14581	-0.27834	-0.43532
I_933535	SFPQ	Splicing factor proline-glutamine rich, binds to polypyrimidine in introns to regulate splicing, a transcription corepressor, involved in the export of edited mRNAs; corresponding gene is involved in the chromosomal translocation in renal cell carcinomas	-0.10665	0.10664	-0.06453	0.08224	-0.1538	-0.0084	-0.42031	-0.42904	-0.00185	0.00186	-0.02602	0.21592	-0.01272	0.03992	-0.26408	-0.25363	0.08138	-0.08138	-0.21741	-0.47153	-0.15641	-0.35056	-1.07614	-1.27059
I_964993	SFRS10	Splicing factor arginine serine rich 10, binds splicing enhancer elements and activates pre-mRNA splicing, may have a role in vascular disease	-0.11669	0.11669	-0.12987	-0.00368	-0.14794	-0.00469	-0.09212	-0.03137	0.11231	-0.11231	-0.1201	-0.02614	-0.08152	0.00532	-0.51906	-0.56148	0.18194	-0.18194	-0.19133	-0.16984	-0.05781	-0.1012	-0.68173	-0.77316
I_957326	SFRS2	Serine-arginine-rich splicing factor 2, a pre-mRNA splicing factor that is involved in splice site selection and spliceosome assembly, contains an RNA recognition motif and serine-arginine-rich domain	0.04392	-0.04392	-0.00731	-0.03648	0.0065	-0.0602	-0.11212	-0.09768	0.06493	-0.06493	0.16865	0.11952	-0.06894	0.02813	-0.58727	-0.39383	0.05307	-0.05308	-0.11622	-0.03989	-0.09783	0.01309	-0.65626	-0.6797
I_957352	SFRS3	Splicing factor arginine/serine-rich 3, a splicing factor of the SR family that contains an RNA-binding motif, is a component of the spliceosome and may be involved in mRNA splicing	0.03089	-0.03089	0.23385	0.109	-0.01715	-0.13403	0.06541	-0.08599	0.16791	-0.16791	0.13254	0.14902	-0.0647	0.00687	-0.65612	-0.5739	0.04972	-0.04972	0.2224	0.44142	-0.11522	0.21777	-0.53376	-0.36595
I_932436	SFRS7	Splicing factor arginine serine rich 7, a splicing factor of the SR protein family containing an RNA binding domain (RBD) and a serine/arginine (SR) domain that is implicated in alternative pre-mRNA splicing	0.06082	-0.06082	0.26326	0.13033	-0.00881	-0.15088	0.05392	-0.0412	-0.0315	0.0315	0.21968	0.19988	-0.17875	0.11803	-0.46047	-0.44444	-0.00962	0.00962	0.09932	0.12953	-0.1237	-0.00645	-0.49549	-0.52639
I_1100563	SHCBP1	Protein with high similarity to shc SH2-domain binding protein 1 (protein expressed in activated lymphocytes, mouse Shcbp1), which binds mouse Shc1 and is expressed only in actively dividing cells and may function in cell cycle signaling pathways	0.47579	-0.47579	1.88301	1.46573	0.93618	1.31987	0.66222	0.59439	-0.38583	0.38583	0.29398	0.45289	0.1483	0.36372	0.15145	-0.22112	-0.12699	0.127	0.56868	0.57041	0.10241	0.23998	-0.6747	-0.7884
I_929663	SIAT4A	Sialyltransferase 4A (beta-galactoside alpha-2,3-sialyltransferase), member of a sialyltransferase 4 family, catalyzes the transfer of NeuAc from CMP-NeuAc to asialo-fetuin	-0.07599	0.07599	0.66955	0.58687	0.00935	-0.03097	-0.23686	-0.29181	0.03984	-0.03983	0.0265	0.08473	-0.00908	0.06692	-0.12912	0.08109	-0.08248	0.08248	0.34034	0.24152	0.14612	0.02431	0.2153	0.03216
I_965514	SIAT7E	Protein with strong similarity to sialyltransferase 7E (mouse Siat7e), which is an N-acetylgalactosamine alpha-2,6-sialyltransferase that functions in lipid and carbohydrate metabolism, member of the sialyltransferase family	1.63807	-1.63807	1.49813	-0.24263	0.90444	2.19786	1.48717	2.1592	-0.1886	0.1886	0.36223	0.42137	0.37616	1.96924	0.85808	0.81573	-0.47777	0.47778	0.659	0.70576	1.33536	1.18082	0.86377	1.33536
I_963120	SIL	TAL1 interrupting locus, may play a role in cell proliferation and lymphoid development; rearrangement of corresponding gene disrupts TAL1 expression and is associated with acute T-cell lymphoblastic leukemia	-0.15997	0.15997	0.09023	0.42691	0.25766	0.17075	-0.20087	-0.33593	-0.19225	0.19225	0.23084	-0.00598	0.0372	0.20013	-0.58592	-0.39217	0.07107	-0.07107	0.66563	-0.35179	0.13363	0.15957	-0.68581	-0.4911
I_928952	SIP	Calcyclin binding protein, interacts with seven in absentia homolog 1 (SIAH1), may be involved in cell cycle arrest in response to genotoxic injury	0.01992	-0.01992	0.31734	0.00917	-0.09573	0.01295	-0.0946	-0.2348	0.14116	-0.14116	0.08097	0.20743	-0.03154	-0.02811	-0.64232	-0.4015	-0.09487	0.09487	0.07586	0.0844	-0.07668	0.04056	-0.61567	-0.63996
I_958556	SIP1	Survival of motor neuron (SMN) interacting protein 1, member of a complex that includes SMN1 and interacts with spliceosomal snRNP proteins, may be involved with snRNP biogenesis, plays a critical role in pre-mRNA splicing and in spliceosome assembly	0.01338	-0.01339	-0.11184	-0.27561	-0.01618	0.02428	0.18781	0.0476	0.08581	-0.08581	-0.26352	-0.14801	-0.08231	-0.18254	-0.45589	-0.47485	-0.01511	0.01511	-0.26265	0.00864	-0.12405	0.03886	-0.73927	-0.73807
I_959379	SIVA	Siva, a death domain containing protein that interacts with the tumor necrosis factor receptor family member CD27 (TNFRSF7) and induces apoptosis, also interacts with a coxsackievirus B3 capsid protein and may be involved in viral pathogenesis	0.09779	-0.09779	0.05162	-0.04179	0.08551	-0.1677	-0.16287	-0.37791	-0.07704	0.07704	-0.12659	0.02323	-0.12908	0.10046	-0.43212	-0.37163	-0.09711	0.09712	0.06803	-0.025	-0.0379	-0.01838	-0.59777	-0.55518
I_957374	SLBP	Histone mRNA 3 stem-loop binding protein, has a novel RNA-binding domain and functions in histone pre-mRNA processing	-0.03743	0.03744	0.06531	0.15255	-0.14221	-0.09101	-0.13511	-0.16372	0.18147	-0.18147	0.02662	-0.11648	-0.11267	-0.18283	-0.57411	-0.42665	0.03929	-0.03928	-0.03512	0.05328	-0.32096	-0.06405	-0.6697	-0.69248
I_960219	SLC13A2	Sodium-dependent dicarboxylate cotransporter (solute carrier family 13 member 2), reabsorbs Krebs cycle intermediates, such as succinate and citrate, from the renal tubular filtrate	0.07835	-0.07835	-0.04042	-0.22112	0.03091	-0.04575	-0.08539	0.12128	0.22771	-0.22771	0.22032	0.02042	0.08173	0.14582	0.70025	0.28174	-0.17239	0.17239	0.12278	0.28021	0.17674	0.31617	0.57121	1.14674
I_930641	SLC1A1	Solute carrier family 1 member 1, a high affinity glutamate transporter that mediates synaptic reuptake of glutamate, functions in excitatory neurotransmission; mutation of the mouse Slc1a1 gene causes dicarboxylic aminoaciduria	0.33104	-0.33104	0.83894	0.98503	0.11114	0.25362	0.75837	0.75649	-0.36971	0.36971	0.54279	1.35547	0.73939	0.51732	0.72497	0.83583	-0.11334	0.11335	0.28266	-0.34753	0.12248	-0.61235	-0.06608	0.00669
I_941798	SLC20A1	Solute carrier family 20 member 1 (gibbon ape leukemia virus receptor), a high-affinity sodium-inorganic phosphate cotransporter, plays a role in phosphate transport and metabolism, acts as a cell-surface receptor for gibbon ape leukemia virus	-0.04998	0.04998	0.67102	0.70799	-0.34302	-0.12592	-0.18145	-0.26113	0.30625	-0.30625	0.68575	0.47134	-0.19494	-0.30822	-0.6631	-0.66604	-0.04603	0.04603	0.06927	0.38404	-0.37086	-0.34258	-0.30411	-0.07048
I_957767	SLC22A4	Solute carrier family 22 member 4 (novel organic cation transporter 1), transports various organic cations in a pH-dependent manner, also transports carnitine, may act in secretion of cationic xenobiotics across the renal epithelial brush-border membrane	-0.23275	0.23275	0.97644	0.51208	0.2558	0.25561	0.02497	-0.1347	-0.00875	0.00874	0.46408	0.21978	0.1369	0.09109	0.11677	-0.10099	0.11097	-0.11096	-0.29147	-0.02208	-0.31225	-0.39135	-0.42997	0.25076
I_962687	SLC25A21	Solute carrier family 25 member 21 (mitochondrial oxodicarboxylate carrier), transports 2-oxoadipate, 2-oxoglutarate, adipate, and glutarate across the mitochondrial inner membrane by a counter-exchange mechanism, defects may cause 2-oxoadipate acidemia	0.02462	-0.02462	-1.17506	-0.78619	-0.26533	-0.19996	-0.41477	-0.30467	0.07667	-0.07667	-0.73207	-0.57635	-0.41848	-0.20677	-0.05024	0.15129	0.56879	-0.56879	-1.45068	-1.03113	-0.99298	-1.39365	-1.80369	-1.57656
I_966087	SLC25A5	Solute carrier family 25 member 5 (adenine nucleotide translocator 2), may mediate the exchange of ADP and ATP between the cytosol and mitochondria, expression is altered in dilated cardiomyopathy	-0.02377	0.02378	0.09724	0.01587	0.11158	0.03989	0.07272	-0.17262	-0.08141	0.08141	0.13969	0.15771	-0.08116	0.23745	-0.44921	-0.48691	0.01626	-0.01627	0.06714	0.00925	-0.05553	-0.0214	-0.49173	-0.54634
I_946563	SLC27A3	Protein with strong similarity to fatty acid transport protein (mouse Slc27a3), which is a plasma membrane protein facilitating long chain fatty acid uptake across the plasma membrane, member of the AMP-binding enzyme family	0.02219	-0.02219	-0.2584	-0.40826	-0.19404	-0.26716	0.41882	0.1548	0.01154	-0.01154	-0.3558	-0.2847	-0.12559	-0.05859	0.07332	0.20683	-0.03468	0.03468	-0.1738	-0.12522	0.00858	0.17644	0.22667	0.22378
I_931181	SLC31A2	Solute carrier family 31 member 2, a putative copper ion transporter expressed in all tissues	0.0124	-0.01241	0.59676	0.23791	0.19468	-0.09518	0.63811	0.21521	0.00936	-0.00936	0.29533	0.1305	0.21606	0.3072	0.4517	0.50757	-0.10779	0.1078	-0.32977	-0.01584	-0.36059	-0.02776	0.06065	0.33135
I_959849	SLC7A8	Solute carrier family 7 member 8 (L amino acid transporter 2), a sodium independent neutral amino acid transporter that induces system L transport activity as a complex with 4F2hc (SLC3A2), may be involved in epithelial amino acid absorption	-0.10905	0.10905	-0.39581	-0.35343	-0.35108	-0.19522	0.34792	-0.24722	0.1677	-0.1677	-0.3526	-0.13055	-0.45292	-0.20463	0.54159	0.75891	0.04996	-0.04997	0.5776	0.59052	0.6497	0.42324	0.90626	1.0463
I_962949	SMAP-5	Protein of unknown function, has a region of moderate similarity to S. cerevisiae Yip1p, which is involved in vesicular transport and interacts with transport GTPases S. cerevisiae Ypt1p and Ypt31p at the Golgi membrane	-0.07748	0.07749	0.47776	0.82293	-0.12596	-0.03124	0.25085	0.33127	0.02468	-0.02468	0.44475	0.39008	-0.15152	0.01713	0.14116	-0.05168	-0.27813	0.27813	0.08687	0.21508	0.87673	0.16935	1.8832	1.35904
I_930520	SMARCA2	SWI-SNF related matrix associated actin dependent regulator of chromatin subfamily a member 2, mediates transcriptional regulation by nuclear receptors by remodeling chromatin, controls cell cycle through association with RB1, regulates myogenesis	-0.19493	0.19492	0.59864	0.63073	0.5211	0.14315	0.67217	0.53168	-0.10151	0.10151	-0.27511	-0.40857	0.02352	0.08779	0.37884	0.38378	0.04807	-0.04806	0.32157	0.09866	0.17841	0.23043	0.3904	0.6151
I_930829	SMC2L1	Structural maintenance of chromosomes 2 yeast - like 1, core component of the condensin complex, may be involved in the initiation of mitotic chromosome condensation	-0.08368	0.08367	0.30511	0.17443	-0.07398	-0.03619	-0.28435	-0.37454	0.21071	-0.21071	-0.02326	-0.0721	-0.14019	-0.26566	-0.77466	-0.91746	-0.03364	0.03364	0.05532	0.19672	-0.1916	-0.00728	-0.91872	-0.55743
I_928692	SMC4L1	Chromosome-associated polypeptide C, member of the SMC family, a component of the condensin complex, which associates with mitotic chromosomes and is involved in mitotic chromosome condensation	-0.14348	0.14348	0.03697	0.19243	0.03843	0.07161	-0.38581	-0.2363	0.05724	-0.05724	-0.04504	0.03444	0.00094	0.06524	0.01296	-0.04042	0.07821	-0.07821	0.27524	0.08515	0.19356	0.11417	-0.48153	-0.65679
I_931559	SMPD1	Sphingomyelin phosphodiesterase 1 (acid sphingomyelinase), converts sphingomyelin to ceramide, which initiates stress-induced apoptosis, deficiency of lysosomal form is associated with Niemann-Pick disease, secreted form may play a role in ...	0.00872	-0.00873	0.5881	0.10626	0.15514	0.32895	0.2551	0.32743	0.12063	-0.12063	-0.05229	-0.23079	0.27009	-0.02109	0.45103	0.51953	-0.16653	0.16653	0.24937	0.10479	-0.11797	0.15425	0.62024	1.05506
I_958977	SMS	Spermine synthase, catalyzes the conversion of spermidine to spermine, requires decarboxylated S-adenosylmethionine as the cofactor, involved in polyamine metabolism, positive regulator of cell proliferation and intracellular protein degradation	0.09665	-0.09665	0.41884	-0.02262	0.00362	-0.12982	-0.04728	-0.42854	-0.19601	0.19602	0.09059	0.15537	-0.06335	0.33325	-0.30566	-0.28128	0.02031	-0.0203	0.06401	0.16574	-0.0557	0.16123	-0.38173	-0.38816
I_1841289	SMTN	Smoothelin, a smooth muscle cell-specific putative structural protein with an actinin-type actin-binding domain, may be involved in muscle development or smooth muscle contraction, regulated by p53 (TP53)	-0.19172	0.19172	0.58218	0.63568	0.20781	0.23636	-0.36769	0.06249	0.04729	-0.04729	0.54596	0.24277	0.11514	0.196	0.28174	-0.0907	-0.04459	0.04459	0.2203	0.12887	-0.08122	-0.16858	0.22441	0.10768
I_959025	SMURF2	SMAD ubiquitination regulatory factor 2, HECT class ubiquitin E3 ligase, interacts with SMAD proteins to regulate transforming growth factor-beta signaling pathways by targeting pathway components for proteosomal degradation	0.23768	-0.23768	1.48245	1.57904	0.83985	1.28254	0.18681	0.78678	-0.30958	0.30958	0.59616	0.84158	0.38712	0.69814	0.54966	0.24921	0.25691	-0.25691	0.67486	-0.18041	-0.26028	-0.16691	0.5519	0.28858
I_960993	SNAI1	Snail 1 (Drosophila) homolog, a zinc-finger transcriptional repressor, represses expression of E-cadherin (CDH1) and aromatase (CYP19), involved in tumor progression	-0.05246	0.05245	0.54796	0.38707	-0.06635	-0.11466	-0.12227	-0.09024	-0.0201	0.0201	0.15013	0.19409	-0.03128	-0.07993	-0.10738	-0.10977	-0.0301	0.0301	-0.12037	-0.15122	-0.10925	-0.17077	-0.50537	-0.43415
I_959930	SNRPA1	Small nuclear ribonucleoprotein polypeptide A, component of the U2 snRNP particle which is a required constituent of the spliceosome	-0.0146	0.0146	0.08144	0.04208	0.0319	-0.02935	-0.17345	-0.20247	0.15736	-0.15736	0.04692	0.06281	-0.10417	-0.05057	-0.4477	-0.53671	-0.01436	0.01436	-0.05086	0.091	-0.15824	0.07916	-0.37255	-0.34591
I_960641	SNRPD1	Small nuclear ribonucleoprotein D1 polypeptide, a member of the core heptamer of spliceosomal U snRNPs, involved in mRNA splicing, binds survival of motor neurons (SMN1) and the methyltransferase SKB1, autoantigen in systemic lupus erythematosus	-0.00594	0.00594	0.13323	0.0458	-0.01539	-0.08307	-0.27726	-0.40372	0.11709	-0.11709	-0.1611	-0.35294	-0.15956	-0.17575	-0.42294	-0.44699	-0.06679	0.06679	-0.16196	0.03531	-0.2993	0.0285	-0.89324	-0.81602
I_929998	SNRPE	Small nuclear ribonucleoprotein E, a small nuclear ribonucleoprotein (snRNP) that forms a 6S core particle with other snRNPs, member of the Sm family that interacts with cytosolic snRNA and transports it to the nucleus, may be involved in snRNP ...	-0.05955	0.05956	0.00604	0.14342	-0.07583	0.09409	-0.17134	-0.28266	0.21139	-0.21139	-0.14553	-0.26753	-0.16872	-0.11579	-0.51946	-0.45625	-0.04961	0.04961	-0.36177	-0.12444	0.05434	-0.15514	-0.6881	-0.70172
I_1100581	SNRPG	Sm core protein G, one of several common snRNP spliceosomal proteins, involved in snRNP formation and a target of antibodies in patients with systemic lupus erythematosus (SLE)	-0.07241	0.07242	-0.04742	0.12543	0.12318	0.03293	-0.18263	-0.17366	-0.05062	0.05062	-0.06888	-0.00552	-0.09208	0.11146	-0.42094	-0.5039	0.02033	-0.02033	-0.04765	-0.21249	-0.08305	-0.18907	-0.66352	-0.87364
I_958536	SNRPN	Small nuclear ribonucleoprotein polypeptide N, plays a role in mRNA splicing; deletion, loss of expression and imprinting mutations are associated with Prader-Willi syndrome	0.0752	-0.0752	0.13011	-0.11852	-0.2091	0.22696	-0.29652	0.50275	0.51784	-0.51784	0.19273	-0.03412	0.40864	0.09201	0.65531	0.78218	-0.17917	0.17916	0.2476	0.15937	0.14467	0.4004	0.80808	0.89818
I_932166	SNX17	Sorting nexin 17, likely member of the sorting nexin family that contains a Phox homology (PX) domain and a FERM domain, interacts with the C-terminus of P-selectin (SELP) and is predicted to be involved in intracellular protein transport	0.04044	-0.04044	-0.18655	-0.11575	-0.34086	-0.15666	-0.2688	-0.16975	-0.14685	0.14685	-0.00866	-0.05607	0.17238	-0.04633	0.37583	0.6289	-0.00568	0.00569	0.55237	0.21054	0.3777	0.22807	0.82272	0.74909
I_966733	SNX9	Sorting nexin 9, contains SH3 and PX domains, interacts with ADAM9 and ADAM15 metalloprotease precursors, interacts with the clathrin associated protein complex AP2, may be involved in intracellular protein transport, endocytosis, and protein degradation	0.00549	-0.00549	-0.03002	-0.05809	-0.09266	-0.13189	0.3769	0.27194	0.20153	-0.20153	0.09183	0.08007	-0.02779	-0.14426	0.34163	0.39316	-0.03436	0.03436	-0.31051	-0.26847	-0.52369	-0.14196	-0.35251	-0.18202
I_1100710	SOCS5	Suppressor of cytokines signaling 5 (cytokine inducible SH2 protein 6), contains SH2 domain and SOCS box, negatively regulates cytokine signaling via JAK-STAT pathways	-0.04274	0.04274	0.63477	0.57457	-0.0344	0.13006	0.28307	0.46732	0.22741	-0.22742	0.74321	0.49904	0.0779	0.22326	0.09859	0.40421	-0.06751	0.06751	0.1158	0.02522	-0.47923	-0.09168	0.4797	-0.07835
I_1000562	SOX11	SRY box 11, transcriptional activator, member of the SYR related HMG box family, may be involved in neural differentiation and the regulation of LINE retrotransposons	-0.1083	0.1083	-0.10218	-0.19633	-0.45947	-0.29439	-0.81639	-0.67783	0.10452	-0.10451	-0.43935	-0.65227	-0.00244	-0.91563	-0.76527	0.36465	0.27401	-0.27401	-0.15086	-0.24377	-0.20139	-0.46848	-1.54119	-0.85412
I_962428	SOX3	SRY box 3, putative transcription factor, member of the SYR related HMG box family, may be involved in the regulation of central nervous system development, exists as a tumor antigen in small cell lung cancer	-0.06487	0.06487	-0.58041	-0.3038	-0.1113	-0.05797	-0.07577	-0.17913	0.09594	-0.09594	-0.80404	-0.29032	-0.36809	-0.44832	-0.15773	-0.28589	0.19445	-0.19446	-0.45385	-0.10106	0.15747	0.00699	-0.66233	-0.94559
I_960223	SPAG5	Sperm associated antigen 5, a mitotic spindle-associated protein that may regulate spindle function or dynamics, expressed at high levels in the testis	0.00873	-0.00874	0.35101	0.33584	0.24931	0.16668	-0.80698	-0.78967	0.1509	-0.15091	0.15903	0.02735	0.04404	0.02802	-0.03236	0.03629	-0.05684	0.05685	0.23075	0.37086	0.07822	0.24692	-1.43886	-1.38253
I_957176	SPHK1	Sphingosine kinase-1, phosphorylates sphingosine to form sphingosine 1-phosphate, which is a lipid second messenger mediating signaling pathways involved in diverse processes including cell adhesion, apoptosis, and immune response	-0.07691	0.07691	0.44673	0.49817	-0.04146	-0.07173	-0.70275	-0.49736	-0.02751	0.02751	0.40587	0.26649	0.09333	0.06002	-0.10304	-0.24436	-0.10025	0.10026	0.10032	-0.18078	-0.13018	-0.35255	-0.61443	-0.43298
I_966129	SPINT2	Serine protease inhibitor Kunitz type 2 (bikunin), inhibits hepatocyte growth factor activator (HGFAC) and serine proteases involved in coagulation and fibrinolysis, overexpressed in pancreatic cancer, may play roles in urolithiasis and glioma ...	-0.05738	0.05739	-1.23164	-0.43263	-0.04767	-0.09552	-0.29843	-0.35342	-0.04687	0.04687	-0.82873	-0.35961	-0.75671	-0.22118	-0.5147	-0.08507	0.30983	-0.30983	0.63583	0.00616	0.69409	0.27548	-0.00996	-0.68092
I_957308	SPON2	Spondin 2, a putative secreted protein that is a member of the F-spondin superfamily of proteins; expression is decreased in lung cancer cells	-0.02624	0.02624	-0.37064	-0.32431	-0.09789	-0.18927	0.54688	0.17166	0.10743	-0.10743	-0.28069	-0.06677	-0.29176	-0.04419	0.63966	0.85394	-0.05304	0.05304	0.50613	0.66497	0.78098	0.25228	0.05395	0.2246
I_960842	SPRY2	Sprouty homolog 2, inhibits FGF signaling and MAP kinase activation, involved in cell migration and proliferation, interacts with CBL and GRB2, translocates to membrane ruffles following EGF stimulation	-0.00851	0.00852	0.20875	0.04002	0.06959	0.05118	0.00522	-0.10304	0.0897	-0.0897	-0.31633	-0.40101	-0.16101	-0.08246	-0.6262	-0.24871	-0.08386	0.08386	-0.41996	-0.39095	-0.53205	-0.57952	-0.46803	-0.53082
I_963362	SQRDL	Protein with moderate similarity to sulfide:quinone oxidoreductase (S. pombe Hmt2p), which is involved in sulfide metabolism and resistance to heavy metals	-0.05915	0.05915	-0.01028	0.04811	-0.06111	0.01054	0.35611	0.35676	0.26692	-0.26692	0.01063	0.00183	-0.0232	-0.21728	0.5943	0.50479	-0.04307	0.04308	-0.12775	-0.12424	-0.32999	-0.01524	0.07614	0.249
I_928588	SR140	Protein containing an RNA recognition motif (RRM, RBD, or RNP) and a Surp module (SWAP domain), which may bind RNA, has low similarity to uncharacterized C. elegans C07H6.4	0.06633	-0.06633	0.15948	-0.01794	-0.08577	-0.04979	0.2845	-0.12772	-0.00535	0.00535	0.13634	0.19425	-0.37803	-0.01874	-0.35057	-0.12517	0.06775	-0.06775	0.07273	0.18247	-0.01033	0.04143	-0.47217	-0.46513
I_930309	SRI	Sorcin, an EF-hand calcium-binding protein, may be involved in multidrug resistance, a potential modulator of intracellular calcium levels through interaction with the ryanodine receptor	0.02506	-0.02506	0.46042	0.14003	0.28011	-0.07064	0.50083	0.52654	-0.09508	0.09509	0.34109	0.11989	0.063	0.12668	0.044	0.13964	0.14039	-0.14039	0.33008	0.13889	-0.08599	0.67726	0.67412	0.95007
I_958220	SSAT2	Protein with high similarity to mouse Sat, which catalyzes the rate limiting step of polyamine catabolism and may play roles in neuroprotection and excitatory neurotransmission, contains a acetyltransferase (GNAT) domain	0.07623	-0.07623	-0.05184	-0.21835	0.00013	-0.17379	0.63017	0.40014	-0.04355	0.04355	-0.14165	-0.16713	-0.02063	0.03745	0.48157	0.46183	-0.11548	0.11549	-0.10218	-0.02807	-0.06235	0.11261	0.01082	0.15376
I_931817	SSPN	Sarcospan, part of the dystrophin-glycoprotein complex of the muscle sarcolemma, expression in muscle is reduced in patients with Duchenne muscular dystrophy; the corresponding gene is amplified in many tumors	0.00762	-0.00762	0.35766	0.14987	0.14827	-0.14983	0.78059	0.38745	-0.19413	0.19413	0.31349	0.2493	0.20638	0.23933	0.48937	0.48461	-0.05656	0.05656	-0.59216	-0.32816	-0.48689	-0.15829	-0.06811	-0.21185
I_1002348	STAG3	Stromal antigen 3 (stromalin 3), a putative component of the synaptonemal complex, may function in maintaining synaptonemal complex structure during the pachytene phase of meiosis	-0.17057	0.17056	-0.58746	-0.09157	-0.15752	0.15231	-0.19968	0.02578	0.00261	-0.00261	-0.26435	-0.57866	-0.53097	-0.78651	-0.62999	-0.65577	0.05343	-0.05343	-0.10733	-0.1854	-0.02908	-0.01493	-0.81879	-1.41949
I_929748	STAR	Steroidogenic acute regulatory protein, regulates conversion of cholesterol into pregnenolone in adrenal cortex and gonads likely through transport of cholesterol to the mitochondria; gene mutations cause congenital lipoid adrenal hyperplasia	-0.1996	0.1996	-0.89506	-0.31465	-0.02117	0.24024	-0.15427	-0.42385	0.02758	-0.02758	-0.31715	-0.33395	-0.30713	-0.26702	-0.46229	-0.46767	0.39286	-0.39285	-0.54623	-0.39649	0.04094	-0.3831	-1.35195	-1.22627
I_938024	STAT1	Signal transducer and activator of transcription 1, transcription factor that mediates interferon-induced JAK kinase signal transduction, plays roles in induction of apoptosis, regulation of cell proliferation, and antibacterial and antiviral responses	0.11103	-0.11104	0.63441	0.1654	0.15139	-0.10898	1.01941	0.89872	0.03235	-0.03236	0.13796	0.11786	0.22756	0.09245	0.53525	0.28602	-0.04955	0.04954	-0.24307	-0.04419	-0.55281	0.12653	0.29623	0.86012
I_932352	STAT2	Signal transducer and activator of transcription 2, a member of the STAT family of transcription factors that mediate Janus kinase signal transduction, component of IFN stimulated gene factor 3 complex, which mediates IFN-induced gene transcription	0.00359	-0.00359	0.09952	0.15365	0.02618	0.03686	0.13592	0.24817	-0.02896	0.02896	0.07572	-0.05961	0.08439	-0.01339	0.48538	0.1926	-0.13684	0.13684	0.17773	0.00023	-0.0914	-0.04419	0.50817	0.66279
I_960761	STK12	Serine threonine kinase 12, maximally expressed during G2/M phases and may function in cytokinesis and megakaryocyte differentiation, possibly involved in ploidy increases in tumor cells	-0.08618	0.08618	0.01791	-0.20187	-0.06241	0.02379	-0.62846	-0.63891	0.14498	-0.14498	-0.1283	0.06259	0.0685	-0.43789	-0.19401	0.16798	0.08119	-0.08119	0.84031	0.55665	0.18569	0.46807	-0.53145	-0.15275
I_962665	STK18	Serine threonine kinase 18, a putative protein kinase belonging to the polo family of mitotic regulators, expressed in proliferating cells during specific phases of the cell cycle, overexpressed in colorectal cancer	0.02515	-0.02515	0.20932	0.01206	0.03331	-0.04136	-0.30421	-0.23424	0.18957	-0.18958	-0.32372	-0.06902	-0.23212	0.02758	-0.47785	-0.43632	0.00191	-0.00191	0.12576	0.24938	-0.01248	0.10775	-0.83172	-0.99637
I_961689	STK6	Serine threonine kinase 6 (aurora-A), acts to maintain genomic stability by regulating chromosome segregation and cytokinesis, overexpressed in multiple tumor cell types and possibly involved in tumorigenesis	-0.03876	0.03876	0.37967	0.32276	0.2281	0.25942	-0.53118	-0.43883	0.19379	-0.19379	0.14447	0.1274	0.03335	-0.02417	0.33633	0.2677	0.03805	-0.03805	0.3736	0.52363	0.15553	0.35478	-1.07509	-0.96185
I_931325	STMN1	Stathmin (oncoprotein 18), a cytosolic phosphoprotein that that binds microtubules and slows down GDP dissociation from tubulin, acts in the regulation of cell cycle and microtubule catastrophe (disassembly), overexpressed in certain tumors	-0.13556	0.13556	0.09555	0.15811	0.07196	0.15658	-0.28523	-0.48865	-0.11739	0.1174	0.15382	0.21721	-0.15594	0.11558	-0.56968	-0.60232	0.17442	-0.17442	0.03165	-0.16079	-0.10596	-0.16843	-0.6332	-0.78141
I_961051	STMN3	SCG10 like-protein, a member of the stathmin family of cytosolic phosphoproteins that may contribute to gastrointestinal tract tumor progression	0.0683	-0.0683	-0.93023	-0.59715	-0.40291	-0.3966	-0.47957	-0.4439	0.09334	-0.09334	-0.80317	-0.41263	-0.28956	-0.59062	-0.84904	-0.16322	0.09207	-0.09208	0.27573	0.07826	0.45347	0.08161	-0.00853	-0.08218
I_960418	STRIN	Protein with a region of strong similarity to murine Mm.42154, which contains a C3HC4 type (RING) zinc finger that may mediate protein-protein interactions	-0.14236	0.14236	0.05387	0.15424	-0.04037	0.06666	0.07323	-0.12882	0.16731	-0.16731	-0.05374	-0.01274	-0.0322	-0.23182	-0.32969	-0.28563	-0.00102	0.00102	-0.00135	0.11256	-0.20838	-0.19042	-0.55532	-0.53009
[truncated: 111 more rows]
